# Supplementary material for: Psychiatric manifestations of rare variation in medically actionable genes: a PheWAS approach
Source: BMC Genomics. 2022 May 19;23:385. doi: 10.1186/s12864-022-08600-x (PMC9121574; doi:10.1186/s12864-022-08600-x)
Supplement: Supplementary file 2 — Additional file 2: Table S1. A list of 56 genes and the associated medical conditions recommended by ACMG for return of results. Table S2. The full list of the extracted PheCodes and the corresponding prevalences among the 15,181 individuals analyzed in the study. Table S3. The 37 PheCodes of psychiatric disorders with at least 75 cases selected for burden analysis. Table S4. Pairwise phenotypic correlations between the 37 psychiatric phenotypes. Table S5. Pairwise phenotypic correlations between the 37 psychiatric phenotypes and all 966 phenotypes with at least 75 cases. Table S6. PheWAS results of rare variation and psychiatric disorders: ACMG-56 genes. Table S7. PheWAS results of rare variation and psychiatric disorders: CACNA1C. Table S8. PheWAS results of rare variation and psychiatric disorders: TCF4. Table S9. PheWAS of rare variation and psychiatric disorders: interaction with age. Table S10. PheWAS of rare variation and psychiatric disorders: interaction with sex. Table S11. PheWAS of rare variation and psychiatric disorders: combining variation across 58 genes by functional annotation. Table S12. Gene Ontology analysis of the 58 genes: biological process. Table S13. Gene Ontology analysis of the 58 genes: cellular component. Table S14. Gene Ontology analysis of the 58 genes: molecular function. Table S15. PheWAS of rare variation and psychiatric disorders: 34 genes from the top GO term of biological process. Table S16. PheWAS of rare variation and psychiatric disorders: 16 genes from the top GO term of cellular component. Table S17. PheWAS of rare variation and psychiatric disorders: 25 genes from the top GO term of molecular function. Table S18. Phenotypic comparison between eMERGE and UKB-GeneBass. Table S19. PheWAS results of rare variation and psychiatric disorders in UKB-GeneBass. Table S20. Suggested gene associations in eMERGE (Table 1) vs. in UKB-GeneBass [file 12864_2022_8600_MOESM2_ESM.xlsx]

## Sheet: Index
Table S1. A list of 56 genes and the associated medical conditions recommended by ACMG for return of results
Table S2. The full list of the extracted PheCodes and the corresponding prevalences among the 15,181 individuals analyzed in the study
Table S3. The 37 PheCodes of psychiatric disorders with at least 75 cases selected for burden analysis
Table S4. Pairwise phenotypic correlations between the 37 psychiatric phenotypes
Table S5. Pairwise phenotypic correlations between the 37 psychiatric phenotypes and all 966 phenotypes with at least 75 cases
Table S6. PheWAS results of rare variation and psychiatric disorders: ACMG 56 genes
Table S7. PheWAS results of rare variation and psychiatric disorders: CACNA1C
Table S8. PheWAS results of rare variation and psychiatric disorders: TCF4
Table S9. PheWAS of rare variation and psychiatric disorders: interaction with age
Table S10. PheWAS of rare variation and psychiatric disorders: interaction with sex
Table S11. PheWAS of rare variation and psychiatric disorders: combining variation across 58 genes by functional annotation
Table S12. Gene Ontology analysis of the 58 genes: biological process
Table S13. Gene Ontology analysis of the 58 genes: cellular component
Table S14. Gene Ontology analysis of the 58 genes: molecular function
Table S15. PheWAS of rare variation and psychiatric disorders: 34 genes from the top GO term of biological process
Table S16. PheWAS of rare variation and psychiatric disorders: 16 genes from the top GO term of cellular component
Table S17. PheWAS of rare variation and psychiatric disorders: 25 genes from the top GO term of molecular function
Table S18. Phenotypic comparison between eMERGE and UKB-GeneBass
Table S19. PheWAS results of rare variation and psychiatric disorders in UKB-GeneBass
Table S20. Suggested gene associations in eMERGE (Table 1) vs. in UKB-GeneBass

## Sheet: S1. ACMG56 genes
Gene	Disease name and MIM number	In GeneBass
ACTA2	Aortic aneurysm, familial thoracic 6 (MIM 611788)	Y
ACTC1	Familial hypertrophic cardiomyopathy 11 (MIM 612098)	Y
APC	Adenomatous polyposis coli (MIM 175100)	Y
APOB	Familial hypercholesterolemia (MIM 143890)	Y
BRCA1	Breast-ovarian cancer, familial 1 (MIM 604370)	Y
BRCA2	Breast-ovarian cancer, familial 2 (MIM 612555)	Y
CACNA1S	Malignant hyperthermia (MIM 145600)	Y
COL3A1	Ehlers-Danlos syndrome, type 4 (MIM 130050)	Y
DSC2	Arrhythmogenic right ventricular cardiomyopathy, type 11 (MIM 610476)	Y
DSG2	Arrhythmogenic right ventricular cardiomyopathy, type 10 (MIM 610193)	Y
DSP	Arrhythmogenic right ventricular cardiomyopathy, type 8 (MIM 607450)	Y
FBN1	Marfan's syndrome (MIM 154700)	Y
GLA	Fabry's disease (MIM 301500)	X
KCNH2	Long QT syndrome 2 (MIM 613688)	Y
KCNQ1	Long QT syndrome 1 (MIM 192500)	Y
LDLR	Familial hypercholesterolemia (MIM 143890)	Y
LMNA	Dilated cardiomyopathy 1A (MIM 115200)	Y
MEN1	Multiple endocrine neoplasia, type 1 (MIM 131100)	Y
MLH1	Lynch syndrome (MIM 120435)	Y
MSH2	Lynch syndrome (MIM 120435)	Y
MSH6	Lynch syndrome (MIM 120435)	Y
MUTYH	MYH-associated polyposis (MIM 608456); Pilomatrixoma (MIM 132600)	Y
MYBPC3	Dilated cardiomyopathy 1A (MIM 115200); Familial hypertrophic cardiomyopathy 4 (MIM 115197)	Y
MYH11	Aortic aneurysm, familial thoracic 4 (MIM 132900)	Y
MYH7	Familial hypertrophic cardiomyopathy 1 (MIM 192600)	Y
MYL2	Familial hypertrophic cardiomyopathy 10 (MIM 608758)	Y
MYL3	Familial hypertrophic cardiomyopathy 8 (MIM 608751)	Y
NF2	Neurofibromatosis, type 2 (MIM 101000)	Y
PCSK9	Hypercholesterolemia, autosomal dominant, 3 (MIM 603776)	Y
PKP2	Arrhythmogenic right ventricular cardiomyopathy, type 9 (MIM 609040)	Y
PMS2	Lynch syndrome (MIM 120435)	Y
PRKAG2	Familial hypertrophic cardiomyopathy 6 (MIM 600858)	Y
PTEN	PTEN hamartoma tumor syndrome (MIM 153480)	Y
RB1	Retinoblastoma (MIM 180200)	Y
RET	Familial medullary thyroid carcinoma (MIM 155240); Multiple endocrine neoplasia, type 2a (MIM 171400); Multiple endocrine neoplasia, type 2b (MIM 162300)	Y
RYR1	Malignant hyperthermia (MIM 145600)	Y
RYR2	Catecholaminergic polymorphic ventricular tachycardia (MIM 604772)	Y
SCN5A	Brugada syndrome 1 (MIM 601144); Long QT syndrome 3 (MIM 603830)	Y
SDHAF2	Paragangliomas 2 (MIM 601650)	Y
SDHB	Paragangliomas 4 (MIM 115310)	Y
SDHC	Paragangliomas 3 (MIM 605373)	Y
SDHD	Paragangliomas 1 (MIM 168000)	Y
SMAD3	Loeys-Dietz syndrome type 3 (MIM 613795)	Y
STK11	Peutz-Jeghers syndrome (MIM 175200)	Y
TGFBR1	Loeys-Dietz syndrome type 1A (MIM 609192); Loeys-Dietz syndrome type 2A (MIM 608967); Marfan's syndrome (MIM 154700)	Y
TGFBR2	Loeys-Dietz syndrome type 1B (MIM 610168); Loeys-Dietz syndrome type 2B (MIM 610380)	Y
TMEM43	Arrhythmogenic right ventricular cardiomyopathy, type 5 (MIM 604400)	Y
TNNI3	Familial hypertrophic cardiomyopathy 7 (MIM 613690)	Y
TNNT2	Left ventricular noncompaction 6 (MIM 601494)	Y
TP53	Li-Fraumeni syndrome 1 (MIM 151623)	Y
TPM1	Familial hypertrophic cardiomyopathy 3 (MIM 115196)	Y
TSC1	Tuberous sclerosis 1 (MIM 191100)	Y
TSC2	Tuberous sclerosis 2 (MIM 613254)	Y
VHL	Von Hippel-Lindau syndrome (MIM 193300)	Y
WT1	Wilms' tumor (MIM 194070)	X
MYLK	*removed from ACMG59	Y

## Sheet: S2. phecode prev
phenotype	phecode	category	n_case	n_total	prevalence
Intestinal infection	008	infectious diseases	189	15181	0.0124498
Bacterial enteritis	008.5	infectious diseases	33	15181	0.00217377
Intestinal e.coli	008.51	infectious diseases	5	15181	0.000329359
Intestinal infection due to C. difficile	008.52	infectious diseases	192	15181	0.0126474
Viral Enteritis	008.6	infectious diseases	82	15181	0.00540149
Intestinal infection due to protozoa	008.7	infectious diseases	7	15181	0.000461103
Tuberculosis	010	infectious diseases	33	15181	0.00217377
Diseases due to other mycobacteria	031	infectious diseases	35	15181	0.00230551
Septicemia	038	infectious diseases	254	15181	0.0167314
Gram negative septicemia	038.1	infectious diseases	75	15181	0.00494039
Gram positive septicemia	038.2	infectious diseases	51	15181	0.00335946
Bacteremia	038.3	infectious diseases	210	15181	0.0138331
Bacterial infection NOS	041	infectious diseases	286	15181	0.0188393
Staphylococcus infections	041.1	infectious diseases	48	15181	0.00316185
Methicillin sensitive Staphylococcus aureus	041.11	infectious diseases	102	15181	0.00671892
Methicillin resistant Staphylococcus aureus	041.12	infectious diseases	137	15181	0.00902444
Streptococcus infection	041.2	infectious diseases	163	15181	0.0107371
Rheumatic fever / chorea	041.21	infectious diseases	8	15181	0.000526975
E. coli	041.4	infectious diseases	130	15181	0.00856334
H. pylori	041.8	infectious diseases	69	15181	0.00454516
Infection with drug-resistant microorganisms	041.9	infectious diseases	65	15181	0.00428167
Herpes zoster	053	infectious diseases	334	15181	0.0220012
Herpes zoster with nervous system complications	053.1	infectious diseases	69	15181	0.00454516
Herpes simplex	054	infectious diseases	419	15181	0.0276003
Viral hepatitis	070	infectious diseases	27	15181	0.00177854
Viral hepatitis A	070.1	infectious diseases	5	15181	0.000329359
Viral hepatitis B	070.2	infectious diseases	28	15181	0.00184441
Viral hepatitis C	070.3	infectious diseases	188	15181	0.0123839
Chronic hepatitis	070.4	infectious diseases	58	15181	0.00382057
Hepatitis NOS	070.9	infectious diseases	148	15181	0.00974903
Human immunodeficiency virus [HIV] disease	071	infectious diseases	43	15181	0.00283249
HIV infection, symptomatic	071.1	infectious diseases	53	15181	0.00349121
Viral warts & HPV	078	infectious diseases	989	15181	0.0651472
Viral infection	079	infectious diseases	1011	15181	0.0665964
Varicella infection	079.1	infectious diseases	20	15181	0.00131744
Infectious mononucleosis	079.2	infectious diseases	55	15181	0.00362295
Viremia, NOS	079.9	infectious diseases	95	15181	0.00625782
Postoperative infection	080	infectious diseases	319	15181	0.0210131
Infection/inflammation of internal prosthetic device; implant; and graft	081	infectious diseases	176	15181	0.0115934
Graft-versus-host disease	081.1	infectious diseases	19	15181	0.00125156
Acute graft-versus-host disease	081.11	infectious diseases	11	15181	0.00072459
Chronic graft-versus-host disease	081.12	infectious diseases	27	15181	0.00177854
Sexually transmitted infections (not HIV or hepatitis)	090	infectious diseases	48	15181	0.00316185
Gonococcal infections	090.2	infectious diseases	6	15181	0.000395231
Venereal diseases due to Chlamydia trachomatis	090.3	infectious diseases	9	15181	0.000592846
Burns	1000	NULL	217	15181	0.0142942
Foreign body injury	1001	NULL	318	15181	0.0209472
Symptoms concerning nutrition, metabolism, and development	1002	NULL	945	15181	0.0622489
Sudden death	1003	NULL	1	15181	6.58718e-05
Other signs and symptoms involving emotional state	1004	NULL	77	15181	0.00507213
Other symptoms	1005	NULL	645	15181	0.0424873
Crushing injury	1006	NULL	39	15181	0.002569
Injury to blood vessels	1007	NULL	30	15181	0.00197615
Crushing or internal injury to organs	1008	NULL	97	15181	0.00638957
Injury, NOS	1009	NULL	2089	15181	0.137606
Other tests	1010	NULL	10256	15181	0.675581
Complications of surgical and medical procedures	1011	NULL	377	15181	0.0248337
Late effect	1012	NULL	23	15181	0.00151505
Asphyxia and hypoxemia	1013	NULL	466	15181	0.0306963
Effects of heat, cold and air pressure	1014	NULL	26	15181	0.00171267
Effects of other external causes	1015	NULL	783	15181	0.0515776
Other ill-defined and unknown causes of morbidity and mortality	1019	NULL	605	15181	0.0398524
Dermatophytosis / Dermatomycosis	110	infectious diseases	5	15181	0.000329359
Dermatophytosis	110.1	infectious diseases	105	15181	0.00691654
Dermatophytosis of nail	110.11	infectious diseases	800	15181	0.0526975
Althete's foot	110.12	infectious diseases	252	15181	0.0165997
Dermatophytosis of the body	110.13	infectious diseases	260	15181	0.0171267
Dermatomycoses	110.2	infectious diseases	62	15181	0.00408405
Family history	1100	NULL	253	15181	0.0166656
Candidiasis	112	infectious diseases	740	15181	0.0487451
Candidiasis of skin and nails	112.3	infectious diseases	118	15181	0.00777287
Mycoses	117	infectious diseases	46	15181	0.0030301
Histoplasmosis	117.1	infectious diseases	22	15181	0.00144918
Coccidioidomycosis	117.2	infectious diseases	1	15181	6.58718e-05
Blastomycotic infection	117.3	infectious diseases	3	15181	0.000197615
Aspergillosis	117.4	infectious diseases	31	15181	0.00204203
Spirochetal infection	130	infectious diseases	10	15181	0.000658718
Lyme disease	130.1	infectious diseases	96	15181	0.00632369
Protozoan infection	131	infectious diseases	13	15181	0.000856334
Infestation (lice, mites)	132	infectious diseases	42	15181	0.00276662
Pediculosis and phthirus infestation	132.1	infectious diseases	34	15181	0.00223964
Arthropod-borne diseases	133	infectious diseases	8	15181	0.000526975
Helminthiases	134	infectious diseases	5	15181	0.000329359
Intestinal helminthiases	134.1	infectious diseases	12	15181	0.000790462
Other infectious and parasitic diseases	136	infectious diseases	202	15181	0.0133061
Cancer of mouth	145	neoplasms	25	15181	0.0016468
Cancer of lip	145.1	neoplasms	2	15181	0.000131744
Cancer of tongue	145.2	neoplasms	31	15181	0.00204203
Cancer of major salivary glands	145.3	neoplasms	15	15181	0.000988077
Cancer of the gums	145.4	neoplasms	2	15181	0.000131744
Cancer of the mouth floor	145.5	neoplasms	3	15181	0.000197615
Cancer of larynx, pharynx, nasal cavities	149	neoplasms	4	15181	0.000263487
Cancer of oropharynx	149.1	neoplasms	25	15181	0.0016468
Cancer of nasopharynx	149.2	neoplasms	4	15181	0.000263487
Cancer of hypopharynx	149.3	neoplasms	3	15181	0.000197615
Cancer of larynx	149.4	neoplasms	18	15181	0.00118569
Hx of malignant neoplasm of oral cavity and pharynx	149.5	neoplasms	34	15181	0.00223964
Cancer of of nasal cavities	149.9	neoplasms	5	15181	0.000329359
Cancer of esophagus	150	neoplasms	28	15181	0.00184441
Cancer of stomach	151	neoplasms	30	15181	0.00197615
Colorectal cancer	153	neoplasms	18	15181	0.00118569
Colon cancer	153.2	neoplasms	622	15181	0.0409723
Malignant neoplasm of rectum, rectosigmoid junction, and anus	153.3	neoplasms	243	15181	0.0160069
Cancer of liver and intrahepatic bile duct	155	neoplasms	44	15181	0.00289836
Malignant neoplasm of liver, primary	155.1	neoplasms	46	15181	0.0030301
Pancreatic cancer	157	neoplasms	80	15181	0.00526975
Neoplasm of unspecified nature of digestive system	158	neoplasms	124	15181	0.0081681
Malignant neoplasm of other and ill-defined sites within the digestive organs and peritoneum	159	neoplasms	77	15181	0.00507213
Malignant neoplasm of small intestine, including duodenum	159.2	neoplasms	21	15181	0.00138331
Malignant neoplasm of gallbladder and extrahepatic bile ducts	159.3	neoplasms	14	15181	0.000922205
Malignant neoplasm of retroperitoneum and peritoneum	159.4	neoplasms	28	15181	0.00184441
Cancer of intrathoracic organs	164	neoplasms	13	15181	0.000856334
Cancer within the respiratory system	165	neoplasms	21	15181	0.00138331
Cancer of bronchus; lung	165.1	neoplasms	234	15181	0.015414
Cancer of bone and connective tissue	170	neoplasms	0	15181	0
Bone cancer	170.1	neoplasms	42	15181	0.00276662
Cancer of connective tissue	170.2	neoplasms	100	15181	0.00658718
Skin cancer	172	neoplasms	0	15181	0
Melanomas of skin, dx or hx	172.1	neoplasms	240	15181	0.0158092
Melanomas of skin	172.11	neoplasms	259	15181	0.0170608
Other non-epithelial cancer of skin	172.2	neoplasms	1196	15181	0.0787827
Basal cell carcinoma	172.21	neoplasms	531	15181	0.0349779
Squamous cell carcinoma	172.22	neoplasms	265	15181	0.017456
Carcinoma in situ of skin	172.3	neoplasms	204	15181	0.0134378
Neoplasm of uncertain behavior of skin	173	neoplasms	1127	15181	0.0742375
Breast cancer	174	neoplasms	7	15181	0.000461103
Breast cancer [female]	174.1	neoplasms	208	15181	0.0137013
Malignant neoplasm of female breast	174.11	neoplasms	796	15181	0.052434
Breast cancer [male]	174.2	neoplasms	19	15181	0.00125156
Neoplasm of uncertain behavior of breast	174.3	neoplasms	20	15181	0.00131744
Acquired absence of breast	175	neoplasms	721	15181	0.0474936
Cervical cancer and dysplasia	180	neoplasms	1	15181	6.58718e-05
Cervical cancer	180.1	neoplasms	57	15181	0.00375469
Cervical intraepithelial neoplasia [CIN] [Cervical dysplasia]	180.3	neoplasms	198	15181	0.0130426
Malignant neoplasm of uterus	182	neoplasms	122	15181	0.00803636
Cancer of other female genital organs	184	neoplasms	20	15181	0.00131744
Malignant neoplasm of ovary and other uterine adnexa	184.1	neoplasms	30	15181	0.00197615
Malignant neoplasm of ovary	184.11	neoplasms	75	15181	0.00494039
Cancer of other female genital organs (excluding uterus and ovary)	184.2	neoplasms	28	15181	0.00184441
Cancer of prostate	185	neoplasms	515	15181	0.033924
Cancer of other male genital organs	187	neoplasms	1	15181	6.58718e-05
Malignant neoplasm of unspecified male genital organ	187.1	neoplasms	7	15181	0.000461103
Malignant neoplasm of testis	187.2	neoplasms	27	15181	0.00177854
Neoplasm of uncertain behavior of male genital organs	187.8	neoplasms	13	15181	0.000856334
Cancer of urinary organs (incl. kidney and bladder)	189	neoplasms	0	15181	0
Cancer of kidney and renal pelvis	189.1	neoplasms	81	15181	0.00533562
Malignant neoplasm of kidney, except pelvis	189.11	neoplasms	124	15181	0.0081681
Malignant neoplasm of renal pelvis	189.12	neoplasms	24	15181	0.00158092
Cancer of bladder	189.2	neoplasms	63	15181	0.00414992
Malignant neoplasm of bladder	189.21	neoplasms	170	15181	0.0111982
Malignant neoplasm of other urinary organs	189.4	neoplasms	46	15181	0.0030301
Cancer of eye	190	neoplasms	27	15181	0.00177854
Manlignant and unknown neoplasms of brain and nervous system	191	neoplasms	69	15181	0.00454516
Cancer of brain and nervous system	191.1	neoplasms	23	15181	0.00151505
Cancer of brain	191.11	neoplasms	75	15181	0.00494039
Thyroid cancer	193	neoplasms	197	15181	0.0129767
Cancer of other endocrine glands	194	neoplasms	16	15181	0.00105395
Cancer, suspected or other	195	neoplasms	192	15181	0.0126474
Malignant neoplasm, other	195.1	neoplasms	315	15181	0.0207496
Malignant neoplasm of head, face, and neck	195.3	neoplasms	36	15181	0.00237139
Radiotherapy	196	neoplasms	253	15181	0.0166656
Chemotherapy	197	neoplasms	780	15181	0.05138
Secondary malignant neoplasm	198	neoplasms	216	15181	0.0142283
Secondary malignancy of lymph nodes	198.1	neoplasms	333	15181	0.0219353
Secondary malignancy of respiratory organs	198.2	neoplasms	150	15181	0.00988077
Secondary malignant neoplasm of digestive systems	198.3	neoplasms	92	15181	0.00606021
Secondary malignant neoplasm of liver	198.4	neoplasms	136	15181	0.00895857
Secondary malignancy of brain/spine	198.5	neoplasms	81	15181	0.00533562
Secondary malignancy of bone	198.6	neoplasms	153	15181	0.0100784
Secondary malignant neoplasm of skin	198.7	neoplasms	14	15181	0.000922205
Neoplasm of uncertain behavior	199	neoplasms	890	15181	0.0586259
Neurofibromatosis	199.4	neoplasms	35	15181	0.00230551
Myeloproliferative disease	200	neoplasms	131	15181	0.00862921
Polycythemia vera	200.1	neoplasms	60	15181	0.00395231
Hodgkin's disease	201	neoplasms	53	15181	0.00349121
Cancer of other lymphoid, histiocytic tissue	202	neoplasms	67	15181	0.00441341
Non-Hodgkins lymphoma	202.2	neoplasms	197	15181	0.0129767
Nodular lymphoma	202.21	neoplasms	43	15181	0.00283249
Reticulosarcoma	202.22	neoplasms	32	15181	0.0021079
Lymphosarcoma	202.23	neoplasms	16	15181	0.00105395
Large cell lymphoma	202.24	neoplasms	26	15181	0.00171267
Leukemia	204	neoplasms	54	15181	0.00355708
Lymphoid leukemia	204.1	neoplasms	33	15181	0.00217377
Lymphoid leukemia, acute	204.11	neoplasms	31	15181	0.00204203
Lymphoid leukemia, chronic	204.12	neoplasms	74	15181	0.00487451
Myeloid leukemia	204.2	neoplasms	16	15181	0.00105395
Myeloid leukemia, acute	204.21	neoplasms	37	15181	0.00243726
Myeloid leukemia, chronic	204.22	neoplasms	19	15181	0.00125156
Monocytic leukemia	204.3	neoplasms	6	15181	0.000395231
Multiple myeloma	204.4	neoplasms	61	15181	0.00401818
Benign neoplasm of colon	208	neoplasms	3493	15181	0.23009
Neuroendocrine tumors	209	neoplasms	36	15181	0.00237139
Benign neoplasm of lip, oral cavity, and pharynx	210	neoplasms	70	15181	0.00461103
Benign neoplasm of other parts of digestive system	211	neoplasms	241	15181	0.0158751
Benign neoplasm of respiratory and intrathoracic organs	212	neoplasms	46	15181	0.0030301
Benign neoplasm of bone and articular cartilage	213	neoplasms	66	15181	0.00434754
Lipoma	214	neoplasms	212	15181	0.0139648
Lipoma of skin and subcutaneous tissue	214.1	neoplasms	185	15181	0.0121863
Other benign neoplasm of connective and other soft tissue	215	neoplasms	174	15181	0.0114617
Benign neoplasm of skin	216	neoplasms	2863	15181	0.188591
Screening for malignant neoplasms of the skin	216.1	neoplasms	2974	15181	0.195903
Vascular hamartomas and non-neoplastic nevi	217	neoplasms	27	15181	0.00177854
Nevus, non-neoplastic	217.1	neoplasms	358	15181	0.0235821
Benign neoplasm of uterus	218	neoplasms	0	15181	0
Uterine leiomyoma	218.1	neoplasms	649	15181	0.0427508
Other benign neoplasm of uterus	218.2	neoplasms	23	15181	0.00151505
Benign neoplasm of ovary	220	neoplasms	74	15181	0.00487451
Benign neoplasm of other female genital organs	221	neoplasms	13	15181	0.000856334
Benign neoplasm of male genital organs	222	neoplasms	15	15181	0.000988077
Benign neoplasm of kidney and other urinary organs	223	neoplasms	43	15181	0.00283249
Benign neoplasm of eye	224	neoplasms	24	15181	0.00158092
Benign neoplasm of eye, uveal	224.1	neoplasms	148	15181	0.00974903
Benign neoplasm of brain and other parts of nervous system	225	neoplasms	4	15181	0.000263487
Benign neoplasm of brain, cranial nerves, meninges	225.1	neoplasms	123	15181	0.00810223
Benign neoplasm of spinal cord, meninges	225.2	neoplasms	6	15181	0.000395231
Benign neoplasm of thyroid glands	226	neoplasms	47	15181	0.00309598
Benign neoplasm of other endocrine glands and related structures	227	neoplasms	2	15181	0.000131744
Benign neoplasm of adrenal gland	227.1	neoplasms	90	15181	0.00592846
Benign neoplasm of parathyroid gland	227.2	neoplasms	34	15181	0.00223964
Benign neoplasm of pituitary gland and craniopharyngeal duct (pouch)	227.3	neoplasms	88	15181	0.00579672
Hemangioma and lymphangioma, any site	228	neoplasms	168	15181	0.0110665
Hemangioma of skin and subcutaneous tissue	228.1	neoplasms	168	15181	0.0110665
Benign neoplasm of unspecified sites	229	neoplasms	72	15181	0.00474277
Benign neoplasm of lymph nodes	229.1	neoplasms	4	15181	0.000263487
Kaposi's sarcoma	230	neoplasms	2	15181	0.000131744
Simple and unspecified goiter	240	endocrine/metabolic	218	15181	0.0143601
Nontoxic nodular goiter	241	endocrine/metabolic	89	15181	0.00586259
Nontoxic uninodular goiter	241.1	endocrine/metabolic	650	15181	0.0428167
Nontoxic multinodular goiter	241.2	endocrine/metabolic	458	15181	0.0301693
Thyrotoxicosis with or without goiter	242	endocrine/metabolic	251	15181	0.0165338
Graves' disease	242.1	endocrine/metabolic	138	15181	0.00909031
Toxic multinodular goiter	242.2	endocrine/metabolic	36	15181	0.00237139
Exophthalmos	242.3	endocrine/metabolic	35	15181	0.00230551
Thyrotoxic exophthalmos	242.31	endocrine/metabolic	5	15181	0.000329359
Hypothyroidism	244	endocrine/metabolic	13	15181	0.000856334
Secondary hypothyroidism	244.1	endocrine/metabolic	328	15181	0.021606
Acquired hypothyroidism	244.2	endocrine/metabolic	387	15181	0.0254924
Iodine hypothyroidism	244.3	endocrine/metabolic	13	15181	0.000856334
Hypothyroidism NOS	244.4	endocrine/metabolic	2311	15181	0.15223
Congenital hypothyroidism	244.5	endocrine/metabolic	18	15181	0.00118569
Thyroiditis	245	endocrine/metabolic	68	15181	0.00447928
Thyroiditis, acute and subacute	245.1	endocrine/metabolic	17	15181	0.00111982
Chronic thyroiditis	245.2	endocrine/metabolic	5	15181	0.000329359
Chronic lymphocytic thyroiditis	245.21	endocrine/metabolic	282	15181	0.0185759
Other disorders of thyroid	246	endocrine/metabolic	301	15181	0.0198274
Thyroid cyst	246.2	endocrine/metabolic	23	15181	0.00151505
Abnormal results of function study of thyroid	246.7	endocrine/metabolic	297	15181	0.0195639
Secondary diabetes mellitus	249	endocrine/metabolic	121	15181	0.00797049
Diabetes mellitus	250	endocrine/metabolic	282	15181	0.0185759
Type 1 diabetes	250.1	endocrine/metabolic	419	15181	0.0276003
Type 1 diabetes with ketoacidosis	250.11	endocrine/metabolic	38	15181	0.00250313
Type 1 diabetes with renal manifestations	250.12	endocrine/metabolic	51	15181	0.00335946
Type 1 diabetes with ophthalmic manifestations	250.13	endocrine/metabolic	75	15181	0.00494039
Type 1 diabetes with neurological manifestations	250.14	endocrine/metabolic	94	15181	0.00619195
Diabetes type 1 with peripheral circulatory disorders	250.15	endocrine/metabolic	14	15181	0.000922205
Type 2 diabetes	250.2	endocrine/metabolic	2514	15181	0.165602
Type 2 diabetes with ketoacidosis	250.21	endocrine/metabolic	25	15181	0.0016468
Type 2 diabetes with renal manifestations	250.22	endocrine/metabolic	501	15181	0.0330018
Type 2 diabetes with ophthalmic manifestations	250.23	endocrine/metabolic	224	15181	0.0147553
Type 2 diabetes with neurological manifestations	250.24	endocrine/metabolic	659	15181	0.0434095
Diabetes type 2 with peripheral circulatory disorders	250.25	endocrine/metabolic	150	15181	0.00988077
Insulin pump user	250.3	endocrine/metabolic	646	15181	0.0425532
Abnormal glucose	250.4	endocrine/metabolic	32	15181	0.0021079
Impaired fasting glucose	250.41	endocrine/metabolic	1368	15181	0.0901126
Other abnormal glucose	250.42	endocrine/metabolic	1604	15181	0.105658
Glycosuria or Acetonuria	250.5	endocrine/metabolic	19	15181	0.00125156
Polyneuropathy in diabetes	250.6	endocrine/metabolic	397	15181	0.0261511
Diabetic retinopathy	250.7	endocrine/metabolic	256	15181	0.0168632
Other disorders of pancreatic internal secretion	251	endocrine/metabolic	59	15181	0.00388644
Hypoglycemia	251.1	endocrine/metabolic	237	15181	0.0156116
Abnormality of secretion of glucagon or gastrin	251.8	endocrine/metabolic	1	15181	6.58718e-05
Disorders of parathyroid gland	252	endocrine/metabolic	33	15181	0.00217377
Hyperparathyroidism	252.1	endocrine/metabolic	304	15181	0.020025
Hypoparathyroidism	252.2	endocrine/metabolic	36	15181	0.00237139
Disorders of the pituitary gland and its hypothalamic control	253	endocrine/metabolic	82	15181	0.00540149
Pituitary hyperfunction	253.1	endocrine/metabolic	78	15181	0.005138
Acromegaly and gigantism	253.11	endocrine/metabolic	15	15181	0.000988077
Pituitary hypofunction	253.2	endocrine/metabolic	84	15181	0.00553323
Diabetes insipidus	253.3	endocrine/metabolic	19	15181	0.00125156
Anterior pituitary disorders	253.4	endocrine/metabolic	45	15181	0.00296423
Pituitary dwarfism	253.5	endocrine/metabolic	48	15181	0.00316185
Other disorders of neurohypophysis	253.7	endocrine/metabolic	27	15181	0.00177854
Diseases of thymus gland	254	endocrine/metabolic	1	15181	6.58718e-05
Disorders of adrenal glands	255	endocrine/metabolic	127	15181	0.00836572
Adrenal hyperfunction	255.1	endocrine/metabolic	12	15181	0.000790462
Cushing's syndrome	255.11	endocrine/metabolic	30	15181	0.00197615
Hyperaldosteronism	255.12	endocrine/metabolic	16	15181	0.00105395
Medulloadrenal hyperfunction	255.13	endocrine/metabolic	2	15181	0.000131744
Adrenal hypofunction	255.2	endocrine/metabolic	29	15181	0.00191028
Glucocorticoid deficiency	255.21	endocrine/metabolic	136	15181	0.00895857
Mineralocorticoid deficiency	255.22	endocrine/metabolic	4	15181	0.000263487
Adrenogenital disorders	255.3	endocrine/metabolic	5	15181	0.000329359
Ovarian dysfunction	256	endocrine/metabolic	26	15181	0.00171267
Hyperestrogenism	256.1	endocrine/metabolic	5	15181	0.000329359
Polycystic ovaries	256.4	endocrine/metabolic	176	15181	0.0115934
Testicular dysfunction	257	endocrine/metabolic	26	15181	0.00171267
Testicular hypofunction	257.1	endocrine/metabolic	309	15181	0.0203544
Iatrogenic endocrine disorders	258	endocrine/metabolic	10	15181	0.000658718
Postablative ovarian failure	258.1	endocrine/metabolic	11	15181	0.00072459
Other endocrine disorders	259	endocrine/metabolic	95	15181	0.00625782
Nonspecific abnormal results of other endocrine function study	259.1	endocrine/metabolic	28	15181	0.00184441
Carcinoid syndrome	259.2	endocrine/metabolic	15	15181	0.000988077
Delay in sexual development and puberty NEC	259.3	endocrine/metabolic	35	15181	0.00230551
Precocious sexual development and puberty NEC	259.4	endocrine/metabolic	35	15181	0.00230551
Polyglandular activity in multiple endocrine adenomatosis	259.8	endocrine/metabolic	9	15181	0.000592846
Protein-calorie malnutrition	260	endocrine/metabolic	347	15181	0.0228575
Cachexia	260.1	endocrine/metabolic	22	15181	0.00144918
severe protein-calorie malnutrition	260.2	endocrine/metabolic	98	15181	0.00645544
Kwashiorkor	260.21	endocrine/metabolic	4	15181	0.000263487
Nutritional marasmus	260.22	endocrine/metabolic	13	15181	0.000856334
Adult failure to thrive	260.3	endocrine/metabolic	64	15181	0.0042158
Anorexia	260.6	endocrine/metabolic	128	15181	0.00843159
Polyphagia	260.7	endocrine/metabolic	14	15181	0.000922205
Vitamin deficiency	261	endocrine/metabolic	84	15181	0.00553323
Vitamin A deficiency	261.1	endocrine/metabolic	6	15181	0.000395231
Vitamin B-complex deficiencies	261.2	endocrine/metabolic	431	15181	0.0283908
Vitamin C deficiencies	261.3	endocrine/metabolic	3	15181	0.000197615
Vitamin D deficiency	261.4	endocrine/metabolic	2037	15181	0.134181
Rickets or osteomalacia	261.41	endocrine/metabolic	18	15181	0.00118569
Mineral deficiency NEC	262	endocrine/metabolic	100	15181	0.00658718
Other nutritional deficiency	263	endocrine/metabolic	165	15181	0.0108688
Lack of normal physiological development	264	endocrine/metabolic	6	15181	0.000395231
Short stature	264.1	endocrine/metabolic	143	15181	0.00941967
Failure to thrive (childhood)	264.2	endocrine/metabolic	134	15181	0.00882682
Delayed milestones	264.3	endocrine/metabolic	116	15181	0.00764113
Lack of normal physiological development, unspecified	264.9	endocrine/metabolic	205	15181	0.0135037
Proteinuria	269	endocrine/metabolic	375	15181	0.0247019
Disorders of protein plasma/amino-acid transport and metabolism	270	endocrine/metabolic	0	15181	0
Disturbances of amino-acid transport	270.1	endocrine/metabolic	8	15181	0.000526975
Disturbances of sulphur-bearing amino-acid metabolism	270.11	endocrine/metabolic	50	15181	0.00329359
Phenylketonuria [PKU]	270.12	endocrine/metabolic	2	15181	0.000131744
Disorders of amino-acid metabolism	270.2	endocrine/metabolic	8	15181	0.000526975
Disorders of urea cycle metabolism	270.21	endocrine/metabolic	10	15181	0.000658718
Disorders of plasma protein metabolism	270.3	endocrine/metabolic	20	15181	0.00131744
Polyclonal hypergammaglobulinemia	270.31	endocrine/metabolic	17	15181	0.00111982
Paraproteinemia	270.32	endocrine/metabolic	158	15181	0.0104077
Amyloidosis	270.33	endocrine/metabolic	43	15181	0.00283249
Alpha-1-antitrypsin deficiency	270.34	endocrine/metabolic	13	15181	0.000856334
Macroglobulinemia	270.35	endocrine/metabolic	15	15181	0.000988077
Other specified disorders of plasma protein metabolism	270.38	endocrine/metabolic	50	15181	0.00329359
Intestinal disaccharidase deficiencies and disaccharide malabsorption	271.3	endocrine/metabolic	280	15181	0.0184441
Other disorders of carbohydrate transport and metabolism	271.9	endocrine/metabolic	34	15181	0.00223964
Disorders of lipoid metabolism	272	endocrine/metabolic	211	15181	0.013899
Hyperlipidemia	272.1	endocrine/metabolic	6549	15181	0.431395
Hypercholesterolemia	272.11	endocrine/metabolic	3323	15181	0.218892
Hyperglyceridemia	272.12	endocrine/metabolic	591	15181	0.0389302
Mixed hyperlipidemia	272.13	endocrine/metabolic	1816	15181	0.119623
Hyperchylomicronemia	272.14	endocrine/metabolic	2	15181	0.000131744
Unspecified disorder of lipoid metabolism	272.9	endocrine/metabolic	183	15181	0.0120545
Gout and other crystal arthropathies	274	endocrine/metabolic	0	15181	0
Gout	274.1	endocrine/metabolic	642	15181	0.0422897
Gouty arthropathy	274.11	endocrine/metabolic	301	15181	0.0198274
Crystal arthropathies	274.2	endocrine/metabolic	18	15181	0.00118569
Chondrocalcinosis	274.21	endocrine/metabolic	87	15181	0.00573085
Disorders of mineral metabolism	275	endocrine/metabolic	16	15181	0.00105395
Disorders of iron metabolism	275.1	hematopoietic	66	15181	0.00434754
Hereditary hemochromatosis	275.11	hematopoietic	21	15181	0.00138331
Disorders of copper metabolism	275.2	endocrine/metabolic	6	15181	0.000395231
Disorders of magnesium metabolism	275.3	endocrine/metabolic	213	15181	0.0140307
Disorders of calcium/phosphorus metabolism	275.5	endocrine/metabolic	160	15181	0.0105395
Hypocalcemia	275.51	endocrine/metabolic	120	15181	0.00790462
Disorders of phosphorus metabolism	275.53	endocrine/metabolic	135	15181	0.00889269
Hypercalcemia	275.6	endocrine/metabolic	359	15181	0.023648
Disorders of fluid, electrolyte, and acid-base balance	276	endocrine/metabolic	2	15181	0.000131744
Electrolyte imbalance	276.1	endocrine/metabolic	154	15181	0.0101443
Hyperosmolality and/or hypernatremia	276.11	endocrine/metabolic	65	15181	0.00428167
Hyposmolality and/or hyponatremia	276.12	endocrine/metabolic	512	15181	0.0337264
Hyperpotassemia	276.13	endocrine/metabolic	560	15181	0.0368882
Hypopotassemia	276.14	endocrine/metabolic	864	15181	0.0569132
Acid-base balance disorder	276.4	endocrine/metabolic	9	15181	0.000592846
Acidosis	276.41	endocrine/metabolic	297	15181	0.0195639
Alkalosis	276.42	endocrine/metabolic	37	15181	0.00243726
Hypovolemia	276.5	endocrine/metabolic	923	15181	0.0607997
Fluid overload	276.6	endocrine/metabolic	327	15181	0.0215401
Polydipsia	276.8	endocrine/metabolic	40	15181	0.00263487
Other disorders of metabolism	277	endocrine/metabolic	152	15181	0.0100125
Disorders of porphyrin metabolism	277.1	endocrine/metabolic	5	15181	0.000329359
Other disorders of purine and pyrimidine metabolism	277.2	endocrine/metabolic	1	15181	6.58718e-05
Disorders of bilirubin excretion	277.4	endocrine/metabolic	69	15181	0.00454516
Other disorders of lipoid metabolism	277.5	endocrine/metabolic	141	15181	0.00928793
Lipoprotein disorders	277.51	endocrine/metabolic	186	15181	0.0122522
Other deficiencies of circulating enzymes	277.6	endocrine/metabolic	4	15181	0.000263487
Dysmetabolic syndrome X	277.7	endocrine/metabolic	266	15181	0.0175219
Carnitine deficiencies	277.8	endocrine/metabolic	2	15181	0.000131744
Overweight, obesity and other hyperalimentation	278	endocrine/metabolic	963	15181	0.0634346
Obesity	278.1	endocrine/metabolic	3521	15181	0.231935
Morbid obesity	278.11	endocrine/metabolic	1810	15181	0.119228
Localized adiposity	278.3	endocrine/metabolic	54	15181	0.00355708
Abnormal weight gain	278.4	endocrine/metabolic	731	15181	0.0481523
Disorders involving the immune mechanism	279	endocrine/metabolic	268	15181	0.0176536
Immunity deficiency	279.1	endocrine/metabolic	250	15181	0.016468
Deficiency of humoral immunity	279.11	endocrine/metabolic	133	15181	0.00876095
Autoimmune disease NEC	279.2	endocrine/metabolic	87	15181	0.00573085
Other immunological findings	279.7	endocrine/metabolic	270	15181	0.0177854
Other specified disorders involving the immune mechanism	279.8	endocrine/metabolic	22	15181	0.00144918
Iron deficiency anemias	280	hematopoietic	9	15181	0.000592846
Iron deficiency anemias, unspecified or not due to blood loss	280.1	hematopoietic	1261	15181	0.0830644
Iron deficiency anemia secondary to blood loss (chronic)	280.2	hematopoietic	263	15181	0.0173243
Other deficiency anemia	281	hematopoietic	7	15181	0.000461103
Megaloblastic anemia	281.1	hematopoietic	3	15181	0.000197615
Pernicious anemia	281.11	hematopoietic	73	15181	0.00480864
Other vitamin B12 deficiency anemia	281.12	hematopoietic	124	15181	0.0081681
Folate-deficiency anemia	281.13	hematopoietic	6	15181	0.000395231
Deficiency anemias	281.9	hematopoietic	102	15181	0.00671892
Hereditary hemolytic anemias	282	hematopoietic	0	15181	0
Sickle cell anemia	282.5	hematopoietic	4	15181	0.000263487
Other hemoglobinopathies	282.8	hematopoietic	24	15181	0.00158092
Other hereditary hemolytic anemias	282.9	hematopoietic	15	15181	0.000988077
Acquired hemolytic anemias	283	hematopoietic	17	15181	0.00111982
Autoimmune hemolytic anemias	283.1	hematopoietic	16	15181	0.00105395
Non-autoimmune hemolytic anemias	283.2	hematopoietic	4	15181	0.000263487
Hemolytic-uremic syndrome	283.21	hematopoietic	3	15181	0.000197615
Aplastic anemia	284	hematopoietic	38	15181	0.00250313
Pancytopenia	284.1	hematopoietic	145	15181	0.00955141
Constitutional aplastic anemia	284.2	hematopoietic	2	15181	0.000131744
Other anemias	285	hematopoietic	2433	15181	0.160266
Acute posthemorrhagic anemia	285.1	hematopoietic	589	15181	0.0387985
Anemia of chronic disease	285.2	hematopoietic	89	15181	0.00586259
Anemia in chronic kidney disease	285.21	hematopoietic	277	15181	0.0182465
Anemia in neoplastic disease	285.22	hematopoietic	127	15181	0.00836572
Sideroblastic anemia	285.3	hematopoietic	2	15181	0.000131744
Hemoglobinuria	285.8	hematopoietic	9	15181	0.000592846
Coagulation defects	286	hematopoietic	10	15181	0.000658718
Congenital coagulation defects	286.1	hematopoietic	5	15181	0.000329359
Von willebrand's disease	286.11	hematopoietic	24	15181	0.00158092
Congenital deficiency of other clotting factors (including factor VII)	286.12	hematopoietic	35	15181	0.00230551
Congenital factor VIII disorder	286.13	hematopoietic	9	15181	0.000592846
Encounter for long-term (current) use of anticoagulants	286.2	hematopoietic	1470	15181	0.0968316
Coagulation defects complicating pregnancy or postpartum	286.3	hematopoietic	19	15181	0.00125156
Acquired coagulation factor deficiency	286.4	hematopoietic	12	15181	0.000790462
Hemorrhagic disorder due to intrinsic circulating anticoagulants	286.5	hematopoietic	60	15181	0.00395231
Defibrination syndrome	286.6	hematopoietic	5	15181	0.000329359
Other and unspecified coagulation defects	286.7	hematopoietic	240	15181	0.0158092
Hypercoagulable state	286.8	hematopoietic	11	15181	0.00072459
Primary hypercoagulable state	286.81	hematopoietic	154	15181	0.0101443
Abnormal coagulation profile	286.9	hematopoietic	150	15181	0.00988077
Purpura and other hemorrhagic conditions	287	hematopoietic	68	15181	0.00447928
Spontaneous ecchymoses	287.1	hematopoietic	52	15181	0.00342533
Allergic purpura	287.2	hematopoietic	11	15181	0.00072459
Thrombocytopenia	287.3	hematopoietic	474	15181	0.0312232
Primary thrombocytopenia	287.31	hematopoietic	76	15181	0.00500626
Secondary thrombocytopenia	287.32	hematopoietic	74	15181	0.00487451
Qualitative platelet defects	287.4	hematopoietic	15	15181	0.000988077
Diseases of white blood cells	288	hematopoietic	128	15181	0.00843159
Decreased white blood cell count	288.1	hematopoietic	150	15181	0.00988077
Neutropenia	288.11	hematopoietic	302	15181	0.0198933
Elevated white blood cell count	288.2	hematopoietic	494	15181	0.0325407
Eosinophilia	288.3	hematopoietic	73	15181	0.00480864
Other diseases of blood and blood-forming organs	289	hematopoietic	166	15181	0.0109347
Myelofibrosis	289.1	hematopoietic	4	15181	0.000263487
Personal history of diseases of blood and blood-forming organs	289.3	hematopoietic	50	15181	0.00329359
Lymphadenitis	289.4	hematopoietic	864	15181	0.0569132
Diseases of spleen	289.5	hematopoietic	60	15181	0.00395231
Polycythemia, secondary	289.8	hematopoietic	76	15181	0.00500626
Abnormality of red blood cells	289.9	hematopoietic	41	15181	0.00270074
Delirium dementia and amnestic and other cognitive disorders	290	mental disorders	32	15181	0.0021079
Dementias	290.1	mental disorders	132	15181	0.00869508
Alzheimer's disease	290.11	mental disorders	63	15181	0.00414992
Dementia with cerebral degenerations	290.12	mental disorders	17	15181	0.00111982
Senile dementia	290.13	mental disorders	9	15181	0.000592846
Vascular dementia	290.16	mental disorders	21	15181	0.00138331
Delirium due to conditions classified elsewhere	290.2	mental disorders	91	15181	0.00599434
Other persistent mental disorders due to conditions classified elsewhere	290.3	mental disorders	230	15181	0.0151505
Other specified nonpsychotic and/or transient mental disorders	291	mental disorders	1	15181	6.58718e-05
Transient mental disorders due to conditions classified elsewhere	291.1	mental disorders	21	15181	0.00138331
Specific nonpsychotic mental disorders due to brain damage	291.4	mental disorders	125	15181	0.00823398
Alteration of consciousness	291.8	mental disorders	173	15181	0.0113958
Neurological disorders	292	mental disorders	159	15181	0.0104736
Aphasia/speech disturbance	292.1	mental disorders	328	15181	0.021606
Aphasia	292.11	mental disorders	103	15181	0.0067848
Symbolic dysfunction	292.12	mental disorders	67	15181	0.00441341
Mild cognitive impairment	292.2	mental disorders	123	15181	0.00810223
Memory loss	292.3	mental disorders	443	15181	0.0291812
Altered mental status	292.4	mental disorders	359	15181	0.023648
Transient alteration of awareness	292.5	mental disorders	68	15181	0.00447928
Hallucinations	292.6	mental disorders	42	15181	0.00276662
Symptoms involving head and neck	293	mental disorders	122	15181	0.00803636
Swelling, mass, or lump in head and neck [Space-occupying lesion, intracranial NOS]	293.1	mental disorders	482	15181	0.0317502
Schizophrenia and other psychotic disorders	295	mental disorders	3	15181	0.000197615
Schizophrenia	295.1	mental disorders	44	15181	0.00289836
Paranoid disorders	295.2	mental disorders	23	15181	0.00151505
Psychosis	295.3	mental disorders	90	15181	0.00592846
Mood disorders	296	mental disorders	487	15181	0.0320796
Bipolar	296.1	mental disorders	397	15181	0.0261511
Depression	296.2	mental disorders	2590	15181	0.170608
Major depressive disorder	296.22	mental disorders	2312	15181	0.152296
Suicidal ideation or attempt	297	mental disorders	71	15181	0.0046769
Suicidal ideation	297.1	mental disorders	119	15181	0.00783875
Suicide or self-inflicted injury	297.2	mental disorders	48	15181	0.00316185
Anxiety disorders	300	mental disorders	139	15181	0.00915618
Anxiety disorder	300.1	mental disorders	2585	15181	0.170279
Generalized anxiety disorder	300.11	mental disorders	1024	15181	0.0674527
Agorophobia, social phobia, and panic disorder	300.12	mental disorders	378	15181	0.0248995
Phobia	300.13	mental disorders	56	15181	0.00368882
Generalized anxiety & phobic disorders	300.2	mental disorders	0	15181	0
Obsessive-compulsive disorders	300.3	mental disorders	181	15181	0.0119228
Dysthymic disorder	300.4	mental disorders	536	15181	0.0353073
Acute reaction to stress	300.8	mental disorders	218	15181	0.0143601
Posttraumatic stress disorder	300.9	mental disorders	232	15181	0.0152823
Personality disorders	301	mental disorders	113	15181	0.00744351
Schizoid personality disorder	301.1	mental disorders	23	15181	0.00151505
Antisocial/borderline personality disorder	301.2	mental disorders	95	15181	0.00625782
Sexual and gender identity disorders	302	mental disorders	46	15181	0.0030301
Decreased libido	302.1	mental disorders	136	15181	0.00895857
Psychogenic and somatoform disorders	303	mental disorders	3	15181	0.000197615
Dissociative disorder	303.1	mental disorders	12	15181	0.000790462
Psychogenic disorder	303.3	mental disorders	53	15181	0.00349121
Gastrointestinal malfunction arising from mental factors	303.31	mental disorders	29	15181	0.00191028
Somatoform disorder	303.4	mental disorders	130	15181	0.00856334
Adjustment reaction	304	mental disorders	1405	15181	0.0925499
Eating disorder	305.2	mental disorders	198	15181	0.0130426
Anorexia nervosa	305.21	mental disorders	24	15181	0.00158092
Other mental disorder	306	mental disorders	1759	15181	0.115869
Mental disorders durring/after pregnancy	306.1	mental disorders	149	15181	0.0098149
Tension headache	306.9	mental disorders	140	15181	0.00922205
Conduct disorders	312	mental disorders	248	15181	0.0163362
Impulse control disorder	312.3	mental disorders	73	15181	0.00480864
Pervasive developmental disorders	313	mental disorders	74	15181	0.00487451
Attention deficit hyperactivity disorder	313.1	mental disorders	1164	15181	0.0766748
Tics and stuttering	313.2	mental disorders	115	15181	0.00757526
Autism	313.3	mental disorders	572	15181	0.0376787
Develomental delays and disorders	315	mental disorders	367	15181	0.024175
Learning disorder	315.1	mental disorders	171	15181	0.0112641
Speech and language disorder	315.2	mental disorders	278	15181	0.0183124
Mental retardation	315.3	mental disorders	123	15181	0.00810223
Substance addiction and disorders	316	mental disorders	446	15181	0.0293788
Polyneuropathy due to drugs	316.1	mental disorders	101	15181	0.00665305
Alcohol-related disorders	317	mental disorders	314	15181	0.0206837
Alcoholism	317.1	mental disorders	334	15181	0.0220012
Alcoholic liver damage	317.11	mental disorders	74	15181	0.00487451
Tobacco use disorder	318	mental disorders	2783	15181	0.183321
Meningitis	320	neurological	43	15181	0.00283249
Encephalitis	323	neurological	8	15181	0.000526975
Acute (transverse) myelitis	323.2	neurological	4	15181	0.000263487
Encephalitis, non-infectious	323.8	neurological	26	15181	0.00171267
Other CNS infection and poliomyelitis	324	neurological	93	15181	0.00612608
Jakob-Creutzfeldt disease	324.1	neurological	0	15181	0
Phlebitis and thrombophlebitis of intracranial venous sinuses	325	neurological	7	15181	0.000461103
Sleep disorders	327	neurological	1074	15181	0.0707463
Hypersomnia	327.1	neurological	351	15181	0.023121
Sleep apnea	327.3	neurological	1327	15181	0.0874119
Central/nonobstroctive sleep apnea	327.31	neurological	165	15181	0.0108688
Obstructive sleep apnea	327.32	neurological	2356	15181	0.155194
Insomnia	327.4	neurological	1437	15181	0.0946578
Organic or persistent insomnia	327.41	neurological	216	15181	0.0142283
Parasomnia	327.5	neurological	108	15181	0.00711416
Circadian rhythm sleep disorder	327.6	neurological	56	15181	0.00368882
Sleep related movement disorders	327.7	neurological	163	15181	0.0107371
Restless legs syndrome	327.71	neurological	486	15181	0.0320137
Sleep related leg cramps	327.72	neurological	36	15181	0.00237139
Other cerebral degenerations	331	neurological	7	15181	0.000461103
Hydrocephalus	331.1	neurological	52	15181	0.00342533
Cerebral degeneration, unspecified	331.9	neurological	31	15181	0.00204203
Parkinson's disease	332	neurological	115	15181	0.00757526
Extrapyramidal disease and abnormal movement disorders	333	neurological	138	15181	0.00909031
Essential tremor	333.1	neurological	232	15181	0.0152823
Myoclonus	333.2	neurological	53	15181	0.00349121
Tics and choreas	333.3	neurological	30	15181	0.00197615
Torsion dystonia	333.4	neurological	70	15181	0.00461103
Other degenerative diseases of the basal ganglia	333.8	neurological	14	15181	0.000922205
Degenerative disease of the spinal cord	334	neurological	116	15181	0.00764113
Spinocerebellar disease	334.1	neurological	23	15181	0.00151505
Anterior horn cell disease	334.2	neurological	17	15181	0.00111982
Amyotrophic Lateral Sclerosis	334.21	neurological	12	15181	0.000790462
Multiple sclerosis	335	neurological	117	15181	0.007707
Disorders of the autonomic nervous system	337	neurological	101	15181	0.00665305
Peripheral autonomic neuropathy	337.1	neurological	74	15181	0.00487451
Acute pain	338.1	neurological	1018	15181	0.0670575
Chronic pain	338.2	neurological	1069	15181	0.070417
Other headache syndromes	339	neurological	2864	15181	0.188657
Migraine	340	neurological	1730	15181	0.113958
Migrain with aura	340.1	neurological	509	15181	0.0335288
Other demyelinating diseases of central nervous system	341	neurological	54	15181	0.00355708
Hemiplegia	342	neurological	138	15181	0.00909031
Infantile cerebral palsy	343	neurological	47	15181	0.00309598
Other paralytic syndromes	344	neurological	72	15181	0.00474277
Epilepsy, recurrent seizures, convulsions	345	neurological	303	15181	0.0199592
Epilepsy	345.1	neurological	132	15181	0.00869508
Generalized convulsive epilepsy	345.11	neurological	127	15181	0.00836572
Partial epilepsy	345.12	neurological	227	15181	0.0149529
Convulsions	345.3	neurological	660	15181	0.0434754
Abnormal findings on study of brain and/or nervous system	346	neurological	9	15181	0.000592846
Nonspecific abnormal findings on radiological and other examination of skull and head	346.1	neurological	135	15181	0.00889269
Nonspecific abnormal results of function study of brain and central nervous system	346.2	neurological	37	15181	0.00243726
Nonspecific abnormal findings in cerebrospinal fluid	346.3	neurological	6	15181	0.000395231
Cataplexy and narcolepsy	347	neurological	34	15181	0.00223964
Other conditions of brain	348	neurological	13	15181	0.000856334
Cerebral edema and compression of brain	348.2	neurological	126	15181	0.00829985
Cerebral cysts	348.4	neurological	30	15181	0.00197615
Coma	348.7	neurological	17	15181	0.00111982
Encephalopathy, not elsewhere classified	348.8	neurological	239	15181	0.0157434
Other conditions of brain, NOS	348.9	neurological	190	15181	0.0125156
Other and unspecified disorders of the nervous system	349	neurological	79	15181	0.00520387
Abnormal involuntary movements	350.1	neurological	437	15181	0.028786
Abnormality of gait	350.2	neurological	969	15181	0.0638298
Lack of coordination	350.3	neurological	336	15181	0.0221329
Abnormal reflex	350.5	neurological	25	15181	0.0016468
Disturbances of sensation of smell and taste	350.6	neurological	84	15181	0.00553323
Other peripheral nerve disorders	351	neurological	1785	15181	0.117581
Disorders of other cranial nerves	352	neurological	19	15181	0.00125156
Trigeminal nerve disorders [CN5]	352.1	neurological	125	15181	0.00823398
Facial nerve disorders [CN7]	352.2	neurological	115	15181	0.00757526
Nerve root and plexus disorders	353	neurological	21	15181	0.00138331
Nerve plexus lesions	353.1	neurological	81	15181	0.00533562
Nerve root lesions	353.2	neurological	45	15181	0.00296423
Complex regional/central pain syndrome	355	neurological	85	15181	0.0055991
Chronic pain syndrome	355.1	neurological	250	15181	0.016468
Hereditary and idiopathic peripheral neuropathy	356	neurological	622	15181	0.0409723
Inflammatory and toxic neuropathy	357	neurological	462	15181	0.0304328
Myoneural disorders	358	neurological	25	15181	0.0016468
Myasthenia gravis	358.1	neurological	24	15181	0.00158092
Muscular dystrophies and other myopathies	359	neurological	0	15181	0
Muscular dystrophies	359.1	neurological	45	15181	0.00296423
Myopathy	359.2	neurological	149	15181	0.0098149
Disorders of the globe	360	sense organs	8	15181	0.000526975
Progressive myopia	360.2	sense organs	63	15181	0.00414992
Hypotony of eye	360.3	sense organs	6	15181	0.000395231
Retinal detachments and defects	361	sense organs	215	15181	0.0141624
Retinal detachment with retinal defect	361.1	sense organs	98	15181	0.00645544
Retinoschisis and retinal cysts	361.2	sense organs	20	15181	0.00131744
Other retinal disorders	362	sense organs	37	15181	0.00243726
Retinopathy of prematurity	362.1	sense organs	9	15181	0.000592846
Degeneration of macula and posterior pole of retina	362.2	sense organs	1	15181	6.58718e-05
Macular degeneration, dry	362.21	sense organs	146	15181	0.00961728
Macular degeneration, wet	362.22	sense organs	65	15181	0.00428167
Cystoid macular degeneration of retina	362.23	sense organs	117	15181	0.007707
Macular puckering of retina	362.26	sense organs	262	15181	0.0172584
Drusen (degenerative) of retina	362.27	sense organs	118	15181	0.00777287
Macular degeneration (senile) of retina NOS	362.29	sense organs	178	15181	0.0117252
Other nondiabetic retinopathy	362.3	sense organs	72	15181	0.00474277
Separation of retinal layers	362.31	sense organs	19	15181	0.00125156
Retinal vascular changes and abnomalities	362.4	sense organs	188	15181	0.0123839
Toxic maculopathy of retina	362.5	sense organs	12	15181	0.000790462
Peripheral retinal degenerations	362.6	sense organs	122	15181	0.00803636
Hereditary retinal dystrophies	362.7	sense organs	23	15181	0.00151505
Retinal hemorrhage/ischemia	362.8	sense organs	60	15181	0.00395231
Retinal edema	362.9	sense organs	89	15181	0.00586259
Chorioretinal inflammations, scars, and other disorders of choroid	363	sense organs	23	15181	0.00151505
Chorioretinal scars	363.3	sense organs	63	15181	0.00414992
Choroidal degenerations	363.4	sense organs	3	15181	0.000197615
Corneal opacity and other disorders of cornea	364	sense organs	44	15181	0.00289836
Corneal opacity	364.1	sense organs	93	15181	0.00612608
Corneal edema	364.2	sense organs	26	15181	0.00171267
Corneal degenerations	364.4	sense organs	90	15181	0.00592846
Keratoconus	364.41	sense organs	14	15181	0.000922205
Corneal dystrophy	364.5	sense organs	85	15181	0.0055991
Fuchs' dystrophy	364.51	sense organs	65	15181	0.00428167
Cornea replaced by transplant	364.9	sense organs	22	15181	0.00144918
Glaucoma	365	sense organs	824	15181	0.0542784
Open-angle glaucoma	365.1	sense organs	341	15181	0.0224623
Primary open angle glaucoma	365.11	sense organs	181	15181	0.0119228
Primary angle-closure glaucoma	365.2	sense organs	85	15181	0.0055991
Pseudoexfoliation glaucoma	365.5	sense organs	15	15181	0.000988077
Cataract	366	sense organs	1580	15181	0.104077
Nonsenile Cataract	366.1	sense organs	35	15181	0.00230551
Senile cataract	366.2	sense organs	2154	15181	0.141888
Traumatic cataract	366.3	sense organs	7	15181	0.000461103
Disorders of refraction and accommodation; blindness and low vision	367	sense organs	1267	15181	0.0834596
Myopia	367.1	sense organs	1843	15181	0.121402
Astigmatism	367.2	sense organs	1593	15181	0.104934
Presbyopia	367.4	sense organs	2569	15181	0.169225
Hypermetropia	367.8	sense organs	794	15181	0.0523022
Blindness and low vision	367.9	sense organs	172	15181	0.01133
Visual disturbances	368	sense organs	509	15181	0.0335288
Amblyopia	368.1	sense organs	119	15181	0.00783875
Diplopia and disorders of binocular vision	368.2	sense organs	183	15181	0.0120545
Anisometropia	368.3	sense organs	101	15181	0.00665305
Visual field defects	368.4	sense organs	167	15181	0.0110006
Color vision deficiencies	368.5	sense organs	9	15181	0.000592846
Disorders of accommodation	368.7	sense organs	2	15181	0.000131744
Subjective visual disturbances	368.9	sense organs	211	15181	0.013899
Psychophysical visual disturbances	368.91	sense organs	12	15181	0.000790462
Infection of the eye	369	sense organs	32	15181	0.0021079
Eye infection, viral	369.2	sense organs	82	15181	0.00540149
Conjunctivitis, infectious	369.5	sense organs	767	15181	0.0505237
Keratitis	370	sense organs	62	15181	0.00408405
Corneal ulcer	370.1	sense organs	53	15181	0.00349121
Superficial keratitis	370.2	sense organs	82	15181	0.00540149
Keratoconjunctivitis	370.3	sense organs	30	15181	0.00197615
Keratoconjunctivitis sicca	370.31	sense organs	80	15181	0.00526975
Inflammation of the eye	371	sense organs	12	15181	0.000790462
Uveitis, noninfectious or NOS	371.1	sense organs	137	15181	0.00902444
Conjunctivitis, noninfectious	371.2	sense organs	48	15181	0.00316185
Allergic conjunctivitis	371.21	sense organs	291	15181	0.0191687
Inflammation of eyelids	371.3	sense organs	789	15181	0.0519729
Noninfectious dermatoses of eyelid	371.33	sense organs	38	15181	0.00250313
Chronic inflammatory disorders of orbit	371.9	sense organs	3	15181	0.000197615
Disorders of conjunctiva	372	sense organs	172	15181	0.01133
Other disorders of eyelids	374	sense organs	124	15181	0.0081681
Ectropion or entropion	374.1	sense organs	78	15181	0.005138
Lagophthalmos	374.2	sense organs	16	15181	0.00105395
Ptosis of eyelid	374.3	sense organs	263	15181	0.0173243
Dermatochalasis	374.6	sense organs	338	15181	0.0222647
Disorders of lacrimal system	375	sense organs	64	15181	0.0042158
Dry eyes	375.1	sense organs	963	15181	0.0634346
Epiphora	375.2	sense organs	80	15181	0.00526975
Disorders of the orbit	376	sense organs	15	15181	0.000988077
Disorders of optic nerve and visual pathways	377	sense organs	91	15181	0.00599434
Optic atrophy	377.1	sense organs	127	15181	0.00836572
Optic neuritis/neuropathy	377.3	sense organs	95	15181	0.00625782
Strabismus and other disorders of binocular eye movements	378	sense organs	83	15181	0.00546736
Strabismus (not specified as paralytic)	378.1	sense organs	286	15181	0.0188393
Nystagmus and other irregular eye movements	378.2	sense organs	42	15181	0.00276662
Paralytic strabismus	378.5	sense organs	57	15181	0.00375469
Other disorders of eye	379	sense organs	99	15181	0.00652131
Scleritis and episcleritis	379.1	sense organs	45	15181	0.00296423
Disorders of vitreous body	379.2	sense organs	1206	15181	0.0794414
Aphakia and other disorders of lens	379.3	sense organs	26	15181	0.00171267
Anomalies of pupillary function	379.4	sense organs	39	15181	0.002569
Disorders of iris and ciliary body	379.5	sense organs	51	15181	0.00335946
Pigmentary iris degeneration	379.51	sense organs	37	15181	0.00243726
Pain, swelling or discharge of eye	379.9	sense organs	141	15181	0.00928793
Disorders of external ear	380	sense organs	46	15181	0.0030301
Otitis externa	380.1	sense organs	599	15181	0.0394572
Impacted cerumen	380.4	sense organs	1120	15181	0.0737764
Otitis media and Eustachian tube disorders	381	sense organs	0	15181	0
Otitis media	381.1	sense organs	575	15181	0.0378763
Suppurative and unspecified otitis media	381.11	sense organs	1027	15181	0.0676504
Eustachian tube disorders	381.2	sense organs	646	15181	0.0425532
Mastoiditis & related conditions	381.3	sense organs	23	15181	0.00151505
Otorrhea	381.9	sense organs	65	15181	0.00428167
Otalgia	382	sense organs	531	15181	0.0349779
Otosclerosis	383	sense organs	15	15181	0.000988077
Other disorders of tympanic membrane	384	sense organs	21	15181	0.00138331
Myringitis	384.1	sense organs	14	15181	0.000922205
Perforation of tympanic membrane	384.4	sense organs	104	15181	0.00685067
Other disorders of middle ear and mastoid	385	sense organs	9	15181	0.000592846
Cholesteatoma	385.3	sense organs	40	15181	0.00263487
Tympanosclerosis and middle ear disease related to otitis media	385.5	sense organs	16	15181	0.00105395
Vertiginous syndromes and other disorders of vestibular system	386	sense organs	26	15181	0.00171267
Meniere's disease	386.1	sense organs	58	15181	0.00382057
Peripheral or central vertigo	386.2	sense organs	407	15181	0.0268098
Central origin vertigo	386.21	sense organs	14	15181	0.000922205
Labyrinthitis	386.3	sense organs	59	15181	0.00388644
Dizziness and giddiness (Light-headedness and vertigo)	386.9	sense organs	2133	15181	0.140505
Other disorders of ear	388	sense organs	109	15181	0.00718003
Hearing loss	389	sense organs	1189	15181	0.0783216
Sensorineural hearing loss	389.1	sense organs	1334	15181	0.087873
Conductive hearing loss	389.2	sense organs	231	15181	0.0152164
Degenerative and vascular disorders of ear	389.3	sense organs	17	15181	0.00111982
Tinnitus	389.4	sense organs	611	15181	0.0402477
Disorders of acoustic nerve	389.5	sense organs	70	15181	0.00461103
Rheumatic disease of the heart valves	394	circulatory system	73	15181	0.00480864
Mitral valve stenosis and aortic valve stenosis	394.1	circulatory system	94	15181	0.00619195
Mitral valve disease	394.2	circulatory system	115	15181	0.00757526
Aortic valve disease	394.3	circulatory system	22	15181	0.00144918
Acute rheumatic heart disease	394.4	circulatory system	18	15181	0.00118569
Disease of tricuspid valve	394.7	circulatory system	255	15181	0.0167973
Heart valve disorders	395	circulatory system	54	15181	0.00355708
Nonrheumatic mitral valve disorders	395.1	circulatory system	956	15181	0.0629735
Nonrheumatic aortic valve disorders	395.2	circulatory system	820	15181	0.0540149
Nonrheumatic tricuspid valve disorders	395.3	circulatory system	193	15181	0.0127133
Nonrheumatic pulmonary valve disorders	395.4	circulatory system	43	15181	0.00283249
Heart valve replaced	395.6	circulatory system	274	15181	0.0180489
Abnormal heart sounds	396	circulatory system	514	15181	0.0338581
Hypertension	401	circulatory system	35	15181	0.00230551
Essential hypertension	401.1	circulatory system	6972	15181	0.459258
Hypertensive heart and/or renal disease	401.2	circulatory system	154	15181	0.0101443
Hypertensive heart disease	401.21	circulatory system	600	15181	0.0395231
Hypertensive chronic kidney disease	401.22	circulatory system	913	15181	0.060141
Other hypertensive complications	401.3	circulatory system	307	15181	0.0202226
Elevated blood pressure reading without diagnosis of hypertension	402	circulatory system	1167	15181	0.0768724
Ischemic Heart Disease	411	circulatory system	1	15181	6.58718e-05
Unstable angina (intermediate coronary syndrome)	411.1	circulatory system	565	15181	0.0372176
Myocardial infarction	411.2	circulatory system	986	15181	0.0649496
Angina pectoris	411.3	circulatory system	833	15181	0.0548712
Coronary atherosclerosis	411.4	circulatory system	2601	15181	0.171333
Aneurysm and dissection of heart	411.41	circulatory system	45	15181	0.00296423
Other chronic ischemic heart disease, unspecified	411.8	circulatory system	882	15181	0.0580989
Other acute and subacute forms of ischemic heart disease	411.9	circulatory system	53	15181	0.00349121
Other forms of chronic heart disease	414	circulatory system	606	15181	0.0399183
ASCVD	414.2	circulatory system	98	15181	0.00645544
Pulmonary heart disease	415	circulatory system	185	15181	0.0121863
Acute pulmonary heart disease	415.1	circulatory system	34	15181	0.00223964
Pulmonary embolism and infarction, acute	415.11	circulatory system	337	15181	0.0221988
Chronic pulmonary heart disease	415.2	circulatory system	436	15181	0.0287201
Primary pulmonary hypertension	415.21	circulatory system	107	15181	0.00704828
Cardiomegaly	416	circulatory system	956	15181	0.0629735
Nonspecific chest pain	418	circulatory system	4696	15181	0.309334
Precordial pain	418.1	circulatory system	282	15181	0.0185759
Myocarditis	420.1	circulatory system	30	15181	0.00197615
Pericarditis	420.2	circulatory system	197	15181	0.0129767
Acute pericarditis	420.21	circulatory system	56	15181	0.00368882
Chronic pericarditis	420.22	circulatory system	41	15181	0.00270074
Endocarditis	420.3	circulatory system	83	15181	0.00546736
Cardiomyopathy	425	circulatory system	13	15181	0.000856334
Primary/intrinsic cardiomyopathies	425.1	circulatory system	603	15181	0.0397207
Hypertrophic obstructive cardiomyopathy	425.11	circulatory system	57	15181	0.00375469
Other hypertrophic cardiomyopathy	425.12	circulatory system	54	15181	0.00355708
Secondary/extrinsic cardiomyopathies	425.2	circulatory system	223	15181	0.0146894
Other cardiomyopathy	425.8	circulatory system	35	15181	0.00230551
Cardiac conduction disorders	426	circulatory system	151	15181	0.00994664
Atrioventricular [AV] block	426.2	circulatory system	58	15181	0.00382057
First degree AV block	426.21	circulatory system	273	15181	0.017983
Mobitz II AV block	426.22	circulatory system	9	15181	0.000592846
Second degree AV block	426.23	circulatory system	48	15181	0.00316185
Atrioventricular block, complete	426.24	circulatory system	105	15181	0.00691654
Other heart block	426.25	circulatory system	23	15181	0.00151505
Bundle branch block	426.3	circulatory system	54	15181	0.00355708
Right bundle branch block	426.31	circulatory system	240	15181	0.0158092
Left bundle branch block	426.32	circulatory system	258	15181	0.0169949
Anomalous atrioventricular excitation	426.4	circulatory system	29	15181	0.00191028
Abnormal electrocardiogram [ECG] [EKG]	426.7	circulatory system	948	15181	0.0624465
Other cardiac conduction disorders	426.8	circulatory system	71	15181	0.0046769
Cardiac pacemaker/device in situ	426.9	circulatory system	105	15181	0.00691654
Cardiac pacemaker in situ	426.91	circulatory system	352	15181	0.0231869
Cardiac defibrillator in situ	426.92	circulatory system	281	15181	0.01851
Cardiac dysrhythmias	427	circulatory system	117	15181	0.007707
Paroxysmal tachycardia, unspecified	427.1	circulatory system	37	15181	0.00243726
Paroxysmal supraventricular tachycardia	427.11	circulatory system	397	15181	0.0261511
Paroxysmal ventricular tachycardia	427.12	circulatory system	399	15181	0.0262829
Atrial fibrillation and flutter	427.2	circulatory system	6	15181	0.000395231
Atrial fibrillation	427.21	circulatory system	1612	15181	0.106185
Atrial flutter	427.22	circulatory system	582	15181	0.0383374
Other specified cardiac dysrhythmias	427.3	circulatory system	1250	15181	0.0823398
Cardiac arrest and ventricular fibrillation	427.4	circulatory system	0	15181	0
Ventricular fibrillation and flutter	427.41	circulatory system	63	15181	0.00414992
Cardiac arrest	427.42	circulatory system	59	15181	0.00388644
Arrhythmia (cardiac) NOS	427.5	circulatory system	1099	15181	0.0723931
Premature beats	427.6	circulatory system	551	15181	0.0362954
Supraventricular premature beats	427.61	circulatory system	199	15181	0.0131085
Tachycardia NOS	427.7	circulatory system	768	15181	0.0505896
Sinoatrial node dysfunction (Bradycardia)	427.8	circulatory system	281	15181	0.01851
Palpitations	427.9	circulatory system	1856	15181	0.122258
Congestive heart failure; nonhypertensive	428	circulatory system	74	15181	0.00487451
Congestive heart failure (CHF) NOS	428.1	circulatory system	961	15181	0.0633028
Heart failure NOS	428.2	circulatory system	400	15181	0.0263487
Heart failure with reduced EF [Systolic or combined heart failure]	428.3	circulatory system	568	15181	0.0374152
Heart failure with preserved EF [Diastolic heart failure]	428.4	circulatory system	452	15181	0.0297741
Ill-defined descriptions and complications of heart disease	429	circulatory system	2	15181	0.000131744
Heart transplant/surgery	429.1	circulatory system	178	15181	0.0117252
Abnormal function study of cardiovascular system	429.2	circulatory system	463	15181	0.0304986
Symptoms involving cardiovascular system	429.3	circulatory system	340	15181	0.0223964
Cardiac complications, not elsewhere classified	429.9	circulatory system	76	15181	0.00500626
Intracranial hemorrhage	430	circulatory system	22	15181	0.00144918
Subarachnoid hemorrhage	430.1	circulatory system	63	15181	0.00414992
Intracerebral hemorrhage	430.2	circulatory system	108	15181	0.00711416
Subdural hemorrhage	430.3	circulatory system	64	15181	0.0042158
Cerebrovascular disease	433	circulatory system	141	15181	0.00928793
Occlusion and stenosis of precerebral arteries	433.1	circulatory system	634	15181	0.0417627
Occlusion of cerebral arteries, with cerebral infarction	433.11	circulatory system	82	15181	0.00540149
Cerebral atherosclerosis	433.12	circulatory system	87	15181	0.00573085
Occlusion of cerebral arteries	433.2	circulatory system	54	15181	0.00355708
Cerebral artery occlusion, with cerebral infarction	433.21	circulatory system	492	15181	0.0324089
Cerebral ischemia	433.3	circulatory system	58	15181	0.00382057
Transient cerebral ischemia	433.31	circulatory system	786	15181	0.0517752
Moyamoya disease	433.32	circulatory system	3	15181	0.000197615
Cerebral aneurysm	433.5	circulatory system	101	15181	0.00665305
Acute, but ill-defined cerebrovascular disease	433.6	circulatory system	153	15181	0.0100784
Late effects of cerebrovascular disease	433.8	circulatory system	253	15181	0.0166656
Atherosclerosis	440	circulatory system	116	15181	0.00764113
Atherosclerosis of renal artery	440.1	circulatory system	76	15181	0.00500626
Atherosclerosis of the extremities	440.2	circulatory system	117	15181	0.007707
Atherosclerosis of native arteries of the extremities with ulceration or gangrene	440.21	circulatory system	42	15181	0.00276662
Atherosclerosis of native arteries of the extremities with intermittent claudication	440.22	circulatory system	169	15181	0.0111323
Atherosclerosis of aorta	440.9	circulatory system	242	15181	0.015941
Vascular insufficiency of intestine	441	circulatory system	52	15181	0.00342533
Acute vascular insufficiency of intestine	441.1	circulatory system	25	15181	0.0016468
Chronic vascular insufficiency of intestine	441.2	circulatory system	21	15181	0.00138331
Other aneurysm	442	circulatory system	31	15181	0.00204203
Aortic aneurysm	442.1	circulatory system	292	15181	0.0192346
Abdominal aortic aneurysm	442.11	circulatory system	184	15181	0.0121204
Aneurysm of iliac artery	442.2	circulatory system	30	15181	0.00197615
Aneurysm of artery of lower extremity	442.3	circulatory system	29	15181	0.00191028
Arterial dissection	442.4	circulatory system	33	15181	0.00217377
Aneurysm of other specified artery	442.8	circulatory system	58	15181	0.00382057
Peripheral vascular disease	443	circulatory system	4	15181	0.000263487
Raynaud's syndrome	443.1	circulatory system	204	15181	0.0134378
Peripheral angiopathy in diseases classified elsewhere	443.7	circulatory system	12	15181	0.000790462
Other specified peripheral vascular diseases	443.8	circulatory system	32	15181	0.0021079
Peripheral vascular disease, unspecified	443.9	circulatory system	574	15181	0.0378104
Arterial embolism and thrombosis	444	circulatory system	69	15181	0.00454516
Arterial embolism and thrombosis of lower extremity artery	444.1	circulatory system	28	15181	0.00184441
Embolism and thrombosis of abdominal aorta	444.2	circulatory system	4	15181	0.000263487
Atheroembolism	444.5	circulatory system	3	15181	0.000197615
Polyarteritis nodosa and allied conditions	446	circulatory system	3	15181	0.000197615
Thromboangiitis obliterans	446.1	circulatory system	4	15181	0.000263487
Acute febrile mucocutaneous lymph node syndrome (Kawasaki disease)	446.2	circulatory system	1	15181	6.58718e-05
Hypersensitivity angiitis	446.3	circulatory system	27	15181	0.00177854
Wegener's granulomatosis	446.4	circulatory system	24	15181	0.00158092
Giant cell arteritis	446.5	circulatory system	49	15181	0.00322772
Polyarteritis nodosa	446.6	circulatory system	7	15181	0.000461103
Takayasu's disease	446.7	circulatory system	3	15181	0.000197615
Thrombotic microangiopathy	446.8	circulatory system	4	15181	0.000263487
Arteritis NOS	446.9	circulatory system	81	15181	0.00533562
Other disorders of arteries and arterioles	447	circulatory system	189	15181	0.0124498
Stricture of artery	447.1	circulatory system	78	15181	0.005138
Aortic ectasia	447.7	circulatory system	183	15181	0.0120545
Disease of capillaries	448	circulatory system	93	15181	0.00612608
Noninfectious disorders of lymphatic channels	450	circulatory system	233	15181	0.0153481
Phlebitis and thrombophlebitis	451	circulatory system	117	15181	0.007707
Phlebitis and thrombophlebitis of lower extremities	451.2	circulatory system	235	15181	0.0154799
Other venous embolism and thrombosis	452	circulatory system	611	15181	0.0402477
Iatrogenic pulmonary embolism and infarction	452.1	circulatory system	27	15181	0.00177854
Deep vein thrombosis [DVT]	452.2	circulatory system	468	15181	0.030828
Postphlebitic syndrome	452.8	circulatory system	15	15181	0.000988077
Chronic venous hypertension	453	circulatory system	24	15181	0.00158092
Varicose veins	454	circulatory system	65	15181	0.00428167
Varicose veins of lower extremity	454.1	circulatory system	303	15181	0.0199592
Varicose veins of lower extremity, symptomtic	454.11	circulatory system	348	15181	0.0229234
Hemorrhoids	455	circulatory system	1514	15181	0.0997299
Chronic venous insufficiency [CVI]	456	circulatory system	310	15181	0.0204203
Encounter for long-term (current) use of anticoagulants, antithrombotics, aspirin	457	circulatory system	5	15181	0.000329359
Encounter for long-term (current) use of antiplatelets/antithrombotics	457.2	circulatory system	122	15181	0.00803636
Encounter for long-term (current) use of aspirin	457.3	circulatory system	792	15181	0.0521705
Hypotension	458	circulatory system	22	15181	0.00144918
Orthostatic hypotension	458.1	circulatory system	260	15181	0.0171267
Iatrogenic hypotension	458.2	circulatory system	66	15181	0.00434754
Hypotension NOS	458.9	circulatory system	594	15181	0.0391279
Other disorders of circulatory system	459	circulatory system	25	15181	0.0016468
Hemorrhage NOS	459.1	circulatory system	58	15181	0.00382057
Blood vessel replaced	459.7	circulatory system	41	15181	0.00270074
Circulatory disease NEC	459.9	circulatory system	441	15181	0.0290495
Acute sinusitis	464	respiratory	2451	15181	0.161452
Acute upper respiratory infections of multiple or unspecified sites	465	respiratory	3189	15181	0.210065
Acute pharyngitis	465.2	respiratory	2355	15181	0.155128
Acute laryngitis and tracheitis	465.4	respiratory	65	15181	0.00428167
Septal Deviations/Turbinate Hypertrophy	470	respiratory	544	15181	0.0358343
Nasal polyps	471	respiratory	132	15181	0.00869508
Chronic pharyngitis and nasopharyngitis	472	respiratory	855	15181	0.0563204
Diseases of the larynx and vocal cords	473	respiratory	213	15181	0.0140307
Chronic laryngitis	473.1	respiratory	57	15181	0.00375469
Paralysis/spasm of vocal cords or larynx	473.3	respiratory	63	15181	0.00414992
Voice disturbance	473.4	respiratory	493	15181	0.0324748
Acute and chronic tonsillitis	474	respiratory	21	15181	0.00138331
Acute tonsillitis	474.1	respiratory	114	15181	0.00750939
Chronic tonsillitis and adenoiditis	474.2	respiratory	411	15181	0.0270733
Chronic sinusitis	475	respiratory	1538	15181	0.101311
Postnasal drip	475.9	respiratory	188	15181	0.0123839
Allergic rhinitis	476	respiratory	2700	15181	0.177854
Epistaxis or throat hemorrhage	477	respiratory	346	15181	0.0227916
Throat pain	478	respiratory	94	15181	0.00619195
Other upper respiratory disease	479	respiratory	1028	15181	0.0677162
Pneumonia	480	respiratory	1321	15181	0.0870167
Bacterial pneumonia	480.1	respiratory	204	15181	0.0134378
Pneumococcal pneumonia	480.11	respiratory	65	15181	0.00428167
Pseudomonal pneumonia	480.12	respiratory	16	15181	0.00105395
MRSA pneumonia	480.13	respiratory	11	15181	0.00072459
Viral pneumonia	480.2	respiratory	28	15181	0.00184441
Pneumonia due to fungus (mycoses)	480.3	respiratory	36	15181	0.00237139
Bronchopneumonia and lung abscess	480.5	respiratory	28	15181	0.00184441
Influenza	481	respiratory	241	15181	0.0158751
Acute bronchitis and bronchiolitis	483	respiratory	1465	15181	0.0965022
Asthma	495	respiratory	2104	15181	0.138594
Chronic obstructive asthma	495.1	respiratory	113	15181	0.00744351
Chronic obstructive asthma with exacerbation	495.11	respiratory	36	15181	0.00237139
Asthma with exacerbation	495.2	respiratory	609	15181	0.0401159
Chronic airway obstruction	496	respiratory	813	15181	0.0535538
Emphysema	496.1	respiratory	323	15181	0.0212766
Chronic bronchitis	496.2	respiratory	93	15181	0.00612608
Obstructive chronic bronchitis	496.21	respiratory	281	15181	0.01851
Bronchiectasis	496.3	respiratory	171	15181	0.0112641
Bronchitis	497	respiratory	806	15181	0.0530927
Acute bronchospasm	498	respiratory	112	15181	0.00737764
Cystic fibrosis	499	respiratory	43	15181	0.00283249
Lung disease due to external agents	500	respiratory	18	15181	0.00118569
Extrinsic allergic alveolitis	500.1	respiratory	17	15181	0.00111982
Pneumoconiosis	500.2	respiratory	29	15181	0.00191028
Pneumonitis due to inhalation of food or vomitus	501	respiratory	94	15181	0.00619195
Postinflammatory pulmonary fibrosis	502	respiratory	287	15181	0.0189052
Pulmonary congestion and hypostasis	503	respiratory	263	15181	0.0173243
Other alveolar and parietoalveolar pneumonopathy	504	respiratory	103	15181	0.0067848
Idiopathic fibrosing alveolitis	504.1	respiratory	49	15181	0.00322772
Other pulmonary inflamation or edema	505	respiratory	116	15181	0.00764113
Empyema and pneumothorax	506	respiratory	294	15181	0.0193663
Pleurisy; pleural effusion	507	respiratory	956	15181	0.0629735
Pulmonary collapse; interstitial and compensatory emphysema	508	respiratory	1064	15181	0.0700876
Respiratory failure, insufficiency, arrest	509	respiratory	1	15181	6.58718e-05
Respiratory failure	509.1	respiratory	440	15181	0.0289836
Respiratory insufficiency	509.2	respiratory	176	15181	0.0115934
Pulmonary insufficiency or respiratory failure following trauma and surgery	509.3	respiratory	112	15181	0.00737764
Respiratory arrest	509.5	respiratory	4	15181	0.000263487
Dependence on respirator [Ventilator] or supplemental oxygen	509.8	respiratory	153	15181	0.0100784
Other diseases of lung	510	respiratory	1008	15181	0.0663988
Lung transplant	510.2	respiratory	51	15181	0.00335946
Other symptoms of respiratory system	512	respiratory	13	15181	0.000856334
Wheezing	512.1	respiratory	388	15181	0.0255583
Painful respiration	512.2	respiratory	516	15181	0.0339899
Abnormal chest sounds	512.3	respiratory	31	15181	0.00204203
Shortness of breath	512.7	respiratory	2456	15181	0.161781
Cough	512.8	respiratory	3947	15181	0.259996
Other dyspnea	512.9	respiratory	2820	15181	0.185759
Respiratory abnormalities	513	respiratory	56	15181	0.00368882
Hypoventilation	513.3	respiratory	52	15181	0.00342533
Apnea	513.31	respiratory	60	15181	0.00395231
Orthopnea	513.32	respiratory	21	15181	0.00138331
Hyperventilation	513.4	respiratory	34	15181	0.00223964
Disorders of diaphragm	513.8	respiratory	66	15181	0.00434754
Abnormal findings examination of lungs	514	respiratory	1286	15181	0.0847112
Abnormal results of function study of pulmonary system	514.1	respiratory	129	15181	0.00849746
Solitary pulmonary nodule	514.2	respiratory	506	15181	0.0333311
Abnormal sputum	516	respiratory	16	15181	0.00105395
Hemoptysis	516.1	respiratory	143	15181	0.00941967
Other diseases of respiratory system, not elsewhere classified	519	respiratory	11	15181	0.00072459
Tracheostomy complications	519.1	respiratory	5	15181	0.000329359
Respiratory complications	519.2	respiratory	35	15181	0.00230551
Other diseases of respiratory system, NEC	519.8	respiratory	139	15181	0.00915618
Symptoms involving respiratory system and other chest symptoms	519.9	respiratory	459	15181	0.0302352
Disorders of tooth development	520	digestive	77	15181	0.00507213
Hereditary disturbances in tooth structure	520.1	digestive	21	15181	0.00138331
Disturbances in tooth eruption	520.2	digestive	170	15181	0.0111982
Diseases of hard tissues of teeth	521	digestive	29	15181	0.00191028
Dental caries	521.1	digestive	473	15181	0.0311574
Dental abrasion, erosion and attrition	521.2	digestive	7	15181	0.000461103
Tooth complications likely association with other diseases	521.4	digestive	12	15181	0.000790462
Diseases of pulp and periapical tissues	522	digestive	15	15181	0.000988077
Pulpitis and necrosis of tooth pulp	522.1	digestive	32	15181	0.0021079
Periapical abscess	522.5	digestive	193	15181	0.0127133
Gingival and periodontal diseases	523	digestive	79	15181	0.00520387
Gingivitis	523.1	digestive	78	15181	0.005138
Periodontitis (acute or chronic)	523.3	digestive	6	15181	0.000395231
Acute periodontitis	523.31	digestive	186	15181	0.0122522
Chronic periodontitis	523.32	digestive	216	15181	0.0142283
Dentofacial anomalies, including malocclusion	524	digestive	22	15181	0.00144918
Anomalies of tooth position/malocclusion	524.3	digestive	171	15181	0.0112641
Other diseases of the teeth and supporting structures	525	digestive	210	15181	0.0138331
Loss of teeth or edentulism	525.1	digestive	234	15181	0.015414
Atrophy of edentulous alveolar ridge	525.2	digestive	24	15181	0.00158092
Diseases of the jaws	526	digestive	54	15181	0.00355708
Cysts of the jaws	526.1	digestive	10	15181	0.000658718
Anomalies of jaw size/symmetry	526.3	digestive	38	15181	0.00250313
Temporomandibular joint disorders	526.4	digestive	78	15181	0.005138
Temporomandibular joint disorder, unspecified	526.41	digestive	111	15181	0.00731177
Arthralgia/ankylosis of temporomandibular joint	526.42	digestive	82	15181	0.00540149
Inflammatory conditions of jaw	526.5	digestive	20	15181	0.00131744
Exostosis of jaw	526.8	digestive	10	15181	0.000658718
Jaw disease NOS	526.9	digestive	40	15181	0.00263487
Diseases of the salivary glands	527	digestive	16	15181	0.00105395
Hypertrophy of salivary gland	527.1	digestive	10	15181	0.000658718
Sialoadenitis	527.2	digestive	83	15181	0.00546736
Disturbance of salivary secretion	527.7	digestive	87	15181	0.00573085
Other specified diseases of the salivary glands	527.8	digestive	24	15181	0.00158092
Diseases of the oral soft tissues, excluding lesions specific for gingiva and tongue	528	digestive	236	15181	0.0155457
Stomatitis and mucositis	528.1	digestive	49	15181	0.00322772
Stomatitis and mucositis (ulcerative)	528.11	digestive	31	15181	0.00204203
Oral aphthae	528.12	digestive	72	15181	0.00474277
Cellulitis and abscess of oral soft tissues	528.3	digestive	14	15181	0.000922205
Cysts of oral soft tissues	528.4	digestive	4	15181	0.000263487
Cyst of the salivary gland	528.41	digestive	11	15181	0.00072459
Diseases of lips	528.5	digestive	90	15181	0.00592846
Leukoplakia of oral mucosa	528.6	digestive	33	15181	0.00217377
Sialolithiasis	528.7	digestive	18	15181	0.00118569
Diseases and other conditions of the tongue	529	digestive	76	15181	0.00500626
Glossitis	529.1	digestive	29	15181	0.00191028
Glossodynia	529.6	digestive	31	15181	0.00204203
Diseases of esophagus	530	digestive	127	15181	0.00836572
Esophagitis, GERD and related diseases	530.1	digestive	288	15181	0.0189711
GERD	530.11	digestive	4050	15181	0.266781
Ulcer of esophagus	530.12	digestive	58	15181	0.00382057
Barrett's esophagus	530.13	digestive	195	15181	0.012845
Reflux esophagitis	530.14	digestive	525	15181	0.0345827
Eosinophilic esophagitis	530.15	digestive	86	15181	0.00566498
Esophageal bleeding (varices/hemorrhage)	530.2	digestive	87	15181	0.00573085
Stricture and stenosis of esophagus	530.3	digestive	150	15181	0.00988077
Disorders of esophageal motility	530.5	digestive	93	15181	0.00612608
Diverticulum of esophagus, acquired	530.6	digestive	12	15181	0.000790462
Gastroesophageal laceration-hemorrhage syndrome	530.7	digestive	12	15181	0.000790462
Heartburn	530.9	digestive	214	15181	0.0140966
Peptic ulcer (excl. esophageal)	531	digestive	6	15181	0.000395231
Hemorrhage from gastrointestinal ulcer	531.1	digestive	69	15181	0.00454516
Gastric ulcer	531.2	digestive	152	15181	0.0100125
Duodenal ulcer	531.3	digestive	66	15181	0.00434754
Peptic ulcer, site unspecified	531.4	digestive	143	15181	0.00941967
Gastrojejunal ulcer	531.5	digestive	25	15181	0.0016468
Dysphagia	532	digestive	1220	15181	0.0803636
Gastritis and duodenitis	535	digestive	1	15181	6.58718e-05
Acute gastritis	535.1	digestive	37	15181	0.00243726
Atrophic gastritis	535.2	digestive	106	15181	0.00698241
Duodenitis	535.6	digestive	71	15181	0.0046769
Other specified gastritis	535.8	digestive	126	15181	0.00829985
Gastritis and duodenitis, NOS	535.9	digestive	315	15181	0.0207496
Disorders of function of stomach	536	digestive	1	15181	6.58718e-05
Gastroparesis	536.3	digestive	128	15181	0.00843159
Complications of gastrostomy, colostomy and enterostomy	536.7	digestive	67	15181	0.00441341
Dyspepsia and other specified disorders of function of stomach	536.8	digestive	472	15181	0.0310915
Other disorders of stomach and duodenum	537	digestive	353	15181	0.0232528
Lesions of stomach and duodenum	537.1	digestive	23	15181	0.00151505
Bariatric surgery	539	digestive	1027	15181	0.0676504
Appendiceal conditions	540	digestive	10	15181	0.000658718
Appendicitis	540.1	digestive	46	15181	0.0030301
Acute appendicitis	540.11	digestive	147	15181	0.00968316
Abdominal hernia	550	digestive	107	15181	0.00704828
Inguinal hernia	550.1	digestive	571	15181	0.0376128
Diaphragmatic hernia	550.2	digestive	664	15181	0.0437389
Femoral hernia	550.3	digestive	9	15181	0.000592846
Umbilical hernia	550.4	digestive	255	15181	0.0167973
Ventral hernia	550.5	digestive	254	15181	0.0167314
Incisional hernia	550.6	digestive	222	15181	0.0146235
Inflammatory bowel disease and other gastroenteritis and colitis	555	digestive	5	15181	0.000329359
Regional enteritis	555.1	digestive	187	15181	0.012318
Ulcerative colitis	555.2	digestive	162	15181	0.0106712
Ulcerative colitis (chronic)	555.21	digestive	98	15181	0.00645544
Ulceration of the lower GI tract	556	digestive	16	15181	0.00105395
Ulceration of intestine	556.1	digestive	50	15181	0.00329359
Angiodysplasia of intestine (without mention of hemorrhage)	556.11	digestive	22	15181	0.00144918
Intestinal malabsorption (non-celiac)	557	digestive	150	15181	0.00988077
Celiac disease	557.1	digestive	122	15181	0.00803636
Noninfectious gastroenteritis	558	digestive	806	15181	0.0530927
Ileostomy status	559	digestive	104	15181	0.00685067
Intestinal obstruction without mention of hernia	560	digestive	0	15181	0
Paralytic ileus	560.1	digestive	131	15181	0.00862921
Impaction of intestine	560.2	digestive	18	15181	0.00118569
Peritoneal or intestinal adhesions	560.3	digestive	60	15181	0.00395231
Other intestinal obstruction	560.4	digestive	328	15181	0.021606
Symptoms involving digestive system	561	digestive	522	15181	0.0343851
Diarrhea	561.1	digestive	2127	15181	0.140109
Flatulence	561.2	digestive	505	15181	0.0332653
Diverticulosis and diverticulitis	562	digestive	27	15181	0.00177854
Diverticulosis	562.1	digestive	1671	15181	0.110072
Diverticulitis	562.2	digestive	387	15181	0.0254924
Constipation	563	digestive	1685	15181	0.110994
Functional digestive disorders	564	digestive	149	15181	0.0098149
Irritable Bowel Syndrome	564.1	digestive	659	15181	0.0434095
Abnormal findings on exam of gastrointestinal tract/ abdominal area	564.8	digestive	288	15181	0.0189711
Personal history of diseases of digestive system	564.9	digestive	229	15181	0.0150846
Anal and rectal conditions	565	digestive	537	15181	0.0353732
Anal and rectal polyp	565.1	digestive	222	15181	0.0146235
Peritonitis and retroperitoneal infections	567	digestive	153	15181	0.0100784
Other disorders of peritoneum	568	digestive	38	15181	0.00250313
Peritoneal adhesions (postoperative) (postinfection)	568.1	digestive	76	15181	0.00500626
Other disorders of intestine	569	digestive	434	15181	0.0285884
Toxic gastroenteritis and colitis	569.1	digestive	22	15181	0.00144918
Gastrointestinal complications	569.2	digestive	252	15181	0.0165997
Chronic liver disease and cirrhosis	571	digestive	1	15181	6.58718e-05
Other chronic nonalcoholic liver disease	571.5	digestive	753	15181	0.0496015
Cirrhosis of liver without mention of alcohol	571.51	digestive	213	15181	0.0140307
Primary biliary cirrhosis	571.6	digestive	35	15181	0.00230551
Liver abscess and sequelae of chronic liver disease	571.8	digestive	88	15181	0.00579672
Portal hypertension	571.81	digestive	84	15181	0.00553323
Ascites (non malignant)	572	digestive	208	15181	0.0137013
Other disorders of liver	573	digestive	523	15181	0.034451
Chronic passive congestion of liver	573.1	digestive	8	15181	0.000526975
Liver replaced by transplant	573.2	digestive	55	15181	0.00362295
Hepatomegaly	573.3	digestive	66	15181	0.00434754
Acute and subacute necrosis of liver	573.4	digestive	33	15181	0.00217377
Jaundice (not of newborn)	573.5	digestive	79	15181	0.00520387
Nonspecific elevation of levels of transaminase or lactic acid dehydrogenase [LDH]	573.6	digestive	389	15181	0.0256241
Abnormal results of function study of liver	573.7	digestive	532	15181	0.0350438
Abnormal serum enzyme levels	573.9	digestive	455	15181	0.0299717
Cholelithiasis and cholecystitis	574	digestive	5	15181	0.000329359
Cholelithiasis	574.1	digestive	632	15181	0.041631
Cholelithiasis with acute cholecystitis	574.11	digestive	63	15181	0.00414992
Cholelithiasis with other cholecystitis	574.12	digestive	142	15181	0.0093538
Calculus of bile duct	574.2	digestive	121	15181	0.00797049
Cholecystitis without cholelithiasis	574.3	digestive	192	15181	0.0126474
Other biliary tract disease	575	digestive	2	15181	0.000131744
Cholangitis	575.1	digestive	63	15181	0.00414992
Obstruction of bile duct	575.2	digestive	76	15181	0.00500626
Cholesterolosis of gallbladder	575.6	digestive	37	15181	0.00243726
Other disorders of gallbladder	575.7	digestive	120	15181	0.00790462
Other disorders of biliary tract	575.8	digestive	143	15181	0.00941967
Nonspecific abnormal findings on radiological and other examination of biliary tract	575.9	digestive	35	15181	0.00230551
Diseases of pancreas	577	digestive	197	15181	0.0129767
Acute pancreatitis	577.1	digestive	190	15181	0.0125156
Chronic pancreatitis	577.2	digestive	59	15181	0.00388644
Cyst and pseudocyst of pancreas	577.3	digestive	137	15181	0.00902444
Gastrointestinal hemorrhage	578	digestive	0	15181	0
Hematemesis	578.1	digestive	69	15181	0.00454516
Blood in stool	578.2	digestive	620	15181	0.0408405
Hemorrhage of rectum and anus	578.8	digestive	660	15181	0.0434754
Hemorrhage of gastrointestinal tract	578.9	digestive	414	15181	0.0272709
Other symptoms involving abdomen and pelvis	579	digestive	511	15181	0.0336605
Splenomegaly	579.2	digestive	135	15181	0.00889269
Nonspecific abnormal findings in stool contents	579.8	digestive	394	15181	0.0259535
Nephritis; nephrosis; renal sclerosis	580	genitourinary	9	15181	0.000592846
Glomerulonephritis	580.1	genitourinary	2	15181	0.000131744
Proliferative glomerulonephritis	580.11	genitourinary	32	15181	0.0021079
Non-proliferative glomerulonephritis	580.12	genitourinary	68	15181	0.00447928
Acute glomerulonephritis, NOS	580.13	genitourinary	21	15181	0.00138331
Chronic glomerulonephritis, NOS	580.14	genitourinary	30	15181	0.00197615
Nephrotic syndrome without mention of glomerulonephritis	580.2	genitourinary	65	15181	0.00428167
Nephritis and nephropathy without mention of glomerulonephritis	580.3	genitourinary	2	15181	0.000131744
Nephritis and nephropathy in diseases classified elsewhere	580.31	genitourinary	117	15181	0.007707
Nephritis and nephropathy with pathological lesion	580.32	genitourinary	104	15181	0.00685067
Renal sclerosis, NOS	580.4	genitourinary	37	15181	0.00243726
Renal failure	585	genitourinary	0	15181	0
Acute renal failure	585.1	genitourinary	981	15181	0.0646202
Renal failure NOS	585.2	genitourinary	168	15181	0.0110665
Chronic renal failure [CKD]	585.3	genitourinary	741	15181	0.048811
Renal dialysis	585.31	genitourinary	134	15181	0.00882682
End stage renal disease	585.32	genitourinary	297	15181	0.0195639
Chronic Kidney Disease, Stage III	585.33	genitourinary	1121	15181	0.0738423
Chronic Kidney Disease, Stage IV	585.34	genitourinary	300	15181	0.0197615
Chronic kidney disease, Stage I or II	585.4	genitourinary	274	15181	0.0180489
Other disorders of the kidney and ureters	586	genitourinary	756	15181	0.0497991
Anatomical abnormatilies of kidney and ureters	586.1	genitourinary	1	15181	6.58718e-05
Small kidney	586.11	genitourinary	7	15181	0.000461103
Vesicoureteral reflux	586.12	genitourinary	35	15181	0.00230551
Cyst of kidney, acquired	586.2	genitourinary	391	15181	0.0257559
Vascular disorders of kidney/hypertrophy	586.3	genitourinary	25	15181	0.0016468
Stricture/obstruction of ureter	586.4	genitourinary	189	15181	0.0124498
Kidney replaced by transpant	587	genitourinary	223	15181	0.0146894
Disorders resulting from impaired renal function	588	genitourinary	47	15181	0.00309598
Renal osteodystrophy	588.1	genitourinary	79	15181	0.00520387
Secondary hyperparathyroidism (of renal origin)	588.2	genitourinary	105	15181	0.00691654
Abnormal results of function study of kidney	589	genitourinary	60	15181	0.00395231
Pyelonephritis	590	genitourinary	236	15181	0.0155457
Urinary tract infection	591	genitourinary	2293	15181	0.151044
Cystitis and urethritis	592	genitourinary	3	15181	0.000197615
Cystitis	592.1	genitourinary	84	15181	0.00553323
Acute cystitis	592.11	genitourinary	311	15181	0.0204861
Chronic cystitis	592.12	genitourinary	32	15181	0.0021079
Chronic interstitial cystitis	592.13	genitourinary	44	15181	0.00289836
Urethritis and urethral syndrome	592.2	genitourinary	29	15181	0.00191028
Urethral syndrome	592.21	genitourinary	2	15181	0.000131744
Urethral stricture due to infecton	592.3	genitourinary	0	15181	0
Hematuria	593	genitourinary	1143	15181	0.0752915
Gross hematuria	593.1	genitourinary	288	15181	0.0189711
Microscopic hematuria	593.2	genitourinary	282	15181	0.0185759
Urinary calculus	594	genitourinary	233	15181	0.0153481
Calculus of kidney	594.1	genitourinary	849	15181	0.0559252
Calculus of lower urinary tract	594.2	genitourinary	47	15181	0.00309598
Calculus of ureter	594.3	genitourinary	360	15181	0.0237139
Renal colic	594.8	genitourinary	77	15181	0.00507213
Hydronephrosis	595	genitourinary	271	15181	0.0178513
Other disorders of bladder	596	genitourinary	194	15181	0.0127791
Bladder neck obstruction	596.1	genitourinary	127	15181	0.00836572
Functional disorders of bladder	596.5	genitourinary	276	15181	0.0181806
Other disorders of urethra and urinary tract	597	genitourinary	123	15181	0.00810223
Urethral stricture (not specified as infectious)	597.1	genitourinary	87	15181	0.00573085
Urinary complications NEC	597.2	genitourinary	44	15181	0.00289836
Urethral hypermobility/ISD	597.8	genitourinary	41	15181	0.00270074
Abnormal findings on examination of urine	598	genitourinary	28	15181	0.00184441
Other cells and casts in urine	598.4	genitourinary	253	15181	0.0166656
Other nonspecific findings on examination of urine	598.9	genitourinary	289	15181	0.019037
Other symptoms/disorders or the urinary system	599	genitourinary	316	15181	0.0208155
Urinary obstruction	599.1	genitourinary	53	15181	0.00349121
Retention of urine	599.2	genitourinary	761	15181	0.0501285
Dysuria	599.3	genitourinary	1267	15181	0.0834596
Urinary incontinence	599.4	genitourinary	1110	15181	0.0731177
Frequency of urination and polyuria	599.5	genitourinary	1381	15181	0.090969
Oliguria and anuria	599.6	genitourinary	19	15181	0.00125156
Urethral discharge	599.7	genitourinary	8	15181	0.000526975
Other symptoms involving urinary system	599.8	genitourinary	284	15181	0.0187076
Other abnormality of urination	599.9	genitourinary	609	15181	0.0401159
Hyperplasia of prostate	600	genitourinary	1363	15181	0.0897833
Inflammatory diseases of prostate	601	genitourinary	0	15181	0
Prostatitis	601.1	genitourinary	102	15181	0.00671892
Acute prostatitis	601.11	genitourinary	56	15181	0.00368882
Chronic prostatitis	601.12	genitourinary	73	15181	0.00480864
Orchitis and epididymitis	601.3	genitourinary	106	15181	0.00698241
Balanoposthitis	601.4	genitourinary	15	15181	0.000988077
Other inflammatory disorders of male genital organs	601.8	genitourinary	13	15181	0.000856334
Other disorders of prostate	602	genitourinary	57	15181	0.00375469
Dysplasia of prostate	602.3	genitourinary	8	15181	0.000526975
Other disorders of testis	603	genitourinary	17	15181	0.00111982
Hydrocele	603.1	genitourinary	81	15181	0.00533562
Spermatocele	603.2	genitourinary	30	15181	0.00197615
Disorders of penis	604	genitourinary	82	15181	0.00540149
Redundant prepuce and phimosis/BXO	604.1	genitourinary	45	15181	0.00296423
Vascular disorders of penis	604.2	genitourinary	16	15181	0.00105395
Peyronie's disease	604.3	genitourinary	29	15181	0.00191028
Erectile dysfunction [ED]	605	genitourinary	916	15181	0.0603386
Other disorders of male genital organs	608	genitourinary	353	15181	0.0232528
Male infertility and abnormal spermatozoa	609	genitourinary	0	15181	0
Infertility, male	609.1	genitourinary	34	15181	0.00223964
Azoospermia and oligospermia	609.11	genitourinary	12	15181	0.000790462
Abnormal spermatozoa	609.2	genitourinary	22	15181	0.00144918
Benign mammary dysplasias	610	genitourinary	1	15181	6.58718e-05
Cystic mastopathy	610.1	genitourinary	818	15181	0.0538831
Fibroadenosis of breast	610.2	genitourinary	48	15181	0.00316185
Fibrosclerosis of breast	610.3	genitourinary	191	15181	0.0125815
Benign neoplasm of breast	610.4	genitourinary	139	15181	0.00915618
Other specified benign mammary dysplasias	610.8	genitourinary	90	15181	0.00592846
Abnormal findings on mammogram or breast exam	611	genitourinary	137	15181	0.00902444
Abnormal mammogram	611.1	genitourinary	2100	15181	0.138331
Mammographic microcalcification	611.11	genitourinary	216	15181	0.0142283
Lump or mass in breast	611.3	genitourinary	1256	15181	0.082735
Breast conditions, congenital or relating to hormones	612	genitourinary	1	15181	6.58718e-05
Galactorrhea	612.1	genitourinary	24	15181	0.00158092
Hypertrophy of breast (Gynecomastia)	612.2	genitourinary	225	15181	0.0148212
Congenital anomalies of breast	612.3	genitourinary	13	15181	0.000856334
Other nonmalignant breast conditions	613	genitourinary	4	15181	0.000263487
Inflammatory disease of breast	613.1	genitourinary	104	15181	0.00685067
Mastodynia	613.5	genitourinary	329	15181	0.0216718
Other signs and symptoms in breast	613.7	genitourinary	418	15181	0.0275344
Other specified disorders of breast	613.8	genitourinary	410	15181	0.0270074
Breast disorder NOS	613.9	genitourinary	35	15181	0.00230551
Inflammatory diseases of female pelvic organs	614	genitourinary	1	15181	6.58718e-05
Pelvic peritoneal adhesions, female (postoperative) (postinfection)	614.1	genitourinary	36	15181	0.00237139
Pelvic inflammatory disease (PID)	614.3	genitourinary	3	15181	0.000197615
Acute inflammatory pelvic disease	614.31	genitourinary	6	15181	0.000395231
Chronic inflammatory pelvic disease	614.32	genitourinary	24	15181	0.00158092
Pelvic inflammatory disease, NOS	614.33	genitourinary	19	15181	0.00125156
Inflammatory diseases of uterus, except cervix	614.4	genitourinary	8	15181	0.000526975
Inflammatory disease of cervix, vagina, and vulva	614.5	genitourinary	15	15181	0.000988077
Cervicitis and endocervicitis	614.51	genitourinary	76	15181	0.00500626
Vaginitis and vulvovaginitis	614.52	genitourinary	604	15181	0.0397866
Cyst or abscess of Bartholin's gland	614.53	genitourinary	26	15181	0.00171267
Abscess or ulceration of vulva	614.54	genitourinary	19	15181	0.00125156
Endometriosis	615	genitourinary	207	15181	0.0136355
Disorders secondary to childbirth, surgery, trauma	617	genitourinary	66	15181	0.00434754
Genital prolapse	618	genitourinary	71	15181	0.0046769
Prolapse of vaginal walls	618.1	genitourinary	304	15181	0.020025
Uterine/Uterovaginal prolapse	618.2	genitourinary	182	15181	0.0119887
Prolapse of vaginal vault after hysterectomy	618.5	genitourinary	42	15181	0.00276662
Vaginal enterocele, congenital or acquired	618.6	genitourinary	33	15181	0.00217377
Noninflammatory female genital disorders	619	genitourinary	167	15181	0.0110006
Noninflammatory disorders of ovary, fallopian tube, and broad ligament	619.1	genitourinary	97	15181	0.00638957
Disorders of uterus, NEC	619.2	genitourinary	135	15181	0.00889269
Noninflammatory disorders of cervix	619.3	genitourinary	84	15181	0.00553323
Noninflammatory disorders of vagina	619.4	genitourinary	211	15181	0.013899
Noninflammatory disorders of vulva and perineum	619.5	genitourinary	73	15181	0.00480864
Dysplasia of female genital organs	620	genitourinary	28	15181	0.00184441
Dysplasia of cervix	620.1	genitourinary	8	15181	0.000526975
Endometrial hyperplasia	621	genitourinary	90	15181	0.00592846
Polyp of female genital organs	622	genitourinary	10	15181	0.000658718
Polyp of corpus uteri	622.1	genitourinary	181	15181	0.0119228
Mucous polyp of cervix	622.2	genitourinary	126	15181	0.00829985
Hypertrophy of female genital organs	623	genitourinary	38	15181	0.00250313
Symptoms involving female genital tract	624	genitourinary	115	15181	0.00757526
Dystrophy of female genital tract	624.1	genitourinary	21	15181	0.00138331
Atrophy of female genital tract	624.2	genitourinary	7	15181	0.000461103
stress incontinence, female	624.9	genitourinary	469	15181	0.0308939
Pain and other symptoms associated with female genital organs	625	genitourinary	764	15181	0.0503261
Dyspareunia	625.1	genitourinary	138	15181	0.00909031
Disorders of menstruation and other abnormal bleeding from female genital tract	626	genitourinary	190	15181	0.0125156
Irregular menstrual cycle/bleeding	626.1	genitourinary	412	15181	0.0271392
Absent or infrequent menstruation	626.11	genitourinary	446	15181	0.0293788
Excessive or frequent menstruation	626.12	genitourinary	713	15181	0.0469666
Irregular menstrual cycle	626.13	genitourinary	524	15181	0.0345168
Irregular menstrual bleeding	626.14	genitourinary	153	15181	0.0100784
Infertility, female, associated with anovulation	626.15	genitourinary	39	15181	0.002569
Dysmenorrhea	626.2	genitourinary	345	15181	0.0227258
Mittelschmerz	626.21	genitourinary	3	15181	0.000197615
Premenstrual tension syndromes	626.4	genitourinary	118	15181	0.00777287
Infertility, female	626.8	genitourinary	228	15181	0.0150188
Menopausal and postmenopausal disorders	627	genitourinary	184	15181	0.0121204
Postmenopausal bleeding	627.1	genitourinary	517	15181	0.0340557
Symptomatic menopause	627.2	genitourinary	1496	15181	0.0985442
Symptomatic artificial menopause	627.21	genitourinary	52	15181	0.00342533
Need for Hormone replacement therapy (postmenopausal)	627.22	genitourinary	234	15181	0.015414
Postmenopausal atrophic vaginitis	627.3	genitourinary	489	15181	0.0322113
Premenopausal menorrhagia	627.4	genitourinary	99	15181	0.00652131
Premature menopause and other ovarian failure	627.5	genitourinary	51	15181	0.00335946
Ovarian cyst	628	genitourinary	635	15181	0.0418286
Miscarriage; stillbirth	634	pregnancy complications	111	15181	0.00731177
Missed abortion/Hydatidiform mole	634.1	pregnancy complications	88	15181	0.00579672
Ectopic pregnancy	634.3	pregnancy complications	20	15181	0.00131744
Hemorrhage during pregnancy; childbirth and postpartum	635	pregnancy complications	3	15181	0.000197615
Antepartum hemorrhage, abruptio placentae, and placenta previa	635.2	pregnancy complications	82	15181	0.00540149
Placenta previa and abruptio placenta	635.3	pregnancy complications	25	15181	0.0016468
Early or threatened labor; hemorrhage in early pregnancy	636	pregnancy complications	105	15181	0.00691654
Threatened premature labor	636.1	pregnancy complications	86	15181	0.00566498
Early onset of delivery	636.2	pregnancy complications	34	15181	0.00223964
Hemorrhage in early pregnancy	636.3	pregnancy complications	105	15181	0.00691654
Cervical incompetence	636.8	pregnancy complications	14	15181	0.000922205
Short gestation; low birth weight; and fetal growth retardation	637	pregnancy complications	77	15181	0.00507213
Other high-risk pregnancy	638	pregnancy complications	444	15181	0.0292471
Complications following abortion or ectopic and molar pregnancies	639	pregnancy complications	2	15181	0.000131744
Hypertension complicating pregnancy, childbirth, and the puerperium	642	pregnancy complications	93	15181	0.00612608
Preeclampsia and eclampsia	642.1	pregnancy complications	55	15181	0.00362295
Excessive vomiting in pregnancy	643	pregnancy complications	23	15181	0.00151505
Hyperemesis gravidarum	643.1	pregnancy complications	28	15181	0.00184441
Anemia during pregnancy	644	pregnancy complications	100	15181	0.00658718
Late pregnancy and failed induction	645	pregnancy complications	107	15181	0.00704828
Other complications of pregnancy NEC	646	pregnancy complications	252	15181	0.0165997
Infectious and parasitic complications affecting pregnancy	647	pregnancy complications	50	15181	0.00329359
Infections of genitourinary tract during pregnancy	647.1	pregnancy complications	68	15181	0.00447928
Major puerperal infection	647.3	pregnancy complications	7	15181	0.000461103
Other conditions or status of the mother complicating pregnancy, childbirth, or the puerperium	649	pregnancy complications	430	15181	0.0283249
Diabetes or abnormal glucose tolerance complicating pregnancy	649.1	pregnancy complications	178	15181	0.0117252
Normal delivery	650	pregnancy complications	131	15181	0.00862921
Multiple gestation	651	pregnancy complications	74	15181	0.00487451
Malposition and malpresentation of fetus or obstruction	652	pregnancy complications	158	15181	0.0104077
Problems associated with amniotic cavity and membranes	653	pregnancy complications	106	15181	0.00698241
Other and unspecified complications of birth; puerperium affecting management of mother	654	pregnancy complications	176	15181	0.0115934
Abnormality of organs and soft tissues of pelvis complicating pregnancy, childbirth, or the puerperium	654.1	pregnancy complications	162	15181	0.0106712
Rhesus isoimmunization in pregnancy	654.2	pregnancy complications	33	15181	0.00217377
Known or suspected fetal abnormality affecting management of mother	655	pregnancy complications	347	15181	0.0228575
Abnormality in fetal heart rate or rhythm	655.1	pregnancy complications	54	15181	0.00355708
Other perinatal conditions of fetus or newborn	656	pregnancy complications	117	15181	0.007707
Isoimmunization of fetus or newborn	656.1	pregnancy complications	0	15181	0
Respiratory conditions of fetus and newborn	656.2	pregnancy complications	18	15181	0.00118569
Interstitial emphysema and related conditions of newborn	656.22	pregnancy complications	1	15181	6.58718e-05
Transitory tachypnea or apnea of newborn	656.26	pregnancy complications	2	15181	0.000131744
Endocrine and metabolic disturbances of fetus and newborn	656.3	pregnancy complications	18	15181	0.00118569
Hemorrhage of fetus or newborn	656.4	pregnancy complications	4	15181	0.000263487
Hematological disorders of newborn	656.5	pregnancy complications	4	15181	0.000263487
Perinatal disorders of digestive system	656.6	pregnancy complications	4	15181	0.000263487
Conditions involving the integument and temperature regulation of fetus and newborn	656.7	pregnancy complications	7	15181	0.000461103
Perinatal jaundice	656.8	pregnancy complications	18	15181	0.00118569
Neonatal bradycardia or tachycardia	656.9	pregnancy complications	0	15181	0
Infections specific to the perinatal period	657	pregnancy complications	8	15181	0.000526975
Maternal complication of pregnancy affecting fetus or newborn	658	pregnancy complications	38	15181	0.00250313
Fetal distress and abnormal forces of labor	661	pregnancy complications	166	15181	0.0109347
Umbilical cord complications during labor and delivery	663	pregnancy complications	109	15181	0.00718003
Obstetrical/birth trauma	665	pregnancy complications	304	15181	0.020025
Complications of the administration of anesthetic or other sedation in labor and delivery	668	pregnancy complications	2	15181	0.000131744
Complications of labor and delivery NEC	669	pregnancy complications	77	15181	0.00507213
Venous/cerebrovascular complications embolism in pregnancy and the puerperium	671	pregnancy complications	23	15181	0.00151505
Other complications of the puerperium NEC	674	pregnancy complications	40	15181	0.00263487
Other disorders of the breast associated with childbirth and disorders of lactation	676	pregnancy complications	16	15181	0.00105395
Superficial cellulitis and abscess	681	dermatologic	741	15181	0.048811
Cellulitis and abscess of fingers/toes	681.1	dermatologic	454	15181	0.0299058
Cellulitis and abscess of face/neck	681.2	dermatologic	157	15181	0.0103419
Cellulitis and abscess of arm/hand	681.3	dermatologic	283	15181	0.0186417
Cellulitis and abscess of leg, except foot	681.5	dermatologic	503	15181	0.0331335
Cellulitis and abscess of foot, toe	681.6	dermatologic	141	15181	0.00928793
Cellulitis and abscess of trunk	681.7	dermatologic	234	15181	0.015414
Other local infections of skin and subcutaneous tissue	686	dermatologic	291	15181	0.0191687
Carbuncle and furuncle	686.1	dermatologic	176	15181	0.0115934
Impetigo	686.2	dermatologic	157	15181	0.0103419
Pilonidal cyst	686.3	dermatologic	52	15181	0.00342533
Pyogenic granuloma	686.4	dermatologic	58	15181	0.00382057
Pyoderma	686.5	dermatologic	22	15181	0.00144918
Symptoms affecting skin	687	dermatologic	224	15181	0.0147553
Rash and other nonspecific skin eruption	687.1	dermatologic	1293	15181	0.0851723
Localized superficial swelling, mass, or lump	687.2	dermatologic	458	15181	0.0301693
Changes in skin texture	687.3	dermatologic	26	15181	0.00171267
Disturbance of skin sensation	687.4	dermatologic	1740	15181	0.114617
Disorder of skin and subcutaneous tissue NOS	689	dermatologic	1715	15181	0.11297
Erythematosquamous dermatosis	690	dermatologic	15	15181	0.000988077
Seborrheic dermatitis	690.1	dermatologic	424	15181	0.0279296
Congenital anomalies of skin	691	dermatologic	111	15181	0.00731177
Ichthyosis congenita	691.1	dermatologic	8	15181	0.000526975
Congenital pigmentary anomalies of skin	691.3	dermatologic	21	15181	0.00138331
Dyschromia and Vitiligo	694	dermatologic	5	15181	0.000329359
Vitiligo	694.1	dermatologic	39	15181	0.002569
Other dyschromia	694.2	dermatologic	841	15181	0.0553982
Vascular disorders of skin	694.3	dermatologic	9	15181	0.000592846
Erythematous conditions	695	dermatologic	1	15181	6.58718e-05
Toxic erythema	695.1	dermatologic	19	15181	0.00125156
Bullous dermatoses	695.2	dermatologic	5	15181	0.000329359
Dermatitis herpetiformis	695.21	dermatologic	7	15181	0.000461103
Pemphigus and pemphigoid	695.22	dermatologic	10	15181	0.000658718
Rosacea	695.3	dermatologic	612	15181	0.0403135
Lupus (localized and systemic)	695.4	dermatologic	2	15181	0.000131744
Cutaneous lupus erythematosus	695.41	dermatologic	43	15181	0.00283249
Systemic lupus erythematosus	695.42	dermatologic	121	15181	0.00797049
Prurigo and Lichen	695.7	dermatologic	218	15181	0.0143601
Other specified erythematous conditions	695.8	dermatologic	187	15181	0.012318
Erythema nodosum	695.81	dermatologic	20	15181	0.00131744
Unspecified erythematous condition	695.9	dermatologic	66	15181	0.00434754
Psoriasis and related disorders	696	dermatologic	5	15181	0.000329359
Parapsoriasis	696.2	dermatologic	13	15181	0.000856334
Pityriasis	696.3	dermatologic	32	15181	0.0021079
Psoriasis	696.4	dermatologic	17	15181	0.00111982
Psoriasis vulgaris	696.41	dermatologic	419	15181	0.0276003
Psoriatic arthropathy	696.42	dermatologic	106	15181	0.00698241
Sarcoidosis	697	dermatologic	96	15181	0.00632369
Pruritus and related conditions	698	dermatologic	537	15181	0.0353732
Corns and callosities	700	dermatologic	378	15181	0.0248995
Other hypertrophic and atrophic conditions of skin	701	dermatologic	724	15181	0.0476912
Keratoderma, acquired	701.1	dermatologic	249	15181	0.0164021
Scar conditions and fibrosis of skin	701.2	dermatologic	353	15181	0.0232528
Circumscribed scleroderma	701.3	dermatologic	122	15181	0.00803636
Keloid scar	701.4	dermatologic	58	15181	0.00382057
Abnormal granulation tissue	701.5	dermatologic	39	15181	0.002569
Acquired acanthosis nigricans	701.6	dermatologic	77	15181	0.00507213
Degenerative skin conditions and other dermatoses	702	dermatologic	32	15181	0.0021079
Actinic keratosis	702.1	dermatologic	1710	15181	0.112641
Seborrheic keratosis	702.2	dermatologic	2410	15181	0.158751
Degenerative skin disorders	702.4	dermatologic	19	15181	0.00125156
Diseases of nail, NOS	703	dermatologic	453	15181	0.0298399
Ingrowing nail	703.1	dermatologic	443	15181	0.0291812
Diseases of hair and hair follicles	704	dermatologic	76	15181	0.00500626
Alopecia	704.1	dermatologic	287	15181	0.0189052
Alopecia Areata	704.11	dermatologic	38	15181	0.00250313
Telogen effluvium	704.12	dermatologic	27	15181	0.00177854
Hirsutism	704.2	dermatologic	110	15181	0.0072459
Other specified diseases of hair and hair follicles	704.8	dermatologic	267	15181	0.0175878
Disorders of sweat glands	705	dermatologic	20	15181	0.00131744
Dyshidrosis	705.1	dermatologic	44	15181	0.00289836
Hidradenitis	705.3	dermatologic	64	15181	0.0042158
Hyperhidrosis	705.8	dermatologic	259	15181	0.0170608
Diseases of sebaceous glands	706	dermatologic	34	15181	0.00223964
Acne	706.1	dermatologic	685	15181	0.0451222
Sebaceous cyst	706.2	dermatologic	979	15181	0.0644885
Seborrhea	706.3	dermatologic	19	15181	0.00125156
Other specified diseases of sebaceous glands	706.8	dermatologic	266	15181	0.0175219
Chronic ulcer of skin	707	dermatologic	0	15181	0
Decubitus ulcer	707.1	dermatologic	122	15181	0.00803636
Chronic ulcer of leg or foot	707.2	dermatologic	277	15181	0.0182465
Chronic ulcer of unspecified site	707.3	dermatologic	111	15181	0.00731177
Diffuse diseases of connective tissue	709	dermatologic	15	15181	0.000988077
Sicca syndrome	709.2	dermatologic	120	15181	0.00790462
Systemic sclerosis	709.3	dermatologic	76	15181	0.00500626
Polymyositis	709.4	dermatologic	8	15181	0.000526975
Dermatomyositis	709.5	dermatologic	19	15181	0.00125156
Other specified diffuse diseases of connective tissue	709.6	dermatologic	16	15181	0.00105395
Unspecified diffuse connective tissue disease	709.7	dermatologic	91	15181	0.00599434
Osteomyelitis, periostitis, and other infections involving bone	710	musculoskeletal	30	15181	0.00197615
Acute osteomyelitis	710.11	musculoskeletal	59	15181	0.00388644
Chronic osteomyelitis	710.12	musculoskeletal	56	15181	0.00368882
Unspecified osteomyelitis	710.19	musculoskeletal	129	15181	0.00849746
Periostitis	710.2	musculoskeletal	4	15181	0.000263487
Osteopathy resulting from poliomyelitis	710.3	musculoskeletal	1	15181	6.58718e-05
Arthropathy associated with infections	711	musculoskeletal	16	15181	0.00105395
Pyogenic arthritis	711.1	musculoskeletal	62	15181	0.00408405
Reiter's disease	711.2	musculoskeletal	10	15181	0.000658718
Behcet's syndrome	711.3	musculoskeletal	6	15181	0.000395231
Infective connective tissue disorders	712	musculoskeletal	22	15181	0.00144918
Arthropathy associated with other disorders classified elsewhere	713	musculoskeletal	12	15181	0.000790462
Arthropathy associated with neurological disorders	713.5	musculoskeletal	28	15181	0.00184441
Rheumatoid arthritis and other inflammatory polyarthropathies	714	musculoskeletal	261	15181	0.0171925
Rheumatoid arthritis	714.1	musculoskeletal	381	15181	0.0250972
Juvenile rheumatoid arthritis	714.2	musculoskeletal	39	15181	0.002569
Other inflammatory spondylopathies	715	musculoskeletal	53	15181	0.00349121
Sacroiliitis NEC	715.1	musculoskeletal	172	15181	0.01133
Ankylosing spondylitis	715.2	musculoskeletal	42	15181	0.00276662
Spinal enthesopathy	715.3	musculoskeletal	19	15181	0.00125156
Other arthropathies	716	musculoskeletal	36	15181	0.00237139
Unspecified polyarthropathy or polyarthritis	716.1	musculoskeletal	101	15181	0.00665305
Unspecified monoarthritis	716.2	musculoskeletal	23	15181	0.00151505
Kaschin-Beck disease	716.3	musculoskeletal	0	15181	0
Palindromic rheumatism	716.8	musculoskeletal	10	15181	0.000658718
Arthropathy NOS	716.9	musculoskeletal	885	15181	0.0582966
Polymyalgia Rheumatica	717	musculoskeletal	118	15181	0.00777287
Spinal stenosis	720	musculoskeletal	423	15181	0.0278638
Spinal stenosis of lumbar region	720.1	musculoskeletal	739	15181	0.0486793
Spondylosis and allied disorders	721	musculoskeletal	19	15181	0.00125156
Spondylosis without myelopathy	721.1	musculoskeletal	1796	15181	0.118306
Spondylosis with myelopathy	721.2	musculoskeletal	142	15181	0.0093538
Other allied disorders of spine	721.8	musculoskeletal	28	15181	0.00184441
Intervertebral disc disorders	722	musculoskeletal	5	15181	0.000329359
Displacement of intervertebral disc	722.1	musculoskeletal	930	15181	0.0612608
Schmorl's nodes	722.3	musculoskeletal	6	15181	0.000395231
Degeneration of intervertebral disc	722.6	musculoskeletal	1582	15181	0.104209
Intervertebral disc disorder with myelopathy	722.7	musculoskeletal	69	15181	0.00454516
Postlaminectomy syndrome	722.8	musculoskeletal	133	15181	0.00876095
Other and unspecified disc disorder	722.9	musculoskeletal	217	15181	0.0142942
Other disorders of cervical region	723	musculoskeletal	164	15181	0.010803
Torticollis	723.1	musculoskeletal	82	15181	0.00540149
Other and unspecified disorders of back	724	musculoskeletal	25	15181	0.0016468
Disorders of sacrum	724.1	musculoskeletal	153	15181	0.0100784
Disorders of coccyx	724.2	musculoskeletal	57	15181	0.00375469
Other symptoms referable to back	724.8	musculoskeletal	197	15181	0.0129767
Other unspecified back disorders	724.9	musculoskeletal	87	15181	0.00573085
Peripheral enthesopathies and allied syndromes	726	musculoskeletal	1929	15181	0.127067
Enthesopathy	726.1	musculoskeletal	2021	15181	0.133127
Synoviopathy	726.2	musculoskeletal	223	15181	0.0146894
Bursitis	726.3	musculoskeletal	522	15181	0.0343851
Calcaneal spur; Exostosis NOS	726.4	musculoskeletal	404	15181	0.0266122
Other disorders of synovium, tendon, and bursa	727	musculoskeletal	179	15181	0.0117911
Synovitis and tenosynovitis	727.1	musculoskeletal	1146	15181	0.0754891
Bursitis disorders	727.2	musculoskeletal	100	15181	0.00658718
Ganglion and cyst of synovium, tendon, and bursa	727.4	musculoskeletal	479	15181	0.0315526
Rupture of synovium	727.5	musculoskeletal	140	15181	0.00922205
Rupture of tendon, nontraumatic	727.6	musculoskeletal	261	15181	0.0171925
Contracture of tendon (sheath)	727.7	musculoskeletal	113	15181	0.00744351
Plica syndrome	727.8	musculoskeletal	15	15181	0.000988077
Disorders of muscle, ligament, and fascia	728	musculoskeletal	55	15181	0.00362295
Muscular calcification and ossification	728.1	musculoskeletal	17	15181	0.00111982
Laxity of ligament or hypermobility syndrome	728.2	musculoskeletal	132	15181	0.00869508
Fasciitis	728.7	musculoskeletal	773	15181	0.0509189
Contracture of palmar fascia [Dupuytren's disease]	728.71	musculoskeletal	89	15181	0.00586259
Other disorders of soft tissues	729	musculoskeletal	218	15181	0.0143601
Rheumatism, unspecified and fibrositis	729.1	musculoskeletal	23	15181	0.00151505
Panniculitis	729.3	musculoskeletal	20	15181	0.00131744
Nontraumatic compartment syndrome	729.7	musculoskeletal	6	15181	0.000395231
Osteitis deformans and osteopathies associated with other disorders classified elsewhere	731	musculoskeletal	16	15181	0.00105395
Osteitis deformans [Paget's disease of bone]	731.1	musculoskeletal	2	15181	0.000131744
Osteochondropathies	732	musculoskeletal	16	15181	0.00105395
Juvenile osteochondrosis	732.1	musculoskeletal	63	15181	0.00414992
Osteochondritis dissecans	732.7	musculoskeletal	29	15181	0.00191028
Other disorders of bone and cartilage	733	musculoskeletal	704	15181	0.0463738
Cyst of bone	733.2	musculoskeletal	41	15181	0.00270074
Aseptic necrosis of bone	733.4	musculoskeletal	88	15181	0.00579672
Costochondritis	733.6	musculoskeletal	79	15181	0.00520387
Malunion and nonunion of fracture	733.8	musculoskeletal	80	15181	0.00526975
Chondromalacia	733.9	musculoskeletal	33	15181	0.00217377
Acquired foot deformities	735	musculoskeletal	287	15181	0.0189052
Flat foot	735.1	musculoskeletal	262	15181	0.0172584
Acquired toe deformities	735.2	musculoskeletal	60	15181	0.00395231
Hammer toe (acquired)	735.21	musculoskeletal	298	15181	0.0196298
Claw toe (acquired)	735.22	musculoskeletal	14	15181	0.000922205
Hallux rigidus	735.23	musculoskeletal	138	15181	0.00909031
Hallux valgus (Bunion)	735.3	musculoskeletal	508	15181	0.0334629
Other acquired deformities of limbs	736	musculoskeletal	48	15181	0.00316185
Acquired deformities of forearm	736.1	musculoskeletal	14	15181	0.000922205
Acquired deformities of finger	736.2	musculoskeletal	67	15181	0.00441341
Acquired deformities of hip	736.3	musculoskeletal	6	15181	0.000395231
Genu valgum or varum (acquired)	736.4	musculoskeletal	53	15181	0.00349121
Acquired deformities of knee	736.5	musculoskeletal	10	15181	0.000658718
Unequal leg length (acquired)	736.6	musculoskeletal	40	15181	0.00263487
Curvature of spine	737	musculoskeletal	31	15181	0.00204203
Kyphosis (acquired)	737.1	musculoskeletal	74	15181	0.00487451
Lordosis (acquired)	737.2	musculoskeletal	6	15181	0.000395231
Kyphoscoliosis and scoliosis	737.3	musculoskeletal	567	15181	0.0373493
Other acquired musculoskeletal deformity	738	musculoskeletal	99	15181	0.00652131
Acquired spondylolisthesis	738.4	musculoskeletal	333	15181	0.0219353
Contracture of joint	739	musculoskeletal	123	15181	0.00810223
Osteoarthrosis	740	musculoskeletal	58	15181	0.00382057
Osteoarthritis; localized	740.1	musculoskeletal	1607	15181	0.105856
Osteoarthrosis, localized, primary	740.11	musculoskeletal	2226	15181	0.146631
Osteoarthrosis, localized, secondary	740.12	musculoskeletal	71	15181	0.0046769
Osteoarthrosis, generalized	740.2	musculoskeletal	504	15181	0.0331994
Osteoarthrosis involving more than one site, but not specified as generalized	740.3	musculoskeletal	73	15181	0.00480864
Osteoarthrosis NOS	740.9	musculoskeletal	2533	15181	0.166853
Symptoms and disorders of the joints	741	musculoskeletal	601	15181	0.039589
Ankylosis of joint	741.1	musculoskeletal	46	15181	0.0030301
Stiffness of joint	741.2	musculoskeletal	918	15181	0.0604703
Difficulty in walking	741.3	musculoskeletal	553	15181	0.0364271
Joint effusions	741.4	musculoskeletal	694	15181	0.045715
Hemarthrosis	741.5	musculoskeletal	22	15181	0.00144918
Villonodular synovitis	741.6	musculoskeletal	10	15181	0.000658718
Derangement of joint, non-traumatic	742	musculoskeletal	3	15181	0.000197615
Loose body in joint	742.1	musculoskeletal	21	15181	0.00138331
Pathological, developmental or recurrent dislocation	742.2	musculoskeletal	47	15181	0.00309598
Articular cartilage disorder	742.8	musculoskeletal	20	15181	0.00131744
Other derangement of joint	742.9	musculoskeletal	438	15181	0.0288519
Osteoporosis, osteopenia and pathological fracture	743	musculoskeletal	39	15181	0.002569
Osteoporosis	743.1	musculoskeletal	26	15181	0.00171267
Osteoporosis NOS	743.11	musculoskeletal	1265	15181	0.0833278
Senile osteoporosis	743.12	musculoskeletal	221	15181	0.0145577
Other specified osteoporosis	743.13	musculoskeletal	223	15181	0.0146894
Pathologic fracture	743.2	musculoskeletal	147	15181	0.00968316
Pathologic fracture of vertebrae	743.21	musculoskeletal	133	15181	0.00876095
Pathologic fracture of femur	743.22	musculoskeletal	18	15181	0.00118569
Stress fracture	743.4	musculoskeletal	88	15181	0.00579672
Osteopenia or other disorder of bone and cartilage	743.9	musculoskeletal	1542	15181	0.101574
Pain in joint	745	musculoskeletal	7015	15181	0.462091
Cardiac and circulatory congenital anomalies	747	congenital anomalies	44	15181	0.00289836
Cardiac congenital anomalies	747.1	congenital anomalies	105	15181	0.00691654
Cardiac shunt/ heart septal defect	747.11	congenital anomalies	233	15181	0.0153481
Valvular heart disease/ heart chambers	747.12	congenital anomalies	187	15181	0.012318
Congenital anomalies of great vessels	747.13	congenital anomalies	78	15181	0.005138
Congenital anomalies of peripheral vascular system	747.2	congenital anomalies	76	15181	0.00500626
Anomalies of respiratory system, congenital	748	congenital anomalies	42	15181	0.00276662
Congenital anomalies of face and neck	749	congenital anomalies	81	15181	0.00533562
Cleft palate	749.1	congenital anomalies	33	15181	0.00217377
Congenital anomalies of skull and face bones	749.2	congenital anomalies	72	15181	0.00474277
Digestive congenital anomalies	750	congenital anomalies	0	15181	0
Upper gastrointestinal congenital anomalies	750.1	congenital anomalies	5	15181	0.000329359
Esophageal atresia/tracheoesophageal fistula	750.11	congenital anomalies	15	15181	0.000988077
Congenital anomalies of mouth/tongue	750.13	congenital anomalies	37	15181	0.00243726
Congenital anomalies of esophagus	750.14	congenital anomalies	5	15181	0.000329359
Congenital anomalies of stomach	750.15	congenital anomalies	5	15181	0.000329359
Lower gastrointestinal congenital anomalies	750.2	congenital anomalies	0	15181	0
Congenital anomalies of intestine	750.21	congenital anomalies	55	15181	0.00362295
Congenital anomaly of gallbladder, bile ducts, liver, pancreas	750.22	congenital anomalies	32	15181	0.0021079
Congenital hypertrophic pyloric stenosis	750.5	congenital anomalies	0	15181	0
Genitourinary congenital anomalies	751	congenital anomalies	4	15181	0.000263487
Congenital anomalies of genital organs	751.1	congenital anomalies	8	15181	0.000526975
Congenital anomalies of female genital organs	751.11	congenital anomalies	30	15181	0.00197615
Congenital anomalies of male genital organs	751.12	congenital anomalies	70	15181	0.00461103
Congenital anomalies of urinary system	751.2	congenital anomalies	16	15181	0.00105395
Cystic kidney disease	751.21	congenital anomalies	167	15181	0.0110006
Other specified congenital anomalies of kidney	751.22	congenital anomalies	56	15181	0.00368882
Obstructive genitourinary defect	751.3	congenital anomalies	28	15181	0.00184441
Nervous system congenital anomalies	752	congenital anomalies	14	15181	0.000922205
Neural tube defects	752.1	congenital anomalies	8	15181	0.000526975
Spina bifida	752.11	congenital anomalies	29	15181	0.00191028
Other specified congenital anomalies of nervous system	752.2	congenital anomalies	61	15181	0.00401818
Congenital anomalies of the eye	753	congenital anomalies	29	15181	0.00191028
Congenital cataract and lens anomalies	753.1	congenital anomalies	25	15181	0.0016468
Congenital anomalies of posterior segment of eye	753.2	congenital anomalies	16	15181	0.00105395
Congenital musculoskeletal deformities of spine	754	congenital anomalies	32	15181	0.0021079
Lumbosacral spondylolysis, congenital	754.1	congenital anomalies	9	15181	0.000592846
Spondylolisthesis, congenital	754.2	congenital anomalies	84	15181	0.00553323
Congenital anomalies of limbs	755	congenital anomalies	2	15181	0.000131744
Congenital deformities of feet	755.1	congenital anomalies	107	15181	0.00704828
Congenital anomaly of fingers/toes	755.3	congenital anomalies	15	15181	0.000988077
Congenital anomalies of upper limb, including shoulder girdle	755.4	congenital anomalies	14	15181	0.000922205
Other congenital anomalies of lower limb, including pelvic girdle	755.6	congenital anomalies	12	15181	0.000790462
Congenital hip dysplasia and deformity	755.61	congenital anomalies	45	15181	0.00296423
Other congenital musculoskeletal anomalies	756	congenital anomalies	7	15181	0.000461103
Congenital anomalies of abdominal wall; diaphram	756.1	congenital anomalies	16	15181	0.00105395
Pectus and other congenital anomalies of ribs/sternum	756.2	congenital anomalies	1	15181	6.58718e-05
Pectus excavatum	756.21	congenital anomalies	171	15181	0.0112641
Pectus carinatum	756.22	congenital anomalies	8	15181	0.000526975
Congenital anomalies of muscle, tendon, fascia, and connective tissue	756.3	congenital anomalies	128	15181	0.00843159
Congenital osteodystrophies	756.5	congenital anomalies	57	15181	0.00375469
Congenital anomalies of the integument	757	congenital anomalies	35	15181	0.00230551
Chromosomal anomalies and genetic disorders	758	congenital anomalies	32	15181	0.0021079
Chromosomal anomalies	758.1	congenital anomalies	82	15181	0.00540149
Other and unspecified congenital anomalies	759	congenital anomalies	139	15181	0.00915618
Anomalies of endocrine glands, congenital	759.1	congenital anomalies	17	15181	0.00111982
Back pain	760	symptoms	4638	15181	0.305513
Cervicalgia	761	symptoms	2221	15181	0.146301
Thoracic or lumbosacral neuritis or radiculitis, unspecified	763	symptoms	1207	15181	0.0795073
Sciatica	764	symptoms	955	15181	0.0629076
Cervical radiculitis	765	symptoms	644	15181	0.0424214
Neuralgia, neuritis, and radiculitis NOS	766	symptoms	419	15181	0.0276003
Cervicocranial/Cervicobrachial syndrome	767	symptoms	40	15181	0.00263487
Nonallopathic lesions NEC	769	symptoms	427	15181	0.0281273
Myalgia and myositis unspecified	770	symptoms	1642	15181	0.108162
Musculoskeletal symptoms referable to limbs	771	symptoms	318	15181	0.0209472
Swelling of limb	771.1	symptoms	849	15181	0.0559252
Cramp of limb	771.2	symptoms	196	15181	0.0129109
Symptoms of the muscles	772	symptoms	276	15181	0.0181806
Muscular wasting and disuse atrophy	772.1	symptoms	62	15181	0.00408405
Spasm of muscle	772.2	symptoms	536	15181	0.0353073
Muscle weakness	772.3	symptoms	897	15181	0.059087
Rhabdomyolysis	772.4	symptoms	34	15181	0.00223964
Facial weakness	772.6	symptoms	54	15181	0.00355708
Pain in limb	773	symptoms	4673	15181	0.307819
Hypothermia/Chills	780	symptoms	33	15181	0.00217377
Symptoms involving nervous and musculoskeletal systems	781	symptoms	281	15181	0.01851
Loss of height	781.1	symptoms	42	15181	0.00276662
Abnormal posture	781.2	symptoms	75	15181	0.00494039
Symptoms involving skin and other integumentary tissue	782	symptoms	26	15181	0.00171267
Edema	782.3	symptoms	1580	15181	0.104077
Pallor and flushing	782.6	symptoms	137	15181	0.00902444
Fever of unknown origin	783	symptoms	1458	15181	0.0960411
Postprocedural fever	783.1	symptoms	22	15181	0.00144918
Abdominal pain	785	symptoms	5268	15181	0.347013
Syncope and collapse	788	symptoms	1204	15181	0.0793097
Nausea and vomiting	789	symptoms	2187	15181	0.144062
Persistent vomiting	789.1	symptoms	35	15181	0.00230551
Nonspecific findings on examination of blood	790	symptoms	188	15181	0.0123839
Elevated sedimentation rate	790.1	symptoms	53	15181	0.00349121
Other abnormal blood chemistry	790.6	symptoms	1363	15181	0.0897833
Elevated C-reactive protein (CRP)	790.8	symptoms	47	15181	0.00309598
Abnormal arterial blood gases	790.9	symptoms	2	15181	0.000131744
Gangrene	791	symptoms	30	15181	0.00197615
Abnormal Papanicolaou smear of cervix and cervical HPV	792	genitourinary	327	15181	0.0215401
Papanicolaou smear of cervix or vagina with atypical squamous cells	792.1	genitourinary	174	15181	0.0114617
Nonspecific abnormal findings on radiological and other examination of musculoskeletal system	793	symptoms	132	15181	0.00869508
Nonspecific abnormal findings on radiological and other examination of other intrathoracic organs (echocardiogram, etc)	793.2	symptoms	355	15181	0.0233845
Abnormal results of other function studies (bladder, pancreas, placenta, spleen, etc)	794	symptoms	36	15181	0.00237139
Other and nonspecific abnormal cytological, histological and immunological findings	795	symptoms	26	15181	0.00171267
Abnormal tumor markers	795.8	symptoms	12	15181	0.000790462
Elevated carcinoembryonic antigen [CEA]	795.81	symptoms	28	15181	0.00184441
Elevated cancer antigen 125 [CA 125]	795.82	symptoms	26	15181	0.00171267
Elevated prostate specific antigen [PSA]	796	genitourinary	702	15181	0.046242
Shock	797	symptoms	76	15181	0.00500626
Cardiogenic shock	797.1	symptoms	66	15181	0.00434754
Malaise and fatigue	798	symptoms	4070	15181	0.268098
Chronic fatigue syndrome	798.1	symptoms	168	15181	0.0110665
Debility unspecified	799	symptoms	217	15181	0.0142942
Fracture of lower limb	800	injuries & poisonings	226	15181	0.014887
Fracture of neck of femur	800.1	injuries & poisonings	134	15181	0.00882682
Fracture of unspecified part of femur	800.2	injuries & poisonings	102	15181	0.00671892
Fracture of tibia and fibula	800.3	injuries & poisonings	179	15181	0.0117911
Fracture of patella	800.4	injuries & poisonings	92	15181	0.00606021
Fracture of ankle and foot	801	injuries & poisonings	540	15181	0.0355708
Fracture of foot	801.1	injuries & poisonings	340	15181	0.0223964
Fracture of pelvis	802	injuries & poisonings	78	15181	0.005138
Fracture of upper limb	803	injuries & poisonings	242	15181	0.015941
Fracture of humerus	803.1	injuries & poisonings	222	15181	0.0146235
Fracture of radius and ulna	803.2	injuries & poisonings	480	15181	0.0316185
Colles' fracture	803.21	injuries & poisonings	56	15181	0.00368882
Fracture of clavicle or scapula	803.3	injuries & poisonings	113	15181	0.00744351
Fracture of hand or wrist	804	injuries & poisonings	532	15181	0.0350438
Fracture of vertebral column without mention of spinal cord injury	805	injuries & poisonings	284	15181	0.0187076
Fracture of ribs	807	injuries & poisonings	213	15181	0.0140307
Fracture of unspecified bones	809	injuries & poisonings	899	15181	0.0592188
Cerebral laceration and contusion	816	injuries & poisonings	11	15181	0.00072459
Concussion	817	injuries & poisonings	187	15181	0.012318
Intracranial hemorrhage (injury)	818	injuries & poisonings	26	15181	0.00171267
Subdural hemorrhage (injury)	818.1	injuries & poisonings	35	15181	0.00230551
Subarachnoid hemorrhage (injury)	818.2	injuries & poisonings	18	15181	0.00118569
Skull and face fracture and other intercranial injury	819	injuries & poisonings	242	15181	0.015941
Torus fracture	823	injuries & poisonings	0	15181	0
Dislocation	830	injuries & poisonings	993	15181	0.0654107
Internal derangement of knee	835	injuries & poisonings	924	15181	0.0608656
Traumatic arthropathy	836	injuries & poisonings	85	15181	0.0055991
Sprains and strains	840	injuries & poisonings	1841	15181	0.12127
Muscle/tendon sprain	840.1	injuries & poisonings	87	15181	0.00573085
Rotator cuff (capsule) sprain	840.2	injuries & poisonings	333	15181	0.0219353
Joint/ligament sprain	840.3	injuries & poisonings	405	15181	0.0266781
Sprains and strains of back and neck	841	injuries & poisonings	939	15181	0.0618536
Other sprains and strains	842	injuries & poisonings	106	15181	0.00698241
Hemorrhage or hematoma complicating a procedure	850	injuries & poisonings	255	15181	0.0167973
Complications of transplants and reattached limbs	851	injuries & poisonings	292	15181	0.0192346
Complication of colostomy or enterostomy	853	injuries & poisonings	58	15181	0.00382057
Complications of cardiac/vascular device, implant, and graft	854	injuries & poisonings	286	15181	0.0188393
Complication of nervous system device, implant, and graft	855	injuries & poisonings	22	15181	0.00144918
Vascular complications of surgery and medical procedures	856	injuries & poisonings	28	15181	0.00184441
Mechanical complication of unspecified genitourinary device, implant, and graft	857	injuries & poisonings	62	15181	0.00408405
Complication of internal orthopedic device	858	injuries & poisonings	259	15181	0.0170608
Complication due to other implant and internal device	859	injuries & poisonings	170	15181	0.0111982
Bone marrow or stem cell transplant	860	neoplasms	91	15181	0.00599434
Open wounds of head; neck; and trunk	870	injuries & poisonings	234	15181	0.015414
Open wound or laceration of eye or eyelid	870.1	injuries & poisonings	32	15181	0.0021079
Open wound of ear	870.2	injuries & poisonings	18	15181	0.00118569
Other open wound of head and face	870.3	injuries & poisonings	212	15181	0.0139648
Open wound of nose and sinus	870.4	injuries & poisonings	24	15181	0.00158092
Open wound of lip and mouth	870.5	injuries & poisonings	27	15181	0.00177854
Open wound of neck	870.6	injuries & poisonings	6	15181	0.000395231
Open wound of genital organs	870.8	injuries & poisonings	4	15181	0.000263487
Open wounds of extremities	871	injuries & poisonings	363	15181	0.0239115
Open wound of hand except finger(s)	871.1	injuries & poisonings	168	15181	0.0110665
Open wound of finger(s)	871.2	injuries & poisonings	435	15181	0.0286542
Open wound of foot except toe(s) alone	871.3	injuries & poisonings	85	15181	0.0055991
Open wound of toe(s)	871.4	injuries & poisonings	64	15181	0.0042158
Traumatic amputation	872	injuries & poisonings	49	15181	0.00322772
Broken tooth	873	injuries & poisonings	94	15181	0.00619195
Complication of amputation stump	874	injuries & poisonings	18	15181	0.00118569
Non-healing surgical wound	875	injuries & poisonings	61	15181	0.00401818
Posttraumatic wound infection not elsewhere classified	876	injuries & poisonings	55	15181	0.00362295
Late effects of musculoskeletal and connective tissue injuries	905	injuries & poisonings	0	15181	0
Injuries to the nervous system	907	injuries & poisonings	97	15181	0.00638957
Late effects of other injuries	908	injuries & poisonings	0	15181	0
Late effects of external causes	909	injuries & poisonings	0	15181	0
Superficial injury, infected	910	injuries & poisonings	13	15181	0.000856334
Blister	911	injuries & poisonings	34	15181	0.00223964
Insect bite	912	injuries & poisonings	210	15181	0.0138331
Toxic effect of venom	913	injuries & poisonings	85	15181	0.0055991
Superficial injury without mention of infection	915	injuries & poisonings	721	15181	0.0474936
Contusion	916	injuries & poisonings	1566	15181	0.103155
Allergic reaction to food	930	injuries & poisonings	344	15181	0.0226599
Contact dermatitis and other eczema due to plants [except food]	931	dermatologic	137	15181	0.00902444
Dermatitis due to solar radiation	938	dermatologic	159	15181	0.0104736
Acute dermatitis due to solar radiation	938.1	dermatologic	95	15181	0.00625782
Chronic dermatitis due to solar radiation	938.2	dermatologic	340	15181	0.0223964
Atopic/contact dermatitis due to other or unspecified	939	dermatologic	2639	15181	0.173836
Contact and allergic dermatitis of eyelid	939.1	dermatologic	26	15181	0.00171267
Adverse reaction to serum or vaccine	941	injuries & poisonings	48	15181	0.00316185
Infusion and transfusion reaction	942	injuries & poisonings	14	15181	0.000922205
Anaphylactic shock NOS	946	injuries & poisonings	140	15181	0.00922205
Urticaria	947	dermatologic	422	15181	0.0277979
Allergies, other	949	injuries & poisonings	595	15181	0.0391937
Diaper or napkin rash	949.1	injuries & poisonings	51	15181	0.00335946
Spinal cord injury without evidence of spinal bone injury	952	injuries & poisonings	23	15181	0.00151505
Injury to other and unspecified nerves	957	injuries & poisonings	3	15181	0.000197615
Certain early complications of trauma or procedure	958	injuries & poisonings	27	15181	0.00177854
Postoperative shock	958.1	injuries & poisonings	12	15181	0.000790462
Traumatic and surgical subcutaneous emphysema	958.2	injuries & poisonings	21	15181	0.00138331
Poisoning by antibiotics	960	injuries & poisonings	165	15181	0.0108688
Adverse effects of antibacterials (not penicillins)	960.1	injuries & poisonings	16	15181	0.00105395
Allergy/adverse effect of penicillin	960.2	injuries & poisonings	199	15181	0.0131085
Poisoning by antifungal antibiotics	960.3	injuries & poisonings	0	15181	0
Poisoning by other anti-infectives	961	injuries & poisonings	20	15181	0.00131744
Poisoning/allergy of sulfonamides	961.1	injuries & poisonings	130	15181	0.00856334
Poisoning by hormones and synthetic substitutes	962	injuries & poisonings	4	15181	0.000263487
Adrenal cortical steroids causing adverse effects in therapeutic use	962.1	injuries & poisonings	55	15181	0.00362295
Insulins and antidiabetic agents causing adverse effects in therapeutic use	962.2	injuries & poisonings	12	15181	0.000790462
Hormones and synthetic substitutes causing adverse effects in therapeutic use	962.3	injuries & poisonings	36	15181	0.00237139
Poisoning by primarily systemic agents	963	injuries & poisonings	14	15181	0.000922205
Antineoplastic and immunosuppressive drugs causing adverse effects	963.1	injuries & poisonings	221	15181	0.0145577
Poisoning by agents primarily affecting blood constituents	964	injuries & poisonings	3	15181	0.000197615
Anticoagulants causing adverse effects	964.1	injuries & poisonings	43	15181	0.00283249
Poisoning by analgesics, antipyretics, and antirheumatics	965	injuries & poisonings	97	15181	0.00638957
Opiates and related narcotics causing adverse effects in therapeutic use	965.1	injuries & poisonings	121	15181	0.00797049
Antirheumatics causing adverse effects in therapeutic use	965.2	injuries & poisonings	2	15181	0.000131744
Salicylates causing adverse effects in therapeutic use	965.3	injuries & poisonings	2	15181	0.000131744
Poisoning by anticonvulsants and anti-Parkinsonism drugs	966	injuries & poisonings	11	15181	0.00072459
Adverse effects of sedatives or other central nervous system depressants and anesthetics	967	injuries & poisonings	47	15181	0.00309598
Poisoning by psychotropic agents	969	injuries & poisonings	49	15181	0.00322772
Poisoning by drugs primarily affecting the autonomic nervous system	971	injuries & poisonings	13	15181	0.000856334
Poisoning by agents primarily affecting the cardiovascular system	972	injuries & poisonings	18	15181	0.00118569
Cardiac rhythm regulators causing adverse effects in therapeutic use	972.1	injuries & poisonings	11	15181	0.00072459
Antilipemic and antiarteriosclerotic drugs causing adverse effects in therapeutic use	972.2	injuries & poisonings	3	15181	0.000197615
Antihypertensive agents causing adverse effects	972.6	injuries & poisonings	9	15181	0.000592846
Poisoning by agents primarily affecting the gastrointestinal system	973	injuries & poisonings	2	15181	0.000131744
Poisoning by water, mineral, and uric acid metabolism drugs	974	injuries & poisonings	24	15181	0.00158092
Poisoning by agents primarily acting on the smooth and skeletal muscles and respiratory system	975	injuries & poisonings	8	15181	0.000526975
Poisoning by agents primarily affecting skin & mucous membrane, ophthalmological, otorhinolaryngological, & dental drugs	976	injuries & poisonings	4	15181	0.000263487
Personal history of allergy to medicinal agents	977	injuries & poisonings	328	15181	0.021606
Adverse drug events and drug allergies	979	injuries & poisonings	587	15181	0.0386668
Encounter for long-term (current) use of antibiotics	980	infectious diseases	171	15181	0.0112641
Toxic effect of (non-ethyl) alcohol and petroleum and other solvents	981	injuries & poisonings	6	15181	0.000395231
Toxic effect of corrosive aromatics, acids, and caustic alkalis	983	injuries & poisonings	0	15181	0
Toxic effect of lead and its compounds (including fumes)	984	injuries & poisonings	12	15181	0.000790462
Toxic effect of other metals	985	injuries & poisonings	11	15181	0.00072459
Toxic effect of carbon monoxide	986	injuries & poisonings	1	15181	6.58718e-05
Toxic effect of other gases, fumes, or vapors	987	injuries & poisonings	2	15181	0.000131744
Toxic effect of noxious substances eaten as food	988	injuries & poisonings	1	15181	6.58718e-05
Toxic effect of other substances, chiefly nonmedicinal as to source	989	injuries & poisonings	11	15181	0.00072459
Effects radiation NOS	990	injuries & poisonings	222	15181	0.0146235
Sepsis and SIRS	994	injuries & poisonings	0	15181	0
Systemic inflammatory response syndrome (SIRS)	994.1	injuries & poisonings	65	15181	0.00428167
Sepsis	994.2	injuries & poisonings	296	15181	0.0194981
Septic shock	994.21	injuries & poisonings	69	15181	0.00454516
Complications peculiar to certain specified procedures	996	injuries & poisonings	2	15181	0.000131744

## Sheet: S3. 37psych phecodes
phenotype	phecode	category	n_case	n_total	prevalence	prop_case_female	prop_ctrl_female	age_case_median	age_case_min	age_case_max	age_ctrl_median	age_ctrl_min	age_ctrl_max
Tobacco use disorder	318	mental disorders	2783	15181	0.183321	0.514912	0.551541	66	20	98	62	6	100
Depression	296.2	mental disorders	2590	15181	0.170608	0.681467	0.516718	64	15	98	62	6	100
Anxiety disorder	300.1	mental disorders	2585	15181	0.170279	0.659574	0.521277	60	9	99	63	6	100
Major depressive disorder	296.22	mental disorders	2312	15181	0.152296	0.697232	0.517445	63	10	99	62	6	100
Other mental disorder	306	mental disorders	1759	15181	0.115869	0.52473	0.547459	59	6	90	63	7	100
Adjustment reaction	304	mental disorders	1405	15181	0.0925499	0.712456	0.527729	62	9	98	63	6	100
Attention deficit hyperactivity disorder	313.1	mental disorders	1164	15181	0.0766748	0.367698	0.559535	21	7	88	64	6	100
Generalized anxiety disorder	300.11	mental disorders	1024	15181	0.0674527	0.670898	0.535707	52	10	98	63	6	100
Autism	313.3	mental disorders	572	15181	0.0376787	0.206294	0.558081	18	7	50	63	6	100
Dysthymic disorder	300.4	mental disorders	536	15181	0.0353073	0.68097	0.539843	64	14	94	62	6	100
Mood disorders	296	mental disorders	487	15181	0.0320796	0.585216	0.543487	55	11	92	63	6	100
Substance addiction and disorders	316	mental disorders	446	15181	0.0293788	0.524664	0.545436	57	14	87	63	6	100
Bipolar	296.1	mental disorders	397	15181	0.0261511	0.649874	0.542005	50	15	98	63	6	100
Agorophobia, social phobia, and panic disorder	300.12	mental disorders	378	15181	0.0248995	0.693122	0.541039	57.5	12	98	63	6	100
Developmental delays and disorders	315	mental disorders	367	15181	0.024175	0.283379	0.551303	17	6	80	63	7	100
Altered mental status	292.4	mental disorders	359	15181	0.023648	0.462396	0.546822	70	13	96	62	6	100
Alcoholism	317.1	mental disorders	334	15181	0.0220012	0.39521	0.548192	62	16	90	62	6	100
Alcohol-related disorders	317	mental disorders	314	15181	0.0206838	0.410828	0.547656	63	23	89	62	6	100
Speech and language disorder	315.2	mental disorders	278	15181	0.0183124	0.276978	0.549822	16	6	91	63	7	100
Conduct disorders	312	mental disorders	248	15181	0.0163362	0.330645	0.548383	19	7	80	63	6	100
Posttraumatic stress disorder	300.9	mental disorders	232	15181	0.0152823	0.737069	0.541842	53	15	83	63	6	100
Acute reaction to stress	300.8	mental disorders	218	15181	0.0143601	0.770642	0.541536	66	23	90	62	6	100
Eating disorder	305.2	mental disorders	198	15181	0.0130426	0.742424	0.542215	53.5	9	90	63	6	100
Obsessive-compulsive disorders	300.3	mental disorders	181	15181	0.0119228	0.569061	0.544533	30	13	86	63	6	100
Alteration of consciousness	291.8	mental disorders	173	15181	0.0113958	0.531792	0.544976	67	14	92	62	6	100
Learning disorder	315.1	mental disorders	171	15181	0.0112641	0.374269	0.546769	20	8	88	63	6	100
Mental disorders during/after pregnancy	306.1	mental disorders	149	15181	0.0098149	0.986577	0.540447	31	21	78	63	6	100
Anxiety disorders	300	mental disorders	139	15181	0.00915618	0.604317	0.544276	57	7	83	63	6	100
Dementias	290.1	mental disorders	132	15181	0.00869508	0.401515	0.546083	79	23	98	62	6	100
Somatoform disorder	303.4	mental disorders	130	15181	0.00856334	0.684615	0.543618	61	19	85	62	6	100
Mild cognitive impairment	292.2	mental disorders	123	15181	0.00810223	0.487805	0.545292	76	16	92	62	6	100
Mental retardation	315.3	mental disorders	123	15181	0.00810223	0.390244	0.546088	22	12	78	63	6	100
Suicidal ideation	297.1	mental disorders	119	15181	0.00783875	0.504202	0.545147	52	15	86	63	6	100
Tics and stuttering	313.2	mental disorders	115	15181	0.00757526	0.234783	0.547192	19	8	88	63	6	100
Personality disorders	301	mental disorders	113	15181	0.00744351	0.637168	0.544133	59	8	89	63	6	100
Antisocial/borderline personality disorder	301.2	mental disorders	95	15181	0.00625782	0.631579	0.544279	35	8	73	63	6	100
Psychosis	295.3	mental disorders	90	15181	0.00592846	0.488889	0.545159	60.5	13	90	62	6	100

## Sheet: S4. psych pheno corr
Pairwise correlation	Acute reaction to stress	p	Adjustment reaction	p	Agorophobia, social phobia, and panic disorder	p	Alcohol-related disorders	p	Alcoholism	p	Alteration of consciousness	p	Altered mental status	p	Antisocial/borderline personality disorder	p	Anxiety disorder	p	Anxiety disorders	p	Attention deficit hyperactivity disorder	p	Autism	p	Bipolar	p	Conduct disorders	p	Dementias	p	Depression	p	Developmental delays and disorders	p	Dysthymic disorder	p	Eating disorder	p	Generalized anxiety disorder	p	Learning disorder	p	Major depressive disorder	p	Mental disorders during/after pregnancy	p	Mental retardation	p	Mild cognitive impairment
Acute reaction to stress	1	-	0.158	1.05954e-85	0.066	3.97605e-16	0.037	5.35211e-06	0.042	1.86361e-07	0.018	0.0238426	0.007	0.407577	0.026	0.00165767	0.103	4.84818e-37	0.029	0.000337794	-0.016	0.0479201	-0.024	0.003251	0.025	0.00180552	-0.011	0.168104	0.019	0.0225372	0.112	2.92275e-43	-0.015	0.0578807	0.076	7.5405e-21	0.02	0.0124396	0.069	1.5686e-17	-0.008	0.346773	0.1	6.01369e-35	0.005	0.551626	0.001	0.85885	0.014
Adjustment reaction	0.158	1.05954e-85	1	-	0.108	1.3342e-40	0.089	2.77773e-28	0.084	4.45264e-25	0.049	1.28771e-09	0.054	4.17251e-11	0.064	2.91822e-15	0.221	1.16694e-166	0.07	9.79017e-18	-0.001	0.85568	-0.046	1.00691e-08	0.09	9.6966e-29	0.002	0.81698	0.012	0.149057	0.275	1.36699e-260	-0.021	0.0108782	0.178	4.32021e-108	0.075	1.25073e-20	0.184	6.16674e-116	-0.015	0.0700763	0.282	1.55096e-274	0.074	5.07941e-20	-0.011	0.170878	0.019
Agorophobia, social phobia, and panic disorder	0.066	3.97605e-16	0.108	1.3342e-40	1	-	0.099	4.36535e-34	0.068	3.80052e-17	0.035	1.98505e-05	0.022	0.00572064	0.084	4.44789e-25	0.221	1.52572e-167	0.069	1.78585e-17	0.014	0.0775458	-0.003	0.733964	0.104	1.63591e-37	0.003	0.734666	0.012	0.127968	0.165	1.00543e-92	0.011	0.190336	0.109	1.82675e-41	0.034	3.11704e-05	0.239	2.41137e-195	0.003	0.714155	0.195	1.6698e-129	0.031	0.000116996	-0.01	0.230771	0.023
Alcohol-related disorders	0.037	5.35211e-06	0.089	2.77773e-28	0.099	4.36535e-34	1	-	0.565	0	0.05	8.26225e-10	0.096	1.57088e-32	0.1	4.94812e-35	0.097	7.18778e-33	0.083	9.64122e-25	-0.014	0.0834882	-0.029	0.000394698	0.107	1.10489e-39	-0.008	0.338094	-0.004	0.653784	0.138	9.65547e-66	0.004	0.60089	0.085	8.90206e-26	0.024	0.00299763	0.07	7.37052e-18	-0.011	0.170441	0.16	1.48965e-87	0.018	0.0234222	-0.008	0.326018	0.002
Alcoholism	0.042	1.86361e-07	0.084	4.45264e-25	0.068	3.80052e-17	0.565	0	1	-	0.043	1.06139e-07	0.113	4.98788e-44	0.102	2.16654e-36	0.102	3.40129e-36	0.099	3.35359e-34	0.004	0.619129	-0.027	0.000761278	0.099	1.55673e-34	-0.009	0.283702	0.01	0.211677	0.138	6.73166e-66	0	0.97861	0.086	3.94517e-26	0.042	2.07464e-07	0.089	7.90329e-28	-0.007	0.355571	0.15	3.02111e-77	0.008	0.33389	-0.009	0.292361	0.016
Alteration of consciousness	0.018	0.0238426	0.049	1.28771e-09	0.035	1.98505e-05	0.05	8.26225e-10	0.043	1.06139e-07	1	-	0.224	2.36134e-172	0.047	9.44112e-09	0.049	1.82308e-09	0.048	2.57668e-09	-0.005	0.515176	-0.002	0.835104	0.045	3.77669e-08	0.006	0.478937	0.09	8.27435e-29	0.075	2.07779e-20	0.028	0.000687389	0.037	6.36517e-06	0.015	0.0644511	0.026	0.00163336	0.006	0.446245	0.062	3.10172e-14	0.008	0.31257	-0.01	0.231886	0.039
Altered mental status	0.007	0.407577	0.054	4.17251e-11	0.022	0.00572064	0.096	1.57088e-32	0.113	4.98788e-44	0.224	2.36134e-172	1	-	0.048	2.99399e-09	0.083	1.45961e-24	0.035	1.51699e-05	-0.011	0.190181	-0.01	0.204199	0.061	3.59861e-14	-0.006	0.432074	0.154	1.02e-80	0.103	2.19169e-37	0.049	1.67299e-09	0.043	1.12376e-07	0.02	0.0122965	0.036	9.53355e-06	0	0.982313	0.099	1.35193e-34	-0.015	0.0562546	-0.004	0.588246	0.092
Antisocial/borderline personality disorder	0.026	0.00165767	0.064	2.91822e-15	0.084	4.44789e-25	0.1	4.94812e-35	0.102	2.16654e-36	0.047	9.44112e-09	0.048	2.99399e-09	1	-	0.1	8.73882e-35	0.194	9.40346e-129	0.081	2.22151e-23	0.116	1.4765e-46	0.165	4.51248e-93	0.148	5.23202e-75	0.011	0.193139	0.077	1.53176e-21	0.085	5.58669e-26	0.084	2.09865e-25	0.116	1.15263e-46	0.092	7.78483e-30	0.023	0.00426954	0.092	7.7056e-30	0.043	1.20616e-07	0.123	1.74683e-52	0.002
Anxiety disorder	0.103	4.84818e-37	0.221	1.16694e-166	0.221	1.52572e-167	0.097	7.18778e-33	0.102	3.40129e-36	0.049	1.82308e-09	0.083	1.45961e-24	0.1	8.73882e-35	1	-	0.078	7.24522e-22	0.079	2.11612e-22	0.049	1.19235e-09	0.134	3.86297e-62	0.054	3.88869e-11	0.031	0.000121288	0.317	0	0.051	3.83538e-10	0.183	1.82451e-114	0.076	5.86045e-21	0.371	0	0.045	3.74347e-08	0.323	0	0.117	3.72708e-47	0.037	4.41105e-06	0.033
Anxiety disorders	0.029	0.000337794	0.07	9.79017e-18	0.069	1.78585e-17	0.083	9.64122e-25	0.099	3.35359e-34	0.048	2.57668e-09	0.035	1.51699e-05	0.194	9.40346e-129	0.078	7.24522e-22	1	-	0.029	0.000280354	0.043	1.39709e-07	0.097	5.16771e-33	0.059	5.28807e-13	0.036	1.08958e-05	0.111	1.05688e-42	0.048	3.51382e-09	0.09	7.54517e-29	0.074	4.96419e-20	0.076	5.55789e-21	0.016	0.0493597	0.109	1.2423e-41	0.04	1.10062e-06	0.061	6.86783e-14	0.038
Attention deficit hyperactivity disorder	-0.016	0.0479201	-0.001	0.85568	0.014	0.0775458	-0.014	0.0834882	0.004	0.619129	-0.005	0.515176	-0.011	0.190181	0.081	2.22151e-23	0.079	2.11612e-22	0.029	0.000280354	1	-	0.272	1.57286e-255	0.094	4.10786e-31	0.35	0	-0.016	0.0443184	0.008	0.314202	0.303	2.21588442159799e-319	0	0.987119	0.035	2.10233e-05	0.114	4.35869e-45	0.305	1.97626258336499e-323	0.022	0.00706792	0.009	0.268623	0.14	5.59975e-67	-0.007
Autism	-0.024	0.003251	-0.046	1.00691e-08	-0.003	0.733964	-0.029	0.000394698	-0.027	0.000761278	-0.002	0.835104	-0.01	0.204199	0.116	1.4765e-46	0.049	1.19235e-09	0.043	1.39709e-07	0.272	1.57286e-255	1	-	0.017	0.0317316	0.264	5.0616e-240	-0.015	0.0681221	-0.068	7.00188e-17	0.44	0	-0.025	0.00230554	0.029	0.000338055	0.054	2.04032e-11	0.189	1.16965e-121	-0.059	4.0099e-13	-0.02	0.0152104	0.264	4.18279e-240	-0.014
Bipolar	0.025	0.00180552	0.09	9.6966e-29	0.104	1.63591e-37	0.107	1.10489e-39	0.099	1.55673e-34	0.045	3.77669e-08	0.061	3.59861e-14	0.165	4.51248e-93	0.134	3.86297e-62	0.097	5.16771e-33	0.094	4.10786e-31	0.017	0.0317316	1	-	0.09	1.9579e-28	0.025	0.00237041	0.154	3.94772e-81	0.028	0.000571235	0.074	8.96804e-20	0.065	1.27866e-15	0.125	2.69757e-54	0.022	0.0077172	0.164	1.02512e-91	0.08	5.59866e-23	0.031	0.000118628	0.022
Conduct disorders	-0.011	0.168104	0.002	0.81698	0.003	0.734666	-0.008	0.338094	-0.009	0.283702	0.006	0.478937	-0.006	0.432074	0.148	5.23202e-75	0.054	3.88869e-11	0.059	5.28807e-13	0.35	0	0.264	5.0616e-240	0.09	1.9579e-28	1	-	-0.012	0.137011	-0.009	0.282798	0.193	3.88891e-127	-0.013	0.0989548	0.017	0.0335983	0.059	5.09306e-13	0.183	1.05102e-114	-0.004	0.62171	0.014	0.0956375	0.133	4.18922e-61	-0.012
Dementias	0.019	0.0225372	0.012	0.149057	0.012	0.127968	-0.004	0.653784	0.01	0.211677	0.09	8.27435e-29	0.154	1.02e-80	0.011	0.193139	0.031	0.000121288	0.036	1.08958e-05	-0.016	0.0443184	-0.015	0.0681221	0.025	0.00237041	-0.012	0.137011	1	-	0.039	1.92819e-06	0.004	0.645253	0.009	0.267832	0.002	0.830179	0.023	0.00477042	-0.003	0.686754	0.041	3.65698e-07	-0.009	0.250641	-0.001	0.945975	0.292
Depression	0.112	2.92275e-43	0.275	1.36699e-260	0.165	1.00543e-92	0.138	9.65547e-66	0.138	6.73166e-66	0.075	2.07779e-20	0.103	2.19169e-37	0.077	1.53176e-21	0.317	0	0.111	1.05688e-42	0.008	0.314202	-0.068	7.00188e-17	0.154	3.94772e-81	-0.009	0.282798	0.039	1.92819e-06	1	-	-0.034	3.17175e-05	0.282	3.65593e-276	0.104	1.3238e-37	0.209	2.07018e-149	-0.028	0.000445415	0.551	0	0.076	1.04297e-20	-0.023	0.00391889	0.055
Developmental delays and disorders	-0.015	0.0578807	-0.021	0.0108782	0.011	0.190336	0.004	0.60089	0	0.97861	0.028	0.000687389	0.049	1.67299e-09	0.085	5.58669e-26	0.051	3.83538e-10	0.048	3.51382e-09	0.303	2.21588442159799e-319	0.44	0	0.028	0.000571235	0.193	3.88891e-127	0.004	0.645253	-0.034	3.17175e-05	1	-	-0.002	0.783923	0.042	1.74628e-07	0.067	1.26124e-16	0.321	0	-0.03	0.00025087	-0.007	0.390518	0.297	3.3718e-306	-0.009
Dysthymic disorder	0.076	7.5405e-21	0.178	4.32021e-108	0.109	1.82675e-41	0.085	8.90206e-26	0.086	3.94517e-26	0.037	6.36517e-06	0.043	1.12376e-07	0.084	2.09865e-25	0.183	1.82451e-114	0.09	7.54517e-29	0	0.987119	-0.025	0.00230554	0.074	8.96804e-20	-0.013	0.0989548	0.009	0.267832	0.282	3.65593e-276	-0.002	0.783923	1	-	0.088	1.48678e-27	0.139	1.35123e-66	-0.01	0.205617	0.269	4.14455e-249	0.01	0.221759	-0.009	0.250474	0.015
Eating disorder	0.02	0.0124396	0.075	1.25073e-20	0.034	3.11704e-05	0.024	0.00299763	0.042	2.07464e-07	0.015	0.0644511	0.02	0.0122965	0.116	1.15263e-46	0.076	5.86045e-21	0.074	4.96419e-20	0.035	2.10233e-05	0.029	0.000338055	0.065	1.27866e-15	0.017	0.0335983	0.002	0.830179	0.104	1.3238e-37	0.042	1.74628e-07	0.088	1.48678e-27	1	-	0.101	9.68994e-36	0.021	0.0106083	0.114	1.86516e-45	0.03	0.000242755	0.028	0.000451368	-0.004
Generalized anxiety disorder	0.069	1.5686e-17	0.184	6.16674e-116	0.239	2.41137e-195	0.07	7.37052e-18	0.089	7.90329e-28	0.026	0.00163336	0.036	9.53355e-06	0.092	7.78483e-30	0.371	0	0.076	5.55789e-21	0.114	4.35869e-45	0.054	2.04032e-11	0.125	2.69757e-54	0.059	5.09306e-13	0.023	0.00477042	0.209	2.07018e-149	0.067	1.26124e-16	0.139	1.35123e-66	0.101	9.68994e-36	1	-	0.051	3.40555e-10	0.286	2.51655e-283	0.056	5.91743e-12	0.025	0.00167831	0.023
Learning disorder	-0.008	0.346773	-0.015	0.0700763	0.003	0.714155	-0.011	0.170441	-0.007	0.355571	0.006	0.446245	0	0.982313	0.023	0.00426954	0.045	3.74347e-08	0.016	0.0493597	0.305	1.97626258336499e-323	0.189	1.16965e-121	0.022	0.0077172	0.183	1.05102e-114	-0.003	0.686754	-0.028	0.000445415	0.321	0	-0.01	0.205617	0.021	0.0106083	0.051	3.40555e-10	1	-	-0.017	0.0315949	-0.004	0.596701	0.164	1.82674e-92	-0.003
Major depressive disorder	0.1	6.01369e-35	0.282	1.55096e-274	0.195	1.6698e-129	0.16	1.48965e-87	0.15	3.02111e-77	0.062	3.10172e-14	0.099	1.35193e-34	0.092	7.7056e-30	0.323	0	0.109	1.2423e-41	0.022	0.00706792	-0.059	4.0099e-13	0.164	1.02512e-91	-0.004	0.62171	0.041	3.65698e-07	0.551	0	-0.03	0.00025087	0.269	4.14455e-249	0.114	1.86516e-45	0.286	2.51655e-283	-0.017	0.0315949	1	-	0.129	3.04712e-57	-0.02	0.0141946	0.058
Mental disorders during/after pregnancy	0.005	0.551626	0.074	5.07941e-20	0.031	0.000116996	0.018	0.0234222	0.008	0.33389	0.008	0.31257	-0.015	0.0562546	0.043	1.20616e-07	0.117	3.72708e-47	0.04	1.10062e-06	0.009	0.268623	-0.02	0.0152104	0.08	5.59866e-23	0.014	0.0956375	-0.009	0.250641	0.076	1.04297e-20	-0.007	0.390518	0.01	0.221759	0.03	0.000242755	0.056	5.91743e-12	-0.004	0.596701	0.129	3.04712e-57	1	-	-0.002	0.849075	-0.009
Mental retardation	0.001	0.85885	-0.011	0.170878	-0.01	0.230771	-0.008	0.326018	-0.009	0.292361	-0.01	0.231886	-0.004	0.588246	0.123	1.74683e-52	0.037	4.41105e-06	0.061	6.86783e-14	0.14	5.59975e-67	0.264	4.18279e-240	0.031	0.000118628	0.133	4.18922e-61	-0.001	0.945975	-0.023	0.00391889	0.297	3.3718e-306	-0.009	0.250474	0.028	0.000451368	0.025	0.00167831	0.164	1.82674e-92	-0.02	0.0141946	-0.002	0.849075	1	-	0
Mild cognitive impairment	0.014	0.089175	0.019	0.017341	0.023	0.00411939	0.002	0.77183	0.016	0.0420608	0.039	1.78326e-06	0.092	4.261e-30	0.002	0.7915	0.033	3.9759e-05	0.038	3.58986e-06	-0.007	0.408174	-0.014	0.0839954	0.022	0.00665161	-0.012	0.151289	0.292	9.9169e-297	0.055	1.50813e-11	-0.009	0.244742	0.015	0.0728124	-0.004	0.629717	0.023	0.00542186	-0.003	0.740894	0.058	1.01869e-12	-0.009	0.267601	0	0.99724	1
Mood disorders	0.028	0.000487868	0.107	7.00488e-40	0.086	2.33079e-26	0.113	3.85563e-44	0.113	3.19659e-44	0.058	9.07464e-13	0.105	3.85577e-38	0.161	1.2438e-88	0.154	1.88187e-81	0.104	6.79147e-38	0.109	1.98378e-41	0.039	1.98915e-06	0.277	1.48801e-265	0.124	4.50225e-53	0.027	0.000788627	0.178	4.79119e-108	0.064	3.48288e-15	0.109	2.44209e-41	0.071	1.38259e-18	0.127	1.51839e-55	0.027	0.00103838	0.205	1.95826e-143	0.031	0.000122448	0.034	3.48906e-05	0.025
Obsessive-compulsive disorders	0.017	0.0325558	0.032	8.31264e-05	0.111	8.26245e-43	0.014	0.0871241	0.012	0.123974	0.011	0.172317	-0.005	0.528696	0.076	7.29949e-21	0.115	8.37463e-46	0.028	0.000650351	0.098	5.93269e-34	0.122	3.5614e-51	0.066	5.55461e-16	0.086	1.52586e-26	-0.004	0.643993	0.058	6.68862e-13	0.074	1.0973e-19	0.035	1.7113e-05	0.057	2.26393e-12	0.133	1.7069e-60	0.046	1.66636e-08	0.082	5.75734e-24	0.026	0.00135595	0.078	5.73046e-22	-0.003
Other mental disorder	0.017	0.0378817	0.072	7.56999e-19	0.041	3.78562e-07	0.041	3.38789e-07	0.03	0.00023086	0.023	0.00428755	0.001	0.946358	0.076	1.00608e-20	0.077	2.30139e-21	0.037	6.83357e-06	0.181	4.38764e-112	0.157	6.58953e-85	0.044	6.49133e-08	0.127	1.13413e-55	-0.003	0.723656	0.054	4.00903e-11	0.133	3.94903e-61	0.056	6.87763e-12	0.071	2.33677e-18	0.072	3.76208e-19	0.096	2.28536e-32	0.072	9.5503e-19	0.016	0.046621	0.05	7.50593e-10	0.009
Personality disorders	0.054	2.86759e-11	0.12	3.73367e-50	0.114	4.05033e-45	0.133	1.09329e-60	0.144	6.81399e-71	0.056	6.61812e-12	0.052	1.34775e-10	0.236	2.59139e-191	0.122	2.67524e-51	0.177	9.3883e-107	0.021	0.0092311	0.011	0.173899	0.197	8.04944e-133	0.019	0.0188054	0.017	0.0401863	0.152	2.21985e-79	0.031	0.000116128	0.174	5.08381e-104	0.091	1.65161e-29	0.108	1.07397e-40	0.013	0.122277	0.166	3.80879e-94	0.03	0.000193521	0.001	0.929129	0.009
Posttraumatic stress disorder	0.075	1.66419e-20	0.118	5.6069e-48	0.132	9.97763e-60	0.118	5.52773e-48	0.117	3.152e-47	0.057	1.40177e-12	0.065	7.08498e-16	0.228	6.27448e-179	0.138	2.7075e-65	0.078	4.80989e-22	0.051	3.55322e-10	-0.019	0.0191634	0.192	1.96141e-125	0.031	0.000167494	0.011	0.157692	0.148	1.02598e-74	0.012	0.14407	0.101	6.61425e-36	0.08	3.64059e-23	0.136	2.99465e-63	0.002	0.808446	0.191	2.0278e-124	0.015	0.0676447	0.013	0.117646	0.013
Psychosis	0.027	0.000983911	0.052	1.11612e-10	0.032	9.29988e-05	0.043	1.12835e-07	0.029	0.000296301	0.081	2.5099e-23	0.129	1.78329e-57	0.092	8.90894e-30	0.049	1.06239e-09	0.065	1.55188e-15	0.026	0.00128873	0.003	0.735322	0.111	7.77902e-43	0.037	3.96721e-06	0.057	1.3864e-12	0.093	2.42711e-30	0.038	2.61813e-06	0.074	1.1323e-19	0.044	5.59746e-08	0.048	4.24028e-09	0.008	0.32318	0.089	4.07449e-28	0.01	0.231124	0.012	0.133972	0.022
Somatoform disorder	0.049	1.69306e-09	0.104	1.87696e-37	0.054	2.85417e-11	0.047	8.15041e-09	0.035	1.80021e-05	0.091	2.56146e-29	0.056	4.57669e-12	0.011	0.1851	0.11	3.99842e-42	0.044	7.66783e-08	-0.008	0.325905	-0.007	0.379931	0.074	4.53138e-20	0.005	0.542621	0.037	3.81243e-06	0.114	7.46611e-45	-0.001	0.934761	0.075	1.75448e-20	0.027	0.000831297	0.078	9.95415e-22	-0.003	0.698367	0.126	1.48787e-54	0.013	0.123467	0.008	0.3523	0.039
Speech and language disorder	-0.012	0.127925	-0.02	0.0142881	-0.006	0.455283	-0.02	0.0144588	-0.017	0.0347451	0.004	0.635191	0.005	0.570047	0.101	6.35339e-36	0.052	1.64602e-10	0.033	4.08122e-05	0.239	6.35565e-197	0.391	0	0.018	0.0297455	0.254	1.36982e-221	-0.007	0.355498	-0.042	1.78531e-07	0.446	0	-0.013	0.114254	0.049	1.26608e-09	0.049	1.08087e-09	0.241	2.60594e-200	-0.033	4.11235e-05	-0.014	0.0938661	0.218	1.75116e-162	-0.001
Substance addiction and disorders	0.025	0.00214997	0.093	3.283e-30	0.117	9.90671e-48	0.29	9.55918e-292	0.253	1.38254e-220	0.077	2.42244e-21	0.135	2.32419e-62	0.12	1.32011e-49	0.16	1.81898e-87	0.098	1.10474e-33	0.03	0.000171044	-0.032	6.60963e-05	0.16	2.78997e-87	0.011	0.1591	0.005	0.561377	0.182	1.00637e-113	0.006	0.487679	0.089	2.90132e-28	0.045	2.31045e-08	0.112	1.83077e-43	-0.019	0.0221388	0.188	1.14495e-120	0.082	7.48232e-24	-0.016	0.0527056	0.01
Suicidal ideation	0.033	4.24256e-05	0.08	6.50485e-23	0.101	1.30073e-35	0.15	7.11596e-77	0.18	6.158e-111	0.075	2.43824e-20	0.065	1.30598e-15	0.23	5.19661e-181	0.101	1.34142e-35	0.148	2.2113e-75	0.061	3.64698e-14	0.01	0.223963	0.154	3.80805e-81	0.047	4.87267e-09	0.008	0.338668	0.138	8.41369e-66	0.035	1.96274e-05	0.113	5.89653e-44	0.062	1.71288e-14	0.095	6.41509e-32	0.019	0.0203772	0.162	1.15072e-89	-0.001	0.875405	0.017	0.0366216	-0.008
Tics and stuttering	-0.011	0.193855	-0.007	0.393268	0.01	0.199342	-0.007	0.364587	-0.013	0.10642	0.012	0.136256	-0.009	0.289505	0.032	9.84195e-05	0.053	4.60786e-11	0.016	0.0556959	0.198	2.1147e-133	0.218	6.66393e-163	0	0.996548	0.145	1.09114e-71	-0.008	0.313405	-0.019	0.016672	0.209	3.27655e-149	0	0.975588	0.01	0.21588	0.055	9.53798e-12	0.127	5.27236e-56	-0.018	0.0265521	-0.001	0.902737	0.111	1.22575e-42	0.001
Tobacco use disorder	0.029	0.000410863	0.095	1.13283e-31	0.07	9.05415e-18	0.136	2.6626e-63	0.141	1.45173e-68	0.055	1.20092e-11	0.116	2.48273e-46	0.029	0.000301685	0.142	4.92867e-69	0.017	0.036072	-0.073	1.73438e-19	-0.092	7.10115e-30	0.09	1.37835e-28	-0.036	1.187e-05	0.007	0.390428	0.165	1.99778e-93	-0.057	2.41497e-12	0.05	4.81718e-10	0.025	0.00201412	0.069	2.25775e-17	-0.047	5.34696e-09	0.167	3.31034e-95	0.075	1.30854e-20	-0.035	1.41834e-05	0.014
[truncated: 25 more columns]

## Sheet: S5. nonpsych-psych pheno corr
phenotype	category	Acute reaction to stress	Adjustment reaction	Agorophobia, social phobia, and panic disorder	Alcohol-related disorders	Alcoholism	Alteration of consciousness	Altered mental status	Antisocial/borderline personality disorder	Anxiety disorder	Anxiety disorders	Attention deficit hyperactivity disorder	Autism	Bipolar	Conduct disorders	Dementias	Depression	Developmental delays and disorders	Dysthymic disorder	Eating disorder	Generalized anxiety disorder	Learning disorder	Major depressive disorder	Mental disorders during/after pregnancy	Mental retardation	Mild cognitive impairment	Mood disorders	Obsessive-compulsive disorders	Other mental disorder	Personality disorders	Posttraumatic stress disorder	Psychosis	Somatoform disorder	Speech and language disorder	Substance addiction and disorders	Suicidal ideation	Tics and stuttering	Tobacco use disorder
Intestinal infection	infectious diseases	0.016	0.031	0.028	0	0.007	0.021	0.013	0.021	0.05	0.002	0.081	0.084	0.011	0.07	-0.004	0.021	0.094	0.017	0.024	0.033	0.061	0.036	0.013	0.049	0.003	0.023	0.004	0.103	0.011	0.039	-0.001	0.041	0.064	0.015	-0.003	0.052	0.009
Intestinal infection due to C. difficile	infectious diseases	0.011	0.036	0.019	0.008	0.026	0.075	0.112	0.006	0.04	0.013	-0.015	-0.019	0.021	-0.005	-0.004	0.064	0.005	0.047	0.028	0.009	-0.001	0.046	0.006	0.003	0.015	0.029	0.014	-0.005	0.017	0.014	0.029	0.027	-0.002	0.042	0.01	-0.003	0.066
Viral Enteritis	infectious diseases	0.006	0.016	0	0.002	0.007	0.034	0.047	0.028	0.028	0.021	0.036	0.056	0.044	0.047	0.012	0.04	0.041	0.029	0.023	0.016	0.009	0.031	0.002	0.053	0.003	0.057	-0.008	0.032	0.045	0.012	0.064	0.051	0.023	0.024	0.024	0.014	0.025
Septicemia	infectious diseases	-0.003	0.031	0.012	0.055	0.035	0.128	0.182	0.015	0.039	0.009	-0.028	-0.023	0.02	-0.013	0.037	0.074	-0.001	0.04	0.003	0.021	-0.009	0.052	-0.008	-0.006	-0.006	0.045	0.032	-0.005	0.03	0.033	0.036	0.015	-0.014	0.076	0.017	-0.006	0.11
Gram negative septicemia	infectious diseases	-0.009	0.011	-0.006	0.027	0.026	0.06	0.078	0.006	0.023	0.002	0	-0.01	0.005	-0.009	-0.007	0.056	-0.011	0.045	0.008	0.006	-0.008	0.027	-0.007	-0.007	0.003	0.028	0	0.008	0.004	0.006	-0.006	0.003	-0.01	0.062	0.004	-0.006	0.036
Bacteremia	infectious diseases	-0.005	0.038	0.009	0.041	0.031	0.101	0.174	0.019	0.04	0.012	-0.024	-0.024	0.015	-0.011	0.037	0.049	-0.004	0.04	0.006	0.014	-0.007	0.033	-0.012	-0.011	0.02	0.041	-0.003	-0.007	0.022	0.03	0.02	0.013	-0.016	0.075	0.015	-0.004	0.08
Bacterial infection NOS	infectious diseases	0.011	0.064	0.033	0.02	0.018	0.123	0.197	0.019	0.063	0.007	0.003	-0.012	0.037	0.001	0.054	0.067	0.009	0.045	0.005	0.029	0.008	0.063	0.015	-0.007	0.03	0.048	0.002	-0.003	0.038	0.029	0.045	0.054	-0.005	0.066	0.009	0.01	0.089
Methicillin sensitive Staphylococcus aureus	infectious diseases	0.03	0.043	0.033	0.039	0.02	0.051	0.087	0.014	0.044	0.001	-0.008	-0.012	0.037	0.009	-0.008	0.055	0.008	0.053	0.012	0.02	0.007	0.05	0	0.002	0.001	0.04	0.035	0.003	0.03	0.035	0.025	0.027	-0.005	0.062	0.038	0.002	0.038
Methicillin resistant Staphylococcus aureus	infectious diseases	0.023	0.055	0.02	0.044	0.028	0.073	0.134	0.019	0.046	0.02	-0.004	-0.008	0.023	0.004	0.021	0.086	0.016	0.052	0.025	0.024	0.003	0.077	0.005	-0.001	0.014	0.018	0.009	0.004	0.048	0.027	0.038	0.043	0.002	0.081	0.031	0.008	0.063
Streptococcus infection	infectious diseases	0.008	0.027	0	0.038	0.023	0.101	0.095	0	0.03	-0.003	0.022	0.013	0.022	0.022	0.017	0.038	0.041	0.007	0.016	0.005	0.001	0.037	0.047	0.026	0.025	0.049	0.006	0.027	0.006	0.007	0.041	0.045	0.023	0.06	-0.002	0.013	0.048
E. coli	infectious diseases	0.024	0.031	0.026	0.011	0.015	0.082	0.11	0.028	0.027	0.02	-0.022	-0.018	0.033	-0.006	0.037	0.053	0.017	0.039	0.008	0.017	-0.01	0.043	-0.009	-0.001	0.015	0.039	0.003	0.001	0.016	0.023	0.048	0.052	-0.007	0.03	0.024	0	0.045
Herpes zoster	infectious diseases	0.03	0.05	0.03	0.031	0.002	0.021	0.029	-0.001	0.05	-0.005	-0.033	-0.03	0.003	-0.012	0	0.052	-0.012	0.026	-0.002	0.034	-0.016	0.044	-0.001	-0.014	0.021	0	-0.004	-0.003	0.002	-0.001	0.023	0.02	-0.021	0.008	-0.003	-0.008	0.052
Herpes simplex	infectious diseases	0.06	0.094	0.029	0.039	0.029	0.023	0.01	0.007	0.094	0.013	0.008	-0.021	0.042	0.007	0.006	0.089	-0.008	0.04	0.009	0.074	0.001	0.085	0.028	0.003	0.007	0.046	0.018	0.027	0.032	0.037	0.013	0.01	-0.008	0.036	-0.001	0.004	0.042
Viral hepatitis C	infectious diseases	-0.009	0.007	0.047	0.1	0.108	0.016	0.056	0.036	0.049	0.026	-0.008	-0.022	0.059	-0.014	-0.004	0.059	-0.006	0.02	0.008	0.015	-0.012	0.048	0.019	-0.01	-0.004	0.05	0.004	0.008	0.018	0.034	0.015	0.009	-0.015	0.229	0.057	-0.01	0.097
Hepatitis NOS	infectious diseases	0.005	0.021	0.039	0.055	0.052	0.02	0.049	0.017	0.029	0.011	-0.014	-0.009	0.004	-0.013	-0.009	0.043	0.015	0.024	0.041	0.023	-0.004	0.031	-0.003	0.013	0.02	0.019	0.001	0.022	0.037	0.036	0.01	0.012	-0.004	0.045	0.014	-0.001	0.031
Viral warts & HPV	infectious diseases	0.043	0.071	0.02	0.011	0.007	0.003	0.01	0.006	0.055	-0.001	0.016	-0.011	0.024	0.02	-0.005	0.074	0.005	0.058	0.023	0.028	-0.011	0.081	0.027	-0.012	-0.001	0.019	0.024	0.072	0.02	-0.005	0	0.038	-0.015	0.036	-0.018	-0.005	0.042
Viral infection	infectious diseases	0.047	0.096	0.053	0.027	0.019	0.025	0.025	0.038	0.101	0.021	0.142	0.114	0.053	0.105	-0.017	0.084	0.126	0.052	0.027	0.077	0.079	0.08	0.075	0.041	-0.01	0.064	0.021	0.176	0.032	0.035	0.014	0.026	0.101	0.025	0.027	0.071	0.046
Viremia, NOS	infectious diseases	-0.003	0.012	0.009	0.006	0.016	0.022	0.02	0.015	0.023	0.001	0.093	0.085	0.013	0.062	-0.007	0.008	0.074	0.016	0.02	0.015	0.055	0.006	0.001	0.021	-0.007	0.023	-0.009	0.082	0.012	0.03	0.005	0.002	0.063	-0.004	0.021	0.022	-0.001
Postoperative infection	infectious diseases	0.039	0.07	0.023	0.045	0.046	0.056	0.087	0.04	0.053	0.043	-0.023	-0.029	0.033	-0.004	0.016	0.079	-0.005	0.055	0.063	0.018	-0.011	0.077	0.004	0.002	0.007	0.03	0.001	-0.001	0.056	0.044	0.042	0.045	-0.01	0.058	0.038	-0.013	0.077
Infection/inflammation of internal prosthetic device; implant; and graft	infectious diseases	0.012	0.022	0.022	0.01	0.029	0.079	0.098	0.03	0.044	0.028	-0.018	-0.021	0.028	-0.014	0.009	0.06	-0.001	0.044	0.036	0.007	-0.006	0.048	-0.005	0.004	0.01	0.039	0.005	0.004	0.012	0.011	0.047	0.016	-0.015	0.046	0.032	0.005	0.066
Burns	NULL	0.031	0.064	0.041	0.048	0.049	0.049	0.028	0.06	0.042	0.023	-0.014	-0.015	0.052	-0.015	0.012	0.072	-0.001	0.048	0.025	0.04	-0.008	0.065	0.01	0.02	0.013	0.031	0.007	0.027	0.034	0.052	0.055	0.025	-0.004	0.063	0.008	-0.011	0.06
Foreign body injury	NULL	0.017	0.018	0.012	0.033	0.049	0.027	0.04	0.034	0.04	0.024	0.03	0.026	0.016	0.028	0.016	0.044	0.042	0.033	0.015	0.021	0.002	0.031	-0.005	0.048	0.012	0.035	0.001	0.038	0.014	0.034	0.03	0.036	0.034	0.031	0.028	0.008	0.067
Symptoms concerning nutrition, metabolism, and development	NULL	0.021	0.062	0.037	0.04	0.038	0.061	0.07	0.096	0.105	0.037	0.139	0.173	0.042	0.108	0.046	0.083	0.184	0.06	0.092	0.068	0.055	0.075	0.005	0.089	0.027	0.076	0.022	0.116	0.063	0.062	0.061	0.044	0.153	0.062	0.041	0.071	0.067
Other signs and symptoms involving emotional state	NULL	0.014	0.025	0.024	0.035	0.027	0.027	0.037	0.238	0.034	0.08	0.076	0.112	0.034	0.151	0.003	0.036	0.121	0.016	0.024	0.032	0.019	0.044	0.012	0.076	0.014	0.101	0.018	0.04	0.026	0.036	0.018	0.023	0.1	0.042	0.014	0.036	0.021
Other symptoms	NULL	0.021	0.081	0.041	0.053	0.039	0.071	0.1	0.045	0.088	0.041	0.023	0.021	0.046	0.022	0.043	0.104	0.051	0.085	0.044	0.048	-0.001	0.112	0.009	0.024	0.031	0.055	0.007	0.064	0.042	0.063	0.051	0.089	0.056	0.053	0.04	0.015	0.048
Crushing or internal injury to organs	NULL	-0.003	0.038	0.003	0.028	0.043	0.067	0.056	0.024	0.021	0.026	-0.005	-0.012	0.037	-0.01	0.018	0.047	-0.008	0.019	-0.002	0.007	-0.001	0.042	0.025	-0.007	0.002	0.035	0.013	0.021	0.021	0.023	0.025	0.019	-0.011	0.057	0.039	0.002	0.049
Injury, NOS	NULL	0.077	0.122	0.044	0.072	0.079	0.079	0.099	0.033	0.12	0.043	0.05	-0.01	0.081	0.033	0.044	0.173	0.021	0.087	0.034	0.078	0.008	0.167	0.009	0.002	0.049	0.079	0.017	0.078	0.058	0.084	0.053	0.057	0.013	0.094	0.05	0.007	0.103
Other tests	NULL	0.076	0.168	0.072	0.067	0.062	0.042	0.045	0.023	0.175	0.005	-0.034	-0.073	0.05	-0.01	0.022	0.225	-0.018	0.109	0.043	0.103	-0.012	0.209	0.053	-0.008	0.038	0.057	0.01	0.207	0.037	0.046	0.027	0.04	-0.024	0.051	0.022	-0.008	0.206
Complications of surgical and medical procedures	NULL	0.033	0.047	0.012	0.029	0.027	0.053	0.095	0.003	0.056	0.02	-0.024	-0.027	0.029	-0.017	-0.002	0.068	-0.009	0.048	0.033	0.024	-0.005	0.074	-0.003	0	-0.005	0.025	0.006	0.012	0.035	0.034	0.037	0.071	-0.009	0.044	0.019	-0.004	0.093
Asphyxia and hypoxemia	NULL	0.01	0.052	0.003	0.037	0.03	0.097	0.207	0	0.065	-0.005	-0.036	-0.029	0.023	-0.014	0.028	0.071	-0.003	0.051	0.009	0.018	-0.015	0.072	-0.018	-0.008	0.034	0.021	-0.006	-0.013	0.015	0.015	0.036	0.033	-0.01	0.069	0.023	-0.011	0.14
Effects of other external causes	NULL	0.056	0.099	0.076	0.073	0.079	0.104	0.177	0.045	0.122	0.045	-0.01	-0.023	0.076	-0.007	0.08	0.161	0.013	0.071	0.048	0.088	0.003	0.173	0.025	0.005	0.07	0.056	0.018	0.035	0.062	0.086	0.101	0.09	-0.001	0.109	0.059	0.003	0.13
Other ill-defined and unknown causes of morbidity and mortality	NULL	0.079	0.069	0.054	0.059	0.047	0.034	0.082	0.035	0.056	0.012	0.001	-0.001	0.027	0.022	0.021	0.071	0.02	0.056	-0.003	0.043	0.007	0.113	-0.013	0.027	0.026	0.037	0.024	0.012	0.021	0.054	0.041	0.036	0.007	0.042	0.024	0.002	0.057
Dermatophytosis	infectious diseases	0.016	0.025	0.002	-0.001	-0.002	-0.002	0.008	0.003	0.007	0.009	0.027	0.004	0.001	0.014	-0.008	0.004	0.013	0.014	0.025	0.019	0.029	0.016	0	0.01	0.001	-0.002	0.013	0.027	0.011	0.002	0.004	0.009	0.006	0	0.002	0.002	0.012
Dermatophytosis of nail	infectious diseases	0.027	0.06	0.003	0.037	0.014	0.023	0.043	0	0.024	0.014	-0.045	-0.044	0.01	-0.026	0.022	0.083	-0.022	0.028	0.014	0.018	-0.02	0.077	-0.021	-0.018	0.043	0.013	0.001	0.013	0.027	-0.004	0.008	0.035	-0.026	0.012	-0.001	-0.017	0.076
Althete's foot	infectious diseases	0.027	0.027	0.025	0.052	0.026	0.024	0.003	0.003	0.02	-0.007	-0.007	-0.018	-0.002	-0.009	0.004	0.032	-0.007	0.027	0.012	0.006	-0.009	0.025	-0.008	0	-0.001	0.008	0.005	0.009	0.007	-0.008	0.023	0.016	-0.014	0.032	0.012	-0.011	0.036
Dermatophytosis of the body	infectious diseases	0.018	0.028	0.021	0.02	0.018	0.014	0.006	0.021	0.038	0.024	0.036	0.022	0.004	0.047	0.015	0.047	0.016	0.015	0.016	0.035	0.039	0.043	0.013	-0.001	0.01	-0.001	0.009	0.06	0.024	0.004	0.016	0.021	0.024	0.01	0.017	0	0.017
Family history	NULL	0.027	0.031	0.019	-0.005	-0.009	0.005	0.006	-0.004	0.025	-0.007	0.016	0.015	0.007	0.008	-0.012	0.024	0.003	0.022	0.012	0.024	0.01	0.033	-0.003	-0.006	0.005	0.002	0.009	0.021	-0.005	-0.004	0.003	-0.001	0.005	0.008	-0.006	0.018	-0.001
Candidiasis	infectious diseases	0.069	0.13	0.045	0.02	0.019	0.046	0.052	0.024	0.131	0.038	0.004	-0.01	0.044	0.009	0.002	0.132	0.002	0.069	0.041	0.094	-0.004	0.119	0.07	0	-0.001	0.048	0.017	0.03	0.065	0.045	0.014	0.048	0.001	0.062	0.004	0.005	0.068
Candidiasis of skin and nails	infectious diseases	0.02	0.049	0.038	0.008	0.007	0.039	0.059	0.031	0.055	0.046	0	0.01	0.018	0.024	0.016	0.055	0.015	0.031	0.029	0.042	0.012	0.062	0.014	0.017	0	0.039	0.011	0.012	0.062	0.031	0.032	0.04	0.038	0.029	0.051	0.01	0.033
Lyme disease	infectious diseases	-0.01	0.006	0.008	0	0.022	-0.009	0.004	0.004	0.025	0.001	0.036	0.032	-0.003	0.009	0.01	0.018	0.041	0.002	0.005	0.021	0.015	0.007	-0.008	0.002	0.011	0.018	-0.001	0.043	0.012	-0.003	-0.006	0.002	0.032	0.015	0.012	0.022	-0.006
Other infectious and parasitic diseases	infectious diseases	0.015	0.053	0.033	0.031	0.052	0.041	0.083	0.02	0.069	0.019	0.02	0.01	0.013	0.008	0.008	0.059	0.015	0.036	0.022	0.021	0.026	0.057	0.012	0.009	0.002	0.031	0.029	0.013	0.036	0.027	0.021	0.032	0.014	0.064	0.022	0.036	0.046
Colon cancer	neoplasms	0.055	0.025	0.005	0.03	0.016	0.015	0.039	-0.012	0.008	-0.01	-0.05	-0.041	-0.015	-0.021	0.034	0.014	-0.026	0.005	-0.012	0.009	-0.019	0.041	-0.02	-0.019	0.014	-0.017	-0.001	-0.046	-0.014	-0.01	0.001	0.006	-0.023	-0.012	-0.011	-0.018	0.072
Malignant neoplasm of rectum, rectosigmoid junction, and anus	neoplasms	0.037	0.013	0.003	0.007	0.006	0.006	0.018	-0.01	0.002	-0.007	-0.021	-0.025	-0.005	-0.012	0.016	0.023	-0.02	0.004	-0.015	0.014	-0.014	0.035	-0.013	-0.011	0	-0.002	-0.004	-0.026	-0.011	0.005	0.004	0.005	-0.013	0	-0.011	-0.011	0.063
Pancreatic cancer	neoplasms	-0.009	-0.008	-0.012	-0.004	-0.011	0.001	0.001	-0.006	-0.011	0.012	-0.021	-0.014	-0.006	-0.009	0.003	-0.009	-0.011	-0.004	-0.008	-0.012	-0.008	-0.016	-0.007	-0.007	0.003	-0.008	0	-0.012	-0.006	-0.002	-0.006	0.003	-0.01	-0.002	-0.006	-0.006	-0.011
Neoplasm of unspecified nature of digestive system	neoplasms	0.019	0.011	0.004	-0.008	-0.009	0.037	0.014	-0.007	0.003	-0.009	-0.021	-0.014	-0.001	-0.012	0.038	0.011	-0.01	0.01	-0.01	-0.013	-0.01	0.016	-0.009	-0.008	0.04	0.012	-0.003	-0.01	0.001	0.024	0.002	0.023	-0.007	0.001	-0.008	-0.008	0.026
Malignant neoplasm of other and ill-defined sites within the digestive organs and peritoneum	neoplasms	0.022	-0.001	0	0.002	0.002	0.009	0.019	0.006	0.011	0.003	-0.014	-0.014	0.005	-0.009	0.023	0.004	0.001	0.016	0	-0.005	-0.008	0.008	-0.007	-0.006	0.004	0.013	0.001	0.005	-0.006	0.013	-0.006	0.013	-0.01	0.014	-0.006	-0.006	0.013
Cancer of bronchus; lung	neoplasms	-0.006	-0.005	-0.01	0	0.01	0.016	0.036	-0.01	0.008	-0.001	-0.034	-0.025	-0.007	-0.016	-0.006	0.004	-0.02	-0.007	-0.014	-0.023	-0.013	0.019	-0.012	-0.011	0.012	-0.017	-0.014	-0.004	-0.005	0.002	0.025	-0.006	-0.017	0.003	-0.011	-0.011	0.105
Cancer of connective tissue	neoplasms	0.01	0.002	-0.008	-0.006	0.004	0.029	0.003	0.004	0.012	0.026	-0.017	-0.012	-0.008	-0.011	-0.008	-0.005	-0.008	0.002	-0.002	-0.009	-0.009	-0.006	-0.008	-0.007	-0.007	-0.006	-0.009	-0.005	0.012	0.003	-0.006	0.001	-0.011	0	0.002	-0.007	0.005
Melanomas of skin, dx or hx	neoplasms	0.015	0.019	0	0.011	0.009	0.02	0.014	-0.01	0.01	-0.012	-0.027	-0.025	-0.005	-0.012	0.022	0.017	-0.013	-0.005	-0.005	-0.018	-0.014	0.017	-0.013	-0.006	0.017	0.018	-0.004	0.011	0.001	0.001	-0.003	0.005	-0.013	-0.01	-0.005	-0.005	0.006
Melanomas of skin	neoplasms	0.013	0.017	-0.002	-0.005	-0.006	0.019	0.016	-0.011	0	-0.002	-0.03	-0.026	-0.009	-0.017	0.015	0	-0.017	-0.009	-0.015	-0.021	-0.014	0.006	-0.013	-0.012	0.01	0.019	-0.015	0.004	0	-0.004	0.003	0.01	-0.014	-0.008	-0.012	-0.006	-0.01
Other non-epithelial cancer of skin	neoplasms	0.029	0.036	0.001	0.011	0.005	0.007	0.032	-0.017	0.016	-0.021	-0.065	-0.058	-0.02	-0.036	0.04	0.051	-0.04	0.008	-0.01	-0.019	-0.031	0.033	-0.029	-0.024	0.043	-0.002	-0.017	0.01	0.005	-0.015	0.018	0.001	-0.035	-0.007	-0.012	-0.017	0.069
Basal cell carcinoma	neoplasms	0.015	0.028	-0.003	-0.008	-0.007	-0.001	0.014	-0.011	-0.003	-0.011	-0.047	-0.038	-0.014	-0.025	0.013	0.017	-0.028	-0.006	-0.006	-0.015	-0.02	0.02	-0.019	-0.017	0.014	0.001	-0.018	0.024	-0.004	-0.015	0.008	0.005	-0.023	-0.014	-0.009	-0.013	0.054
Squamous cell carcinoma	neoplasms	0.009	0.019	0.008	0.019	0.01	0.018	0.022	-0.011	0.011	-0.008	-0.033	-0.026	-0.009	-0.017	0.014	0.007	-0.021	0.012	-0.015	-0.006	-0.014	0.018	-0.013	-0.012	0.01	0.001	-0.01	0.006	0	0	-0.004	0.004	-0.014	0.003	-0.012	-0.006	0.047
Carcinoma in situ of skin	neoplasms	0.014	0.033	-0.004	0.003	-0.006	0.003	0.019	-0.009	0.017	-0.011	-0.019	-0.023	0.002	-0.01	0.038	0.018	-0.018	0.023	-0.013	-0.002	-0.012	0.017	-0.012	-0.011	0.014	0.017	0.003	0.002	-0.004	-0.001	-0.002	-0.005	-0.012	0	-0.01	0.003	0.044
Neoplasm of uncertain behavior of skin	neoplasms	0.03	0.034	0.006	0.009	-0.002	0.004	0.022	-0.019	0.043	-0.009	-0.058	-0.045	-0.012	-0.033	0.035	0.063	-0.03	0.026	-0.008	-0.007	-0.025	0.018	-0.005	-0.02	0.035	0.006	-0.001	-0.01	-0.004	-0.013	0.004	0.009	-0.024	-0.005	-0.014	-0.019	0.049
Breast cancer [female]	neoplasms	0.042	0.049	-0.008	-0.005	-0.01	-0.013	-0.004	-0.002	0.008	-0.011	-0.025	-0.023	-0.002	-0.015	-0.011	0.027	-0.019	0.02	-0.004	0.002	-0.013	0.025	-0.012	-0.011	0.008	0.01	-0.003	0.005	0.003	0.022	0.006	0.001	-0.016	-0.004	-0.004	-0.01	-0.008
Malignant neoplasm of female breast	neoplasms	0.048	0.046	-0.007	-0.006	-0.009	-0.001	0.015	0.004	0.025	-0.01	-0.053	-0.046	-0.004	-0.03	-0.009	0.033	-0.035	0.015	-0.014	-0.014	-0.025	0.028	-0.02	-0.021	0.021	-0.003	-0.015	-0.008	-0.003	0.004	0.005	-0.003	-0.028	-0.013	-0.008	-0.02	0
Acquired absence of breast	neoplasms	0.05	0.081	0.034	0.015	0.021	0.019	0.084	0.021	0.086	0.008	-0.03	-0.034	0.021	-0.016	0.009	0.085	-0.021	0.033	0.029	0.054	-0.018	0.104	0.009	-0.01	0.027	0.041	0.007	0.014	0.024	0.047	0.015	0.039	-0.012	0.056	0.022	-0.016	0.1
Cervical intraepithelial neoplasia [CIN] [Cervical dysplasia]	neoplasms	0.015	0.042	0.015	0.007	0.022	0.004	-0.003	0.013	0.038	0.001	-0.029	-0.023	0.013	-0.01	-0.011	0.059	-0.011	0.024	0.017	0.029	-0.012	0.033	0.018	-0.004	-0.011	0.015	0.014	0.025	0.023	0.018	-0.009	0.014	-0.016	0.01	-0.004	-0.01	0.042
Malignant neoplasm of uterus	neoplasms	0.007	0.021	-0.005	-0.008	-0.009	-0.003	0	-0.007	0.019	-0.001	-0.023	-0.018	-0.001	-0.012	0.007	0.021	-0.014	0.002	0.009	0.005	-0.01	0.025	-0.002	-0.008	-0.008	0	-0.003	0.008	0.001	0.001	-0.007	0.007	-0.012	0.002	-0.008	0.001	-0.007
Malignant neoplasm of ovary	neoplasms	0.007	0.026	-0.011	-0.004	-0.004	0.001	0.001	-0.006	0.017	0.013	-0.02	-0.014	0.017	-0.009	0.003	0.02	-0.011	0.021	0.008	-0.004	-0.008	0.017	-0.007	-0.006	0.024	-0.008	-0.008	-0.017	-0.006	0.014	-0.005	0.014	-0.01	0.01	-0.006	-0.006	-0.002
Cancer of prostate	neoplasms	-0.005	-0.031	-0.011	0.015	0.016	-0.003	0.039	-0.015	-0.031	-0.018	-0.046	-0.037	-0.022	-0.024	0.029	-0.013	-0.025	-0.028	-0.018	-0.036	-0.017	-0.04	-0.019	-0.017	0.027	-0.014	-0.014	-0.003	-0.008	-0.021	-0.01	-0.01	-0.026	-0.003	-0.013	-0.016	0.041
Cancer of kidney and renal pelvis	neoplasms	-0.001	-0.002	0	0.008	0.001	0.009	0.03	0.006	-0.002	-0.007	-0.014	-0.014	-0.001	-0.009	0.003	-0.014	-0.006	-0.014	-0.008	-0.016	0.001	-0.006	-0.007	0.004	0.003	-0.003	0	0.002	-0.006	0.006	0.006	0.003	-0.01	0.019	-0.006	-0.006	0.026
Malignant neoplasm of kidney, except pelvis	neoplasms	-0.011	-0.011	-0.01	-0.003	-0.004	0.017	0.015	-0.007	-0.004	-0.001	-0.018	-0.018	-0.01	-0.006	-0.001	-0.018	-0.009	-0.017	-0.004	-0.018	0.004	-0.016	-0.009	0	0.008	-0.004	-0.003	0.008	-0.008	0.001	0.003	0	-0.012	0.002	-0.008	-0.008	0.015
Malignant neoplasm of bladder	neoplasms	0.008	0.003	0.003	-0.002	0.005	0	0.045	-0.008	0.007	-0.004	-0.03	-0.018	-0.014	-0.014	0.017	0.015	-0.013	0	-0.001	-0.009	-0.011	0.006	-0.011	-0.01	0.018	-0.009	-0.012	-0.005	-0.009	-0.003	-0.008	0.004	-0.014	0.018	-0.009	-0.009	0.074
Cancer of brain	neoplasms	-0.001	0.009	-0.005	-0.004	-0.004	0.018	0.044	-0.006	0.01	-0.007	0.011	-0.004	-0.006	-0.002	0.013	-0.012	0.007	-0.004	0	-0.012	0.01	-0.001	-0.007	-0.006	0.014	0.003	0.018	0.018	0.005	-0.001	-0.005	-0.007	0.004	0.015	0.004	-0.006	-0.005
Thyroid cancer	neoplasms	-0.004	-0.007	-0.003	-0.001	0.01	-0.007	-0.003	-0.002	0.007	-0.011	-0.024	-0.023	0.021	-0.01	0.002	0.006	-0.018	-0.01	0.012	-0.003	-0.012	0.006	-0.011	-0.01	0.015	0.015	-0.002	-0.013	-0.003	0	-0.009	0.002	-0.007	0.007	0.003	-0.01	0.01
Cancer, suspected or other	neoplasms	0.001	0.013	-0.007	0	0.003	0.026	0.052	-0.009	0.03	0.008	-0.019	-0.022	-0.011	-0.01	0.021	0.019	-0.01	-0.003	0.003	-0.007	-0.012	0.013	-0.005	-0.01	0.009	-0.014	-0.002	-0.013	-0.01	0.01	0.007	0.009	-0.011	0.033	-0.01	-0.01	0.024
Malignant neoplasm, other	neoplasms	0.028	0.02	0.009	-0.012	0	0.023	0.025	-0.012	0.036	0	-0.028	-0.026	-0.004	-0.015	0.006	0.022	-0.023	-0.001	-0.009	-0.004	-0.011	0.028	-0.014	-0.013	0.022	-0.008	-0.008	-0.005	-0.007	0	0.019	0.011	-0.016	0.004	-0.008	-0.013	0.049
Radiotherapy	neoplasms	0.014	0.036	0.012	0.017	0.022	0.01	0.037	-0.004	0.031	-0.007	-0.022	-0.026	0.004	-0.017	0.021	0.023	-0.017	0.008	-0.001	-0.002	-0.014	0.046	-0.013	-0.012	0.033	-0.009	-0.005	0.014	-0.011	-0.004	-0.003	0.005	-0.01	0.017	-0.006	-0.011	0.056
Chemotherapy	neoplasms	0.016	0.041	0.001	0.003	-0.001	0.041	0.07	-0.011	0.051	-0.004	-0.048	-0.043	-0.003	-0.025	0.007	0.046	-0.021	0.02	-0.014	0.006	-0.014	0.054	-0.017	-0.011	0.011	0.014	-0.012	0.003	-0.01	-0.005	0.009	0.007	-0.025	0.014	-0.007	-0.02	0.084
Secondary malignant neoplasm	neoplasms	-0.005	0.009	-0.005	0.013	0.008	0.034	0.039	-0.01	0.019	0.017	-0.026	-0.024	-0.009	-0.015	0.007	0.004	-0.015	0.01	-0.009	-0.012	-0.013	0.008	-0.012	-0.011	0.001	-0.012	-0.008	-0.011	-0.01	-0.006	-0.002	0.007	-0.016	0.025	-0.011	-0.01	0.047
Secondary malignancy of lymph nodes	neoplasms	0.004	0.013	-0.007	0	0.002	0.021	0.038	-0.012	0.007	0.009	-0.028	-0.03	0.003	-0.016	0.005	-0.002	-0.024	0.005	-0.013	-0.003	-0.012	0.013	-0.015	-0.014	0.006	0.003	-0.012	-0.008	-0.003	-0.011	-0.006	-0.004	-0.017	0.003	-0.003	-0.013	0.041
Secondary malignancy of respiratory organs	neoplasms	-0.012	-0.004	-0.007	-0.001	-0.006	0.014	0.015	-0.008	0.018	0.011	-0.024	-0.016	-0.004	-0.013	-0.009	-0.005	-0.011	-0.001	-0.011	-0.008	-0.011	0.006	-0.01	-0.009	-0.002	-0.011	-0.005	-0.007	-0.009	-0.007	0.01	-0.002	-0.014	-0.002	-0.009	-0.009	0.037
Secondary malignant neoplasm of digestive systems	neoplasms	0.005	0.001	0.004	-0.011	-0.006	0.007	0.01	-0.006	0.012	-0.008	-0.022	-0.015	-0.008	-0.01	0.002	0	-0.012	-0.001	-0.002	0.006	-0.008	0.007	-0.008	-0.007	0.002	-0.009	-0.001	-0.018	-0.007	-0.01	-0.006	0.002	-0.011	0.006	-0.007	-0.007	0.026
Secondary malignant neoplasm of liver	neoplasms	0	0.003	-0.006	-0.004	-0.005	0.009	0.026	-0.008	0.023	-0.002	-0.027	-0.019	-0.003	-0.012	-0.009	-0.004	-0.015	0	-0.005	0.002	-0.01	0.006	-0.009	-0.009	-0.001	-0.009	-0.004	-0.011	-0.008	-0.001	-0.007	0.014	-0.013	0.004	-0.008	-0.008	0.007
Secondary malignancy of brain/spine	neoplasms	0.006	0.008	0	-0.004	0.001	0.009	0.042	-0.006	0.02	0.021	-0.014	-0.014	-0.012	-0.009	0.022	-0.004	-0.011	-0.009	-0.008	-0.005	-0.008	0.007	-0.007	-0.007	0.033	-0.003	-0.008	-0.007	0.004	-0.009	0.006	0.003	-0.01	0.014	-0.006	-0.006	0.017
Secondary malignancy of bone	neoplasms	-0.012	-0.016	-0.003	0.004	0.007	0.008	0.027	-0.008	0.009	0.004	-0.021	-0.02	-0.008	-0.013	0.012	-0.007	-0.011	-0.012	-0.006	-0.017	-0.011	-0.01	-0.01	-0.009	0.005	-0.015	-0.011	-0.006	-0.009	-0.007	0.009	0.005	-0.014	-0.002	-0.009	-0.009	0.018
Neoplasm of uncertain behavior	neoplasms	0.04	0.032	0	-0.003	-0.013	0.015	0.01	-0.016	0.031	-0.012	-0.042	-0.04	-0.013	-0.03	0.007	0.036	-0.034	0.009	-0.006	-0.004	-0.021	0.018	-0.011	-0.019	0.017	-0.009	-0.012	-0.016	-0.005	0.003	0.006	0.01	-0.028	-0.012	-0.01	-0.015	0.037
Myeloproliferative disease	neoplasms	0.018	0.002	0.008	0.011	0.005	0.023	0.032	0.001	0.019	-0.009	-0.019	-0.015	0.002	-0.012	-0.001	0.017	-0.015	0.001	0.002	0	-0.01	0.007	-0.002	-0.008	-0.001	-0.001	-0.01	-0.01	0	0.011	0.02	-0.009	-0.007	0.017	0.008	-0.008	0.034
Non-Hodgkins lymphoma	neoplasms	-0.004	-0.009	-0.007	0.004	0.006	0.015	0.024	-0.009	-0.007	0.001	-0.033	-0.023	-0.001	-0.015	0.002	0.014	-0.014	0.022	-0.008	-0.022	-0.012	-0.002	-0.005	-0.01	-0.004	-0.004	-0.002	-0.011	-0.01	-0.014	0.014	-0.011	-0.011	0.001	-0.01	-0.01	0.023
Benign neoplasm of colon	neoplasms	0.062	0.081	0.015	0.068	0.059	0.029	0.036	-0.02	0.023	-0.003	-0.126	-0.107	-0.015	-0.066	0.04	0.104	-0.08	0.056	0.008	0.004	-0.055	0.104	-0.047	-0.044	0.034	0.004	-0.03	0.032	0.014	0.003	0.01	0.028	-0.07	0.001	-0.005	-0.042	0.143
Benign neoplasm of other parts of digestive system	neoplasms	0.037	0.043	0.01	0.01	0.013	0.01	0.035	-0.01	0.018	-0.012	-0.027	-0.022	0.002	-0.016	0.005	0.055	-0.017	0.026	0.004	0.003	-0.014	0.049	-0.013	-0.012	0.011	0.012	-0.004	0.017	0.025	0.014	0.011	0.016	-0.014	0.027	0.006	-0.005	0.027
Lipoma	neoplasms	0.032	0.018	-0.001	0.002	0.012	0.013	-0.008	-0.009	0.022	0	-0.02	-0.021	-0.006	-0.011	0.001	0.02	-0.011	0.016	-0.009	0.001	-0.007	0.015	-0.012	0.002	-0.005	-0.006	-0.008	0.004	0.009	-0.015	0.005	0.025	-0.012	0.002	-0.004	0.003	0.037
Lipoma of skin and subcutaneous tissue	neoplasms	0.006	0.03	0.001	-0.008	0.012	0.016	0.002	-0.001	0.022	-0.004	-0.016	-0.019	-0.007	-0.01	0.022	0.024	-0.01	0.033	-0.002	0.01	-0.001	0.031	-0.011	-0.003	-0.004	0.007	-0.012	0.017	0.004	0.001	-0.009	0.035	-0.015	0.005	-0.01	-0.01	0.019
Other benign neoplasm of connective and other soft tissue	neoplasms	0.023	0.034	0.026	0.01	0.001	0.006	-0.005	0.023	0.014	0.009	-0.001	-0.015	0.017	-0.014	-0.01	0.033	-0.005	0.013	0.02	0.003	0.006	0.028	-0.004	-0.003	-0.003	0.012	0.005	0.042	0.012	0.022	0.008	-0.003	-0.01	0.011	0.004	-0.002	0.01
Benign neoplasm of skin	neoplasms	0.06	0.084	0.029	0.016	0.012	-0.001	-0.012	-0.009	0.042	-0.007	-0.069	-0.071	-0.004	-0.04	0.003	0.085	-0.042	0.048	0.017	0.021	-0.028	0.069	-0.009	-0.027	0.009	0.017	-0.004	0.076	0.02	-0.005	0.009	0.026	-0.041	-0.009	-0.005	-0.025	0.009
Screening for malignant neoplasms of the skin	neoplasms	0.083	0.123	0.042	0.04	0.022	-0.009	-0.021	0.002	0.056	0.002	-0.088	-0.072	-0.011	-0.031	-0.006	0.123	-0.042	0.071	0.046	0.057	-0.035	0.132	-0.027	-0.028	0.004	0.007	-0.023	0.154	0.02	0.017	0.011	0.018	-0.041	-0.006	-0.001	-0.026	0.076
Nevus, non-neoplastic	neoplasms	0.006	0.017	0	-0.002	0.003	0.003	-0.01	-0.007	0.004	-0.006	-0.03	-0.028	-0.012	-0.01	-0.005	0.009	-0.024	0.002	0.001	0.003	-0.012	0.007	-0.011	-0.014	0.005	0.008	-0.005	0.004	0.002	-0.002	0.005	-0.005	-0.018	-0.017	-0.004	-0.009	-0.003
Uterine leiomyoma	neoplasms	0.045	0.062	0.026	-0.002	-0.003	-0.002	0.005	-0.001	0.031	0.027	-0.046	-0.042	-0.003	-0.027	-0.009	0.073	-0.031	0.036	0.03	0.009	-0.019	0.059	-0.018	-0.015	0.002	0.023	0.012	0.02	0.023	0.01	0.005	0.005	-0.029	0.001	-0.004	-0.018	0.018
Benign neoplasm of eye, uveal	neoplasms	0.01	0.035	0.01	0.018	0.035	0.026	0.006	0.009	0.013	0.011	-0.021	-0.02	-0.008	-0.013	-0.009	0.029	-0.011	0.013	0	0.005	-0.004	0.037	-0.01	-0.002	0.013	0.004	0.007	-0.005	0.015	0.009	0.001	0.005	-0.014	0.002	0.014	-0.009	0.014
Benign neoplasm of brain, cranial nerves, meninges	neoplasms	0.032	-0.001	-0.01	-0.008	-0.004	0.031	0.034	-0.007	0.023	-0.009	-0.007	-0.014	-0.006	-0.012	0.023	0.011	-0.005	0.002	0.015	-0.004	-0.003	0.029	-0.009	0	0.008	0.021	0.01	0.004	0.001	0.006	0.003	0	0.004	0.01	0.008	-0.008	0.002
Benign neoplasm of adrenal gland	neoplasms	-0.002	0.011	0.01	0.001	0.012	0.024	0.027	0.005	0.015	0.01	-0.009	-0.011	0.003	-0.003	0.011	0.024	-0.006	0.008	-0.001	0.007	0	0.02	-0.008	-0.007	0.002	0.005	-0.008	0.018	0.003	0.011	0.028	0.011	-0.004	0.022	0.003	0.003	0.058
Benign neoplasm of pituitary gland and craniopharyngeal duct (pouch)	neoplasms	0.012	0.002	0.004	0.007	-0.006	0.008	0.011	-0.006	0.009	0.011	-0.006	-0.015	0.025	-0.01	-0.007	0.011	-0.006	-0.005	-0.001	-0.003	-0.008	0.011	-0.008	-0.007	0.003	0.001	0.015	0.01	-0.007	0.004	-0.006	-0.007	-0.01	0.012	-0.007	-0.007	-0.001
Hemangioma and lymphangioma, any site	neoplasms	0.013	0.032	0.015	0.006	0.005	0.012	0.004	0.007	0.023	-0.004	-0.009	-0.011	0.006	-0.014	-0.01	0.031	0	0.02	0.015	0.021	-0.011	0.021	-0.011	-0.01	-0.01	-0.002	-0.012	0.01	0.012	-0.003	0	0.004	0.004	-0.004	-0.002	-0.002	0.014
Hemangioma of skin and subcutaneous tissue	neoplasms	0.024	0.02	0.007	0.006	-0.003	-0.006	0	-0.008	0.021	-0.004	-0.021	-0.018	-0.01	-0.014	0.017	0.028	-0.013	0.006	-0.007	-0.011	-0.011	0.01	-0.011	-0.01	-0.003	0.005	0.006	0.024	-0.002	-0.008	0.008	-0.01	-0.005	0.007	-0.002	-0.009	0.033
Simple and unspecified goiter	endocrine/metabolic	0.004	0.026	0.009	0.013	0.016	0.002	0.006	0.004	0.023	0.017	-0.014	-0.021	0.025	-0.002	0.001	0.059	-0.015	0.036	0.006	0.012	-0.008	0.041	0.016	-0.011	0.001	0.012	0.007	0.017	0.015	-0.006	-0.002	0.007	-0.012	-0.005	-0.004	-0.01	0.012
Nontoxic nodular goiter	endocrine/metabolic	0.026	0.019	-0.007	0.001	0	-0.008	-0.007	-0.006	0.008	0.001	0	-0.011	0.009	0.004	0.002	0.01	-0.012	0.008	-0.001	0	0	0.012	0.001	-0.007	0.002	-0.004	0.007	0.017	-0.007	-0.003	-0.006	-0.007	-0.004	0.012	0.003	-0.007	0.018
Nontoxic uninodular goiter	endocrine/metabolic	0.012	0.024	-0.003	0.01	0.016	0.001	0.007	-0.001	0.03	0.013	-0.039	-0.04	0.005	-0.02	-0.003	0.053	-0.027	0.018	0.01	-0.003	-0.019	0.033	-0.011	-0.015	0.006	0.005	0	0.009	-0.003	0.01	0.005	0.001	-0.024	0.009	0.01	-0.015	0.027
Nontoxic multinodular goiter	endocrine/metabolic	0.023	0.014	0.001	0.006	-0.004	-0.012	-0.003	0	0.016	0.019	-0.037	-0.035	-0.001	-0.023	-0.009	0.022	-0.021	0.019	0.013	-0.003	-0.015	0.015	-0.01	-0.012	0.022	-0.007	-0.002	-0.001	-0.002	0.009	0.011	0	-0.021	-0.009	0.001	-0.015	0.025
Thyrotoxicosis with or without goiter	endocrine/metabolic	0.01	0.034	0.009	0.031	0.029	0.005	0.017	0.009	0.039	0.004	-0.024	-0.02	0.011	-0.005	0.01	0.042	-0.014	0	0.021	0.02	-0.009	0.038	-0.013	0	-0.006	0.008	0	0.014	0.001	0.025	-0.003	0.021	-0.01	0.014	0	-0.011	0.052
Graves' disease	endocrine/metabolic	0	0.026	0.007	0.015	0.009	0.009	0.003	-0.008	0.026	0.005	-0.022	-0.012	-0.003	0.004	-0.002	0.021	-0.006	0	0.001	0.029	0.003	0.011	-0.009	-0.009	-0.001	0.006	-0.004	0.008	0.008	0.005	-0.007	0.014	-0.003	0.016	-0.009	0	0.029
Secondary hypothyroidism	endocrine/metabolic	0.001	0.005	0.002	0.003	0.008	0.001	0.024	-0.006	0.028	0.004	-0.024	-0.025	0.018	-0.001	-0.004	0.04	-0.02	0.003	0.015	0.007	-0.007	0.026	-0.015	-0.013	0.011	0.029	-0.008	-0.001	-0.002	0.007	-0.006	0.015	-0.01	0.003	0.007	-0.013	0.032
Acquired hypothyroidism	endocrine/metabolic	0.022	0.027	0.017	0.02	0.001	0.033	0.035	0.019	0.07	-0.003	-0.017	-0.021	0.02	-0.017	0.003	0.057	-0.009	0.005	0.007	0.043	-0.017	0.045	0.014	0.004	0.017	0.041	0.005	-0.008	0.015	0.027	0.026	0.012	-0.013	0.014	0.004	-0.004	0.036
Hypothyroidism NOS	endocrine/metabolic	0.043	0.061	0.021	0.009	0.009	0.034	0.038	0.01	0.059	0.016	-0.067	-0.065	0.049	-0.033	0.017	0.111	-0.04	0.057	0.031	0.038	-0.024	0.103	-0.002	-0.02	0.009	0.038	0.002	0.006	0.031	0.028	0.022	0.041	-0.047	0.017	0.018	-0.031	0.06
Chronic lymphocytic thyroiditis	endocrine/metabolic	0.008	0.013	0.015	0.004	-0.004	0.026	0.004	0.014	0.018	0.002	0.024	-0.009	0.002	-0.01	-0.008	0.021	-0.015	0.007	0.006	0.025	0.008	0.024	-0.004	-0.012	-0.002	0.03	0.003	0.024	0.016	0.014	0.002	0.014	-0.015	-0.004	0.01	-0.001	-0.008
Other disorders of thyroid	endocrine/metabolic	0.038	0.039	0.023	0.006	-0.009	0.011	0.006	0.001	0.04	-0.009	-0.011	-0.023	0.041	-0.014	-0.003	0.058	-0.01	0.008	0.009	0.035	-0.006	0.063	0.019	-0.008	-0.008	0.062	0.015	0.021	-0.012	0.036	0.008	0.028	-0.019	0.009	0.003	-0.012	0.048
Abnormal results of function study of thyroid	endocrine/metabolic	0.015	0.035	0.02	0.006	0.001	0.02	0.009	-0.005	0.029	-0.004	0.031	0.02	0.015	0.031	-0.003	0.03	0.015	-0.002	0.017	0.021	0.017	0.025	0.005	0.024	0.013	0.023	0.033	0.036	0.01	0.002	0.008	0.013	0.013	-0.002	0.009	-0.007	0.002
Secondary diabetes mellitus	endocrine/metabolic	0.008	0.019	0.019	0.043	0.031	0.031	0.077	0.03	0.031	0.014	-0.012	-0.018	0.04	-0.006	-0.001	0.029	-0.005	0.018	-0.01	0.014	-0.003	0.041	-0.001	0	0	0.033	0.017	-0.001	0.018	0.042	0.051	0.023	-0.007	0.071	0.017	-0.008	0.037
Diabetes mellitus	endocrine/metabolic	-0.001	-0.001	-0.007	0.007	-0.008	0.025	0.054	-0.005	-0.003	0.042	-0.033	-0.027	0.001	-0.018	0.013	0.035	-0.012	0.002	-0.003	-0.012	-0.01	0.031	-0.014	-0.007	0.035	0.026	-0.006	-0.022	-0.001	0.002	0.008	0.008	-0.019	0.007	0.004	-0.007	0.015
Type 1 diabetes	endocrine/metabolic	0.013	0.031	0.004	0.014	0.012	0.038	0.086	0.022	0.028	0.034	-0.014	-0.014	0.024	-0.012	0.031	0.076	-0.014	0.023	0.016	0.01	-0.007	0.053	-0.005	-0.006	0.037	0.037	0.007	-0.005	0.027	0.014	0.039	0.01	-0.02	0.039	0.008	-0.005	0.045
Type 1 diabetes with neurological manifestations	endocrine/metabolic	-0.003	0.017	-0.002	0.017	0.01	0.045	0.052	0.015	-0.001	0.018	-0.02	-0.011	0.013	-0.01	0.001	0.042	-0.007	0.02	-0.009	0.011	-0.008	0.028	0	-0.007	0.002	0.037	-0.009	-0.016	0.012	0.01	0.015	0.01	-0.011	0.04	0.002	-0.007	0.024
Type 2 diabetes	endocrine/metabolic	0.025	0.04	-0.01	0.021	0.02	0.055	0.11	0.002	0.036	0.007	-0.091	-0.079	0.028	-0.048	0.03	0.12	-0.049	0.039	0.042	0.003	-0.041	0.097	-0.03	-0.03	0.043	0.021	-0.005	-0.026	0.029	0.016	0.025	0.025	-0.052	0.04	0.01	-0.029	0.143
Type 2 diabetes with renal manifestations	endocrine/metabolic	0.011	0.034	0.001	0.004	-0.003	0.052	0.131	0.013	0.022	0.009	-0.037	-0.037	0.008	-0.021	0.046	0.067	-0.02	0.033	0.014	0.008	-0.02	0.074	-0.018	-0.013	0.023	0.028	0	-0.021	0.031	0.021	0.024	0.011	-0.02	0.037	0.012	-0.012	0.09
Type 2 diabetes with ophthalmic manifestations	endocrine/metabolic	0.021	0.013	-0.006	0.016	0.007	0.052	0.09	0.018	0.012	0.016	-0.025	-0.024	0.014	-0.016	0.029	0.049	0.002	0.002	0.005	-0.001	-0.008	0.044	-0.007	-0.005	0.031	0.036	0.006	-0.019	0.027	0.011	0.047	0.012	-0.005	0.02	0.02	0.002	0.049
Type 2 diabetes with neurological manifestations	endocrine/metabolic	0.033	0.04	0.009	0.02	0.016	0.061	0.13	0.007	0.049	0.013	-0.048	-0.042	0.035	-0.027	0.042	0.102	-0.021	0.035	0.009	0.015	-0.02	0.106	-0.021	-0.016	0.041	0.03	-0.003	-0.018	0.019	0.028	0.038	0.043	-0.027	0.055	0.014	-0.015	0.098
Diabetes type 2 with peripheral circulatory disorders	endocrine/metabolic	-0.001	0.002	-0.003	-0.01	-0.002	0.069	0.074	0	0.005	-0.003	-0.029	-0.02	-0.004	-0.013	0.026	0.033	-0.012	0.005	0	-0.001	-0.011	0.034	-0.01	-0.009	0.005	0.008	0.007	-0.012	-0.001	-0.002	0.001	-0.002	-0.009	0.033	-0.002	-0.009	0.06
Insulin pump user	endocrine/metabolic	0.023	0.043	0.004	0.028	0.014	0.059	0.149	0.012	0.047	0.01	-0.033	-0.038	0.024	-0.022	0.019	0.085	-0.016	0.029	0.019	0.021	-0.016	0.098	-0.004	-0.005	0.017	0.044	0.001	-0.008	0.023	0.016	0.043	0.019	-0.022	0.063	0.022	-0.011	0.114
Impaired fasting glucose	endocrine/metabolic	0.038	0.053	0.024	0.04	0.024	0.004	-0.003	0.009	0.021	0.012	-0.057	-0.057	0.019	-0.028	0	0.075	-0.036	0.059	0.024	0	-0.027	0.079	-0.008	-0.016	0.004	0.007	0.001	0.047	0.031	0.014	0	0.04	-0.033	-0.016	0.021	-0.014	0.054
Other abnormal glucose	endocrine/metabolic	0.017	0.042	0.01	0.019	0.019	0.056	0.053	-0.003	0.034	-0.007	-0.07	-0.06	0.002	-0.029	0.016	0.091	-0.042	0.058	0.007	-0.007	-0.031	0.052	-0.019	-0.022	0.029	0.026	-0.011	0.014	0.022	-0.003	0.001	0.009	-0.034	0.013	0.017	-0.028	0.079
Polyneuropathy in diabetes	endocrine/metabolic	0.025	0.035	0.008	0.022	0.022	0.047	0.124	0.008	0.034	0.014	-0.035	-0.032	0.032	-0.021	0.029	0.09	-0.015	0.023	0.01	0.014	-0.017	0.09	-0.012	-0.015	0.035	0.032	-0.007	-0.016	0.024	0.029	0.035	0.042	-0.019	0.066	0.009	-0.01	0.079
Diabetic retinopathy	endocrine/metabolic	0.014	0.012	-0.008	0.016	0.008	0.047	0.106	0.002	0.015	0.003	-0.03	-0.026	0.013	-0.017	0.037	0.048	-0.004	0.002	0.007	-0.003	-0.014	0.046	-0.008	-0.006	0.039	0.034	0	-0.022	0.006	0.008	0.036	0.01	-0.007	0.022	0.011	0	0.052
Hypoglycemia	endocrine/metabolic	0.02	0.067	0.024	0.015	0.017	0.041	0.036	0.023	0.071	0.015	0.025	0.009	0.055	0.03	0.005	0.076	0.025	0.03	0.046	0.052	0.027	0.057	0.03	0.006	-0.006	0.028	0.01	0.022	0.032	0.014	0.039	0.046	0.018	0.028	0.031	0.007	0.038
Hyperparathyroidism	endocrine/metabolic	0.018	0.009	0.031	0.022	0.004	0.011	0.017	0	0.024	0.015	-0.025	-0.026	0.017	-0.015	-0.003	0.045	-0.013	0.033	0.012	0.001	-0.011	0.041	-0.014	-0.008	0.002	0.016	-0.003	0.001	0.02	0.012	0.001	0.017	-0.009	0.044	0.003	-0.002	0.021
Disorders of the pituitary gland and its hypothalamic control	endocrine/metabolic	0.013	0.019	0	0.008	0.007	0	0.018	-0.006	0.021	0.039	0.002	-0.005	0.01	-0.002	0.003	0.014	0.017	0.01	-0.001	0.016	0.018	0.031	0.002	0.023	0.003	0.017	0.017	0.004	0.004	-0.002	-0.006	0.022	0.017	0.013	-0.007	0.014	0.004
Pituitary hyperfunction	endocrine/metabolic	0.007	0.015	0.012	-0.004	-0.005	0.001	0.007	-0.006	0.016	0.041	0.024	0	0.028	0.005	-0.007	0.028	0.001	0.021	0.024	0.014	0.036	0.026	0.002	-0.006	0.014	0.039	0.026	0.006	-0.006	0.021	0.006	0.003	-0.003	0.015	0.014	0.026	0.006
Pituitary hypofunction	endocrine/metabolic	0.006	-0.015	-0.012	0.002	0.001	0	0.006	-0.006	0.016	0.021	0.059	0.027	-0.001	0.047	0.003	0.002	0.063	0.005	0.007	0.012	0.034	0.001	-0.007	0.063	0.003	-0.004	0.033	0.012	0.004	0.005	0.006	0.003	0.036	0.003	0.003	0.045	0.001
Disorders of adrenal glands	endocrine/metabolic	0.019	0.013	0.022	-0.003	0.006	0.031	0.042	0.002	0.022	-0.001	-0.013	-0.014	0.021	-0.012	0.007	0.022	-0.014	0.006	0.028	0.013	-0.01	0.023	-0.009	0	0.016	0.004	-0.003	0.014	0.017	0.018	0.031	0.007	-0.012	0.027	0	-0.008	0.066
Glucocorticoid deficiency	endocrine/metabolic	0.017	0.017	0.007	0.025	0.009	0.041	0.085	0.001	0.043	0.02	0.014	0.018	0.032	-0.007	0.021	0.036	0.026	0.023	0.001	0.013	0.01	0.027	-0.009	-0.001	0.022	0.026	0.015	-0.004	0.024	0.011	0.011	0.036	0.013	0.053	-0.008	0.016	0.021
Polycystic ovaries	endocrine/metabolic	0.012	0.041	0.041	0.001	-0.004	0	-0.009	0.015	0.051	0.009	0.003	-0.015	0.055	0.005	-0.01	0.054	-0.005	0.038	0.036	0.032	0.006	0.059	0.051	-0.003	0.004	0.042	0.011	0.025	0.033	0.036	0	0.016	-0.001	0.003	0.018	-0.009	0.019
Testicular hypofunction	endocrine/metabolic	0.017	0.015	0.03	0.028	0.026	0.019	0.026	-0.011	0.028	0.01	-0.017	-0.026	0.005	-0.015	0.021	0.057	-0.02	0.025	-0.012	0.009	-0.015	0.037	-0.014	-0.003	0.023	0.029	0.006	-0.009	0.004	0.005	0.013	0.027	-0.013	0.038	-0.002	-0.002	0.034
Other endocrine disorders	endocrine/metabolic	-0.01	0.02	-0.007	0.006	-0.001	0.007	0.015	0.015	0.034	0.01	0.061	0.028	0.002	0.016	0.01	0.015	0.036	-0.006	0.005	0.031	0.023	0.001	0.001	0.002	0.011	0.023	0.029	0.013	0.012	0.004	0.005	0.002	0.026	0.006	-0.007	0.031	-0.001
Protein-calorie malnutrition	endocrine/metabolic	0.018	0.038	0.015	0.041	0.039	0.105	0.164	0.004	0.069	0.026	0.039	0.027	0.015	0.008	0.028	0.073	0.052	0.052	0.055	0.04	0.004	0.062	0.002	0.015	0.02	0.041	0.019	0.015	0.032	0.03	0.022	0.038	0.028	0.071	0.026	0.032	0.07
severe protein-calorie malnutrition	endocrine/metabolic	-0.003	0.011	-0.002	0.028	0.01	0.068	0.094	-0.006	0.031	0.043	-0.014	-0.016	0.012	-0.01	0.028	0.028	-0.007	0.002	-0.002	0.001	-0.001	0.025	0	-0.007	0.011	0.027	0.006	-0.014	0.002	0.003	0.004	0.019	-0.011	0.044	-0.007	-0.007	0.021
Anorexia	endocrine/metabolic	0.013	0.023	0.013	0.012	0.03	0.044	0.075	0.02	0.041	0.036	0.025	0.024	0.021	0.034	0.03	0.036	-0.005	0.036	0.059	0.041	0.004	0.035	0.006	0.008	0.015	0.028	0.01	0.025	0.042	0.035	0.021	0.046	0.004	0.018	0.033	0	0.029
Vitamin deficiency	endocrine/metabolic	0.006	0.019	0.011	0.014	0.013	0.017	0.029	0.017	0.035	0.03	-0.001	-0.01	0.004	0.004	0.012	0.044	-0.012	0.024	0.07	0.019	0.001	0.033	0.002	-0.007	-0.007	0.027	-0.008	0.015	0.014	0.012	0.006	0.041	-0.004	0.018	0.023	0.004	0.017
Vitamin B-complex deficiencies	endocrine/metabolic	0.012	0.036	0.03	0.035	0.043	0.025	0.045	0.006	0.061	0.008	-0.015	-0.024	0.031	-0.016	0.022	0.1	-0.009	0.047	0.029	0.019	-0.015	0.07	-0.005	-0.011	0.032	0.015	0.021	0.008	0.04	0.007	0.002	0.014	-0.012	0.04	0.016	-0.01	0.054
Vitamin D deficiency	endocrine/metabolic	0.004	0.048	0.034	0.008	-0.001	0.027	0.036	0.005	0.084	0.018	-0.015	-0.044	0.045	-0.005	0.021	0.111	-0.013	0.039	0.046	0.088	-0.006	0.081	-0.008	0.001	0.019	0.048	0.013	0.014	0.028	0.041	0.015	0.021	-0.009	0.049	0.023	-0.014	0.053
Mineral deficiency NEC	endocrine/metabolic	0.024	0.041	0.013	0.022	0.01	0.021	0.019	0.014	0.017	0.043	0.007	-0.008	0.017	0.002	-0.008	0.047	-0.002	0.041	0.041	0.017	-0.009	0.037	0.008	0.011	0.002	0.04	0.006	0.046	0.03	0.023	0.004	0.027	0.007	0.014	0.029	-0.007	0.013
Other nutritional deficiency	endocrine/metabolic	0.024	0.059	0.015	0.006	0.01	0.03	0.02	0.039	0.03	0.029	-0.007	0.006	0.002	-0.009	0.004	0.043	0.008	0.054	0.115	0.034	0.001	0.063	0.015	0.011	0.018	0.002	0	0.052	0.034	0.027	0.008	0.024	0.014	0.011	0.026	-0.009	0.01
Short stature	endocrine/metabolic	-0.012	-0.026	-0.015	-0.014	-0.015	-0.004	-0.006	0.018	0.025	0.026	0.233	0.142	-0.003	0.133	-0.009	-0.033	0.211	-0.011	0.055	0.034	0.112	-0.032	-0.01	0.143	-0.009	0.044	0.039	0.054	-0.008	-0.001	0.019	-0.009	0.139	-0.013	-0.009	0.125	-0.043
Failure to thrive (childhood)	endocrine/metabolic	-0.011	-0.02	-0.006	-0.014	-0.014	0.016	-0.01	0.019	0.019	0.006	0.237	0.189	-0.007	0.121	-0.009	-0.033	0.26	-0.014	0.045	0.031	0.123	-0.026	-0.009	0.102	-0.009	0.031	0.035	0.082	-0.008	-0.012	0.002	-0.009	0.228	-0.012	0	0.122	-0.043
Delayed milestones	endocrine/metabolic	-0.011	-0.023	0.001	-0.013	-0.008	0.005	0.006	0.069	0.027	0.015	0.154	0.344	-0.005	0.156	-0.008	-0.036	0.331	-0.017	0.017	0.031	0.141	-0.033	-0.009	0.195	-0.008	0.01	0.046	0.086	0.001	-0.005	0.013	0	0.332	-0.011	0.009	0.115	-0.041
Lack of normal physiological development, unspecified	endocrine/metabolic	-0.014	-0.024	-0.015	-0.017	-0.018	0.009	0	0.077	0.027	0.013	0.209	0.337	-0.005	0.161	-0.011	-0.045	0.423	-0.016	0.042	0.014	0.177	-0.043	-0.012	0.219	-0.011	0.021	0.066	0.095	0.01	-0.005	-0.002	-0.011	0.316	-0.017	-0.004	0.115	-0.055
Proteinuria	endocrine/metabolic	-0.005	0.014	-0.007	0.006	0.005	0.022	0.061	0.003	0.016	0.007	-0.009	-0.014	0.034	0.003	0.017	0.046	-0.003	0.019	0.015	0.001	-0.001	0.032	0.01	-0.005	0.018	0.021	-0.006	0.008	0.011	0.007	0.004	0.003	-0.006	0.015	-0.009	-0.004	0.064
Paraproteinemia	endocrine/metabolic	-0.002	0.031	-0.012	-0.006	-0.007	0.007	0.03	-0.008	0.001	-0.003	-0.025	-0.02	-0.001	-0.013	0.004	0.012	-0.012	0.011	-0.012	-0.01	-0.011	0.002	-0.01	-0.009	0.005	0.01	-0.005	-0.015	-0.002	0.003	0.009	0.004	-0.005	-0.01	-0.009	-0.009	0.032
Intestinal disaccharidase deficiencies and disaccharide malabsorption	endocrine/metabolic	0.012	0.043	0.031	0.004	-0.001	-0.001	0.023	0.001	0.022	0.007	0.019	0.004	0.014	0.017	-0.008	0.041	0.007	0.042	0.074	0.025	0.008	0.035	0.001	-0.001	0.004	0.022	-0.002	0.055	0.022	0.01	0.015	0.019	0.003	0.005	0.01	0.011	0.03
Disorders of lipoid metabolism	endocrine/metabolic	-0.01	-0.006	0.006	-0.01	-0.014	0.028	0.053	-0.01	-0.005	0.017	-0.028	-0.024	0.004	-0.015	0.036	0.02	-0.012	0.003	-0.014	-0.013	-0.013	0.015	-0.012	-0.011	0.032	0.025	-0.008	-0.028	-0.01	-0.006	-0.009	0.013	-0.016	0.008	0.008	-0.01	0.025
Hyperlipidemia	endocrine/metabolic	0.042	0.086	0.027	0.047	0.044	0.062	0.073	-0.008	0.061	0.012	-0.171	-0.16	0.006	-0.085	0.052	0.156	-0.102	0.083	0.029	0.017	-0.082	0.122	-0.059	-0.052	0.06	0.011	-0.035	0.043	0.033	0.007	0.009	0.036	-0.095	0.02	0.015	-0.062	0.194
Hypercholesterolemia	endocrine/metabolic	0.015	0.027	0.007	0.008	0.014	0.037	0.053	-0.026	0.06	0.003	-0.096	-0.09	-0.002	-0.052	0.061	0.103	-0.056	0.032	0.006	0.012	-0.049	0.056	-0.045	-0.028	0.062	-0.003	-0.01	0.001	0.011	-0.007	0.017	0.011	-0.047	-0.006	0.007	-0.035	0.108
Hyperglyceridemia	endocrine/metabolic	0.021	0.044	0.007	0.018	0.02	0.022	0.008	0.031	0.035	0.023	-0.006	-0.003	0.024	0.022	-0.004	0.056	-0.003	0.039	0.054	0.015	-0.012	0.059	-0.017	0.019	0.004	0.055	0.009	0.033	0.037	0.021	0.02	0.032	0.003	0.005	0.035	0.002	0.031
Mixed hyperlipidemia	endocrine/metabolic	-0.003	-0.001	0	-0.008	-0.014	0.037	0.057	-0.009	0.016	0.017	-0.081	-0.069	0.012	-0.041	0.019	0.072	-0.05	0.035	0.01	-0.011	-0.039	0.026	-0.02	-0.033	0.048	0.03	-0.015	-0.022	0.01	-0.006	0.005	0.005	-0.042	0.005	0.001	-0.028	0.083
Unspecified disorder of lipoid metabolism	endocrine/metabolic	-0.003	0.028	0.013	0.013	0.012	-0.001	-0.002	-0.009	0.013	0.002	-0.021	-0.022	0	-0.01	0.009	0.029	-0.014	0.02	0.008	-0.004	-0.006	0.021	-0.011	-0.01	0.01	0.007	-0.001	0.036	-0.003	0.005	-0.001	-0.004	-0.006	0.002	-0.01	-0.003	0.009
Gout	endocrine/metabolic	-0.004	0.008	0.008	0.035	0.034	0.025	0.06	-0.013	0.003	-0.004	-0.05	-0.042	-0.009	-0.022	0.018	0.024	-0.031	0.015	-0.004	-0.017	-0.022	0.016	-0.018	-0.019	0.009	0.014	-0.008	-0.01	-0.007	0	0.013	0.026	-0.026	0.015	-0.008	-0.015	0.077
Gouty arthropathy	endocrine/metabolic	-0.002	0.006	-0.005	0.018	0.013	0.037	0.045	-0.011	0.001	0.001	-0.032	-0.028	-0.009	-0.011	0.022	0.017	-0.016	-0.003	-0.008	-0.007	-0.015	0.017	-0.014	-0.013	0.018	0.019	0.001	-0.004	-0.007	-0.003	0.019	0.007	-0.02	0.011	0.003	-0.012	0.052
Chondrocalcinosis	endocrine/metabolic	-0.002	0.017	-0.001	0.001	0.012	0	0.011	-0.006	0.004	0.002	-0.012	-0.015	0.004	-0.01	0.011	0.025	-0.012	0.027	0.022	-0.003	-0.008	0.027	0.001	-0.007	0.031	0.006	-0.008	-0.006	-0.007	-0.01	0.005	0.002	-0.01	0.007	-0.007	-0.007	0.026
Disorders of magnesium metabolism	endocrine/metabolic	0.004	0.037	0.006	0.025	0.016	0.038	0.079	-0.003	0.035	0.006	-0.02	-0.024	0.001	-0.007	0.007	0.061	-0.001	0.009	0.035	0.014	-0.002	0.041	-0.012	-0.011	-0.005	0.05	0.012	-0.008	0.015	0.016	0.041	0.025	-0.004	0.051	0.002	0.002	0.076
Disorders of calcium/phosphorus metabolism	endocrine/metabolic	0.004	0.031	0.017	0.016	0.033	0.025	0.03	-0.008	0.039	0.017	-0.005	-0.01	0.019	-0.003	0.011	0.035	0.005	0.029	0.039	0.019	0.007	0.044	0.009	-0.009	0.012	0.01	0.001	0.011	0.021	0.013	0.009	0.004	0.005	0.009	-0.002	-0.009	0.021
Hypocalcemia	endocrine/metabolic	0.001	0.014	0.009	0.007	-0.008	0.025	0.049	0.002	0.014	0.014	-0.012	-0.01	0.022	0	0.007	0.035	0	0.018	0.022	0.02	-0.003	0.028	-0.009	0	0.016	0.021	0.004	-0.009	0.009	0.001	0.032	0.008	-0.001	0.032	0	0.001	0.033
Disorders of phosphorus metabolism	endocrine/metabolic	0.012	0.02	-0.002	0.025	0.023	0.054	0.103	0.001	0.03	-0.009	-0.017	-0.012	0.002	-0.001	0.006	0.043	-0.001	0.034	0.001	-0.001	0.003	0.029	-0.009	0.007	0.007	0.045	-0.01	0.009	0.016	-0.001	0.011	0.014	-0.008	0.041	-0.001	-0.008	0.048
Hypercalcemia	endocrine/metabolic	0.035	0.013	0.022	0.022	0.014	0.039	0.034	-0.002	0.038	0.003	-0.032	-0.026	0.022	-0.017	0.018	0.049	-0.019	0.014	0.001	0.002	-0.017	0.036	-0.011	-0.014	0.033	0.02	-0.013	-0.007	0.011	0.008	0.005	0.013	-0.009	0.021	0.02	-0.009	0.033
Electrolyte imbalance	endocrine/metabolic	-0.001	0.019	0.017	0.031	0.025	0.08	0.121	0.008	0.053	-0.003	-0.019	-0.01	0.028	-0.008	0.047	0.047	0.001	0.012	0.006	0.032	0.002	0.04	-0.003	0.005	0.034	0.033	0.019	0.008	0.029	0.03	0.018	0.019	-0.014	0.044	0.013	-0.001	0.069
Hyposmolality and/or hyponatremia	endocrine/metabolic	0.026	0.042	0.007	0.086	0.072	0.105	0.148	-0.006	0.063	0.02	-0.036	-0.033	0.021	-0.018	0.021	0.08	-0.011	0.04	0.01	0.007	-0.017	0.063	-0.019	-0.005	0.047	0.037	0.003	-0.016	0.026	0.029	0.061	0.03	-0.023	0.061	0.024	-0.012	0.1
Hyperpotassemia	endocrine/metabolic	-0.004	0.019	-0.003	0.039	0.038	0.088	0.172	0.002	0.031	0.017	-0.041	-0.035	0.024	-0.014	0.034	0.074	-0.017	0.023	-0.001	0.002	-0.018	0.042	-0.016	-0.01	0.016	0.034	-0.009	-0.005	0.023	0.001	0.025	0.008	-0.019	0.064	0.014	-0.017	0.109
Hypopotassemia	endocrine/metabolic	0.041	0.062	0.024	0.072	0.058	0.094	0.129	0.019	0.081	0.038	-0.051	-0.047	0.033	-0.025	0.013	0.117	-0.015	0.076	0.019	0.031	-0.024	0.08	-0.007	-0.01	0.027	0.038	-0.001	-0.014	0.047	0.033	0.04	0.044	-0.027	0.063	0.032	-0.015	0.121
Acidosis	endocrine/metabolic	-0.009	0.017	0.007	0.054	0.045	0.107	0.186	0.018	0.03	0.045	-0.025	-0.016	0.02	-0.007	0.022	0.067	0.002	0.036	0.013	-0.003	-0.011	0.049	-0.009	0.013	0.018	0.046	-0.003	-0.015	0.031	0.009	0.032	0.017	-0.009	0.075	0.04	-0.002	0.076
Hypovolemia	endocrine/metabolic	0.033	0.067	0.022	0.054	0.052	0.135	0.174	0.045	0.084	0.052	-0.01	-0.017	0.045	0.002	0.046	0.122	0.015	0.089	0.05	0.03	-0.004	0.106	0	0.017	0.034	0.069	0.005	0.007	0.063	0.07	0.069	0.041	0.008	0.094	0.064	0.003	0.128
Fluid overload	endocrine/metabolic	-0.014	0.019	-0.001	0.022	0.002	0.093	0.15	-0.006	0.028	0.009	-0.038	-0.027	0.018	-0.016	0.02	0.042	-0.003	0.032	-0.009	-0.008	-0.012	0.034	-0.01	-0.008	0.011	0.021	-0.012	-0.022	0.003	0.003	0.012	0.01	-0.017	0.046	0.007	-0.008	0.092
Other disorders of metabolism	endocrine/metabolic	0.021	0.02	0.009	0.013	0.007	-0.005	0.023	-0.008	0.034	0.031	0.04	0.06	0.008	0.023	0.005	0.02	0.053	0.037	0.035	0.038	0.02	0.027	0.003	0.035	0.005	0.041	0.025	0.021	0.006	0.014	0.026	0.019	0.025	0.021	-0.002	0.022	0.015
Other disorders of lipoid metabolism	endocrine/metabolic	0.028	0.031	-0.003	0.033	0.04	0.002	0.002	0.009	0	0.005	-0.021	-0.019	0.009	-0.013	0.005	0.023	-0.011	0.043	0.007	0.003	-0.004	0.033	-0.003	-0.009	-0.009	0.013	-0.005	0.027	0.015	0.021	0.019	0.005	-0.013	0.019	0.014	-0.009	0.012
Lipoprotein disorders	endocrine/metabolic	0.002	-0.013	-0.006	-0.008	-0.013	-0.006	-0.01	0.006	0.005	0.002	0.006	0.013	0.015	0.024	-0.004	-0.001	0.018	-0.005	0.014	0.001	0.011	0.005	-0.011	0.017	-0.01	0.01	0.015	0.003	-0.01	0.001	-0.001	-0.01	0.007	-0.005	-0.003	-0.003	0.012
Dysmetabolic syndrome X	endocrine/metabolic	0.001	0.007	0.004	0.002	-0.006	0.004	-0.011	0.021	0.019	0.018	0.001	0.005	0.022	0.034	-0.007	0.03	-0.005	0.02	0.046	0.012	0	0.031	0.002	0.01	-0.001	0.035	0.013	0.033	0.023	0.016	0.009	0.015	0	-0.008	0.005	-0.012	0.012
Overweight, obesity and other hyperalimentation	endocrine/metabolic	0.036	0.055	0.036	0.039	0.035	0.047	0.052	0.013	0.08	0.048	0.016	-0.002	0.039	0.022	0.004	0.091	0.008	0.051	0.027	0.056	0.01	0.075	-0.012	0	0.012	0.062	0.023	0.056	0.021	0.013	0.018	0.037	0.012	0.03	0.013	-0.007	0.066
Obesity	endocrine/metabolic	0.06	0.135	0.062	0.057	0.039	0.034	0.05	0.041	0.121	0.028	-0.008	-0.038	0.061	0.031	0.002	0.209	-0.012	0.1	0.099	0.071	-0.003	0.199	0.049	0.013	0.006	0.061	0.017	0.09	0.06	0.066	0.049	0.058	-0.016	0.043	0.039	-0.01	0.155
Morbid obesity	endocrine/metabolic	0.055	0.126	0.045	0.039	0.027	0.034	0.063	0.035	0.113	0.019	-0.044	-0.056	0.062	-0.014	-0.011	0.193	-0.024	0.095	0.139	0.08	-0.024	0.21	0.058	-0.011	-0.005	0.041	0.023	0.044	0.062	0.069	0.032	0.049	-0.032	0.046	0.034	-0.023	0.14
Abnormal weight gain	endocrine/metabolic	0.016	0.054	0.033	0.001	-0.001	0.01	0.017	0.021	0.093	0.049	0.047	0.028	0.036	0.049	0.015	0.082	0.058	0.032	0.077	0.055	0.043	0.063	0.027	0.028	0.003	0.058	0.037	0.059	0.005	0.041	0.035	0.042	0.038	0.017	0.018	0.03	0.016
Disorders involving the immune mechanism	endocrine/metabolic	-0.004	0.036	0.033	0.026	0.017	0.027	0.064	0.033	0.047	0.003	0.016	0.016	0.031	0.014	-0.002	0.033	0.031	0.028	0.015	0.03	0.009	0.035	-0.013	0.016	0.004	0.026	0.027	0.04	0.017	0.024	0.029	0.025	0.041	0.039	-0.001	0.023	0.023
Immunity deficiency	endocrine/metabolic	-0.007	0.013	0.015	0.017	0.005	0.038	0.067	0.022	0.032	0.009	0.005	0.001	0.02	0.008	0.015	0.049	0.023	0.027	-0.001	0.004	0.001	0.053	-0.013	0	0.039	0.043	0	0.01	0.048	0.017	0.003	0.032	0.009	0.032	0.006	0.006	0.025
Deficiency of humoral immunity	endocrine/metabolic	-0.006	0.018	0.003	0.011	0	0.029	0.059	0.001	0.028	0.013	0.023	0.037	0.006	0.01	-0.009	0.015	0.04	0.012	0.014	0	0.01	0.005	-0.002	0.007	-0.009	0.022	-0.01	0.007	0	0.011	0.011	0.006	0.008	0.013	-0.008	0.016	0.008
Autoimmune disease NEC	endocrine/metabolic	0.013	0.015	0.016	0.001	0	0.032	0.017	-0.006	0.021	0.002	-0.015	-0.01	0.015	-0.01	0.002	0.023	-0.006	0.004	0.022	0.004	-0.008	0.019	-0.007	-0.007	-0.007	0.011	0.024	0.03	0.004	0.04	0.017	0.021	-0.004	0.007	-0.007	-0.007	0.011
Other immunological findings	endocrine/metabolic	0.013	0.022	0.023	0.005	0.02	0.009	0.028	0.014	0.041	0.003	0.003	-0.016	0.021	-0.005	-0.007	0.04	-0.005	0.028	0.006	0.029	-0.005	0.027	0.002	-0.012	0.01	0.049	0.017	0.013	0.023	0.048	0.016	0.014	-0.011	0.047	0.027	0.011	0.042
Iron deficiency anemias, unspecified or not due to blood loss	hematopoietic	0.015	0.072	0.025	0.05	0.043	0.078	0.101	0.018	0.081	0.02	-0.026	-0.038	0.041	-0.011	0.007	0.133	-0.023	0.074	0.065	0.055	-0.016	0.121	0.021	-0.014	0.025	0.036	0.002	0.038	0.045	0.041	0.035	0.031	-0.022	0.054	0.029	-0.013	0.092
Iron deficiency anemia secondary to blood loss (chronic)	hematopoietic	-0.012	0.028	0.011	0.03	0.034	0.037	0.055	-0.004	0.029	-0.002	-0.017	-0.021	0.022	-0.009	-0.002	0.055	-0.008	0.015	0.02	0.024	-0.014	0.03	-0.013	-0.001	0.004	0.024	-0.01	-0.006	0.029	0.016	0.003	0.02	-0.007	0.021	0.022	-0.006	0.074
Pernicious anemia	hematopoietic	-0.001	0.038	0.019	-0.004	0.008	0.018	0.032	0.006	0.04	0.013	-0.003	-0.014	0.006	-0.009	0.023	0.059	-0.005	0.011	0.017	0.051	-0.008	0.04	-0.007	0.004	0.004	0.019	0.018	0.003	0.005	0.021	0.019	0.024	-0.003	0.026	0.015	-0.006	0.022
Other vitamin B12 deficiency anemia	hematopoietic	-0.005	0.01	-0.005	-0.003	0.006	0.003	0.033	-0.007	0.029	-0.009	-0.018	-0.018	0.003	-0.012	0.007	0.063	-0.014	0.009	-0.004	0.018	-0.01	0.047	-0.002	-0.008	0.023	0.004	-0.01	0	0.009	-0.006	0.002	-0.009	-0.007	0.026	0	-0.008	0.032
Deficiency anemias	hematopoietic	0.016	0.025	0.002	0.077	0.047	0.05	0.07	0.023	0.03	0.033	-0.018	-0.016	0.021	-0.011	0.026	0.046	-0.008	0.035	0.018	0.006	-0.009	0.031	-0.008	-0.007	0.01	0.03	-0.002	0.022	0.039	0.009	0.014	0.052	-0.011	0.046	0.037	-0.007	0.051
Pancytopenia	hematopoietic	-0.006	0.015	-0.011	0.019	0.008	0.046	0.108	-0.008	0.02	0.005	-0.026	-0.016	0.005	-0.013	0.005	0.025	-0.002	-0.008	0.001	-0.016	-0.01	0.023	-0.01	-0.001	-0.001	0.017	-0.005	0.019	-0.001	-0.001	0.019	0.006	-0.013	0.027	-0.001	-0.009	0.039
Other anemias	hematopoietic	0.036	0.087	0.018	0.078	0.064	0.086	0.154	0.01	0.108	0.03	-0.066	-0.079	0.032	-0.039	0.053	0.164	-0.036	0.083	0.05	0.028	-0.03	0.128	-0.007	-0.026	0.041	0.053	-0.002	0.011	0.057	0.031	0.041	0.048	-0.038	0.073	0.032	-0.024	0.138
Acute posthemorrhagic anemia	hematopoietic	0.001	0.003	-0.013	0.023	0.02	0.057	0.117	-0.007	0.022	0.009	-0.045	-0.04	-0.004	-0.021	0.01	0.052	-0.021	0.021	0.01	-0.01	-0.021	0.031	-0.013	-0.018	0.023	0.017	-0.013	-0.03	0.026	-0.009	0.02	0.036	-0.027	0.039	0.005	-0.018	0.113
Anemia of chronic disease	hematopoietic	0.019	0.019	0.004	0.018	0	0.047	0.077	-0.006	0.017	0.01	-0.019	-0.015	0.009	-0.003	0.039	0.046	-0.001	0.022	-0.001	0.003	-0.008	0.024	0.001	-0.007	0.002	0.024	-0.001	-0.007	0.003	0.004	0.027	0.011	-0.011	0.042	-0.007	0.003	0.04
Anemia in chronic kidney disease	hematopoietic	-0.017	-0.012	-0.012	0.004	-0.011	0.035	0.09	-0.005	-0.011	0.028	-0.026	-0.027	0.017	-0.01	0.013	0.009	-0.002	0.013	-0.011	-0.017	-0.005	0.011	-0.004	-0.007	0.004	0.005	-0.015	-0.016	-0.001	-0.005	0.002	0.003	-0.011	0.028	-0.001	-0.001	0.021
Anemia in neoplastic disease	hematopoietic	-0.005	-0.002	-0.01	-0.008	-0.009	0.05	0.061	-0.007	0.02	0.006	-0.021	-0.018	-0.002	-0.006	0.03	0.025	-0.005	0.017	0.002	-0.005	-0.01	0.009	-0.002	0	0.008	0	-0.003	-0.004	-0.008	0	0.021	-0.001	-0.013	0.018	-0.008	-0.008	0.027
Encounter for long-term (current) use of anticoagulants	hematopoietic	0.014	0.032	-0.01	0.028	0.024	0.049	0.116	-0.009	0.032	-0.006	-0.07	-0.064	0.007	-0.04	0.05	0.07	-0.041	0.035	0.032	0.002	-0.033	0.06	-0.015	-0.027	0.031	0.025	-0.018	-0.004	0.007	0	0.015	0.013	-0.041	0.033	0.013	-0.021	0.139
Other and unspecified coagulation defects	hematopoietic	0.006	0.035	0.017	0.025	0.027	0.045	0.113	0.003	0.035	0.004	-0.007	-0.017	0.008	-0.004	0.011	0.045	-0.003	0.032	0.027	0.001	0.001	0.03	-0.002	0	0.006	0.027	0.005	0.008	-0.005	0.027	0.004	0.011	-0.006	0.033	0.018	-0.011	0.06
Primary hypercoagulable state	hematopoietic	0.015	0.012	0.009	-0.001	0.007	0.001	0.026	-0.008	0.024	0.004	-0.005	-0.017	0.003	-0.008	-0.003	0.034	-0.012	0.001	0.023	0.019	-0.011	0.027	0.023	-0.002	-0.002	0.022	0.001	0.009	-0.001	0.024	-0.008	-0.002	-0.004	0.024	0.006	-0.009	0.022
Abnormal coagulation profile	hematopoietic	0.01	0.039	0.005	0.013	0.021	0.076	0.127	0	0.027	0.011	-0.011	-0.013	0.025	-0.002	0.048	0.06	-0.007	0.045	0.029	-0.006	-0.004	0.048	-0.01	-0.002	0.027	0.042	0.001	-0.001	0.03	0.009	0.027	0.027	-0.004	0.041	0.029	0.014	0.048
Thrombocytopenia	hematopoietic	0.013	0.027	-0.002	0.063	0.037	0.072	0.132	-0.01	0.034	-0.002	-0.035	-0.022	0.008	-0.008	0.024	0.051	-0.009	0.018	0.006	0	-0.005	0.03	-0.014	-0.004	0.029	0.023	0.008	0.002	0.006	0.005	0.05	0.032	-0.013	0.053	-0.003	-0.003	0.073
Primary thrombocytopenia	hematopoietic	0.007	0	-0.005	0.003	0.008	0.01	0.001	-0.006	0.007	0.003	0	0.005	0.011	-0.009	0.003	0.009	-0.005	0.001	-0.008	-0.008	-0.008	-0.01	-0.007	-0.006	-0.006	0.008	-0.008	-0.006	0.005	0.006	0.007	0.003	0.004	0.015	-0.006	0.005	0.021
Diseases of white blood cells	hematopoietic	-0.005	0.019	0.012	0.011	0	0.016	0.032	-0.007	0.018	0.013	-0.027	-0.018	0.002	-0.006	-0.001	0.016	-0.01	0.012	-0.004	0.009	-0.003	0.02	0.005	-0.008	0.007	0.007	-0.004	-0.014	0	0	-0.007	0.007	-0.007	0.017	0.024	-0.008	0.038
Decreased white blood cell count	hematopoietic	0.005	0.032	-0.007	0.009	-0.001	0.026	0.05	0	0.031	0.004	-0.019	-0.006	0.004	-0.008	-0.002	0.031	0.006	0.009	0	0.016	-0.004	0.023	-0.003	-0.002	0.006	0.019	0.026	0.001	-0.001	0.009	0.036	-0.002	0.001	0.006	-0.009	-0.009	0.023
Neutropenia	hematopoietic	0.006	0.021	0.001	0.002	-0.002	0.037	0.042	-0.005	0.029	-0.004	-0.021	-0.011	0.012	-0.007	-0.003	0.033	-0.004	0.011	0	-0.003	-0.006	0.026	-0.009	-0.008	0.023	0.011	0.006	0.007	0.004	-0.002	0.02	0.007	-0.012	0.006	-0.013	-0.002	0.026
Elevated white blood cell count	hematopoietic	0.021	0.061	0.039	0.047	0.05	0.086	0.161	0.009	0.075	0.032	-0.038	-0.036	0.036	-0.024	0.022	0.086	-0.007	0.051	0.014	0.023	-0.02	0.083	-0.007	-0.017	0.024	0.039	-0.003	-0.002	0.027	0.022	0.029	0.046	-0.014	0.087	0.042	-0.012	0.117
Other diseases of blood and blood-forming organs	hematopoietic	-0.002	0.016	0.019	0.037	0.039	0.024	0.028	-0.008	0.028	-0.01	-0.021	-0.021	0.006	-0.009	-0.003	0.02	-0.017	0	0.004	0.001	-0.011	0.011	-0.011	-0.01	-0.01	0.016	0	0.014	0.005	0.017	0.024	0.024	-0.014	0.018	-0.002	-0.009	0.045
Lymphadenitis	hematopoietic	0.027	0.045	0.022	0.015	0.011	0.044	0.043	-0.005	0.065	0.02	-0.005	-0.014	0.025	0	0.001	0.07	0.005	0.041	0.009	0.02	0.003	0.054	0.019	-0.006	-0.001	0.024	0.002	0.034	0.025	0.017	0.025	0.023	-0.01	0.032	0.023	0.018	0.073
Polycythemia, secondary	hematopoietic	0.007	0.003	0.001	0.016	0.008	0.001	0.026	0.006	0.02	0.022	-0.006	-0.009	0.012	-0.009	0.003	0.017	-0.005	0.001	0.008	0.007	-0.008	0.014	-0.007	-0.006	-0.006	0.013	-0.008	-0.005	-0.006	0.006	-0.005	0.004	-0.01	0.015	0.004	-0.006	0.038
Dementias	mental disorders	0.018	0.011	0.012	-0.004	0.01	0.089	0.151	0.01	0.031	0.035	-0.016	-0.015	0.024	-0.012	1	0.038	0.004	0.009	0.002	0.023	-0.003	0.041	-0.009	-0.001	0.295	0.027	-0.004	-0.003	0.016	0.011	0.057	0.037	-0.007	0.005	0.008	-0.008	0.006
Delirium due to conditions classified elsewhere	mental disorders	-0.003	0.05	0.004	0.106	0.108	0.187	0.284	0.047	0.076	0.045	-0.019	-0.015	0.034	-0.01	0.074	0.075	0.026	0.057	0.006	0.026	-0.008	0.072	0.001	-0.007	0.039	0.095	-0.001	0	0.042	0.031	0.114	0.02	0.008	0.095	0.078	0.003	0.071
Other persistent mental disorders due to conditions classified elsewhere	mental disorders	0.034	0.075	0.039	0.027	0.036	0.122	0.114	0.051	0.083	0.072	0.023	0.004	0.067	0.018	0.19	0.108	0.008	0.065	0.019	0.061	0.007	0.105	-0.001	0.019	0.214	0.09	0.021	0.017	0.089	0.054	0.13	0.087	0.027	0.039	0.013	0.014	0.032
Specific nonpsychotic mental disorders due to brain damage	mental disorders	0.025	0.045	0.032	0.007	0.045	0.051	0.075	0.011	0.058	0.029	0.044	-0.007	0.03	0.022	0.069	0.068	0.023	0.017	0.009	0.042	0.025	0.05	0.006	-0.008	0.127	0.049	0.003	0.016	0.042	0.047	0.049	0.054	0.025	0.04	0.041	0.009	0.016
Alteration of consciousness	mental disorders	0.018	0.05	0.034	0.053	0.046	1	0.231	0.046	0.05	0.054	-0.006	-0.002	0.047	0.005	0.089	0.078	0.027	0.035	0.015	0.027	0.006	0.063	0.008	-0.01	0.037	0.063	0.011	0.022	0.055	0.056	0.08	0.089	0.004	0.079	0.074	0.012	0.059
Neurological disorders	mental disorders	0.009	0.042	0.037	0.003	0.02	0.055	0.081	0.016	0.056	0.044	0.063	0.047	0.023	0.038	0.156	0.046	0.047	0.029	0.017	0.047	0.026	0.05	-0.004	0.02	0.147	0.08	0.024	0.031	0.028	0.034	0.068	0.039	0.072	0.001	0.013	0.058	0.003
Aphasia/speech disturbance	mental disorders	0.005	0.018	0.025	0.01	0.024	0.072	0.127	0.057	0.048	0.056	0.11	0.146	0.04	0.12	0.083	0.023	0.2	0.025	0.035	0.035	0.083	0.034	-0.015	0.113	0.061	0.062	0.034	0.054	0.045	0.033	0.065	0.016	0.259	0.011	0.033	0.086	-0.002
Aphasia	mental disorders	0.003	0.006	0.012	0.021	0.025	0.043	0.117	-0.007	0.038	0	-0.006	-0.012	-0.009	-0.011	0.052	0.032	0.028	0.014	-0.01	0.003	-0.001	0.02	-0.008	0.001	0.054	0.012	0.005	0.009	0.002	0.009	0.025	0.001	0.018	0.023	-0.007	0.011	0.028
Mild cognitive impairment	mental disorders	0.013	0.018	0.027	0.002	0.016	0.037	0.09	0.002	0.032	0.037	-0.007	-0.014	0.026	-0.012	0.295	0.055	-0.01	0.014	-0.004	0.022	-0.003	0.058	-0.009	0	1	0.024	-0.003	0.01	0.009	0.012	0.021	0.039	-0.002	0.01	0	0	0.015
Memory loss	mental disorders	-0.002	0.056	0.027	0.031	0.016	0.082	0.117	0.006	0.073	0.032	-0.009	-0.032	0.056	-0.016	0.246	0.122	-0.017	0.05	0.004	0.038	-0.007	0.111	-0.013	-0.016	0.275	0.071	0.006	0.003	0.03	0.041	0.057	0.08	-0.001	0.032	0.033	0.003	0.035
Altered mental status	mental disorders	0.01	0.053	0.022	0.094	0.111	0.231	1	0.053	0.084	0.039	-0.011	-0.01	0.065	-0.006	0.151	0.105	0.051	0.044	0.024	0.037	0	0.101	-0.015	-0.004	0.09	0.107	-0.001	0	0.056	0.068	0.128	0.055	0.008	0.132	0.064	-0.009	0.116
Symptoms involving head and neck	mental disorders	0.032	0.024	0	-0.013	-0.004	0.004	-0.004	0.002	0.004	0.014	0.016	0.017	-0.015	0.035	-0.008	0.035	0.015	0.018	0.016	-0.001	-0.003	0.045	-0.001	0.016	0.008	0.017	-0.01	0.022	-0.008	-0.005	-0.007	0.031	0.015	0.015	-0.008	0.001	0.001
Swelling, mass, or lump in head and neck [Space-occupying lesion, intracranial NOS]	mental disorders	0.022	0.036	0.029	0.023	0.026	0.015	0.035	0.009	0.047	0.006	-0.001	-0.018	0.017	0.006	0.003	0.074	-0.002	0.038	0.025	0.02	-0.001	0.067	-0.007	-0.004	0.017	0.03	0.001	0.017	0.036	0.029	0.02	0.036	-0.002	0.028	0.014	-0.007	0.07
Psychosis	mental disorders	0.027	0.052	0.032	0.043	0.029	0.08	0.128	0.091	0.049	0.064	0.026	0.003	0.11	0.038	0.057	0.092	0.038	0.073	0.044	0.048	0.008	0.089	0.01	0.012	0.021	0.117	0.023	0.026	0.132	0.081	1	0.049	0.009	0.068	0.08	0.023	0.041
Mood disorders	mental disorders	0.031	0.107	0.088	0.116	0.116	0.063	0.107	0.164	0.157	0.11	0.108	0.038	0.276	0.123	0.027	0.18	0.066	0.111	0.074	0.128	0.026	0.207	0.031	0.033	0.024	1	0.079	0.072	0.126	0.191	0.117	0.08	0.044	0.17	0.202	0.04	0.08
Bipolar	mental disorders	0.028	0.088	0.105	0.105	0.098	0.047	0.065	0.168	0.133	0.1	0.093	0.017	1	0.089	0.024	0.156	0.03	0.072	0.068	0.124	0.021	0.164	0.079	0.031	0.026	0.276	0.069	0.043	0.195	0.192	0.11	0.073	0.017	0.158	0.157	0	0.09
Depression	mental disorders	0.111	0.275	0.165	0.142	0.141	0.078	0.105	0.078	0.318	0.112	0.008	-0.067	0.156	-0.009	0.038	1	-0.033	0.283	0.104	0.21	-0.028	0.551	0.075	-0.023	0.055	0.18	0.059	0.052	0.152	0.149	0.092	0.112	-0.041	0.182	0.139	-0.019	0.167
Major depressive disorder	mental disorders	0.1	0.28	0.196	0.161	0.152	0.063	0.101	0.093	0.324	0.112	0.022	-0.058	0.164	-0.004	0.041	0.551	-0.028	0.268	0.115	0.286	-0.017	1	0.129	-0.02	0.058	0.207	0.083	0.071	0.167	0.191	0.089	0.125	-0.032	0.188	0.163	-0.018	0.166
Suicidal ideation	mental disorders	0.033	0.079	0.105	0.148	0.178	0.074	0.064	0.228	0.1	0.147	0.061	0.01	0.157	0.047	0.008	0.139	0.034	0.111	0.062	0.094	0.019	0.163	-0.001	0.017	0	0.202	0.052	0.058	0.208	0.236	0.08	0.072	0.01	0.186	1	0.001	0.059
Anxiety disorders	mental disorders	0.034	0.071	0.068	0.086	0.102	0.054	0.039	0.2	0.08	1	0.029	0.042	0.1	0.058	0.035	0.112	0.052	0.088	0.079	0.078	0.016	0.112	0.039	0.06	0.037	0.11	0.034	0.036	0.175	0.083	0.064	0.043	0.033	0.101	0.147	0.015	0.018
Anxiety disorder	mental disorders	0.104	0.22	0.22	0.098	0.103	0.05	0.084	0.101	1	0.08	0.078	0.049	0.133	0.053	0.031	0.318	0.051	0.185	0.077	0.371	0.044	0.324	0.116	0.037	0.032	0.157	0.116	0.075	0.123	0.139	0.049	0.109	0.053	0.16	0.1	0.053	0.142
Generalized anxiety disorder	mental disorders	0.068	0.185	0.239	0.072	0.091	0.027	0.037	0.091	0.371	0.078	0.113	0.054	0.124	0.058	0.023	0.21	0.067	0.138	0.1	1	0.051	0.286	0.056	0.025	0.022	0.128	0.132	0.072	0.11	0.136	0.048	0.077	0.051	0.114	0.094	0.055	0.069
Agorophobia, social phobia, and panic disorder	mental disorders	0.065	0.107	1	0.1	0.07	0.034	0.022	0.083	0.22	0.068	0.014	-0.003	0.105	0.003	0.012	0.165	0.011	0.11	0.034	0.239	0.003	0.196	0.031	-0.01	0.027	0.088	0.11	0.041	0.113	0.134	0.032	0.054	-0.006	0.119	0.105	0.01	0.071
Obsessive-compulsive disorders	mental disorders	0.022	0.031	0.11	0.014	0.012	0.011	-0.001	0.083	0.116	0.034	0.098	0.121	0.069	0.086	-0.004	0.059	0.077	0.034	0.062	0.132	0.046	0.083	0.026	0.078	-0.003	0.079	1	0.028	0.047	0.075	0.023	0.016	0.075	0.045	0.052	0.116	-0.005
Dysthymic disorder	mental disorders	0.077	0.179	0.11	0.09	0.091	0.035	0.044	0.083	0.185	0.088	-0.001	-0.025	0.072	-0.014	0.009	0.283	-0.003	1	0.087	0.138	-0.01	0.268	0.01	-0.009	0.014	0.111	0.034	0.055	0.172	0.102	0.073	0.074	-0.013	0.089	0.111	0	0.051
Acute reaction to stress	mental disorders	1	0.158	0.065	0.036	0.041	0.018	0.01	0.032	0.104	0.034	-0.016	-0.024	0.028	-0.011	0.018	0.111	-0.012	0.077	0.025	0.068	-0.008	0.1	0.005	0.001	0.013	0.031	0.022	0.016	0.053	0.078	0.027	0.048	-0.012	0.024	0.033	-0.011	0.027
Posttraumatic stress disorder	mental disorders	0.078	0.118	0.134	0.123	0.119	0.056	0.068	0.232	0.139	0.083	0.05	-0.019	0.192	0.03	0.011	0.149	0.015	0.102	0.084	0.136	0.002	0.191	0.015	0.013	0.012	0.191	0.075	0.044	0.175	1	0.081	0.11	-0.005	0.151	0.236	-0.005	0.07
Personality disorders	mental disorders	0.053	0.119	0.113	0.131	0.142	0.055	0.056	0.234	0.123	0.175	0.021	0.011	0.195	0.019	0.016	0.152	0.031	0.172	0.091	0.11	0.012	0.167	0.03	0.001	0.009	0.126	0.047	0.052	1	0.175	0.132	0.107	0.022	0.142	0.208	0.001	0.045
Antisocial/borderline personality disorder	mental disorders	0.032	0.063	0.083	0.098	0.101	0.046	0.053	1	0.101	0.2	0.08	0.115	0.168	0.147	0.01	0.078	0.09	0.083	0.122	0.091	0.023	0.093	0.043	0.123	0.002	0.164	0.083	0.075	0.234	0.232	0.091	0.011	0.101	0.118	0.228	0.031	0.029
Decreased libido	mental disorders	0.023	0.051	0.011	0.034	0.028	0.022	0.017	-0.008	0.03	0.013	-0.017	-0.019	0.002	-0.012	-0.001	0.069	-0.006	0.037	0.026	0.016	-0.01	0.058	0.005	-0.009	-0.001	0.014	-0.004	0.011	0.016	-0.001	0.02	0.014	-0.013	0.037	-0.001	0	0.014
Somatoform disorder	mental disorders	0.048	0.102	0.054	0.046	0.034	0.089	0.055	0.011	0.109	0.043	-0.008	-0.007	0.073	0.005	0.037	0.112	-0.001	0.074	0.027	0.077	-0.003	0.125	0.012	0.008	0.039	0.08	0.016	0.024	0.107	0.11	0.049	1	-0.013	0.097	0.072	0.008	0.04
Adjustment reaction	mental disorders	0.158	1	0.107	0.092	0.085	0.05	0.053	0.063	0.22	0.071	-0.002	-0.046	0.088	0.002	0.011	0.275	-0.021	0.179	0.075	0.185	-0.015	0.28	0.074	-0.011	0.018	0.107	0.031	0.072	0.119	0.118	0.052	0.102	-0.02	0.092	0.079	-0.007	0.095
Eating disorder	mental disorders	0.025	0.075	0.034	0.024	0.042	0.015	0.024	0.122	0.077	0.079	0.034	0.029	0.068	0.017	0.002	0.104	0.046	0.087	1	0.1	0.021	0.115	0.03	0.028	-0.004	0.074	0.062	0.07	0.091	0.084	0.044	0.027	0.049	0.045	0.062	0.01	0.024
Other mental disorder	mental disorders	0.016	0.072	0.041	0.04	0.029	0.022	0	0.075	0.075	0.036	0.18	0.157	0.043	0.127	-0.003	0.052	0.132	0.055	0.07	0.072	0.096	0.071	0.016	0.05	0.01	0.072	0.028	1	0.052	0.044	0.026	0.024	0.114	0.016	0.058	0.077	0.019
Mental disorders durring/after pregnancy	mental disorders	0.005	0.074	0.031	0.018	0.008	0.008	-0.015	0.043	0.116	0.039	0.009	-0.02	0.079	0.014	-0.009	0.075	-0.007	0.01	0.03	0.056	-0.004	0.129	1	-0.001	-0.009	0.031	0.026	0.016	0.03	0.015	0.01	0.012	-0.014	0.081	-0.001	-0.001	0.075
Tension headache	mental disorders	0.079	0.074	0.041	0.014	0.009	0.021	0.016	0.001	0.063	0.012	-0.007	-0.019	0.018	-0.012	0.013	0.071	-0.011	0.033	-0.005	0.063	-0.01	0.082	0.032	-0.009	-0.009	0.021	0.014	0.018	0.015	0.049	0.028	0.065	-0.013	0.035	0.022	-0.001	0.019
Conduct disorders	mental disorders	-0.011	0.002	0.003	-0.008	-0.009	0.005	-0.006	0.147	0.053	0.058	0.349	0.264	0.089	1	-0.012	-0.009	0.193	-0.014	0.017	0.058	0.183	-0.004	0.014	0.133	-0.012	0.123	0.086	0.127	0.019	0.03	0.038	0.005	0.253	0.011	0.047	0.145	-0.035
Attention deficit hyperactivity disorder	mental disorders	-0.016	-0.002	0.014	-0.014	0.004	-0.006	-0.011	0.08	0.078	0.029	1	0.272	0.093	0.349	-0.016	0.008	0.302	-0.001	0.034	0.113	0.305	0.022	0.009	0.14	-0.007	0.108	0.098	0.18	0.021	0.05	0.026	-0.008	0.239	0.03	0.061	0.197	-0.073
Tics and stuttering	mental disorders	-0.011	-0.007	0.01	-0.007	-0.013	0.012	-0.009	0.031	0.053	0.015	0.197	0.218	0	0.145	-0.008	-0.019	0.209	0	0.01	0.055	0.128	-0.018	-0.001	0.111	0	0.04	0.116	0.077	0.001	-0.005	0.023	0.008	0.158	-0.011	0.001	1	-0.037
Autism	mental disorders	-0.024	-0.046	-0.003	-0.029	-0.027	-0.002	-0.01	0.115	0.049	0.042	0.272	1	0.017	0.264	-0.015	-0.067	0.439	-0.025	0.029	0.054	0.189	-0.058	-0.02	0.264	-0.014	0.038	0.121	0.157	0.011	-0.019	0.003	-0.007	0.39	-0.032	0.01	0.218	-0.092
Develomental delays and disorders	mental disorders	-0.012	-0.021	0.011	0.004	0	0.027	0.051	0.09	0.051	0.052	0.302	0.439	0.03	0.193	0.004	-0.033	1	-0.003	0.046	0.067	0.32	-0.028	-0.007	0.296	-0.01	0.066	0.077	0.132	0.031	0.015	0.038	-0.001	0.444	0.006	0.034	0.209	-0.057
Learning disorder	mental disorders	-0.008	-0.015	0.003	-0.011	-0.008	0.006	0	0.023	0.044	0.016	0.305	0.189	0.021	0.183	-0.003	-0.028	0.32	-0.01	0.021	0.051	1	-0.017	-0.004	0.164	-0.003	0.026	0.046	0.096	0.012	0.002	0.008	-0.003	0.241	-0.018	0.019	0.128	-0.047
Speech and language disorder	mental disorders	-0.012	-0.02	-0.006	-0.02	-0.017	0.004	0.008	0.101	0.053	0.033	0.239	0.39	0.017	0.253	-0.007	-0.041	0.444	-0.013	0.049	0.051	0.241	-0.032	-0.014	0.217	-0.002	0.044	0.075	0.114	0.022	-0.005	0.009	-0.013	1	-0.024	0.01	0.158	-0.055
Mental retardation	mental disorders	0.001	-0.011	-0.01	-0.008	-0.009	-0.01	-0.004	0.123	0.037	0.06	0.14	0.264	0.031	0.133	-0.001	-0.023	0.296	-0.009	0.028	0.025	0.164	-0.02	-0.001	1	0	0.033	0.078	0.05	0.001	0.013	0.012	0.008	0.217	-0.016	0.017	0.111	-0.035
Substance addiction and disorders	mental disorders	0.024	0.092	0.119	0.291	0.255	0.079	0.132	0.118	0.16	0.101	0.03	-0.032	0.158	0.011	0.005	0.182	0.006	0.089	0.045	0.114	-0.018	0.188	0.081	-0.016	0.01	0.17	0.045	0.016	0.142	0.151	0.068	0.097	-0.024	1	0.186	-0.011	0.19
Polyneuropathy due to drugs	mental disorders	0.024	0.029	0.002	0.016	0.009	-0.001	0.024	-0.007	0.016	0.009	-0.018	-0.016	0.006	-0.011	0.018	0.014	-0.013	0.01	-0.002	0.007	-0.009	0.025	-0.008	-0.007	0.01	0.003	-0.009	-0.007	0.002	-0.01	0.025	0.001	-0.011	0.009	0.002	-0.007	0.015
Alcohol-related disorders	mental disorders	0.036	0.092	0.1	1	0.569	0.053	0.094	0.098	0.098	0.086	-0.014	-0.029	0.105	-0.008	-0.004	0.142	0.004	0.09	0.024	0.072	-0.011	0.161	0.018	-0.008	0.002	0.116	0.014	0.04	0.131	0.123	0.043	0.046	-0.02	0.291	0.148	-0.007	0.139
Alcoholism	mental disorders	0.041	0.085	0.07	0.569	1	0.046	0.111	0.101	0.103	0.102	0.004	-0.027	0.098	-0.009	0.01	0.141	0	0.091	0.042	0.091	-0.008	0.152	0.008	-0.009	0.016	0.116	0.012	0.029	0.142	0.119	0.029	0.034	-0.017	0.255	0.178	-0.013	0.143
Tobacco use disorder	mental disorders	0.027	0.095	0.071	0.139	0.143	0.059	0.116	0.029	0.142	0.018	-0.073	-0.092	0.09	-0.035	0.006	0.167	-0.057	0.051	0.024	0.069	-0.047	0.166	0.075	-0.035	0.015	0.08	-0.005	0.019	0.045	0.07	0.041	0.04	-0.055	0.19	0.059	-0.037	1
Other CNS infection and poliomyelitis	neurological	-0.003	0.012	0.014	0.024	0.011	0.038	0.026	0.026	0.033	-0.008	0.003	0.007	0.024	-0.003	-0.007	0.024	0.009	-0.002	0.006	0.006	0	0.02	0.026	0.002	-0.007	0.005	-0.001	-0.002	0.022	0.011	0.016	0.011	-0.004	0.046	0.031	0.032	0.015
Sleep disorders	neurological	0.041	0.103	0.047	0.031	0.01	0.039	0.029	0.072	0.131	0.059	0.112	0.105	0.063	0.114	-0.001	0.123	0.114	0.098	0.051	0.104	0.058	0.125	0.004	0.041	0.011	0.094	0.035	0.104	0.065	0.054	0.039	0.049	0.095	0.051	0.036	0.067	0.05
Hypersomnia	neurological	0.047	0.068	0.037	0.011	0.004	0.044	0.024	0.026	0.095	0.031	0.01	-0.01	0.067	-0.006	0	0.107	0.013	0.078	0.063	0.059	0	0.106	0.007	0.001	0.02	0.056	0.023	0.033	0.073	0.055	0.051	0.047	-0.001	0.03	0.036	0.012	0.04
Sleep apnea	neurological	0.042	0.098	0.032	0.049	0.035	0.051	0.062	0.016	0.084	0.031	-0.014	-0.032	0.053	-0.003	0.016	0.187	0.006	0.101	0.075	0.034	0.002	0.152	-0.021	-0.01	0.038	0.052	0.007	0.032	0.057	0.033	0.034	0.041	-0.001	0.046	0.022	-0.003	0.1
Central/nonobstroctive sleep apnea	neurological	0.008	0.033	0.007	0.041	0.035	0.024	0.065	0.015	0.027	0.009	-0.016	-0.014	0.014	-0.004	0.017	0.065	0.004	0.04	0.038	0.029	0.007	0.062	-0.004	0.026	0.025	0.048	-0.006	0.011	0.02	0.007	0.016	0.011	0	0.037	-0.009	-0.002	0.079
Obstructive sleep apnea	neurological	0.029	0.084	0.03	0.051	0.047	0.056	0.072	0.03	0.081	0.04	-0.022	-0.034	0.044	-0.007	0.002	0.183	-0.001	0.095	0.068	0.043	-0.006	0.166	-0.024	0.004	0.046	0.061	-0.007	0.038	0.042	0.024	0.028	0.032	-0.005	0.042	0.025	-0.006	0.126
Insomnia	neurological	0.077	0.169	0.07	0.07	0.07	0.057	0.085	0.039	0.213	0.076	-0.011	-0.038	0.075	-0.005	0.025	0.22	-0.016	0.139	0.053	0.17	-0.02	0.225	-0.003	-0.019	0.03	0.075	0.022	0.029	0.089	0.063	0.054	0.103	-0.019	0.116	0.052	-0.002	0.105
Organic or persistent insomnia	neurological	0.037	0.05	0.027	0.002	0.016	0.018	0.014	0.033	0.07	0.041	0.007	0	0.043	0.024	0.007	0.09	0.014	0.034	0.016	0.058	-0.002	0.076	-0.006	-0.005	0.02	0.038	0.002	-0.005	0.022	0.03	0.005	0.013	0.025	0.058	0.027	0.009	0.038
Parasomnia	neurological	0.022	0.048	0.046	0.015	0.003	0.027	0.017	0.013	0.057	0.041	0.014	0.012	0.025	0.008	0.017	0.054	0.027	0.08	0.004	0.055	0.013	0.059	-0.008	0.01	0.001	0.024	0.027	0.025	0.038	0.034	-0.007	0.043	0.012	0.017	0.019	0.02	0.01
Sleep related movement disorders	neurological	0.003	0.028	0.028	0.007	0.006	0.018	-0.004	0.024	0.042	0.036	0.013	0.013	0.003	0.017	-0.01	0.047	0.025	0.051	0.022	0.035	0.007	0.046	-0.01	-0.002	-0.003	0.031	0.024	0.016	0.028	0.008	0.017	0.011	0.019	0.016	0.019	0.042	0.017
Restless legs syndrome	neurological	0.068	0.078	0.038	0.025	0.021	0.039	0.037	0.018	0.083	0.041	-0.017	-0.03	0.019	-0.015	0.007	0.136	-0.012	0.087	0.028	0.065	-0.016	0.134	-0.014	-0.016	0.02	0.036	0.001	0.006	0.057	0.019	0.044	0.043	-0.017	0.049	0.034	0.001	0.073
Parkinson's disease	neurological	0.015	0.001	0.001	0.014	0.018	0.019	0.055	0.003	0.031	0.023	-0.022	-0.017	0.023	-0.011	0.114	0.028	-0.009	0.028	0.003	0.022	-0.009	0.028	-0.009	0.001	0.075	0.018	0.011	-0.006	0.01	0.007	0.052	0.008	-0.006	0.02	0.009	-0.008	0.011
Extrapyramidal disease and abnormal movement disorders	neurological	0.045	0.056	0.028	0.029	0.027	0.021	0.043	0.035	0.054	0.062	-0.005	-0.008	0.035	0.004	0.02	0.095	0.003	0.077	0.067	0.028	-0.01	0.081	-0.01	-0.009	0.029	0.056	0.027	0.018	0.071	0.027	0.082	0.065	-0.013	0.04	0.053	0.007	0.032
Essential tremor	neurological	0.038	0.031	0.041	0.045	0.039	0.036	0.071	0.01	0.07	0.027	-0.002	0.001	0.036	-0.003	0.051	0.074	0.001	0.036	0.009	0.053	0.002	0.07	-0.007	-0.005	0.053	0.025	0.011	0.008	0.038	0.01	0.039	0.034	-0.005	0.013	0.019	-0.011	0.036
Degenerative disease of the spinal cord	neurological	-0.004	0.016	0.005	-0.002	0.002	0.018	0.03	0.002	0.03	0.015	-0.003	-0.006	0.009	0.001	-0.008	0.027	0.02	0.019	0.01	0.006	0.005	0.017	-0.001	0.009	0	0.018	-0.01	0.005	0.01	0.013	0.003	0.04	-0.001	0.029	0.026	0.018	0.024
Multiple sclerosis	neurological	-0.005	0.019	0.004	0.002	0.001	0.004	0.038	-0.007	0.023	-0.001	-0.02	-0.018	0.003	-0.012	-0.008	0.023	0	0.022	0.002	0.014	-0.01	0.023	-0.009	-0.008	0	0.025	-0.003	0.013	0.018	0.018	0.003	0.007	-0.007	0.006	0.025	0.001	0.015
Disorders of the autonomic nervous system	neurological	-0.01	0.023	0.018	0.005	-0.001	0.021	0.024	-0.007	0.016	0.009	0.037	0.013	0.001	0.015	0.018	0.026	-0.002	0.019	-0.002	0.007	-0.001	0.03	-0.008	-0.007	0.001	0.012	0.013	0.023	0.021	0.009	0.025	0.07	-0.005	0.009	-0.007	0.021	0
Peripheral autonomic neuropathy	neurological	0.015	0.042	0.001	0.042	0.046	0.036	0.08	0.006	0.025	-0.007	-0.013	-0.014	0	-0.009	0.023	0.027	-0.005	0.026	0.017	0	-0.008	0.043	-0.007	-0.006	0.004	0.008	-0.008	0.003	0.026	0.014	0.043	0.054	0.011	0.015	0.004	0.005	0.053
Acute pain	neurological	0.033	0.076	0.029	0.067	0.068	0.059	0.127	0.022	0.078	0.031	-0.045	-0.042	0.023	-0.028	-0.005	0.122	-0.018	0.068	0.041	0.027	-0.024	0.109	-0.003	-0.015	0.016	0.047	-0.001	0.017	0.071	0.041	0.041	0.066	-0.019	0.106	0.038	-0.008	0.124
Chronic pain	neurological	0.046	0.148	0.076	0.085	0.082	0.073	0.129	0.043	0.182	0.043	-0.014	-0.049	0.087	-0.011	0.04	0.172	-0.023	0.083	0.025	0.11	-0.022	0.202	0.027	-0.01	0.015	0.09	0.017	0.033	0.068	0.117	0.032	0.144	-0.02	0.194	0.077	-0.012	0.153
Other headache syndromes	neurological	0.08	0.173	0.095	0.065	0.062	0.077	0.079	0.05	0.19	0.064	0.018	-0.048	0.09	0.009	0.009	0.21	-0.021	0.118	0.063	0.119	0	0.205	0.078	-0.006	0.032	0.097	0.016	0.05	0.075	0.1	0.052	0.107	-0.021	0.104	0.076	-0.001	0.094
Migraine	neurological	0.05	0.128	0.082	0.021	0.019	0.027	0.022	0.037	0.136	0.034	0.047	-0.022	0.075	0.019	-0.011	0.142	-0.004	0.076	0.057	0.123	-0.003	0.147	0.073	-0.005	0.002	0.07	0.031	0.036	0.053	0.091	0.021	0.096	-0.013	0.074	0.05	0.012	0.014
Migrain with aura	neurological	0.002	0.052	0.031	-0.009	-0.003	-0.003	0.011	0.013	0.055	-0.003	0.014	-0.027	0.01	-0.007	-0.013	0.052	-0.017	0.009	0.03	0.07	-0.002	0.05	0.03	-0.009	-0.001	0.026	0.01	0.02	0.014	0.033	0	0.03	-0.004	0.019	0.008	-0.012	0.004
Hemiplegia	neurological	0.017	0.014	0.007	0.019	0.023	0.047	0.106	-0.008	0.027	0.005	0.016	-0.001	0.006	-0.002	0.028	0.027	0.021	0.007	0.001	-0.001	0.035	0.03	-0.01	0.022	0.044	0.033	0.002	0.019	0.008	0.01	0.019	0.028	0.007	0.032	0.022	0.015	0.039
Epilepsy, recurrent seizures, convulsions	neurological	-0.002	0.019	0.031	0.028	0.048	0.085	0.103	0.071	0.034	0.03	0.057	0.063	0.035	0.026	0.037	0.033	0.093	0.01	0.021	0.038	0.078	0.026	0.024	0.123	0.023	0.051	0.019	0.009	0.031	0.058	0.019	0.058	0.082	0.069	0.056	0.025	0.018
Epilepsy	neurological	-0.005	0.004	0.003	0.016	0.034	0.069	0.091	0.046	0.034	0.013	0.068	0.048	0.011	0.043	0.037	0.023	0.091	-0.003	0.002	0.025	0.063	0.023	0.005	0.125	0.022	0.043	0.022	0.01	0.024	0.051	0.048	0.045	0.071	0.05	0.031	0	0.004
Generalized convulsive epilepsy	neurological	-0.005	0.001	0.009	0.022	0.04	0.024	0.061	0.038	0.02	0.006	0.071	0.047	0.017	0.034	0.007	0.002	0.094	-0.01	0.002	0.027	0.059	0.015	0.013	0.121	0	0.045	0.003	0.012	0.009	0.053	0.021	0.031	0.063	0.04	0.025	0	-0.012
Partial epilepsy	neurological	0.003	0	0.005	0.012	0.026	0.037	0.051	0.038	0.018	0.028	0.077	0.067	0.014	0.031	0.029	0.006	0.093	-0.006	0.014	0.016	0.1	0.013	-0.007	0.146	0.019	0.03	0.026	0.016	0.002	0.011	0.047	0.041	0.088	0.039	0.032	0.021	-0.003
Convulsions	neurological	0.009	0.053	0.042	0.045	0.066	0.147	0.153	0.076	0.079	0.053	0.083	0.094	0.061	0.049	0.045	0.077	0.125	0.047	0.043	0.057	0.078	0.075	0.021	0.103	0.034	0.081	0.033	0.045	0.063	0.077	0.101	0.102	0.093	0.097	0.083	0.055	0.042
Nonspecific abnormal findings on radiological and other examination of skull and head	neurological	0.017	0.02	0.016	0.001	0	0.035	0.071	-0.008	0.027	0.02	0.004	0.003	0.028	-0.007	0.043	0.036	0.017	0.034	-0.005	0.021	0.01	0.05	-0.002	-0.009	0.075	0.022	0.009	-0.006	0.024	0.011	0.02	0.044	0.023	0.016	0.007	0.008	0.031
Cerebral edema and compression of brain	neurological	0.019	0.013	-0.005	0.007	0.021	0.037	0.081	0.002	0.016	0.006	0.023	0.016	-0.001	0.005	0.007	0.009	0.028	-0.006	0.002	0.025	-0.01	0.024	0.006	0.008	0.016	0.012	-0.003	-0.004	0.001	0	0.021	0.007	0.031	0.027	0.008	0.017	0.003
Encephalopathy, not elsewhere classified	neurological	0.002	0.019	0.01	0.022	0.017	0.133	0.265	0.07	0.061	0.026	0.084	0.13	0.038	0.092	0.078	0.03	0.151	0.021	0.009	0.037	0.066	0.04	-0.013	0.135	0.046	0.057	0.044	0.031	0.044	0.014	0.066	0.011	0.128	0.04	0.018	0.05	0.03
Other conditions of brain, NOS	neurological	0.026	0.033	-0.007	0.033	0.031	0.103	0.163	0.013	0.047	0.014	0.001	-0.013	0.029	-0.01	0.072	0.035	0.009	0.007	-0.008	-0.009	-0.006	0.041	-0.005	0.003	0.048	0.029	-0.002	0.007	0.052	0.053	0.06	0.047	0.015	0.06	0.01	-0.003	0.037
Other and unspecified disorders of the nervous system	neurological	0.022	0.034	0.006	0.009	0.014	0.052	0.12	0.006	0.045	0.012	0	-0.009	0.022	-0.009	0.042	0.033	0.013	0.05	0.024	0.013	0.001	0.028	-0.007	0.014	0.054	0.018	0.009	0.011	0.026	0.013	0.054	0.053	0.017	0.063	0.035	-0.006	0.025
Abnormal involuntary movements	neurological	0.018	0.062	0.035	0.038	0.046	0.043	0.098	0.026	0.104	0.028	0.009	0.02	0.052	0.009	0.043	0.092	0.039	0.034	0.018	0.052	0.023	0.082	-0.001	0.033	0.053	0.081	0.031	0.02	0.049	0.051	0.048	0.064	0.026	0.053	0.055	0.03	0.065
Abnormality of gait	neurological	0.046	0.07	0.025	0.047	0.028	0.104	0.147	0.02	0.084	0.016	-0.006	0.018	0.027	-0.002	0.099	0.115	0.058	0.058	0.005	0.039	0.013	0.107	-0.018	0.054	0.123	0.067	0.006	0.023	0.039	0.032	0.042	0.074	0.05	0.049	0.034	0.005	0.082
Lack of coordination	neurological	-0.011	0.013	0.001	0.015	0.01	0.029	0.046	0.038	0.047	0.013	0.128	0.182	0.036	0.114	0.029	0.012	0.25	0.016	0.002	0.021	0.119	0.005	-0.01	0.13	0.065	0.038	0.028	0.053	0.038	0.006	0.017	0.039	0.227	0.018	0.007	0.11	-0.017
Disturbances of sensation of smell and taste	neurological	-0.009	0.016	-0.006	0.008	0.001	-0.008	0.023	0.017	0.006	-0.007	-0.001	-0.01	-0.007	-0.01	0.003	0.027	-0.012	0.01	0.007	0.005	-0.008	0.02	-0.007	-0.007	0.013	0.012	0	0.006	0.014	0.012	0.017	0.012	-0.01	0.003	0.003	-0.006	0.013
Other peripheral nerve disorders	neurological	0.076	0.123	0.059	0.053	0.04	0.048	0.061	0.017	0.105	0.037	-0.059	-0.068	0.036	-0.042	0.012	0.183	-0.048	0.097	0.051	0.071	-0.035	0.158	-0.018	-0.031	0.025	0.053	-0.001	0.033	0.056	0.043	0.036	0.089	-0.039	0.077	0.023	-0.029	0.12
Trigeminal nerve disorders [CN5]	neurological	-0.005	0.026	0.023	-0.003	-0.009	0.051	0.005	0.002	0.03	0.022	-0.021	-0.018	0.008	-0.006	0.015	0.038	-0.014	0.037	0.002	0.007	-0.01	0.053	-0.009	-0.008	0.032	0.021	-0.003	-0.006	0.026	0.024	0.003	0.039	-0.012	0.031	0.025	-0.008	0.034
Facial nerve disorders [CN7]	neurological	0.008	0.052	0.005	0.003	0.007	0.061	0.026	0.012	0.022	0.007	0.006	-0.017	0.028	-0.011	0.008	0.03	0.001	0.032	0.01	0.018	-0.009	0.044	-0.009	-0.008	0.025	0.018	0.004	0.003	0.045	0.026	0.013	0.024	-0.001	0.02	0.001	0.001	0.026
Nerve plexus lesions	neurological	0.021	0.054	0.029	0.008	0.014	0.009	0	-0.006	0.029	0.002	-0.007	-0.014	-0.006	-0.009	0.003	0.043	-0.011	0.03	0.008	0.016	-0.008	0.049	-0.007	-0.007	0.003	-0.003	0.009	0.002	0.015	-0.002	0.03	0.032	-0.01	0.014	0.004	-0.006	0.017
Complex regional/central pain syndrome	neurological	0.006	0.036	0.027	0.007	0.012	0.049	0.051	0.027	0.04	0.029	0.015	-0.001	0.004	-0.003	-0.007	0.047	0.011	0.037	0.015	0.011	-0.008	0.046	0.001	-0.007	0.012	0.036	-0.008	0.011	0.044	0.033	0.051	0.126	-0.004	0.054	0.023	-0.007	0.021
Chronic pain syndrome	neurological	0.045	0.089	0.079	0.057	0.051	0.073	0.085	0.049	0.119	0.031	-0.012	-0.023	0.047	-0.004	0.005	0.115	-0.007	0.097	0.063	0.074	-0.004	0.141	0.008	-0.006	0.011	0.093	0.01	0.027	0.097	0.126	0.051	0.201	-0.014	0.2	0.076	-0.005	0.087
Hereditary and idiopathic peripheral neuropathy	neurological	0.016	0.041	0.03	0.045	0.036	0.067	0.09	0.008	0.054	0.014	-0.041	-0.039	0.034	-0.024	0.044	0.084	-0.02	0.048	0.017	0.021	-0.019	0.066	-0.017	-0.019	0.054	0.038	-0.002	-0.018	0.043	0.019	0.036	0.07	-0.021	0.067	0.011	-0.014	0.091
Inflammatory and toxic neuropathy	neurological	0.01	0.057	0.033	0.049	0.033	0.055	0.112	0.005	0.066	0.015	-0.031	-0.031	0.047	-0.023	0.049	0.063	-0.013	0.027	0.013	0.031	-0.015	0.085	-0.002	-0.016	0.03	0.03	0.002	0.001	0.02	0.046	0.016	0.054	-0.013	0.07	0.01	-0.011	0.094
Myopathy	neurological	-0.007	0.008	0.001	0.031	0.007	0.075	0.121	0	0.02	0.011	-0.004	0.011	0.004	-0.003	0.026	0.023	0.014	0.002	0	-0.006	0.002	0.015	-0.01	0.013	0.012	0.026	0.001	-0.006	0.029	0.003	0.009	0.04	0.011	0.04	0.021	-0.001	0.036
Retinal detachments and defects	sense organs	-0.005	0.026	0.027	0.005	-0.003	0.002	0.01	-0.003	0.004	0.017	-0.014	-0.024	0.001	-0.011	-0.005	0.02	-0.015	0.018	0.001	0.007	-0.008	0.015	-0.006	-0.005	0.007	-0.003	0.002	-0.003	0.015	0.003	-0.002	-0.005	-0.016	0.002	0.008	-0.011	-0.002
Retinal detachment with retinal defect	sense organs	-0.01	0.011	0.019	-0.006	0.005	0.022	0.003	0.004	0.007	0.018	0.001	-0.016	0.007	0.003	0.01	0.011	-0.007	-0.002	0.005	0.008	-0.001	0.023	0	-0.007	0.002	-0.01	-0.009	0.001	0.012	0.003	0.004	0.01	-0.005	0.005	0.002	-0.007	0.006
Macular degeneration, dry	sense organs	0.016	0.003	0.006	0.009	0.008	0.008	0.002	-0.008	-0.005	-0.009	-0.026	-0.019	-0.008	-0.013	0.02	0.004	-0.015	0.006	0.001	-0.002	-0.01	0	-0.01	-0.009	-0.002	-0.014	0.008	-0.015	-0.001	-0.007	-0.008	-0.002	-0.008	-0.005	-0.009	-0.009	0.035
Cystoid macular degeneration of retina	sense organs	0.002	0.005	-0.005	0.003	-0.003	0.018	0.03	-0.007	0.007	-0.009	-0.02	-0.017	-0.005	-0.011	0.008	0.011	-0.014	0.003	0.003	-0.012	-0.009	0.016	-0.009	-0.008	0.008	-0.003	-0.01	-0.013	0.001	0.007	-0.007	0.008	-0.012	0.002	-0.008	-0.008	0.012
Macular puckering of retina	sense organs	0.005	0.013	-0.008	0.023	0.007	0.014	0.028	-0.011	0.013	-0.008	-0.032	-0.026	-0.012	-0.017	0.015	0.022	-0.021	0.012	-0.015	-0.002	-0.014	0.028	-0.013	-0.012	0.01	-0.016	-0.001	-0.003	-0.006	-0.008	0.003	-0.007	-0.014	-0.002	-0.012	-0.012	0.019
Drusen (degenerative) of retina	sense organs	0.014	0.02	0.005	0.003	-0.008	0.039	0.02	-0.007	0.013	-0.009	-0.02	-0.017	-0.001	-0.011	0.016	0.013	-0.014	-0.009	-0.004	-0.006	-0.009	0.016	-0.009	-0.008	0.017	0.009	-0.003	-0.006	-0.008	0.001	0.003	0.008	-0.007	-0.015	-0.008	-0.008	0.004
Macular degeneration (senile) of retina NOS	sense organs	0.012	0.007	-0.006	0.005	0.013	0.017	0.051	-0.009	0.011	-0.01	-0.029	-0.021	-0.006	-0.014	0.062	0.018	-0.017	0.009	-0.002	0.01	-0.012	0.012	-0.011	-0.003	0.03	-0.003	-0.001	-0.024	-0.002	-0.014	-0.008	0.003	-0.01	-0.008	-0.003	-0.009	0.038
Retinal vascular changes and abnomalities	sense organs	0.001	0.009	0.005	0.004	0.007	0.021	0.04	-0.009	0.01	-0.005	-0.026	-0.022	-0.004	-0.01	0.04	0.029	-0.014	0.01	-0.008	0.003	-0.012	0.038	-0.011	-0.01	0.009	-0.01	0.004	-0.018	0.004	0	0.007	0.034	-0.015	0.001	0.01	-0.01	0.058
Peripheral retinal degenerations	sense organs	0.014	0.009	-0.005	0.002	0.012	0.011	0	-0.007	0.006	-0.001	-0.017	-0.018	0.004	-0.012	-0.008	0.032	-0.014	0.026	-0.004	-0.001	-0.01	0.021	-0.009	0	0.008	0	0.011	-0.003	0.001	-0.011	-0.007	-0.008	-0.012	0.002	0	-0.008	-0.003
Retinal edema	sense organs	-0.002	0.008	-0.001	0.001	-0.006	0	0.044	-0.006	0.004	0.002	-0.019	-0.015	-0.007	-0.003	0.048	-0.001	-0.006	0.008	-0.009	0	-0.008	-0.006	0.001	-0.007	0.021	-0.004	-0.001	-0.004	0.003	-0.01	0.005	0.002	-0.01	-0.003	-0.007	-0.007	0.019
Corneal opacity	sense organs	0.004	0.003	-0.007	0	-0.001	0.007	0.02	0.004	0.002	-0.008	-0.007	-0.016	0.003	-0.004	0.011	0.004	0.004	-0.006	-0.009	0.009	0.007	0.022	0.001	0.012	0.002	0	-0.009	-0.01	-0.007	-0.003	0.016	0.002	-0.005	-0.004	-0.007	-0.007	0.003
Corneal degenerations	sense organs	-0.002	0.023	-0.001	0.031	0.029	0.024	0.01	-0.006	-0.001	0.019	-0.016	-0.015	0.003	-0.003	0.011	0.013	-0.012	0.004	-0.001	-0.007	-0.008	0.017	-0.008	-0.007	0.002	0.001	-0.008	-0.001	0.003	-0.01	0.005	0.011	-0.004	0.022	-0.007	-0.007	0.005
Corneal dystrophy	sense organs	-0.002	0.013	-0.001	-0.011	0.007	0.008	0.023	-0.006	0.015	-0.007	-0.018	-0.015	0.015	-0.01	0.021	0.008	-0.006	0.019	0.015	-0.01	-0.008	0.008	-0.007	-0.007	0.013	0.006	0	-0.005	0.004	-0.009	0.006	0.031	-0.01	0.003	0.003	-0.007	0.005
Glaucoma	sense organs	0.026	0.032	0.011	0.015	0.009	0.022	0.043	-0.001	0.024	0.01	-0.043	-0.043	0.003	-0.024	0.033	0.05	-0.027	0.023	-0.002	0.004	-0.02	0.057	-0.012	-0.015	0.019	-0.002	-0.013	0	0.006	0.002	0	0.012	-0.026	-0.006	-0.005	-0.018	0.057
Open-angle glaucoma	sense organs	0.025	0.011	-0.005	0.011	0.007	0.028	0.028	-0.001	0.021	0.022	-0.026	-0.03	0.016	-0.016	0.033	0.039	-0.018	0.011	-0.01	-0.003	-0.008	0.025	-0.015	0.001	0.025	-0.003	-0.009	-0.018	-0.003	-0.001	-0.006	0	-0.011	-0.009	-0.014	-0.013	0.023
Primary open angle glaucoma	sense organs	0.012	0.01	0.001	0.013	0.012	-0.001	0.022	-0.001	0.002	-0.004	-0.025	-0.022	0	-0.014	0.028	0.007	-0.017	-0.002	0.008	-0.004	-0.012	0.011	-0.011	-0.003	-0.004	-0.003	-0.012	-0.02	-0.01	0.001	-0.009	0.009	-0.006	0.002	-0.01	-0.01	0.023
Primary angle-closure glaucoma	sense organs	-0.002	0.018	-0.001	0.007	0.001	-0.008	-0.006	-0.006	0.012	0.002	-0.015	-0.015	0.004	-0.003	0.031	0.031	-0.012	0.018	-0.001	0.001	-0.008	0.019	0.001	-0.007	0.003	-0.004	0	0	0.004	-0.009	-0.006	0.003	-0.01	0.002	0.013	-0.007	0.021
Cataract	sense organs	0.048	0.054	0.006	0.04	0.036	0.047	0.073	-0.011	0.04	-0.008	-0.072	-0.066	-0.005	-0.034	0.058	0.093	-0.04	0.027	-0.009	0.022	-0.024	0.094	-0.029	-0.024	0.052	0.004	-0.024	-0.02	0.008	-0.006	0.018	0.015	-0.035	0.003	0.001	-0.022	0.094
Senile cataract	sense organs	0.043	0.062	-0.001	0.036	0.028	0.042	0.05	-0.013	0.032	0.004	-0.097	-0.08	-0.005	-0.046	0.052	0.117	-0.057	0.047	0.004	-0.003	-0.042	0.105	-0.037	-0.035	0.06	-0.006	-0.015	-0.024	0.017	-0.002	0.022	0.025	-0.044	-0.001	-0.004	-0.029	0.087
Disorders of refraction and accommodation; blindness and low vision	sense organs	0.034	0.111	0.01	0.013	0.023	-0.002	-0.009	0.006	0.043	0.005	-0.067	-0.055	-0.003	-0.033	0.005	0.098	-0.034	0.061	0.036	0.038	-0.023	0.09	0.006	-0.019	0.004	0.005	-0.007	0.074	0.028	0.008	0.007	0.03	-0.029	0.001	0.008	-0.021	0.058
Myopia	sense organs	0.08	0.104	0.035	0.027	0.013	-0.005	-0.007	-0.012	0.025	0.02	-0.052	-0.053	-0.003	-0.035	-0.009	0.109	-0.03	0.085	0.033	0.024	-0.026	0.119	-0.025	-0.011	0.001	0.01	-0.015	0.048	0.026	0	0.018	0.026	-0.018	-0.011	0.003	-0.012	0.008
Astigmatism	sense organs	0.096	0.084	0.036	0.026	0.02	0.011	0.023	-0.014	0.021	0.003	-0.044	-0.043	0.004	-0.019	0.014	0.095	-0.012	0.056	0.015	0.025	-0.022	0.132	-0.025	-0.009	0.03	0.004	-0.008	0.011	0.008	0.001	0.021	0.033	-0.01	-0.01	-0.006	-0.017	0.032
Presbyopia	sense organs	0.102	0.119	0.032	0.041	0.028	0.013	0.018	-0.012	0.034	0.011	-0.098	-0.089	-0.008	-0.055	0.019	0.125	-0.065	0.085	0.026	0.029	-0.048	0.154	-0.041	-0.039	0.024	-0.006	-0.013	0.034	0.017	-0.003	0.024	0.031	-0.057	-0.006	-0.015	-0.035	0.082
Hypermetropia	sense organs	0.063	0.057	0.002	0.031	0.023	0.032	0.021	-0.004	0.026	-0.001	-0.025	-0.017	0.011	-0.002	0.016	0.042	0.007	0.032	0.002	0.015	-0.005	0.069	-0.023	-0.005	0.018	-0.001	-0.004	-0.01	0.01	0.002	0.013	0.032	0.012	0.006	-0.008	-0.003	0.048
Blindness and low vision	sense organs	0.008	-0.008	0.031	0.006	0.009	0.029	0.048	0.007	0.023	0.003	0.056	0.035	0.029	0.045	0.003	0.026	0.084	0	0.01	0.006	0.083	0.014	-0.011	0.039	0.004	0.019	0	0.033	-0.002	0.007	0.016	0.01	0.032	0.014	0.005	0.027	0.017
Visual disturbances	sense organs	0.029	0.065	0.042	0.026	0.016	0.03	0.041	0.012	0.074	0.035	0.019	0.005	0.03	0.004	0.029	0.085	0.034	0.047	0.02	0.044	0.035	0.083	0	0.015	0.027	0.019	0.016	0.032	0.055	0.006	0.042	0.049	0.023	0.018	0.032	0.013	0.037
Amblyopia	sense organs	0.002	0.005	-0.005	0.008	0.027	-0.01	0.01	0.002	0.005	-0.001	0.055	0.037	0.009	0.036	0	0.003	0.092	0.019	-0.004	-0.003	0.033	0.014	-0.009	0.067	-0.008	-0.004	-0.003	0.021	-0.008	0.001	-0.007	0	0.071	-0.007	0	0.052	-0.012
Diplopia and disorders of binocular vision	sense organs	0.026	0.032	0.005	0.004	-0.005	0.021	0.048	0.006	0.031	-0.005	-0.019	-0.013	0.004	-0.01	0.002	0.037	-0.002	0.02	0.008	0.01	-0.012	0.032	-0.011	-0.01	0.016	0.003	-0.001	0.006	0.032	-0.004	0.022	0.041	-0.006	0.016	0.017	0.011	0.029
Anisometropia	sense organs	0.017	0.021	-0.013	-0.001	-0.001	-0.009	-0.008	-0.007	0.005	0	0.006	-0.004	-0.009	0.021	0.018	0.011	0.003	0.001	-0.002	0	0.006	0.034	-0.008	0.002	0.001	-0.001	-0.002	-0.012	0.002	-0.004	-0.006	0.018	0.019	-0.005	-0.007	0.002	-0.014
Visual field defects	sense organs	0.04	0.031	-0.009	0.015	0.023	0.036	0.029	-0.008	0.016	0.016	-0.014	-0.017	0.01	-0.009	0.017	0.037	0	0.003	0.005	-0.003	-0.005	0.036	-0.01	0.005	0.018	0.016	0	-0.011	0.02	0.002	0	0.045	0.004	0.008	0.012	0.013	0.021
Subjective visual disturbances	sense organs	0.037	0.037	0.013	0.006	0.005	0.029	0.036	-0.002	0.038	0.012	0.002	0	0.015	-0.015	0.037	0.048	0.007	0.04	0.021	0.024	0.014	0.037	-0.006	-0.004	0.02	0.007	0.008	-0.019	0.009	0.008	0.027	0.043	0.009	0.009	-0.004	0.028	0.034
Eye infection, viral	sense organs	0.029	0.02	-0.006	-0.011	0.007	0.017	0	0.006	0.01	0.021	-0.011	-0.01	0.01	-0.002	0.012	0.029	-0.012	0.034	0.023	0.005	-0.008	0.031	0.002	-0.007	0.013	0.012	-0.008	0.004	0.035	0.005	0.006	-0.007	-0.003	-0.007	0.014	-0.006	0.009
Conjunctivitis, infectious	sense organs	0.059	0.096	0.04	0.014	0.018	0.014	0.013	0.034	0.067	0.009	0.068	0.049	0.031	0.06	0.004	0.079	0.073	0.045	0.037	0.05	0.024	0.085	0.023	0.016	-0.005	0.032	0.016	0.098	0.039	0.022	0.013	0.017	0.06	0.011	0.01	0.014	0.018
Superficial keratitis	sense organs	0.006	0.019	0.028	0.002	0.019	-0.008	0.006	-0.006	0.023	0.011	-0.011	-0.015	0.015	-0.01	0.012	0.011	-0.012	0.024	-0.009	0.012	0.001	0.025	0.002	-0.007	0.003	0.017	-0.008	-0.002	0.014	0.005	0.006	0.003	-0.004	0.003	-0.007	-0.006	0.036
Keratoconjunctivitis sicca	sense organs	-0.001	0.023	-0.006	0.002	0.001	0.017	0.012	-0.006	0.005	0.002	-0.014	-0.014	0.011	-0.009	0.032	0.027	-0.011	0.001	0.008	-0.002	-0.008	0.022	-0.007	-0.007	0.023	0.007	-0.008	0.005	0.015	-0.009	-0.006	-0.007	-0.003	0.003	-0.006	-0.006	-0.002
Uveitis, noninfectious or NOS	sense organs	0.023	0.029	0.025	0.015	0.014	0.003	0.017	-0.008	0.005	0.005	-0.007	-0.015	0.006	-0.007	-0.001	0.023	-0.015	0.015	-0.011	0.013	-0.01	0.037	-0.002	-0.009	-0.009	-0.006	-0.004	0	0.016	0.016	-0.007	0.014	0.003	0	0.007	-0.008	0.033
Allergic conjunctivitis	sense organs	0.019	0.001	0.032	0.013	0.011	0.003	0.015	0.025	0.041	0.006	0.037	0.027	0.03	0.027	0.012	0.045	0.034	0.016	0.009	0.042	0.03	0.052	-0.004	-0.002	0.013	0.034	0.011	0.029	0.01	0.017	0.002	0.028	0.027	-0.002	0.009	0.026	-0.002
Inflammation of eyelids	sense organs	0.053	0.073	0.014	0.036	0.031	0.03	0.021	0.011	0.045	0.014	-0.024	-0.023	0.006	-0.014	0.025	0.053	-0.016	0.043	0.007	0.017	-0.005	0.045	-0.017	0.012	0.021	-0.009	-0.007	0.011	0.027	-0.008	0.02	0.013	-0.001	0.017	0.002	-0.007	0.045
Disorders of conjunctiva	sense organs	0.007	0.018	0.01	0.019	0.025	0.017	0.003	0.015	0.023	0.002	-0.008	-0.012	-0.014	0.006	-0.01	0.028	0.007	0.016	0.004	0.015	0	0.026	-0.011	0.004	0.004	0.012	-0.001	0.016	-0.002	-0.008	0.024	0.01	0.004	0.003	0.004	0.005	0.033
Other disorders of eyelids	sense organs	0.038	0.014	0.004	0.007	0.006	0.004	0.01	0.002	0.017	0.006	0.004	-0.006	-0.01	-0.012	-0.001	0.024	0.009	0.01	0.015	0.028	0.025	0.018	-0.009	-0.008	0.032	-0.004	0.003	0.017	0.009	-0.005	0.022	0.007	0.004	-0.007	0	0.009	0.024
Ectropion or entropion	sense organs	0.014	0.015	0.006	0.002	0.008	0.009	-0.005	0.006	-0.003	-0.007	-0.014	-0.004	-0.006	-0.009	0.003	0.011	-0.005	0.031	-0.008	-0.001	-0.008	0.008	-0.007	-0.006	0.024	-0.003	0.001	-0.006	0.004	-0.001	0.018	-0.007	-0.003	-0.002	-0.006	-0.006	0.032
Ptosis of eyelid	sense organs	0.039	0.035	0.011	0.002	-0.003	0.042	0.022	0.021	0.032	0.008	-0.008	-0.016	-0.006	-0.013	0.009	0.038	0.015	0.037	0.007	0.006	0	0.037	-0.013	-0.006	0.027	0.024	0.004	0.01	0.018	0.004	0.042	0.009	-0.003	-0.002	0.011	-0.006	0.02
Dermatochalasis	sense organs	0.056	0.036	0.004	0.006	0.013	0.025	0.02	-0.006	0.014	-0.005	-0.035	-0.027	-0.011	-0.019	0.024	0.054	-0.018	0.066	0.014	0.005	-0.016	0.048	-0.015	-0.014	0.045	0.003	0.008	0.001	0.007	-0.012	0.006	0.015	-0.021	0	-0.008	-0.013	0.042
Dry eyes	sense organs	0.047	0.08	0.013	0.024	0.025	0.032	0.04	0.01	0.041	0.008	-0.052	-0.05	0.007	-0.031	0.028	0.104	-0.027	0.058	0.01	0.029	-0.025	0.101	-0.02	-0.02	0.035	0.004	0.004	-0.012	0.037	0.02	0.029	0.046	-0.024	0.026	0.01	-0.02	0.044
Epiphora	sense organs	0.022	0.024	0	0.002	0.014	0.001	0.001	0.006	0.006	0.002	-0.004	-0.014	0.005	-0.009	0.013	0.039	0	0.03	0	0.002	-0.008	0.022	-0.007	-0.007	-0.007	0.007	-0.008	0.008	0.015	-0.009	0.006	0.003	-0.003	0.009	-0.006	-0.006	0.019
Disorders of optic nerve and visual pathways	sense organs	0.005	0.01	-0.007	-0.011	0.006	0.039	0.021	0.026	0.015	-0.007	0.003	0.007	0.003	0.004	0.011	0.026	0.016	0.013	0.014	0.003	0.008	0.017	-0.008	0.022	0.012	0.005	0.007	0.012	-0.007	0.011	0.005	0.03	0.021	0.002	0.022	0.023	0.012
Optic atrophy	sense organs	-0.005	-0.002	0.018	0.007	0.016	-0.01	0.028	-0.007	0.008	0.006	0.001	-0.007	-0.002	0	0.038	0.025	0.014	0.013	-0.01	-0.002	0.004	0.021	-0.009	0.008	0.024	-0.017	-0.01	-0.013	-0.008	0	0.002	-0.001	-0.007	0.005	0	-0.008	0.011
Optic neuritis/neuropathy	sense organs	0.018	-0.011	0.009	0.006	-0.012	0.022	0.026	0.025	0.021	0.001	-0.007	-0.011	0.002	0.003	-0.007	0.026	0.015	0.016	-0.009	-0.002	0.007	0.029	-0.008	0.011	0.002	0.009	-0.001	0.01	0.022	0.017	0.026	0.011	0.002	-0.004	0.012	0.003	-0.003
Strabismus and other disorders of binocular eye movements	sense organs	0.006	0.019	0.011	0.008	0.007	0.017	0.023	0.016	0.015	0.002	0.048	0.027	-0.007	0.018	0.021	0.022	0.063	0.019	-0.001	0.019	0.051	0.02	-0.007	0.033	0.003	0.011	0	0.022	0.024	0.005	0.017	0.031	0.042	0.003	0.023	0.024	-0.015
Strabismus (not specified as paralytic)	sense organs	0.024	0.003	0.015	0	-0.004	0.003	0.013	0.001	0.027	0.002	0.069	0.095	0.014	0.047	0.003	0.008	0.123	0.015	0.005	0.023	0.05	0.018	-0.014	0.079	-0.007	0.019	0.012	0.03	0.016	0.002	0.021	0.013	0.086	0.002	0.01	0.055	-0.004
Other disorders of eye	sense organs	0.01	0.016	0.039	0.005	-0.007	0.014	0.014	0.014	0.023	0.009	0.028	0.022	0.012	0.009	0.001	0.017	0.04	0.028	-0.002	0.004	0.022	0.013	-0.008	0.02	-0.007	0.003	-0.009	0.026	0.03	0.003	0.004	-0.008	0.037	-0.009	0.011	0.021	0.016
Disorders of vitreous body	sense organs	0.035	0.046	0.006	0.011	0.012	0.025	0.02	-0.011	0.013	0.012	-0.06	-0.058	-0.014	-0.034	0.024	0.08	-0.037	0.051	0.013	-0.012	-0.029	0.065	-0.022	-0.024	0.027	-0.02	0.003	-0.004	0.014	-0.005	0.015	0.02	-0.029	-0.007	-0.007	-0.023	0.029
Pain, swelling or discharge of eye	sense organs	0.028	0.037	0.02	0.034	0.023	0.034	0.043	0.001	0.043	0.005	0.008	-0.008	0.04	-0.002	0.028	0.039	0.003	0.029	0.007	0.015	-0.004	0.041	0.011	-0.009	0.036	0.036	-0.011	0.022	0.031	0.021	0.064	0.028	-0.013	0.011	0.007	0.007	0.033
Otitis externa	sense organs	0.046	0.062	0.043	0.018	0.018	0.01	-0.001	0.031	0.051	0.009	0.079	0.04	0.028	0.046	-0.004	0.054	0.054	0.032	0.015	0.048	0.039	0.062	0.024	0.031	-0.004	0.03	0.009	0.103	0.033	0.008	0.02	0.032	0.04	0.007	0.013	0.029	0.027
Impacted cerumen	sense organs	0.029	0.04	0.019	0.025	0.007	0.007	0.018	0.003	0.037	-0.009	0.013	0.019	0.003	0.013	0.041	0.036	0.044	0.028	0.012	0.031	0.01	0.028	-0.015	0.047	0.016	-0.008	-0.003	0.053	0.005	0.001	-0.002	0.004	0.042	-0.008	-0.005	0.007	0.027
Otitis media	sense organs	0.042	0.033	0.034	-0.012	-0.011	0.01	0.005	0.028	0.062	0.02	0.199	0.19	0.023	0.134	-0.015	0.017	0.208	0.021	0.032	0.039	0.093	0.007	0.012	0.135	-0.007	0.057	0.035	0.126	0.011	0	0.034	0.008	0.177	-0.01	0.013	0.094	-0.018
Suppurative and unspecified otitis media	sense organs	0.037	0.062	0.049	0.003	0.006	0.007	-0.01	0.077	0.088	0.018	0.225	0.191	0.045	0.167	-0.008	0.046	0.196	0.022	0.033	0.073	0.115	0.035	0.053	0.11	-0.01	0.057	0.033	0.19	0.031	0.021	0.027	0.026	0.175	0.006	0.032	0.091	0.008
Eustachian tube disorders	sense organs	0.064	0.046	0.04	-0.006	0.002	0.011	0.003	0.024	0.053	0.004	0.084	0.072	0.012	0.053	0.001	0.046	0.098	0.019	0.01	0.05	0.027	0.039	0.006	0.047	0.017	0.032	0.016	0.034	0.027	0.013	0.014	0.037	0.083	0.008	0.026	0.042	0.002
Otalgia	sense organs	0.045	0.056	0.052	0.024	0.01	0.022	0.005	0.052	0.085	0.034	0.082	0.08	0.04	0.079	0.001	0.068	0.079	0.032	0.028	0.056	0.051	0.08	0.017	0.054	0.006	0.068	0.035	0.122	0.049	0.034	0.046	0.052	0.069	0.017	0.023	0.045	0.029
Perforation of tympanic membrane	sense organs	0.01	0.037	0.002	-0.006	-0.007	-0.002	-0.003	-0.007	0.015	-0.008	0.027	0.009	0.006	0.008	0.001	0.024	0.039	0.027	0.005	0.019	-0.001	0.018	0.016	0.019	-0.008	0.012	0.006	0.017	0.011	0.003	0.014	0.01	0.03	0.009	0.011	0.011	0.008
Peripheral or central vertigo	sense organs	0.044	0.054	0.018	0.001	0	0.005	0.014	-0.003	0.039	0.005	-0.033	-0.033	-0.007	-0.021	0.024	0.054	-0.021	0.025	0.002	0.029	-0.018	0.053	-0.012	-0.015	0.021	0.002	-0.003	0.007	0	0.005	0.014	0.028	-0.023	0.012	0.004	-0.005	0.031
Dizziness and giddiness (Light-headedness and vertigo)	sense organs	0.092	0.126	0.072	0.046	0.048	0.061	0.084	0.03	0.153	0.043	-0.04	-0.061	0.053	-0.033	0.047	0.187	-0.035	0.103	0.054	0.083	-0.022	0.165	0.006	-0.026	0.05	0.056	0.021	0.029	0.07	0.079	0.05	0.068	-0.036	0.057	0.049	-0.018	0.099
Other disorders of ear	sense organs	0.029	0.024	0.011	0.009	0.008	-0.002	0.002	0.003	0.009	0	-0.001	-0.013	-0.004	-0.005	-0.008	0.007	-0.008	-0.004	-0.003	-0.011	-0.002	0.011	-0.008	-0.008	-0.008	0.006	-0.002	0.008	0.011	0.008	-0.007	0	-0.006	0.004	0.001	-0.007	0.016
Hearing loss	sense organs	0.022	0.044	0.019	0.014	0.009	0.014	0.036	0.054	0.045	0.015	0.124	0.185	0.013	0.094	0.022	0.042	0.194	0.025	0.027	0.023	0.089	0.035	-0.007	0.083	0.014	0.019	0.026	0.085	0.034	0.007	0.019	0.015	0.202	-0.002	0.021	0.073	0.032
Sensorineural hearing loss	sense organs	0.045	0.066	0.008	0.024	0.016	0.016	0.04	0.01	0.031	0.001	-0.04	-0.033	0	-0.022	0.03	0.08	-0.001	0.038	0.003	0.007	-0.009	0.076	-0.026	-0.002	0.058	0.004	0	0.002	0.034	0.011	0.018	0.023	-0.001	0.009	0.016	-0.014	0.054
Conductive hearing loss	sense organs	-0.006	0.005	0.011	-0.011	-0.011	0.017	0.009	0.031	0.041	0.005	0.14	0.1	-0.007	0.069	-0.006	0.015	0.155	0.019	0	0.016	0.068	0.006	-0.007	0.085	0.001	0.011	0.041	0.057	0.008	0.002	0.004	0.023	0.127	-0.015	0.025	0.07	-0.03
Tinnitus	sense organs	0.05	0.059	0.027	0.012	0.014	-0.013	0.005	0.009	0.049	0.004	-0.037	-0.037	0.001	-0.019	0.006	0.076	-0.019	0.034	0.003	0.029	-0.016	0.079	-0.017	-0.011	0.018	0.008	0.002	0.02	0.028	0.004	0.006	0.02	-0.013	0.017	0.008	-0.014	0.037
Mitral valve stenosis and aortic valve stenosis	circulatory system	0.004	0.012	-0.002	0.012	-0.001	0.023	0.042	-0.006	-0.003	-0.008	-0.023	-0.016	-0.003	-0.01	0.028	0.015	0.004	0.007	0.006	-0.011	-0.008	0.001	-0.008	0.002	0.02	-0.01	-0.001	-0.003	0.003	-0.003	0.005	0.02	-0.011	0.006	0.002	0.003	0.036
Mitral valve disease	circulatory system	0.002	0.014	0.001	-0.002	-0.003	0.026	0.041	0.003	0.003	0	-0.019	-0.009	0.005	-0.011	0.008	0.011	-0.004	0.008	-0.003	0.001	-0.002	0.01	-0.009	0.009	0	0.006	0.004	0.002	0.001	0.008	0.013	-0.008	-0.006	0.003	0.009	-0.008	0.025
Disease of tricuspid valve	circulatory system	0.005	0.016	0.005	0.016	0.015	0.038	0.059	-0.01	0.034	-0.007	-0.03	-0.023	0.01	-0.013	0.01	0.02	-0.007	0.019	0.012	0.003	-0.014	0.014	-0.003	-0.012	0.011	0.008	-0.01	-0.001	0	0.008	0.01	0.015	-0.018	0.034	-0.006	-0.006	0.027
Nonrheumatic mitral valve disorders	circulatory system	-0.004	0.007	-0.005	0.011	-0.001	0.045	0.076	-0.01	0.011	-0.003	-0.053	-0.038	-0.011	-0.029	0.037	0.023	-0.018	0.021	-0.011	-0.012	-0.022	0.015	-0.023	-0.002	0.018	-0.003	-0.006	0.004	0.003	-0.006	0.008	0.008	-0.027	0.007	-0.011	-0.013	0.055
Nonrheumatic aortic valve disorders	circulatory system	-0.002	-0.003	-0.005	0.011	-0.001	0.068	0.1	-0.015	-0.004	-0.017	-0.052	-0.043	-0.009	-0.026	0.043	0.023	-0.013	0.007	-0.002	-0.023	-0.02	0.01	-0.021	-0.012	0.045	0.009	-0.016	-0.03	-0.011	-0.004	0.012	0.012	-0.031	0.006	-0.008	-0.018	0.065
Nonrheumatic tricuspid valve disorders	circulatory system	0.006	0	-0.007	-0.004	-0.009	0.031	0.077	-0.009	0.007	-0.005	-0.033	-0.022	-0.004	-0.015	0.008	0.013	-0.014	0.009	0.002	-0.007	-0.012	0.004	-0.005	-0.01	0.002	0.006	-0.002	-0.009	-0.01	-0.005	-0.009	-0.004	-0.016	-0.003	-0.01	-0.01	0.024
Heart valve replaced	circulatory system	0	0.004	-0.012	0.008	-0.004	0.045	0.062	-0.011	0.004	-0.013	-0.03	-0.027	-0.01	-0.017	0.03	0.013	-0.009	0.006	-0.007	-0.015	-0.014	0.004	-0.008	-0.012	0.009	0	-0.01	-0.022	-0.006	-0.009	0.015	0.003	-0.018	0.02	-0.001	-0.012	0.053
Abnormal heart sounds	circulatory system	0.011	0.037	0.021	0.016	0.009	0.03	0.018	-0.001	0.024	-0.003	-0.001	-0.012	0.01	-0.001	0.021	0.039	0.008	0.03	0.013	0.016	0.001	0.041	-0.004	-0.017	0.011	0.003	0.003	0.048	0.017	-0.003	0.004	0.018	0.009	0.008	0.008	-0.004	0.022
Essential hypertension	circulatory system	0.034	0.048	0.009	0.061	0.063	0.064	0.119	-0.017	0.047	0.008	-0.193	-0.174	0.005	-0.099	0.059	0.13	-0.106	0.056	0.015	-0.016	-0.081	0.094	-0.06	-0.066	0.058	0.006	-0.034	-0.031	0.025	0.01	0.02	0.031	-0.104	0.032	0.007	-0.065	0.178
Hypertensive heart and/or renal disease	circulatory system	-0.012	0.014	0.009	0.008	0.002	0.055	0.128	-0.008	0.017	-0.003	-0.022	-0.02	0.003	-0.003	0.06	0.022	-0.008	0.001	-0.006	-0.004	-0.011	0.041	-0.01	-0.009	0.034	0.007	-0.011	-0.015	-0.009	-0.007	0.026	0.012	-0.014	0.02	-0.002	-0.009	0.09
Hypertensive heart disease	circulatory system	-0.019	0.006	-0.018	0	-0.001	0.043	0.081	-0.016	0.016	-0.006	-0.051	-0.04	-0.005	-0.026	0.049	0.038	-0.021	0.029	-0.015	-0.021	-0.019	0.03	-0.017	-0.018	0.051	0.013	-0.013	-0.035	-0.01	-0.012	-0.003	0.021	-0.02	0.017	-0.011	-0.014	0.079
Hypertensive chronic kidney disease	circulatory system	-0.008	0.006	-0.011	0.003	-0.001	0.08	0.145	-0.013	0.016	0.01	-0.059	-0.049	0.006	-0.028	0.038	0.046	-0.026	0.016	-0.003	-0.007	-0.017	0.051	-0.02	-0.02	0.028	0.028	-0.013	-0.041	0.003	-0.009	0.034	0.015	-0.033	0.043	-0.001	-0.016	0.08
Other hypertensive complications	circulatory system	0.002	0.008	0.007	-0.002	-0.006	0.04	0.05	0	0.035	0.001	-0.017	-0.024	0.005	-0.011	0.026	0.018	-0.005	0.034	0.012	0.003	-0.007	0.021	0.014	-0.008	0.012	0	-0.007	-0.001	0.004	0.004	-0.005	0.007	-0.013	0.01	0.013	-0.007	0.037
Elevated blood pressure reading without diagnosis of hypertension	circulatory system	0.051	0.08	0.023	0.028	0.03	-0.006	0	0.005	0.044	0.021	-0.049	-0.045	0.003	-0.024	-0.006	0.074	-0.028	0.042	0.016	0.024	-0.014	0.067	-0.011	-0.015	0.009	0.006	-0.002	0.031	0.029	0.016	0.007	0.026	-0.025	0.005	0.024	-0.02	0.035
Unstable angina (intermediate coronary syndrome)	circulatory system	-0.01	-0.01	-0.007	0.002	0.007	0.023	0.052	-0.003	0.011	0.013	-0.05	-0.039	0.01	-0.025	0.026	0.035	-0.022	0.01	-0.011	-0.012	-0.021	0.02	-0.02	-0.018	0.035	0.018	-0.012	-0.014	0.007	0.003	0.012	0	-0.024	0.008	-0.002	-0.017	0.111
Myocardial infarction	circulatory system	0.003	0.006	0.002	0.017	0.012	0.04	0.126	-0.001	0.031	-0.004	-0.065	-0.052	0.011	-0.032	0.04	0.05	-0.021	0.01	-0.005	0.003	-0.028	0.025	-0.026	-0.021	0.022	0.01	-0.019	-0.024	0.002	0.01	0.014	0.007	-0.034	0.044	0.003	-0.017	0.184
Angina pectoris	circulatory system	-0.001	0.017	0.016	0.013	0.006	0.049	0.086	0.006	0.033	0.007	-0.056	-0.048	0.017	-0.027	0.027	0.065	-0.021	0.021	0.007	0.001	-0.026	0.049	-0.024	-0.015	0.025	0.029	-0.005	-0.02	0.012	0.021	0.019	0.024	-0.031	0.037	0.014	-0.018	0.128
Coronary atherosclerosis	circulatory system	-0.013	-0.015	-0.023	0.022	0.015	0.049	0.113	-0.021	-0.011	-0.002	-0.116	-0.09	-0.017	-0.057	0.047	0.031	-0.055	0.01	0.002	-0.041	-0.049	0.001	-0.045	-0.039	0.033	-0.01	-0.037	-0.043	0.001	-0.019	0.015	0.008	-0.058	0.016	-0.009	-0.034	0.184
Other chronic ischemic heart disease, unspecified	circulatory system	-0.009	-0.002	-0.006	0.006	-0.004	0.053	0.094	-0.009	0.012	0.008	-0.066	-0.049	-0.01	-0.032	0.045	0.034	-0.025	0.013	-0.009	-0.016	-0.027	0.017	-0.025	-0.023	0.026	0.011	-0.022	-0.026	0.004	0	0.01	0.007	-0.032	0.019	-0.013	-0.015	0.133
Other forms of chronic heart disease	circulatory system	-0.002	0.014	-0.005	0.005	0.012	0.037	0.084	-0.016	0.006	0.001	-0.047	-0.037	0.014	-0.026	0.024	0.027	-0.019	0.014	-0.012	-0.018	-0.015	0.017	-0.017	-0.015	0.04	0.014	-0.01	-0.019	0.002	0.004	0.006	0.014	-0.023	0.024	0.004	-0.014	0.085
ASCVD	circulatory system	-0.01	-0.001	0.008	0.011	0.015	0.022	0.035	-0.006	0.015	0.001	-0.023	-0.016	0.002	-0.01	0.027	0.021	-0.013	-0.011	-0.009	0.014	-0.009	0.004	-0.008	-0.007	0.002	-0.006	-0.009	-0.007	0.002	-0.004	-0.006	-0.008	-0.011	0.005	0.002	-0.007	0.064
Pulmonary heart disease	circulatory system	0.011	0.032	0.013	0.025	0.036	0.071	0.099	-0.001	0.046	-0.005	-0.019	-0.022	0.034	-0.014	0.022	0.038	-0.01	0.017	0.024	0.027	-0.012	0.05	0.007	-0.01	-0.01	0.023	-0.007	0.019	0.018	0.044	0.022	0.009	-0.015	0.061	0.024	-0.01	0.077
Pulmonary embolism and infarction, acute	circulatory system	0.011	0.028	-0.001	0.021	0.038	0.046	0.061	-0.001	0.038	-0.005	-0.022	-0.03	0.033	-0.019	0.01	0.042	-0.018	0.014	0.03	0.018	-0.016	0.039	-0.001	-0.014	-0.014	0.02	0	-0.001	0.023	0.035	0.012	0.005	-0.017	0.05	0.027	-0.013	0.075
Chronic pulmonary heart disease	circulatory system	-0.004	0.037	-0.005	0.021	0.014	0.065	0.101	-0.004	0.047	0.004	-0.035	-0.026	-0.006	-0.013	0.013	0.045	-0.007	0.022	-0.003	-0.003	-0.007	0.03	-0.013	-0.002	0.006	0.017	0.006	-0.012	0.008	0.001	0.017	0.009	-0.012	0.023	0.011	-0.006	0.074
Primary pulmonary hypertension	circulatory system	0.01	0.019	-0.003	-0.007	-0.002	0.028	0.038	0.003	0.023	0	-0.015	-0.008	-0.004	0.002	0.034	0.01	0.007	0.001	0.011	-0.007	-0.001	0.013	-0.008	0.01	-0.008	0.011	0.005	0.004	0.011	0.002	0.024	0.018	0	-0.005	0.01	0.002	0.017
Cardiomegaly	circulatory system	-0.007	0.038	-0.004	0.033	0.025	0.072	0.14	-0.014	0.019	-0.008	-0.059	-0.046	-0.006	-0.031	0.022	0.048	-0.015	0.018	0.006	-0.012	-0.015	0.04	-0.023	-0.014	0.03	0.016	-0.021	-0.026	-0.004	-0.013	0.029	0.008	-0.027	0.023	-0.008	-0.016	0.105
Nonspecific chest pain	circulatory system	0.08	0.113	0.058	0.067	0.075	0.074	0.11	0.016	0.141	0.028	-0.1	-0.113	0.043	-0.058	0.041	0.205	-0.069	0.118	0.025	0.047	-0.049	0.173	-0.009	-0.045	0.05	0.054	0.006	0.01	0.063	0.065	0.052	0.062	-0.068	0.074	0.036	-0.032	0.2
Precordial pain	circulatory system	0.007	0.016	0.015	0.03	0.022	0.057	0.073	0.001	0.045	0.012	-0.027	-0.025	0.028	-0.018	0.018	0.051	-0.006	0.01	0.01	-0.001	-0.015	0.033	-0.014	-0.012	-0.013	0.035	-0.002	-0.005	0.022	0.038	0.046	0.045	-0.015	0.053	0.02	-0.001	0.058
Pericarditis	circulatory system	0.015	0.01	0	0.011	0.002	0.03	0.046	-0.009	0.016	-0.005	-0.031	-0.023	-0.008	-0.015	0.008	0.031	-0.011	0.024	0.002	-0.004	-0.012	0.035	-0.011	-0.01	0.021	0.014	0.008	-0.003	-0.003	0.004	0.006	-0.005	-0.016	0.024	0.003	-0.01	0.062
Endocarditis	circulatory system	0.013	0.025	0.005	0.032	0.025	0.033	0.064	0.005	0.025	0.002	-0.018	-0.015	0.01	-0.01	0.012	0.023	-0.006	0.01	0.015	0.008	-0.008	0.013	-0.007	-0.007	-0.007	0.022	0	-0.016	0.014	0.012	0.006	0.003	-0.01	0.05	0.003	-0.006	0.049
Primary/intrinsic cardiomyopathies	circulatory system	-0.008	0.016	-0.005	0.012	0.008	0.04	0.051	-0.016	0.012	-0.009	-0.049	-0.038	-0.011	-0.024	0.017	0.023	-0.021	0.011	0	-0.016	-0.012	-0.001	-0.02	-0.015	0.007	0.01	-0.016	-0.021	-0.002	-0.006	0.01	0.006	-0.02	0.02	-0.007	-0.018	0.081
Secondary/extrinsic cardiomyopathies	circulatory system	-0.006	0.013	-0.006	-0.003	0	0.038	0.041	-0.01	0.026	-0.012	-0.033	-0.021	-0.006	-0.016	0	0.022	-0.016	0.023	0.005	-0.018	-0.003	0.009	-0.007	-0.011	0.001	-0.001	-0.003	-0.004	0.008	-0.011	0.012	0	-0.013	0.014	-0.011	-0.011	0.043
Cardiac conduction disorders	circulatory system	-0.007	-0.004	-0.008	-0.006	-0.007	0.031	0.085	-0.008	0.005	-0.003	-0.03	-0.02	-0.001	-0.013	0.011	0.016	-0.012	0.011	-0.012	-0.005	-0.011	0.01	-0.01	-0.009	0.026	0.01	-0.011	-0.001	-0.001	-0.013	0	-0.01	-0.004	0.001	-0.002	-0.009	0.066
First degree AV block	circulatory system	0.004	0.023	-0.003	0.004	0.003	0.004	0.05	0.002	0.004	0.002	-0.028	-0.022	0.005	-0.017	0.04	0.031	-0.012	0.024	0.002	-0.003	-0.005	0.022	-0.013	-0.012	0.031	0.006	-0.01	-0.003	0.011	0.007	0.028	-0.002	-0.015	0.008	-0.006	-0.012	0.055
Atrioventricular block, complete	circulatory system	-0.01	0.005	-0.008	0.004	0.003	0.027	0.028	-0.007	-0.017	-0.008	-0.024	-0.017	-0.009	-0.011	0.001	0.003	-0.013	-0.012	-0.003	-0.013	-0.009	-0.01	-0.008	-0.008	-0.008	-0.007	-0.002	-0.011	-0.007	-0.011	-0.006	-0.008	-0.011	-0.005	-0.007	-0.007	0.025
Right bundle branch block	circulatory system	0.007	0.015	-0.007	0	0.006	0.016	0.038	-0.003	0.023	0.015	-0.035	-0.025	-0.008	-0.016	0.05	0.022	-0.017	0.026	-0.001	-0.011	-0.009	0.035	-0.007	-0.011	0.029	-0.002	0.005	0.005	0.025	0.001	0.011	-0.006	-0.009	0	0.012	-0.011	0.029
Left bundle branch block	circulatory system	0.001	0.015	-0.005	-0.005	-0.003	0.042	0.072	-0.004	0.007	-0.002	-0.032	-0.026	-0.012	-0.017	0.042	0.028	-0.014	0.026	0.011	-0.001	-0.014	0.022	-0.013	-0.012	0.016	0.002	-0.015	-0.016	-0.006	-0.008	0.01	-0.007	-0.014	0.007	0	-0.012	0.057
Abnormal electrocardiogram [ECG] [EKG]	circulatory system	0.045	0.061	0.035	0.074	0.06	0.065	0.064	0.031	0.06	0.017	-0.021	-0.033	0.025	-0.008	0.031	0.101	-0.007	0.062	0.042	0.034	-0.002	0.099	-0.015	-0.005	0.015	0.032	0.004	0.017	0.047	0.042	0.047	0.043	-0.017	0.051	0.059	-0.01	0.108
Cardiac pacemaker/device in situ	circulatory system	0.01	0.014	-0.003	0.015	0.004	0.013	0.039	-0.007	0.017	-0.008	-0.018	-0.016	-0.009	-0.011	0.009	0.012	-0.008	0.014	-0.01	0.009	-0.009	0.015	0	-0.008	0.001	0.007	-0.002	-0.003	0.002	0.002	0.004	-0.008	-0.011	0.009	-0.007	-0.007	0.056
Cardiac pacemaker in situ	circulatory system	-0.019	0.002	-0.016	0.005	0.015	0.012	0.062	-0.012	0.001	-0.015	-0.042	-0.03	-0.02	-0.02	0.033	0.018	-0.021	-0.006	-0.002	-0.012	-0.012	0.005	-0.015	-0.009	0.01	-0.006	-0.013	-0.009	-0.003	-0.009	0.005	0	-0.018	-0.001	-0.014	-0.013	0.062
Cardiac defibrillator in situ	circulatory system	-0.013	0.007	-0.01	0.017	0.006	0.03	0.035	-0.011	0.012	-0.008	-0.038	-0.027	-0.008	-0.018	0.008	0.008	-0.022	-0.001	-0.007	-0.006	-0.01	-0.01	-0.014	-0.007	0.003	0.008	-0.011	-0.012	-0.001	0.002	-0.004	-0.002	-0.015	0.007	-0.012	-0.012	0.087
Cardiac dysrhythmias	circulatory system	-0.011	-0.008	-0.014	-0.003	-0.008	0.018	0.049	-0.007	-0.023	-0.001	-0.026	-0.018	-0.001	-0.011	0.008	0.009	-0.014	0.003	-0.01	-0.018	-0.009	0.002	-0.009	-0.008	0.041	-0.004	-0.01	-0.016	-0.008	-0.005	-0.007	-0.008	-0.012	0.006	-0.008	-0.008	0.031
Paroxysmal supraventricular tachycardia	circulatory system	0.015	0.027	0.005	0.002	0	0.024	0.015	0.003	0.037	0.001	-0.032	-0.021	0.009	-0.015	0.024	0.048	-0.01	0.013	0.01	0.01	-0.006	0.036	-0.012	-0.01	0.003	0.017	-0.018	0.005	0	0.01	0.014	0.016	-0.013	0.005	0.004	-0.01	0.024
Paroxysmal ventricular tachycardia	circulatory system	-0.006	0.019	-0.005	0.022	0.011	0.028	0.022	-0.008	0.025	0.005	-0.041	-0.032	-0.012	-0.021	0.02	0.011	-0.013	0.008	0.006	0	-0.014	-0.004	-0.016	-0.006	-0.006	0.007	-0.014	-0.02	0.005	0.006	0.019	0.016	-0.013	0.032	0.004	-0.01	0.068
Atrial fibrillation	circulatory system	-0.01	-0.01	-0.02	0.019	0.019	0.038	0.102	-0.022	-0.012	-0.009	-0.085	-0.067	-0.022	-0.044	0.052	0.002	-0.042	0.004	-0.01	-0.035	-0.033	-0.007	-0.028	-0.029	0.025	-0.01	-0.03	-0.041	0	-0.016	0.009	-0.009	-0.044	-0.005	-0.007	-0.023	0.108
Atrial flutter	circulatory system	-0.01	-0.01	-0.025	0.011	0.007	0.004	0.066	-0.016	-0.01	-0.005	-0.049	-0.039	-0.016	-0.026	0.043	0.003	-0.029	0.003	-0.005	-0.027	-0.018	0.001	-0.02	-0.018	0.023	-0.01	-0.016	-0.013	-0.009	-0.022	0.011	-0.011	-0.027	-0.011	-0.006	-0.017	0.072
Other specified cardiac dysrhythmias	circulatory system	0.035	0.059	-0.001	0.036	0.044	0.067	0.088	0.003	0.045	0.011	-0.052	-0.048	0.009	-0.027	0.044	0.09	-0.019	0.059	0.022	0.018	-0.021	0.079	-0.02	-0.016	0.038	0.022	-0.013	-0.008	0.029	0.026	0.027	0.029	-0.032	0.046	0.003	0.001	0.099
Arrhythmia (cardiac) NOS	circulatory system	0.008	0.052	0.029	0.022	0.033	0.073	0.147	0.016	0.06	0.002	-0.051	-0.046	0.036	-0.03	0.063	0.05	-0.019	0.034	0.008	0.008	-0.02	0.056	-0.02	-0.017	0.044	0.047	-0.01	0.008	0.014	0.034	0.028	0.031	-0.031	0.039	0.032	-0.016	0.113
Premature beats	circulatory system	0.014	0.018	0.011	0.015	0.009	0.021	0.022	-0.011	0.03	0.007	-0.039	-0.035	-0.008	-0.022	0.008	0.046	-0.021	0.036	0.015	0.009	-0.014	0.037	-0.016	-0.006	0.013	0.004	-0.012	-0.013	0.016	0.004	0.021	0.012	-0.021	0.014	0.002	-0.017	0.046
Supraventricular premature beats	circulatory system	0.034	0.043	0.018	0.011	0.017	0.014	0.015	-0.002	0.034	0.007	-0.025	-0.023	-0.005	-0.01	0.02	0.032	-0.003	0.021	0.017	0.01	-0.012	0.038	0	0.009	0.015	0.005	0.008	-0.015	0.01	0.013	0.013	0.002	-0.007	-0.003	0.003	-0.01	0.038
Tachycardia NOS	circulatory system	0.022	0.061	0.055	0.058	0.06	0.106	0.149	0.023	0.107	0.031	0.002	-0.021	0.038	-0.011	0.03	0.08	-0.003	0.071	0.01	0.038	-0.008	0.079	0.001	0.002	0.005	0.059	0.021	0.02	0.052	0.068	0.04	0.059	-0.016	0.086	0.067	0.004	0.086
Sinoatrial node dysfunction (Bradycardia)	circulatory system	-0.009	-0.009	-0.019	-0.017	-0.011	0.03	0.051	-0.011	-0.01	-0.013	-0.034	-0.025	-0.014	-0.014	0.029	-0.005	-0.015	-0.016	-0.007	-0.014	-0.01	-0.009	-0.014	-0.012	0.019	-0.011	-0.015	-0.017	-0.012	-0.017	-0.004	-0.002	-0.019	-0.01	-0.012	0.005	0.033
Palpitations	circulatory system	0.038	0.076	0.057	0.025	0.024	0.019	0.028	-0.002	0.123	0.033	-0.06	-0.063	0.026	-0.035	0.023	0.115	-0.037	0.055	0.01	0.061	-0.028	0.076	0.004	-0.016	0.01	0.043	0.009	0.005	0.019	0.034	0.018	0.045	-0.04	0.021	0.01	-0.021	0.048
Congestive heart failure (CHF) NOS	circulatory system	-0.014	0.021	-0.002	0.018	0.013	0.089	0.159	-0.014	0.032	-0.011	-0.065	-0.05	-0.001	-0.027	0.059	0.059	-0.02	0.019	-0.006	-0.001	-0.023	0.041	-0.026	-0.018	0.021	0.016	-0.019	-0.035	0.015	0	0.032	0.013	-0.03	0.045	-0.005	-0.02	0.145
Heart failure NOS	circulatory system	-0.013	0.014	-0.003	0.004	-0.008	0.054	0.073	-0.013	0.017	-0.003	-0.041	-0.033	-0.004	-0.018	0.028	0.025	-0.018	0.003	-0.005	-0.006	-0.018	0.006	-0.016	-0.01	0.025	0.002	-0.003	-0.024	-0.01	-0.011	0.003	-0.007	-0.016	0.015	-0.015	-0.01	0.098
Heart failure with reduced EF [Systolic or combined heart failure]	circulatory system	-0.012	0.016	-0.009	0.012	-0.002	0.049	0.104	-0.016	0.014	-0.012	-0.049	-0.039	-0.009	-0.023	0.037	0.025	-0.022	0.001	-0.001	-0.005	-0.021	0.017	-0.02	-0.018	0.012	0.005	-0.015	-0.034	0.003	-0.008	0.025	0	-0.027	0.033	-0.01	-0.013	0.125
Heart failure with preserved EF [Diastolic heart failure]	circulatory system	-0.021	0.008	0.004	0.023	0.01	0.088	0.128	-0.009	0.032	0.011	-0.043	-0.035	0.002	-0.023	0.049	0.05	-0.01	0.014	-0.007	0.008	-0.019	0.045	-0.017	-0.016	0.031	0.011	-0.016	-0.024	0.011	-0.01	0.032	0.025	-0.018	0.049	0.006	-0.011	0.101
Heart transplant/surgery	circulatory system	-0.008	0.031	-0.006	0.005	0	0.022	0.022	-0.001	0.018	0.008	-0.02	-0.012	-0.003	-0.009	-0.01	0.029	-0.009	0.018	-0.002	-0.013	-0.006	0.011	-0.011	0.017	-0.003	0.045	0.005	-0.013	-0.002	-0.004	-0.001	-0.01	-0.006	0.013	-0.003	-0.01	0.024
Abnormal function study of cardiovascular system	circulatory system	0.004	0.013	-0.006	-0.002	-0.011	0.034	0.022	-0.004	-0.003	0.003	-0.042	-0.035	0.002	-0.023	0.016	0.026	-0.018	0.025	0.02	0.002	-0.019	-0.004	-0.018	-0.012	0.005	-0.006	-0.016	-0.006	0.016	-0.001	0.001	-0.004	-0.018	0.001	-0.007	-0.011	0.04
Symptoms involving cardiovascular system	circulatory system	0.019	0.038	0.01	0.021	0.001	0.054	0.06	0.005	0.038	-0.001	-0.032	-0.03	-0.011	-0.012	0.014	0.042	-0.018	-0.001	-0.002	0.016	-0.016	0.055	-0.011	-0.014	0.015	0.007	-0.004	-0.003	0.012	0.01	0.034	0.01	-0.021	0.018	0.017	-0.008	0.075
Cardiac complications, not elsewhere classified	circulatory system	-0.009	0.002	-0.006	0.002	-0.005	0.035	0.025	-0.006	-0.013	-0.007	-0.021	-0.014	-0.006	-0.009	-0.007	-0.008	-0.011	-0.009	-0.008	-0.012	-0.008	-0.007	0.002	-0.006	0.004	-0.013	-0.008	-0.012	0.004	-0.009	-0.006	-0.007	-0.01	-0.012	0.004	-0.006	0.028
Intracerebral hemorrhage	circulatory system	0.009	0.003	-0.008	0.015	0.014	0.064	0.099	-0.007	0.026	0.016	-0.009	-0.012	-0.004	-0.011	0.034	0.007	-0.003	0.005	0.004	-0.01	-0.009	0.008	-0.008	-0.008	0.07	0.02	-0.002	-0.004	-0.007	0.009	0.024	0.009	-0.011	0.018	0.01	0.002	0.031
Cerebrovascular disease	circulatory system	0.005	0.009	0.002	0.014	0.018	0.04	0.065	-0.008	0.022	0.005	-0.02	-0.019	0.005	-0.013	0.057	0.024	-0.002	0.003	-0.011	-0.002	-0.01	0.029	-0.01	-0.009	0.066	0.005	-0.011	-0.014	-0.008	-0.001	0.01	0.035	-0.003	0.011	-0.001	-0.008	0.034
Occlusion and stenosis of precerebral arteries	circulatory system	0.002	0.002	-0.017	-0.003	0.015	0.072	0.102	-0.012	0.009	-0.01	-0.055	-0.041	-0.022	-0.027	0.047	0.02	-0.018	0.009	-0.021	-0.013	-0.019	0.011	-0.021	-0.015	0.053	0.001	-0.017	-0.026	-0.007	-0.01	0.014	0.012	-0.021	-0.004	0.004	-0.014	0.137
Occlusion of cerebral arteries, with cerebral infarction	circulatory system	-0.009	0.004	-0.006	0.008	0.013	0.067	0.047	-0.006	-0.005	-0.007	-0.011	-0.014	-0.006	-0.009	0.003	-0.01	0	-0.014	-0.008	-0.013	-0.008	-0.006	-0.007	-0.007	0.043	0.012	-0.008	-0.013	0.004	-0.009	-0.006	0.013	-0.003	0.014	-0.007	0.004	0.048
Cerebral atherosclerosis	circulatory system	0.013	0	-0.012	0.007	-0.005	0.041	0.039	-0.006	0.007	0.002	-0.018	-0.015	-0.002	-0.01	0.03	0.019	-0.006	0.004	-0.009	-0.003	-0.008	0.016	-0.007	-0.007	0.041	0.001	0	-0.017	0.014	0.005	-0.006	0.012	-0.01	-0.003	-0.007	-0.007	0.052
Cerebral artery occlusion, with cerebral infarction	circulatory system	0.018	0.008	0.006	0.03	0.025	0.087	0.135	-0.005	0.022	0.009	-0.033	-0.036	-0.003	-0.021	0.07	0.032	-0.012	0.02	-0.008	-0.007	-0.013	0.035	-0.011	-0.004	0.056	0.027	-0.007	-0.017	0.005	0.01	0.039	0.027	-0.009	0.02	-0.004	-0.003	0.07
Transient cerebral ischemia	circulatory system	0.021	0.031	0.01	0.036	0.025	0.107	0.141	-0.004	0.037	0.002	-0.052	-0.046	0.004	-0.028	0.045	0.053	-0.019	0.023	-0.006	0.012	-0.022	0.058	-0.02	-0.018	0.057	0.023	-0.018	-0.017	0.035	0.026	0.044	0.039	-0.021	0.015	-0.001	-0.01	0.11
Cerebral aneurysm	circulatory system	0.03	0.004	-0.008	-0.001	-0.001	0.021	0.035	-0.007	0.023	-0.008	-0.008	-0.016	-0.008	-0.011	0.027	0.018	0.003	0.006	-0.009	0	-0.001	0.01	-0.008	-0.007	0.019	0.008	-0.009	-0.002	0.002	0.003	0.015	-0.008	-0.011	0.019	0.002	-0.007	0.023
Acute, but ill-defined cerebrovascular disease	circulatory system	0.004	0.026	0.005	0.017	0.002	0.08	0.052	-0.008	0.015	0.011	-0.012	-0.017	-0.004	-0.013	0.019	0.037	-0.003	0.012	-0.006	-0.001	-0.005	0.033	-0.003	-0.002	0.012	0.011	-0.005	-0.006	0.006	0.008	0.009	0.026	0.001	0.021	-0.009	-0.009	0.053
Late effects of cerebrovascular disease	circulatory system	0.022	0.033	0.005	0.038	0.032	0.1	0.142	0.002	0.043	0.024	-0.02	-0.023	0.007	-0.013	0.07	0.045	0.006	0.01	-0.006	0.005	-0.004	0.057	-0.008	0.011	0.072	0.034	0.009	-0.013	0.03	0.021	0.043	0.048	0.001	0.037	0.006	0.012	0.061
Atherosclerosis	circulatory system	0.002	0.008	0.005	-0.002	0.012	0.04	0.021	-0.007	0.018	-0.008	-0.022	-0.017	-0.01	-0.011	0.008	0.022	-0.014	0.003	0.003	0.003	-0.009	0.017	-0.009	-0.008	0	-0.007	0.004	-0.004	-0.008	-0.005	-0.007	0.024	-0.006	0.002	0.001	-0.008	0.065
Atherosclerosis of renal artery	circulatory system	-0.001	0.015	-0.006	0.009	0.002	0.044	0.043	0.006	0.004	0.003	-0.021	-0.014	-0.006	-0.002	0.013	0.002	-0.011	0.006	0.008	-0.005	-0.008	-0.005	0.002	-0.006	0.024	-0.003	-0.008	0.003	0.004	-0.001	-0.006	0.003	-0.01	-0.002	0.004	-0.006	0.047
Atherosclerosis of the extremities	circulatory system	0.002	-0.016	-0.009	0.013	0.017	0.053	0.083	-0.007	0.013	-0.001	-0.026	-0.018	-0.01	-0.011	0.016	0.003	-0.014	0.003	-0.01	-0.003	-0.009	0.006	-0.009	-0.008	0.016	-0.004	0.004	-0.018	-0.008	-0.011	0.003	0	-0.012	0.011	0	-0.008	0.113
Atherosclerosis of native arteries of the extremities with intermittent claudication	circulatory system	0.008	-0.002	-0.009	0.023	0.022	0.023	0.048	-0.008	0.001	-0.01	-0.028	-0.021	0.006	-0.014	0.003	0.019	-0.009	-0.001	0.004	-0.011	-0.011	0.012	-0.011	-0.01	-0.01	-0.005	0	-0.014	0.005	0.002	0	0.037	-0.015	0.014	-0.002	-0.009	0.114
Atherosclerosis of aorta	circulatory system	-0.003	0.012	0.003	0.032	0.023	0.01	0.037	-0.01	0.023	-0.002	-0.033	-0.025	0.001	-0.017	0.005	0.04	-0.017	0.003	-0.006	-0.012	-0.014	0.041	-0.013	-0.012	0.011	0.006	-0.009	0.013	0.001	0.005	0.004	0.016	-0.018	0.02	0.018	-0.011	0.1
Aortic aneurysm	circulatory system	-0.005	-0.01	-0.007	0.036	0.04	0.012	0.04	0.001	-0.009	0.001	-0.026	-0.025	-0.005	-0.018	0.012	0.007	-0.013	0.011	0.005	-0.009	-0.015	0.003	-0.009	-0.007	0.019	0.004	-0.015	-0.009	0.021	-0.002	0.014	0.002	-0.016	0.015	0.02	-0.012	0.044
Abdominal aortic aneurysm	circulatory system	-0.004	-0.007	-0.006	0.013	0.016	0.038	0.053	-0.001	-0.005	0.002	-0.032	-0.022	0	-0.014	0.009	0.011	-0.018	0.01	-0.002	-0.011	-0.012	0.002	-0.005	-0.01	0.016	-0.007	-0.012	-0.02	0.004	-0.004	-0.009	-0.01	-0.015	0.012	0.01	-0.01	0.103
Raynaud's syndrome	circulatory system	0.014	0.014	0.011	0.003	0.006	-0.002	-0.007	-0.009	0.024	-0.005	-0.006	-0.02	-0.012	-0.006	-0.005	0.033	-0.015	0.008	-0.008	0.007	-0.007	0.022	0	-0.011	0.002	-0.008	0.003	0.006	0.016	0.013	-0.002	0.008	-0.016	0	0.002	-0.004	-0.001
Peripheral vascular disease, unspecified	circulatory system	0.002	0.012	-0.005	0.026	0.028	0.077	0.107	-0.012	0.023	-0.016	-0.047	-0.039	-0.009	-0.026	0.059	0.046	-0.016	0.017	-0.011	-0.003	-0.021	0.039	-0.02	-0.018	0.031	0.01	0	-0.013	0.011	0	0.007	0.037	-0.019	0.034	0.017	-0.013	0.177
Arteritis NOS	circulatory system	-0.001	0.005	-0.006	-0.004	-0.005	0.017	0.024	0.006	-0.002	0.002	-0.014	-0.014	0.005	-0.009	0.022	0.012	-0.006	0.001	-0.008	-0.012	-0.008	0.014	-0.007	-0.007	0.003	0.007	-0.008	-0.004	0.015	0.013	0.006	0.013	-0.003	0.014	0.004	-0.006	0.012
Other disorders of arteries and arterioles	circulatory system	-0.014	-0.004	-0.007	0.016	0.007	0.021	0.025	-0.009	0.014	-0.005	-0.024	-0.022	-0.004	-0.01	-0.011	0.022	-0.002	0.01	0.003	0	-0.012	0.021	-0.011	0.003	0.022	0.009	-0.002	-0.004	-0.003	-0.009	-0.001	-0.004	-0.007	0.012	-0.01	-0.01	0.066
Stricture of artery	circulatory system	-0.001	0.002	0	0.002	-0.005	0.027	0.037	-0.006	0.026	-0.007	-0.014	-0.014	-0.012	-0.009	0.003	0.007	-0.011	0.006	0	0.003	-0.008	0.021	-0.007	-0.006	-0.007	-0.003	0.001	-0.003	-0.006	0.006	-0.006	0.043	-0.01	0.004	0.004	-0.006	0.073
Aortic ectasia	circulatory system	0.007	-0.002	-0.014	0.034	0.032	0.039	0.042	-0.001	-0.001	0.002	-0.018	-0.009	0.001	-0.009	0.009	0.012	0.002	0.018	0.009	-0.003	-0.012	0.02	-0.011	0.004	0.01	0.017	-0.007	0.009	0.011	-0.009	-0.001	0.003	-0.006	0.009	0.004	0.004	0.045
Disease of capillaries	circulatory system	-0.003	0.035	0.004	0.018	0.011	-0.001	-0.007	-0.006	0.027	0.001	-0.01	-0.015	-0.013	-0.01	-0.007	0.033	-0.007	-0.002	0.013	0.012	-0.008	0.034	0.001	-0.007	-0.007	0.033	-0.009	0.011	0.003	-0.003	-0.006	0.002	-0.004	0.006	0.002	-0.007	0.015
Noninfectious disorders of lymphatic channels	circulatory system	0.007	0.026	-0.006	0.008	0.01	0.006	0.022	-0.003	0.02	-0.001	-0.028	-0.022	0.013	-0.012	-0.006	0.035	-0.009	0.03	0.014	-0.002	-0.003	0.034	-0.012	-0.005	0.006	0.007	-0.004	0.008	0.008	-0.003	-0.01	-0.006	-0.009	0	0.007	-0.011	0.027
Phlebitis and thrombophlebitis	circulatory system	0.002	0.018	0.024	0.029	0.027	0.032	0.035	0.002	0.025	0.007	-0.009	-0.018	0.013	-0.006	0.008	0.032	-0.009	0.023	0.009	0.02	-0.009	0.033	-0.001	-0.008	0.008	0.009	0.004	0.014	0.018	0.013	0.013	0.016	-0.012	0.037	0.017	-0.008	0.025
Phlebitis and thrombophlebitis of lower extremities	circulatory system	-0.006	0.026	0.004	0.008	0.028	0.036	0.036	0.003	0.029	-0.012	-0.024	-0.025	-0.001	-0.008	0	0.049	-0.02	0.041	0.018	-0.004	-0.013	0.016	-0.002	-0.011	0.024	0.004	0.006	-0.009	-0.005	0.006	0.025	0.011	-0.009	0.031	0.007	-0.011	0.033
Other venous embolism and thrombosis	circulatory system	0.023	0.034	0.012	0.035	0.044	0.087	0.123	0.005	0.036	0.022	-0.043	-0.04	0.022	-0.024	0.034	0.072	-0.023	0.043	0.029	0.009	-0.022	0.056	-0.003	-0.015	0	0.027	0.008	0.005	0.021	0.037	0.036	0.035	-0.02	0.045	0.027	-0.014	0.084
Deep vein thrombosis [DVT]	circulatory system	0.01	0.027	-0.004	0.019	0.024	0.062	0.115	-0.009	0.021	0.002	-0.034	-0.035	0.008	-0.02	0.02	0.047	-0.021	0.028	0.016	-0.011	-0.019	0.03	-0.006	-0.016	0.005	0.016	0.012	-0.005	0.02	0.027	0.001	0.02	-0.019	0.036	0.005	-0.011	0.067
Varicose veins of lower extremity	circulatory system	0.014	0.029	0.001	0.005	0.01	0.002	-0.001	-0.005	0.018	0.001	-0.03	-0.028	-0.003	-0.018	0.022	0.035	-0.022	0.018	0.029	-0.01	-0.015	0.015	-0.005	-0.013	-0.013	0.003	-0.011	0.027	-0.007	-0.003	0.013	0.007	-0.019	-0.008	0.003	-0.012	0.028
Varicose veins of lower extremity, symptomtic	circulatory system	0.011	0.017	0.006	0.002	0.018	0.032	0.019	0.004	0.02	-0.001	-0.031	-0.03	-0.001	-0.013	0.018	0.038	-0.016	0.022	0.032	-0.005	-0.016	0.016	-0.002	-0.014	-0.004	-0.001	-0.001	0.019	0.012	0.002	0.011	0.005	-0.018	0.02	0.001	-0.013	0.027
Hemorrhoids	circulatory system	0.055	0.068	0.006	0.021	0.028	0.021	0.012	-0.004	0.048	0.009	-0.073	-0.066	0	-0.034	0.011	0.086	-0.048	0.058	0.008	0.016	-0.033	0.066	-0.026	-0.028	0.03	0.006	-0.014	0.018	0.017	0.001	0.003	0.019	-0.044	0.015	0.002	-0.024	0.079
Chronic venous insufficiency [CVI]	circulatory system	-0.006	0.008	-0.005	0.021	0.019	0.032	0.056	-0.006	0.019	-0.009	-0.033	-0.029	0.002	-0.019	0.011	0.043	-0.011	0.029	0.036	0.003	-0.015	0.044	-0.014	-0.013	0.002	0.013	0.001	0.009	0.009	0.004	0.007	0.026	-0.02	0.016	0.003	-0.007	0.063
Encounter for long-term (current) use of antiplatelets/antithrombotics	circulatory system	0.013	0.001	0.004	0.012	0.006	0.051	0.048	-0.007	0.017	0.006	-0.023	-0.018	0.008	-0.012	0.023	0.038	-0.014	0.014	-0.004	0.016	-0.01	0.036	-0.009	-0.008	0.016	0.012	-0.003	-0.012	0.001	-0.005	0.012	0.015	-0.007	0.027	0	-0.008	0.088
Encounter for long-term (current) use of aspirin	circulatory system	0.025	0.037	0.011	0.041	0.036	0.081	0.157	0.011	0.071	0.002	-0.055	-0.046	0.012	-0.03	0.038	0.089	-0.02	0.059	0.022	0.016	-0.025	0.092	-0.017	-0.021	0.03	0.028	-0.007	0.013	0.031	0.011	0.043	0.045	-0.03	0.052	0.039	-0.017	0.209
Orthostatic hypotension	circulatory system	0.03	0.033	0.017	0.04	0.041	0.102	0.09	0.008	0.053	0.045	-0.012	-0.026	0.025	-0.009	0.057	0.096	-0.008	0.036	0.02	0.03	0	0.077	-0.013	-0.006	0.032	0.049	0.022	-0.012	0.052	0.032	0.062	0.031	-0.007	0.054	0.022	0.006	0.057
Hypotension NOS	circulatory system	0.001	0.051	0.006	0.052	0.044	0.109	0.205	-0.003	0.047	0.001	-0.045	-0.04	0.021	-0.021	0.042	0.082	-0.012	0.036	0	0.008	-0.022	0.054	-0.02	-0.015	0.022	0.037	0.002	-0.021	0.029	0.024	0.063	0.028	-0.02	0.079	0.005	-0.01	0.143
Circulatory disease NEC	circulatory system	0.028	0.036	0.022	0.035	0.024	0.079	0.095	0.016	0.047	0.016	-0.017	-0.026	0.01	-0.013	0.038	0.058	0.001	0.046	0.011	0.016	-0.015	0.065	-0.001	-0.007	0.019	0.03	0.01	0.013	0.017	0.023	0.058	0.026	-0.003	0.032	0.02	0.012	0.101
Acute sinusitis	respiratory	0.083	0.162	0.073	0.017	0.015	0.016	0.011	0.037	0.169	0.019	0.058	-0.001	0.057	0.044	-0.001	0.176	0.021	0.053	0.039	0.14	0.019	0.159	0.067	0.018	0.003	0.066	0.018	0.107	0.041	0.059	0.003	0.065	0.023	0.047	0.013	0.015	0.123
Acute upper respiratory infections of multiple or unspecified sites	respiratory	0.101	0.184	0.095	0.048	0.028	0.031	0.013	0.038	0.169	0.034	0.108	0.05	0.067	0.085	0.009	0.174	0.082	0.102	0.072	0.118	0.053	0.164	0.066	0.029	0.011	0.072	0.01	0.187	0.058	0.058	0.044	0.044	0.07	0.042	0.038	0.055	0.091
Acute pharyngitis	respiratory	0.072	0.165	0.08	0.031	0.022	0.011	-0.018	0.046	0.136	0.043	0.135	0.057	0.058	0.087	-0.011	0.143	0.072	0.075	0.057	0.103	0.062	0.134	0.1	0.026	-0.013	0.067	0.033	0.185	0.059	0.04	0.021	0.036	0.05	0.049	0.046	0.048	0.041
Septal Deviations/Turbinate Hypertrophy	respiratory	0.012	0.01	0.01	0.014	0.005	0.015	0.005	0.007	0.029	0.018	-0.006	-0.031	0.021	-0.002	0.001	0.061	-0.021	0.014	-0.003	0.009	-0.014	0.034	-0.005	-0.009	0.006	0.031	-0.015	-0.003	0.02	0.019	0.004	0.016	-0.016	0.014	0.003	-0.013	0.032
Nasal polyps	respiratory	-0.005	-0.01	-0.001	-0.004	-0.004	-0.003	-0.01	-0.007	-0.008	-0.002	-0.016	-0.003	-0.011	-0.012	-0.001	0.001	-0.005	0.001	-0.004	-0.011	-0.01	-0.014	0.005	0.007	-0.008	-0.009	-0.01	0.019	-0.008	0	-0.007	0.007	-0.002	-0.016	-0.008	-0.008	-0.002
Chronic pharyngitis and nasopharyngitis	respiratory	0.046	0.061	0.046	0.028	0.013	0.021	0.019	0.02	0.099	0.027	0.016	0.01	0.041	0.022	0.023	0.1	0.019	0.049	0.017	0.052	0.006	0.076	0.005	0.007	0.025	0.045	0.002	0.011	0.061	0.032	0.015	0.048	0.02	0.023	0.014	0.002	0.03
Diseases of the larynx and vocal cords	respiratory	0	0.015	0.017	0.029	0.027	0.029	0.014	-0.002	0.035	0.018	0.02	-0.012	0.019	0.011	-0.005	0.046	0.007	0.019	0.006	0.021	0.003	0.025	-0.001	-0.005	-0.005	0.013	0.018	0.007	0.022	0.021	0.005	0.007	0.009	0.029	0.015	0.002	0.042
Voice disturbance	respiratory	0.027	0.043	0.037	0.02	0.023	0.039	0.032	0.013	0.05	0.032	0.004	-0.013	0.007	0.003	0.034	0.072	0.014	0.044	0.034	0.027	0.019	0.055	-0.014	0	0.02	0.023	0.007	0.02	0.053	0.01	0.01	0.027	0.019	0.025	0.017	0.014	0.051
Acute tonsillitis	respiratory	0.002	0.017	0.01	-0.013	-0.008	-0.009	-0.014	0.012	0.013	0	0.089	0.027	0.005	0.043	-0.008	0.011	0.055	-0.009	0.01	0.016	0.034	0.012	0.007	0.026	-0.008	0.023	0.018	0.039	-0.008	0.008	-0.007	-0.008	0.045	-0.006	-0.008	0.036	0
Chronic tonsillitis and adenoiditis	respiratory	0.004	0.002	0.017	-0.016	-0.017	0.012	-0.002	0.038	0.032	0.018	0.238	0.19	0.008	0.148	-0.003	-0.008	0.171	-0.013	0.02	0.021	0.117	-0.005	0.033	0.098	-0.011	0.038	0.019	0.092	-0.005	0.012	0.003	-0.007	0.149	-0.005	0.013	0.098	-0.023
Chronic sinusitis	respiratory	0.07	0.099	0.06	0.048	0.042	0.028	0.028	0.014	0.109	0.022	-0.005	-0.035	0.033	-0.005	0.018	0.135	-0.013	0.092	0.021	0.063	-0.013	0.124	0.017	-0.013	0.022	0.055	0.003	0.046	0.069	0.053	0.022	0.067	0	0.045	0.012	-0.004	0.055
Postnasal drip	respiratory	0.006	0.013	0.005	-0.004	-0.001	-0.001	0.006	-0.001	0.031	0.001	-0.001	-0.007	0.015	0.004	0.002	0.033	-0.002	0.016	0.008	0.012	-0.001	0.039	-0.011	-0.01	0.016	0.013	-0.012	0.009	0.018	0.015	-0.009	0.002	-0.011	-0.006	-0.003	0.004	0.009
Allergic rhinitis	respiratory	0.05	0.099	0.049	0.027	0.018	0.027	0.014	0.03	0.122	0.034	0.108	0.065	0.054	0.081	0.006	0.119	0.078	0.078	0.033	0.096	0.045	0.097	0.015	0.025	0.03	0.057	0.03	0.116	0.051	0.046	0.005	0.039	0.068	0.021	0.015	0.051	0.021
Epistaxis or throat hemorrhage	respiratory	0.022	0.041	0.018	0.002	-0.005	0.028	0.042	0.01	0.042	0.013	0.056	0.018	0.032	0.025	-0.005	0.043	0.033	0.003	0.009	0.025	0.038	0.039	0.003	0.001	0.015	0.039	-0.001	0.037	0.027	0.006	0.022	0.028	0.022	0.028	0.006	0.007	0.047
Throat pain	respiratory	0.011	0.02	0.014	0.017	0.022	0.015	0.02	-0.006	0.037	0.01	-0.007	-0.007	0.008	-0.004	-0.007	0.039	-0.007	0.02	-0.002	0.005	0.007	0.036	0.001	-0.007	0.011	0.042	-0.009	0.005	0.003	0.017	0.037	0.029	-0.011	0.025	0.002	-0.007	0.026
Other upper respiratory disease	respiratory	0.063	0.088	0.057	0.037	0.045	0.039	0.047	0.045	0.091	0.039	0.003	0.006	0.024	0.029	0.017	0.104	0.029	0.077	0.029	0.062	0.001	0.109	-0.005	0.014	0.03	0.041	0.004	0.038	0.055	0.051	0.027	0.054	0.037	0.038	0.02	-0.002	0.077
Pneumonia	respiratory	0.027	0.064	0.028	0.031	0.035	0.083	0.158	0.014	0.093	0.019	0.007	0.006	0.037	0.019	0.033	0.107	0.036	0.078	0.009	0.035	0.022	0.097	-0.024	0.021	0.038	0.046	0.013	0.054	0.038	0.042	0.049	0.021	0.024	0.056	0.025	0.021	0.115
Bacterial pneumonia	respiratory	-0.009	0.033	0.014	0.018	0.013	0.051	0.104	0.012	0.044	0.024	0.019	0.013	0.016	0.021	0.001	0.037	0.029	0.014	0.021	0.025	0.02	0.042	0	0.027	0.021	0.03	-0.002	0.03	0.029	0.013	-0.002	0.014	0.009	0.046	0.022	0.022	0.058
Influenza	respiratory	0.029	0.045	0.014	0	-0.008	0.011	0.022	0.003	0.059	0.026	0.019	-0.006	0.015	0.005	0.011	0.044	0.011	0.032	0.013	0.033	0.022	0.053	0.014	0	0.006	0.016	-0.004	0.041	0.026	0.018	0.011	0.017	0.002	0.012	0.03	0.007	0.032
Acute bronchitis and bronchiolitis	respiratory	0.09	0.13	0.064	0.051	0.037	0.016	0.039	0.016	0.127	0.029	0.019	0.004	0.046	0.019	0.017	0.166	0.027	0.068	0.041	0.089	0.007	0.149	0.013	0.003	0.017	0.037	-0.003	0.063	0.051	0.04	0.027	0.049	0.033	0.044	0.014	0.002	0.128
Asthma	respiratory	0.058	0.09	0.038	0.03	0.02	0.036	0.029	0.04	0.119	0.031	0.128	0.049	0.093	0.079	0.003	0.119	0.078	0.058	0.059	0.078	0.065	0.12	0.039	0.038	0.014	0.06	0.021	0.092	0.047	0.078	0.036	0.045	0.061	0.049	0.046	0.044	0.048
Chronic obstructive asthma	respiratory	0.015	0.027	0.015	0.03	0.028	0.061	0.061	0.003	0.037	0	-0.019	-0.017	0.005	-0.005	0.041	0.045	-0.004	0.04	0.01	0.016	-0.009	0.047	-0.009	-0.008	0.017	0.023	-0.003	0.006	0.019	0.026	0.072	0.058	-0.012	0.043	0.009	0.001	0.08
Asthma with exacerbation	respiratory	0.045	0.068	0.04	0.017	0.024	0.028	0.005	0.047	0.096	0.022	0.124	0.056	0.062	0.082	-0.001	0.073	0.086	0.051	0.053	0.078	0.077	0.073	0.034	0.045	-0.004	0.042	0.021	0.104	0.056	0.05	0.028	0.032	0.059	0.034	0.039	0.044	0.01
Chronic airway obstruction	respiratory	0.015	0.043	0.033	0.085	0.07	0.053	0.118	0.003	0.071	0.007	-0.05	-0.039	0.02	-0.019	0.034	0.095	-0.015	0.035	-0.002	0.032	-0.014	0.079	-0.018	-0.018	0.042	0.025	-0.013	-0.014	0.026	0.029	0.038	0.041	-0.026	0.082	0.015	-0.014	0.295
Emphysema	respiratory	0.001	0.037	0.02	0.041	0.036	0.043	0.095	0.011	0.049	-0.005	-0.032	-0.029	-0.002	-0.015	0.035	0.066	-0.011	0.03	-0.005	0.027	-0.007	0.057	-0.015	-0.013	0.046	0.029	-0.004	-0.002	0.008	0.018	0.024	0.016	-0.013	0.057	0.017	-0.013	0.21
Chronic bronchitis	respiratory	0.004	0.018	0.019	0.018	0.016	0.015	0.026	-0.006	0.048	0.001	-0.013	-0.007	0.018	0.003	0.011	0.041	-0.007	0.016	-0.002	0.022	-0.008	0.036	-0.008	0.002	0.039	0.033	-0.001	0	-0.007	0.017	0.016	0.038	-0.005	0.031	0.012	0.012	0.074
Obstructive chronic bronchitis	respiratory	0.016	0.058	0.047	0.068	0.065	0.044	0.116	0.008	0.069	-0.003	-0.034	-0.027	0.026	-0.014	0.055	0.094	-0.012	0.047	0.006	0.039	-0.01	0.091	-0.014	-0.012	0.041	0.016	-0.006	0.001	0.028	0.026	0.053	0.061	-0.015	0.071	0.015	-0.006	0.214
Bronchiectasis	respiratory	0.003	0.034	0.019	0.002	0.001	0.029	0.056	-0.001	0.04	-0.004	-0.024	-0.021	0.009	-0.014	0.023	0.032	-0.013	0.013	0.004	0.025	-0.006	0.037	-0.011	-0.01	0.024	0.019	-0.012	0.015	0.005	0.007	0	0.023	-0.01	0.014	0.004	-0.009	0.026
Bronchitis	respiratory	0.067	0.118	0.058	0.045	0.032	0.026	0.034	0.022	0.116	0.023	-0.013	-0.03	0.051	-0.003	0.034	0.122	-0.012	0.049	0.04	0.08	-0.003	0.118	0.006	-0.002	0.027	0.038	0.006	0.057	0.054	0.056	0.039	0.064	-0.01	0.05	0.025	-0.004	0.125
Acute bronchospasm	respiratory	0.054	0.038	0.025	0.003	0.003	0.005	0.007	0.012	0.04	0.016	-0.008	-0.009	-0.009	0.001	0.017	0.056	-0.009	0.033	0.044	0.013	-0.009	0.046	-0.009	0.001	0.001	0.006	-0.002	0.014	0.019	-0.005	0.023	0.009	0	-0.006	0.001	-0.008	0.026
Pneumonitis due to inhalation of food or vomitus	respiratory	0.004	0.037	-0.002	0.052	0.056	0.061	0.118	0.004	0.03	0.001	-0.01	-0.003	0.028	-0.004	0.037	0.054	0.025	0.025	0.005	0.015	-0.001	0.031	-0.008	0.021	0.011	0.042	0.007	0.007	0.003	0.017	0.037	0.011	0.002	0.065	0.002	-0.007	0.065
Postinflammatory pulmonary fibrosis	respiratory	-0.005	0.03	0.005	0.017	-0.005	0.057	0.035	0.001	0.011	-0.003	-0.029	-0.02	-0.002	-0.01	0.023	0.038	-0.006	0.017	0.005	-0.005	-0.006	0.032	-0.014	-0.007	0.008	0.004	0.002	0.003	0.01	0.006	0.008	0.023	-0.012	0.004	0.004	0.01	0.057
Pulmonary congestion and hypostasis	respiratory	-0.004	0.028	0.008	0.043	0.017	0.121	0.182	0.008	0.041	0.003	-0.033	-0.024	0.003	-0.005	0.031	0.03	-0.001	0.007	0.002	0.002	-0.009	0.026	-0.008	-0.001	0.01	0.024	-0.005	-0.015	0	0.008	0.022	0.015	-0.014	0.054	-0.006	-0.006	0.093
Other alveolar and parietoalveolar pneumonopathy	respiratory	-0.01	0.009	0.002	-0.001	-0.002	0.013	0.034	0.004	0.007	-0.008	-0.021	-0.012	-0.004	-0.004	-0.008	0.003	-0.008	0.01	-0.002	0	-0.001	-0.004	-0.008	0.001	0.001	0.012	-0.009	0.002	0.002	0.009	0.014	0.001	-0.011	0.019	0.002	0.002	0.026
Other pulmonary inflamation or edema	respiratory	0.008	0.019	0.005	0.008	0.007	0.04	0.085	-0.007	0.018	-0.008	-0.014	-0.013	-0.005	-0.005	0.008	0.03	-0.004	0.015	-0.01	0.003	-0.002	0.023	-0.009	0.001	0.009	-0.003	-0.01	0.001	0.01	0.001	0.042	0.016	-0.012	0.016	-0.008	-0.008	0.057
Empyema and pneumothorax	respiratory	-0.009	0.023	0.002	0.022	0.021	0.051	0.068	-0.005	0.027	-0.009	-0.033	-0.028	0.003	-0.018	-0.008	0.031	-0.013	0.021	-0.012	-0.017	-0.015	0.017	-0.014	-0.013	0.008	0.028	-0.015	-0.013	-0.007	0.009	0.014	0.002	-0.016	0.037	0.004	-0.012	0.073
Pleurisy; pleural effusion	respiratory	0	0.034	0.009	0.041	0.029	0.092	0.188	0.007	0.044	0	-0.055	-0.047	0.006	-0.025	0.036	0.057	-0.016	0.041	0.001	-0.011	-0.025	0.043	-0.02	-0.011	0.039	0.026	-0.014	-0.023	0.006	0.007	0.036	0.005	-0.029	0.053	0.013	-0.016	0.139
Pulmonary collapse; interstitial and compensatory emphysema	respiratory	0.001	0.026	0.002	0.028	0.019	0.123	0.196	-0.009	0.039	-0.008	-0.062	-0.05	0.004	-0.031	0.018	0.068	-0.013	0.046	0.002	-0.022	-0.024	0.047	-0.022	-0.016	0.037	0.029	-0.021	-0.012	0.006	0.013	0.022	0.021	-0.028	0.059	0.019	-0.012	0.153
Respiratory failure	respiratory	-0.005	0.04	0.019	0.067	0.055	0.155	0.264	0.011	0.057	0.012	-0.037	-0.02	0.012	-0.004	0.034	0.07	0.008	0.037	-0.003	-0.001	-0.007	0.058	-0.017	0.006	0.031	0.036	0.002	-0.012	0.016	0.029	0.032	0.03	-0.006	0.095	0.015	0.003	0.132
Respiratory insufficiency	respiratory	-0.008	0.011	-0.014	0.009	0.004	0.079	0.086	-0.009	0.008	0.002	-0.031	-0.018	0.001	-0.014	0.003	0.029	-0.013	0.011	-0.002	-0.015	-0.012	0.004	-0.011	-0.003	0.01	0.031	-0.001	-0.026	-0.009	-0.009	-0.001	-0.004	-0.015	0.017	-0.01	-0.01	0.059
Pulmonary insufficiency or respiratory failure following trauma and surgery	respiratory	-0.011	0.001	-0.004	0.008	0.007	0.075	0.085	-0.007	0.013	-0.008	-0.025	-0.013	0	-0.011	0.024	0.02	0.001	0.024	-0.01	-0.014	-0.009	0.013	-0.009	0.001	0.009	0.014	-0.003	-0.003	0.001	-0.011	0.003	0.008	-0.012	0.025	0.001	-0.008	0.052
Dependence on respirator [Ventilator] or supplemental oxygen	respiratory	-0.012	0.033	0.005	0.031	0.02	0.075	0.117	0	0.059	0.004	-0.017	0.001	0.012	-0.003	0.012	0.038	0.018	0.012	-0.006	0.023	0.002	0.041	-0.01	0.013	0.02	0.037	0.001	0.002	0.006	0.014	0.044	0.019	0.006	0.037	-0.002	0.014	0.086
Other diseases of lung	respiratory	0.007	0.033	0.004	0.032	0.04	0.062	0.101	-0.001	0.048	0.01	-0.048	-0.04	0.007	-0.024	0.012	0.084	-0.023	0.063	0.002	-0.007	-0.016	0.06	-0.024	-0.009	0.022	0.027	-0.008	0.008	0.019	0.024	0.034	0.023	-0.027	0.043	0.018	-0.02	0.127
Wheezing	respiratory	0.019	0.054	0.043	0.028	0.015	0.048	0.051	0.05	0.076	0.023	0.089	0.071	0.03	0.071	0.02	0.057	0.093	0.036	0.011	0.057	0.038	0.074	0.001	0.009	0.026	0.027	0.02	0.096	0.029	0.03	0.042	0.057	0.074	0.04	0.014	0.029	0.066
Painful respiration	respiratory	0.086	0.099	0.039	0.058	0.045	0.044	0.055	0.012	0.083	0.038	-0.027	-0.035	0.03	-0.024	0.017	0.096	-0.018	0.055	0.01	0.054	-0.017	0.111	0.007	-0.017	0.015	0.045	-0.014	0.014	0.046	0.044	0.061	0.049	-0.018	0.055	0.012	-0.008	0.117
Shortness of breath	respiratory	0.033	0.08	0.038	0.057	0.054	0.1	0.175	0.014	0.12	0.035	-0.084	-0.081	0.042	-0.045	0.045	0.161	-0.039	0.081	0.021	0.039	-0.037	0.132	-0.02	-0.028	0.056	0.061	-0.007	-0.034	0.044	0.057	0.047	0.049	-0.049	0.092	0.031	-0.03	0.191
Cough	respiratory	0.085	0.163	0.075	0.08	0.062	0.067	0.101	0.026	0.16	0.039	0.016	-0.017	0.058	0.017	0.02	0.222	0.025	0.119	0.033	0.1	0.005	0.19	0	0.002	0.04	0.072	0.008	0.107	0.061	0.05	0.046	0.055	0.024	0.067	0.047	0.021	0.147
Other dyspnea	respiratory	0.057	0.104	0.054	0.065	0.057	0.08	0.112	0.024	0.108	0.028	-0.034	-0.037	0.035	-0.015	0.022	0.172	-0.001	0.094	0.05	0.059	-0.013	0.146	-0.029	-0.004	0.038	0.053	-0.001	0.04	0.048	0.04	0.04	0.041	-0.003	0.051	0.03	-0.014	0.152
Abnormal findings examination of lungs	respiratory	0.016	0.053	0.027	0.062	0.058	0.077	0.177	0.003	0.076	0.005	-0.063	-0.059	0.022	-0.037	0.03	0.078	-0.029	0.045	-0.006	0.014	-0.028	0.097	-0.025	-0.022	0.04	0.035	-0.014	0.007	0.028	0.025	0.038	0.025	-0.036	0.062	0.002	-0.018	0.19
Abnormal results of function study of pulmonary system	respiratory	-0.005	0.015	0.013	-0.009	0.001	0.023	0.004	-0.007	0.024	0.006	-0.024	-0.014	-0.015	-0.012	-0.001	0.028	-0.015	0.013	-0.004	0.012	-0.01	0.032	-0.002	-0.008	0.007	0.003	0.003	0.007	0.009	0.012	-0.007	0.007	-0.013	0.005	-0.008	-0.008	0.017
Solitary pulmonary nodule	respiratory	0.026	0.039	0.013	0.029	0.019	0.021	0.04	-0.001	0.036	0.024	-0.037	-0.037	0.011	-0.024	0.006	0.057	-0.024	0.007	0.004	0.024	-0.016	0.062	-0.018	-0.017	-0.001	0.014	-0.004	0.031	0.005	0.012	0.019	0.014	-0.025	0.03	0	-0.016	0.143
Hemoptysis	respiratory	0.005	0.022	0.006	0.028	0.031	0.052	0.072	-0.008	0.032	-0.009	-0.011	-0.016	0.001	-0.007	-0.002	0.057	-0.002	0.017	0.006	0.016	-0.01	0.042	-0.01	-0.009	0.006	0.016	-0.011	-0.004	0.023	0.004	0.019	0.049	-0.008	0.034	0.029	0.007	0.08
Other diseases of respiratory system, NEC	respiratory	0.005	0.032	0.006	0	0.013	0.047	0.012	0.044	0.032	0.005	0.049	0.06	0.018	0.031	0.006	0.026	0.082	0.04	0.025	0.034	0.022	0.023	-0.003	0.06	-0.009	0.04	0.027	0.037	0.031	0.038	0.001	0.013	0.058	0.023	0.022	0.015	0.001
Symptoms involving respiratory system and other chest symptoms	respiratory	0.023	0.045	0.016	0.009	0.005	0.02	0.053	-0.004	0.034	0.003	-0.025	-0.031	0.021	-0.011	0	0.051	-0.013	0.024	0.003	0.021	-0.008	0.05	-0.002	-0.012	0.014	0.015	0.002	-0.008	0.029	0.012	0.021	0.046	-0.018	0.021	0.006	-0.011	0.096
Disorders of tooth development	digestive	-0.009	-0.007	-0.006	-0.01	-0.005	-0.008	-0.011	0.041	0.007	0.022	0.066	0.087	0	0.056	-0.007	0.009	0.091	0.016	0.04	0.003	0.001	-0.002	-0.007	0.035	-0.007	0.018	0.009	0.089	0.015	-0.001	-0.006	-0.007	0.093	-0.007	-0.006	0.015	-0.017
Disturbances in tooth eruption	digestive	0.013	0.041	0.047	-0.007	-0.008	0.006	0.004	0.055	0.04	0.003	0.04	0.022	0.01	0.021	-0.003	0.024	0.024	0.033	0.021	0.048	0.036	0.029	0.065	0.06	-0.01	0.005	0.04	0.035	0.012	0.012	0	-0.003	0.032	0.022	0.019	-0.002	0.03
Dental caries	digestive	0.006	0.066	0.041	0.036	0.034	0.04	0.043	0.038	0.061	0.049	0.002	0.016	0.04	0.018	0.023	0.077	0.045	0.05	0.042	0.041	0.016	0.062	0.039	0.034	0.004	0.046	0.011	0.055	0.037	0.02	0.011	0.028	0.031	0.059	0.039	0.01	0.076
Periapical abscess	digestive	0.006	0.058	0.023	0.036	0.042	0.009	0.02	0.006	0.04	0.026	-0.006	-0.022	0.047	0.008	-0.004	0.053	-0.006	0.034	0.033	0.025	-0.007	0.051	0.054	-0.004	-0.004	0.015	-0.007	0.006	0.024	0.014	0.014	0.021	-0.002	0.063	-0.004	-0.003	0.083
Gingival and periodontal diseases	digestive	0.022	0.033	0.006	0.021	0.008	0.001	-0.005	0.006	-0.004	0.002	-0.011	-0.005	-0.006	0.005	-0.007	0.022	0.006	0.02	0.016	-0.012	0.001	0.025	-0.007	0.034	-0.007	-0.008	-0.008	0.019	0.015	0.006	0.018	0.023	-0.003	-0.013	0.004	-0.006	0.038
Gingivitis	digestive	0.014	0.035	0.011	0.014	0.001	0.017	0.012	0.04	0.017	0.087	-0.008	-0.005	0.005	-0.002	0.012	0.048	-0.006	0.024	0.023	0.009	-0.008	0.034	-0.007	0.023	0.003	0.022	0	0.013	0.025	0.005	0.006	0.003	0.003	-0.007	0.014	-0.006	-0.007
Acute periodontitis	digestive	0.036	0.033	0.012	0.045	0.039	0.015	0.017	0.036	0.013	0.014	-0.026	-0.022	0.026	-0.014	0.008	0.044	-0.006	0.045	0.008	0	-0.006	0.026	-0.005	-0.004	0.003	0.04	-0.001	0.033	0.024	0.043	0.014	0.028	-0.015	0.04	0.05	-0.003	0.058
Chronic periodontitis	digestive	0.013	0.044	-0.012	0.021	0.015	-0.003	-0.012	0.004	-0.007	-0.006	-0.026	-0.024	0.001	-0.016	0.006	0.032	-0.015	0.027	0.015	-0.017	-0.013	0.019	-0.012	-0.011	0.001	-0.003	-0.008	0.038	0.009	0.012	0.012	0.007	-0.016	-0.008	0.014	-0.011	0.047
Anomalies of tooth position/malocclusion	digestive	0.012	0.03	0.006	-0.007	0.009	-0.006	-0.005	-0.001	0.004	0.002	-0.006	-0.009	0.005	0.005	-0.004	0.032	-0.001	0.035	0.02	-0.005	0.006	0.032	0.02	0.011	0.017	0.011	-0.012	0.033	-0.002	-0.004	-0.008	-0.003	-0.006	0.003	-0.003	-0.002	0.002
Other diseases of the teeth and supporting structures	digestive	0.014	0.049	0.032	0.022	0.032	0.013	0.007	0.026	0.045	0.041	-0.011	-0.011	0.04	-0.002	0.025	0.068	0.007	0.038	0.026	0.031	-0.007	0.059	0.062	0.033	0.002	0.029	-0.003	0.032	0.048	0.013	0.028	0.044	0.001	0.062	0.034	0.009	0.074
Loss of teeth or edentulism	digestive	0.02	0.027	0.007	0.029	0.028	0.006	-0.009	0.003	0.014	0.01	-0.016	-0.022	0.006	-0.016	0.011	0.068	-0.02	0.041	0.032	0.008	-0.013	0.051	-0.007	-0.011	0.006	0.01	-0.004	0.04	0.032	0.001	0.018	-0.006	-0.017	0	0.019	-0.011	0.031
Temporomandibular joint disorders	digestive	0.053	0.037	0.024	-0.004	0.002	0.018	0.001	0.018	0.026	0.032	-0.017	-0.009	-0.006	-0.009	0.003	0.036	-0.011	0.021	0.016	0.025	-0.008	0.031	0.012	-0.006	-0.007	0.018	-0.008	0.009	0.026	0.013	0.03	0.013	-0.01	-0.002	0.014	0.004	-0.008
Temporomandibular joint disorder, unspecified	digestive	0.06	0.065	0.031	0.009	0.013	0.012	0.007	0.022	0.053	0.032	-0.002	-0.005	0.015	0.007	0.008	0.057	0.002	0.012	0.01	0.041	0.005	0.064	0.054	0.009	0.001	0.015	0.005	0.007	0.028	0.033	0.023	0.042	0	0.03	0.01	0.01	0.013
Arthralgia/ankylosis of temporomandibular joint	digestive	0.051	0.035	0.017	0.002	-0.005	0.017	0.006	0.028	0.012	0.03	-0.011	-0.01	0.005	-0.009	0.003	0.049	-0.006	0.034	0.023	0.012	0.001	0.043	0.002	-0.007	0.003	0.007	0	0.021	0.045	0.012	0.064	0.022	-0.003	0.003	0.014	-0.006	0.011
Sialoadenitis	digestive	0.028	0.016	-0.006	0.008	-0.005	0.017	-0.006	-0.006	0.04	-0.007	-0.001	-0.015	0.005	-0.009	0.012	0.044	0	0.01	0.007	0.009	-0.008	0.033	0.002	-0.007	0.013	0.007	-0.008	0.007	0.004	0.012	0.018	0.032	-0.01	0.024	0.004	0.004	0.016
Disturbance of salivary secretion	digestive	0.005	0.041	0.021	0.013	0.006	0.04	0.033	0.027	0.029	0.02	0.001	0.003	0.025	-0.01	0.011	0.038	0.022	0.027	0.006	0.021	0.016	0.042	-0.008	0.022	-0.007	0.025	0.015	0.007	0.023	0.018	0.062	0.04	0.015	0.017	0.032	-0.007	0.019
Diseases of the oral soft tissues, excluding lesions specific for gingiva and tongue	digestive	0.05	0.069	0.017	0.047	0.027	0.045	0.028	0.03	0.066	0.026	-0.003	-0.014	0.015	-0.004	-0.001	0.056	0.004	0.049	0.041	0.032	-0.004	0.062	-0.007	0.012	0.011	0.027	0.005	0.022	0.031	0.014	0.011	0.022	-0.002	0.024	0.024	0.007	0.029
Diseases of lips	digestive	0.027	0.04	0.01	0.031	0.018	0.024	0.005	0.037	0.022	0.037	-0.006	-0.011	0.003	-0.01	0.002	0.031	-0.006	0.031	0.029	0.007	-0.008	0.025	0.001	0.003	0.002	0.01	-0.001	0.01	0.043	0.004	0.016	0.011	-0.004	0.012	0.013	-0.007	0.03
Diseases and other conditions of the tongue	digestive	0.015	0.031	0.018	0.015	0.021	0.018	0.019	0.006	0.017	0.012	-0.01	-0.004	0.011	-0.009	0.023	0.039	0.007	0.036	0.016	0.014	0.01	0.05	-0.007	0.004	0.004	0.013	-0.008	0.009	0.015	0.006	0.031	0.033	0.004	0.015	-0.006	0.005	0.023
Diseases of esophagus	digestive	0.049	0.042	0.008	0.017	0.02	0.01	0.023	0.002	0.032	0.021	-0.016	-0.018	0.016	-0.012	0.014	0.055	-0.014	0.036	0.015	0.009	-0.01	0.051	0.02	-0.008	-0.008	0.024	-0.01	0.02	0.025	0.023	0.021	0.046	-0.013	0.022	0.008	-0.008	0.034
Esophagitis, GERD and related diseases	digestive	0.019	0.043	0.02	0.033	0.027	0.02	0.043	0.019	0.043	0.011	0.029	0.02	0.03	0.019	0.002	0.051	0.046	0.052	0.038	0.019	0.008	0.035	-0.004	0.003	0.003	0.025	-0.002	0.029	0.043	0.017	0.051	0.038	0.02	0.04	0.009	0.021	0.043
GERD	digestive	0.062	0.118	0.066	0.046	0.042	0.052	0.078	0.04	0.179	0.041	0.016	-0.009	0.069	0.028	0.04	0.207	0.028	0.099	0.053	0.101	-0.004	0.18	0.014	0.008	0.04	0.068	0.025	0.061	0.066	0.053	0.044	0.067	0.021	0.064	0.048	0.023	0.17
Barrett's esophagus	digestive	0.025	0.023	0.012	0.004	0.022	0.009	0.02	-0.002	0.032	0.001	-0.031	-0.022	0.003	-0.015	0.014	0.028	-0.018	0.015	0.002	0.004	-0.012	0.031	-0.011	-0.004	0.028	0.009	-0.002	0.008	0.017	0	0.022	0.002	-0.011	-0.003	0.003	-0.01	0.058
Reflux esophagitis	digestive	0.04	0.055	0.032	0.017	0.02	0.023	0.024	0.003	0.064	0	-0.001	-0.005	0.031	0.012	0.009	0.081	0.003	0.027	0.035	0.037	0.007	0.063	0.014	0.011	0.002	0.03	-0.004	0.028	0.017	0.011	0.009	0.048	0.006	0.026	0.003	0.012	0.06
Eosinophilic esophagitis	digestive	0.005	-0.003	-0.001	0.001	0.006	-0.008	0	0.016	0.003	0.002	0.073	0.072	0.004	0.059	0.002	-0.011	0.085	0.014	0.014	0.014	0.025	-0.008	0.01	0.013	0.003	-0.004	0	0.038	0.014	-0.002	0.006	0.012	0.061	0.002	-0.007	0.064	-0.031
Esophageal bleeding (varices/hemorrhage)	digestive	-0.009	0.006	0.005	0.122	0.077	0.032	0.05	-0.006	0.007	0.011	-0.019	-0.01	-0.007	-0.01	-0.007	0.032	-0.006	0.013	-0.009	-0.007	-0.008	0.009	0.001	-0.007	-0.007	0.011	0	-0.001	-0.007	-0.002	-0.006	0.002	-0.004	0.023	0.003	0.003	0.04
Stricture and stenosis of esophagus	digestive	0.01	0.035	0.017	0.022	0.02	0.001	0.018	-0.008	0.018	0.011	-0.012	-0.013	-0.008	-0.003	0.033	0.044	-0.007	0.016	0.006	0.017	-0.005	0.039	0.003	-0.002	0.012	0.004	-0.005	0.004	-0.001	-0.002	-0.008	0.019	-0.014	0.013	-0.002	-0.001	0.028
Disorders of esophageal motility	digestive	0.04	0.021	0.009	-0.006	0.005	0.031	0.032	-0.006	0.04	0.019	-0.013	-0.007	0.018	-0.003	0.011	0.04	-0.012	0.016	0.006	0.019	-0.008	0.034	-0.008	0.002	0.011	0.014	0.007	-0.008	0.022	0.011	-0.006	0.047	-0.004	0.016	0.012	-0.007	0.032
Heartburn	digestive	0.009	0.033	0.042	0.01	0.012	0.024	0.04	-0.002	0.051	0.006	-0.015	-0.018	0.019	-0.002	0.013	0.058	-0.011	0.025	0.021	0.032	-0.007	0.036	-0.006	-0.011	0.014	0.026	-0.008	0.028	0.016	0.017	0.035	0.061	-0.012	0.022	-0.004	-0.01	0.048
Gastric ulcer	digestive	0.026	0.029	0.018	0.036	0.043	0.02	0.036	-0.008	0.036	0.018	-0.019	-0.016	0.02	-0.008	-0.002	0.052	-0.003	0.03	-0.006	0.009	-0.011	0.039	0.003	-0.009	-0.002	0.022	0.007	0.002	0.014	0.009	0.035	0.055	-0.014	0.025	0.006	-0.009	0.05
Peptic ulcer, site unspecified	digestive	0.033	0.029	0.015	0.019	0.026	0.008	0.038	-0.008	0.043	0.012	-0.01	-0.019	0.018	-0.013	-0.002	0.068	-0.011	0.035	0.001	0.035	-0.01	0.052	-0.003	-0.009	-0.002	0.001	0.002	0.013	0.031	0.031	0.036	0.042	-0.008	0.031	0.007	-0.009	0.07
Dysphagia	digestive	0.042	0.076	0.037	0.014	0.024	0.095	0.139	0.007	0.103	0.026	-0.012	0.008	0.033	0.026	0.034	0.112	0.031	0.082	0.036	0.053	0.005	0.095	-0.01	0.016	0.023	0.064	0.009	0.025	0.055	0.047	0.065	0.066	0.026	0.047	0.031	0.016	0.08
Atrophic gastritis	digestive	0.003	0.025	0.022	0.015	0.014	0.013	0.033	0.003	0.025	0.008	-0.012	-0.012	0.025	-0.011	-0.008	0.043	-0.003	0.03	0.039	0.018	-0.001	0.032	0	-0.008	0.01	0.029	0.005	0.001	0.011	0.021	0.035	0.026	-0.006	0.023	0.019	0.002	0.043
Other specified gastritis	digestive	0.007	0.028	0.018	0.017	0.025	0.024	0.052	0.002	0.041	-0.009	-0.007	-0.014	0.012	-0.012	-0.001	0.062	-0.005	0.044	0.034	0.019	-0.003	0.044	0.006	0	0	0.032	-0.003	0.016	0.026	0.018	0.031	0.046	-0.012	0.04	0.041	-0.008	0.033
Gastritis and duodenitis, NOS	digestive	0.059	0.064	0.038	0.024	0.037	0.053	0.073	0.017	0.085	0.024	-0.002	-0.017	0.039	-0.004	0.031	0.081	0.001	0.068	0.052	0.065	-0.011	0.091	0.013	0.012	0.032	0.046	0.009	0.026	0.072	0.038	0.043	0.046	-0.01	0.061	0.039	-0.002	0.071
Gastroparesis	digestive	0.007	0.04	0.018	0.022	0.011	0.017	0.037	0.029	0.062	0.014	0.033	0.024	0.039	0.022	-0.009	0.063	0.032	0.029	0.021	0.055	0.011	0.055	0.013	0.016	0	0.036	0.01	0.021	0.042	0.053	0.04	0.03	0.014	0.052	0.008	0.034	0.025
Dyspepsia and other specified disorders of function of stomach	digestive	0.067	0.07	0.022	0.011	0.014	0.03	0.029	0.014	0.062	0.022	-0.023	-0.019	0.015	-0.008	0.003	0.074	0.004	0.079	0.056	0.022	-0.008	0.078	-0.014	-0.004	0.009	0.027	-0.006	0.041	0.037	0.033	0.03	0.069	-0.005	0.044	0.01	-0.003	0.057
Other disorders of stomach and duodenum	digestive	0.018	0.052	0.02	0.059	0.059	0.028	0.055	0.021	0.046	0.021	-0.01	-0.012	0.023	0.001	0.009	0.082	0.004	0.038	0.024	0.015	0	0.055	0.002	0.01	0.01	0.045	0.015	0.016	0.032	0.041	0.016	0.033	-0.002	0.058	0.026	0.012	0.073
Bariatric surgery	digestive	0.033	0.077	0.017	0.017	0.025	0.024	0.072	0.002	0.092	0.018	-0.033	-0.035	0.014	-0.026	0.008	0.115	-0.015	0.058	0.125	0.045	-0.016	0.125	0.01	-0.01	-0.007	0.037	0.006	0.053	0.019	0.038	0.044	0.04	-0.015	0.05	0.017	-0.011	0.128
Acute appendicitis	digestive	0.016	0.023	0.018	-0.001	0.003	0.002	-0.007	-0.008	0.002	-0.003	0.004	-0.016	0	-0.002	-0.009	0.007	-0.007	0.013	0	-0.008	0.008	0.007	-0.003	-0.002	-0.002	-0.003	-0.005	0.001	-0.009	-0.002	0.001	0.005	-0.009	-0.002	-0.001	-0.001	0.026
Abdominal hernia	digestive	0.016	0.013	0.006	0.037	0.024	0.013	0.022	0.013	0.013	0.008	-0.013	-0.013	0.01	-0.005	0	0.04	0.002	0.038	0.011	0.002	-0.002	0.029	-0.008	0.001	0.001	0.007	0.012	-0.006	0.002	0.027	0.014	0.034	0	0.022	0.001	-0.007	0.052
Inguinal hernia	digestive	0.007	-0.003	0.006	0.038	0.024	0.001	0.014	-0.007	-0.005	-0.001	-0.026	-0.021	-0.009	-0.001	0.018	-0.012	-0.013	0.011	-0.011	-0.018	-0.008	-0.004	-0.02	0.001	0.005	0.008	-0.012	0.005	-0.009	-0.019	0.007	0.019	-0.009	0	-0.002	-0.005	0.039
Diaphragmatic hernia	digestive	0.035	0.054	0.013	0.031	0.032	0.033	0.039	0.007	0.043	0.009	-0.049	-0.037	0.004	-0.02	0.021	0.072	-0.03	0.054	0.017	0.014	-0.023	0.069	-0.018	-0.016	0.019	0.018	-0.009	0.011	0.037	0.014	0.029	0.035	-0.022	0.034	0.01	-0.015	0.086
Umbilical hernia	digestive	0.018	0.047	0.012	0.034	0.025	0.024	0.009	-0.01	0.011	0.009	-0.005	-0.023	0.013	-0.013	-0.007	0.039	-0.017	0.029	0.007	0.001	-0.004	0.026	-0.003	-0.006	-0.006	-0.001	0	-0.006	0.018	-0.004	-0.003	0.015	-0.01	0.013	-0.006	-0.011	0.05
Ventral hernia	digestive	0.027	0.029	0.002	0.02	0.019	0.024	0.05	0.003	0.015	0.019	-0.02	-0.023	0.023	-0.013	0.004	0.068	-0.014	0.019	0.03	0.01	-0.009	0.064	-0.003	-0.006	0.005	0.02	-0.01	-0.014	0.001	0.021	0.01	0.016	-0.01	0.032	0	-0.011	0.063
Incisional hernia	digestive	0.013	0.021	0.005	0.02	0.015	0.027	0.059	-0.003	0.026	0.005	-0.027	-0.021	0.027	-0.016	0.006	0.064	-0.012	0.032	0.024	0.006	-0.013	0.045	-0.001	-0.011	0.007	0.002	-0.013	-0.012	0.008	0.02	0.019	0.024	-0.017	0.033	0.001	-0.011	0.063
Regional enteritis	digestive	0.001	0.019	-0.01	0.004	0.007	0.005	0.021	0.006	0.03	-0.005	0.006	-0.01	0.011	-0.01	-0.004	0.029	-0.002	0.014	0.013	0.005	-0.012	0.015	-0.005	-0.003	0.009	0.006	-0.001	-0.005	0.025	0.005	0.015	0.009	-0.006	0.03	0.01	0.011	0.017
Ulcerative colitis	digestive	-0.002	0.015	-0.017	0.007	0.006	0.013	0.005	-0.008	0.011	0.003	0.004	-0.004	-0.009	-0.008	0.004	0.017	0	0.004	0.016	-0.002	-0.011	0.006	-0.004	0.005	0.019	0.01	-0.006	0.012	-0.009	0.003	0	0.004	0	0.012	0.005	-0.002	0.015
Ulcerative colitis (chronic)	digestive	0.004	0.011	-0.008	0.005	-0.001	0.037	0.003	-0.006	0.002	-0.008	-0.011	0.001	-0.013	-0.01	0.001	0.005	0.003	-0.002	0.005	-0.002	-0.009	0	-0.008	-0.007	0.02	0.004	0.006	0.006	-0.007	-0.003	-0.006	0.01	0.001	-0.004	-0.007	-0.007	0.002
Intestinal malabsorption (non-celiac)	digestive	0.016	0.023	0.014	0.004	0.003	0.002	0.028	0.017	0.022	0.025	0.001	-0.002	0.017	0.008	-0.002	0.041	0.006	0.042	0.053	0.037	0.002	0.039	0.01	0.006	0.006	0.023	0.014	0.012	0.007	0.015	0.01	0.041	0.006	0.03	0.006	-0.001	0.021
Celiac disease	digestive	-0.005	0.004	0.023	0.013	0.007	-0.01	0	0.002	0.02	-0.001	0.043	0.04	-0.001	0	-0.008	0.012	0.02	0.01	0.029	0.037	0.018	0.015	0.021	0.025	0	0.013	0.024	0.009	-0.008	0.019	-0.007	0	0.015	-0.007	0	0.026	-0.001
Noninfectious gastroenteritis	digestive	0.037	0.067	0.035	0.037	0.036	0.051	0.066	0.029	0.087	0.041	0.025	0.01	0.023	0.009	0.006	0.112	0.026	0.075	0.045	0.034	0.011	0.105	0.015	0.021	0.027	0.051	0.02	0.062	0.057	0.039	0.043	0.051	0.009	0.061	0.025	0.013	0.085
Ileostomy status	digestive	0.01	0.028	0.002	0.016	0.004	0.028	0.054	0.023	0.015	0	-0.018	-0.008	0.006	0.002	0.009	0.032	0.002	0.027	0.004	-0.003	-0.001	0.022	-0.008	0.01	0.001	0.003	-0.009	-0.015	0.011	0.002	-0.006	0.009	0.001	0.009	0.002	-0.007	0.04
Paralytic ileus	digestive	0.012	0.03	-0.001	0.03	0.024	0.055	0.091	0.001	0.008	0.02	-0.022	-0.015	0.02	-0.012	0.029	0.036	-0.006	0.023	0.02	0	-0.01	0.034	-0.009	-0.001	0.022	0.011	-0.004	-0.012	0.024	0.011	0.029	0.037	0.003	0.05	0.023	-0.008	0.051
Other intestinal obstruction	digestive	0.012	0.032	0.011	0.031	0.035	0.03	0.062	0.016	0.039	0.023	-0.026	-0.027	0.023	-0.016	-0.004	0.078	-0.012	0.058	0.022	0.013	-0.012	0.063	-0.001	-0.008	0.001	0.023	0.012	-0.008	0.034	0.025	0.029	0.035	-0.017	0.061	0.022	-0.008	0.072
Symptoms involving digestive system	digestive	0.016	0.064	0.041	0.033	0.04	0.043	0.036	0.035	0.058	0.031	0.011	0.022	0.036	0.021	0.037	0.085	0.01	0.062	0.032	0.06	0.004	0.085	-0.008	0.011	0.027	0.023	0.019	0.043	0.021	0.035	0.028	0.045	0.015	0.022	0.036	0.009	0.056
Diarrhea	digestive	0.057	0.12	0.071	0.035	0.039	0.073	0.113	0.039	0.169	0.052	0.005	0.005	0.076	0.02	0.025	0.194	0.023	0.081	0.068	0.105	0	0.186	0.019	-0.001	0.047	0.064	0.025	0.048	0.068	0.077	0.062	0.05	0.025	0.082	0.064	0.019	0.127
Flatulence	digestive	0.045	0.073	0.036	0.019	0.014	0.041	0.045	0.018	0.066	0.001	-0.003	-0.002	0.01	-0.001	0.018	0.068	0.021	0.062	0.02	0.045	-0.006	0.065	-0.007	0.028	0.003	0.02	0.02	0.004	0.022	0.042	0.014	0.018	0.01	0.03	0.012	0.018	0.06
Diverticulosis	digestive	0.022	0.029	0.004	0.033	0.026	0.016	0.027	-0.023	0.023	-0.006	-0.081	-0.07	-0.005	-0.044	0.025	0.072	-0.05	0.052	0	-0.011	-0.036	0.06	-0.035	-0.029	0.021	0.008	-0.016	0.014	0.018	-0.002	0.003	0.015	-0.047	0.013	-0.001	-0.026	0.103
Diverticulitis	digestive	0.05	0.037	0.02	0.023	0.032	0.01	0.029	-0.013	0.043	-0.003	-0.037	-0.032	-0.006	-0.017	0.021	0.05	-0.02	0.029	0	0.021	-0.017	0.042	-0.016	-0.015	0.004	0.008	-0.002	-0.003	0.01	0	0.02	0.026	-0.019	0.011	0	-0.014	0.058
Constipation	digestive	0.05	0.094	0.058	0.037	0.03	0.065	0.084	0.085	0.154	0.059	0.134	0.128	0.076	0.103	0.036	0.118	0.14	0.08	0.073	0.094	0.067	0.121	0.022	0.103	0.037	0.082	0.053	0.09	0.073	0.064	0.054	0.069	0.106	0.065	0.035	0.078	0.081
Functional digestive disorders	digestive	0.015	0.038	0.018	0.008	0.021	0.026	0.049	0.05	0.042	0.032	-0.004	-0.002	0.037	0.003	0.012	0.044	0.006	0.038	0.035	0.031	0.014	0.044	0.003	0.028	0.02	0.023	0.013	0.03	0.06	0.036	0.018	0.048	-0.004	0.025	0.021	0.007	0.036
Irritable Bowel Syndrome	digestive	0.084	0.105	0.073	0.009	0.018	0.04	0.04	0.024	0.135	0.036	-0.013	-0.027	0.053	-0.007	0.021	0.159	-0.017	0.102	0.032	0.105	-0.011	0.154	0.028	-0.012	0.012	0.063	0.018	0.027	0.075	0.064	0.038	0.05	-0.024	0.058	0.035	-0.007	0.05
Abnormal findings on exam of gastrointestinal tract/ abdominal area	digestive	0.019	0.032	0.015	0.023	0.028	0.025	0.047	0.001	0.039	0.002	-0.027	-0.025	0.013	-0.01	0.002	0.044	-0.009	0.04	0.018	0.009	-0.001	0.048	-0.009	-0.002	-0.002	0.026	-0.002	-0.011	0.016	0.022	0.008	0.013	-0.015	0.03	-0.001	-0.012	0.038
Personal history of diseases of digestive system	digestive	0.017	0.037	0.025	0.02	0.033	0.032	0.048	0.017	0.036	0.011	0.023	0.013	0.03	0.023	0	0.047	0.061	0.026	0.029	0.038	0.002	0.048	0.004	0.025	-0.005	0.023	0.011	0.024	0.033	0.02	0.026	0.012	0.031	0.023	0.02	0.02	0.061
Anal and rectal conditions	digestive	0.042	0.064	0.031	0.012	0.017	0.019	0.014	0.007	0.054	0.015	-0.019	-0.019	0.021	0.003	0.02	0.074	-0.014	0.037	0.022	0.051	-0.01	0.067	-0.001	-0.017	0.01	0.013	0.021	0.023	0.045	0.031	0.022	0.036	-0.01	0.031	0.007	-0.013	0.051
Anal and rectal polyp	digestive	0.022	0.017	-0.02	0.016	0.022	-0.003	0.006	0.004	0.002	0.011	-0.033	-0.024	-0.007	-0.016	0.006	0.031	-0.019	0.017	0.005	-0.007	-0.013	0.027	-0.012	-0.011	0.007	-0.004	-0.008	0.006	-0.004	0.011	-0.002	-0.005	-0.017	-0.005	0.001	-0.011	0.068
Peritonitis and retroperitoneal infections	digestive	0.01	0.026	-0.004	0.04	0.025	0.032	0.074	0.017	0.038	0.011	-0.017	-0.016	0.016	-0.003	-0.002	0.056	-0.007	0.03	0.006	0.012	-0.011	0.039	0.01	0.006	-0.002	0.022	0.019	-0.024	0.022	0.014	0.026	0.033	-0.009	0.048	0.021	-0.009	0.04
Peritoneal adhesions (postoperative) (postinfection)	digestive	0.015	0.022	0.012	0.022	0.021	0.035	0.043	0.018	0.034	0.022	-0.017	-0.009	0.029	-0.009	0.003	0.059	-0.005	0.046	0.016	0.014	-0.008	0.05	0.002	0.004	-0.006	0.029	0.009	0.003	0.026	0.029	0.019	0.033	-0.01	0.042	0.025	0.005	0.035
Other disorders of intestine	digestive	0.045	0.053	0.018	0.046	0.033	0.055	0.076	0.016	0.058	0.037	-0.015	-0.011	0.013	-0.013	0.018	0.08	0.004	0.06	0.032	0.021	-0.011	0.084	-0.001	0.002	0.002	0.046	0.014	0.016	0.022	0.036	0.028	0.048	-0.009	0.051	0.011	0.008	0.073
Gastrointestinal complications	digestive	0.01	0.045	-0.004	0.017	0.015	0.015	0.037	0.003	0.046	0.02	-0.022	-0.023	0.023	-0.013	0.004	0.093	-0.014	0.036	0.057	0.018	-0.009	0.083	0.008	0	0.011	0.026	0.009	-0.001	0.007	0.017	0.01	0.021	-0.01	0.044	0.006	-0.011	0.06
Other chronic nonalcoholic liver disease	digestive	0.012	0.053	0.029	0.067	0.049	0.042	0.062	0.02	0.054	0.019	-0.029	-0.033	0.035	-0.006	-0.002	0.077	-0.016	0.043	0.08	0.028	-0.013	0.103	-0.004	-0.004	0.009	0.038	-0.003	0.034	0.036	0.04	0.01	0.054	-0.013	0.038	0.027	-0.013	0.094
Cirrhosis of liver without mention of alcohol	digestive	-0.01	-0.002	0.006	0.111	0.062	0.044	0.069	0.005	0.008	0.012	-0.024	-0.018	0.001	-0.015	-0.011	0.032	-0.015	-0.002	0.016	-0.001	-0.013	0.01	-0.006	-0.011	0.008	0.007	-0.008	-0.015	0.009	-0.001	0.005	0.007	-0.012	0.048	-0.004	-0.004	0.041
Liver abscess and sequelae of chronic liver disease	digestive	-0.009	0	-0.007	0.074	0.036	0.056	0.073	0.005	0.014	0.029	-0.015	-0.01	0.004	-0.01	-0.007	0.034	-0.006	0.004	-0.001	-0.007	-0.008	0.014	-0.008	-0.007	0.003	0.025	-0.008	-0.003	0.014	0.012	-0.006	-0.007	-0.004	0.038	0.023	0.003	0.033
Portal hypertension	digestive	-0.002	0.016	0.005	0.113	0.079	0.033	0.058	-0.006	0.011	0.011	-0.015	-0.005	-0.007	-0.01	-0.007	0.023	0	0	-0.001	-0.006	-0.008	0.006	-0.007	-0.007	0.003	0.007	0	-0.013	-0.006	-0.002	0.006	-0.007	-0.004	0.013	0.013	0.004	0.024
Ascites (non malignant)	digestive	-0.005	0.021	0.003	0.062	0.047	0.066	0.111	-0.002	0.026	0.024	-0.023	-0.02	-0.002	-0.011	-0.005	0.053	-0.007	0.029	0.001	-0.005	-0.013	0.029	-0.006	-0.011	0.008	0.02	-0.003	-0.025	0.003	-0.001	-0.009	0.014	-0.012	0.046	-0.004	0.003	0.036
Other disorders of liver	digestive	0.007	0.035	0.016	0.033	0.018	0.023	0.043	-0.01	0.051	0.008	-0.037	-0.033	0.005	-0.019	0.006	0.058	-0.025	0.033	0.02	0.019	-0.02	0.054	-0.008	-0.017	0.015	0	-0.011	0.005	0.005	0.038	0.018	0.049	-0.018	0.02	0.008	-0.012	0.055
Jaundice (not of newborn)	digestive	-0.009	0.011	0.012	0.008	0.014	0.026	0.018	0.006	-0.004	0.021	-0.011	-0.01	-0.012	-0.002	-0.007	0.006	-0.005	-0.004	-0.008	-0.005	-0.008	-0.005	-0.007	-0.007	-0.007	-0.008	0	0.005	-0.006	-0.002	-0.006	-0.007	-0.003	0.003	0.004	-0.006	0.022
Nonspecific elevation of levels of transaminase or lactic acid dehydrogenase [LDH]	digestive	0.008	0.018	0.011	0.034	0.032	0.029	0.058	0.024	0.053	0.014	-0.014	-0.017	0.017	-0.011	0.003	0.054	0.004	0.033	0.014	0.03	0.01	0.039	0.001	-0.015	0.008	0.047	0.001	-0.001	0.024	0.01	0.031	0.021	-0.013	0.04	0.028	-0.009	0.056
Abnormal results of function study of liver	digestive	0.001	0.049	0.01	0.074	0.053	0.019	0.06	0.016	0.055	0.019	-0.03	-0.034	0.006	-0.022	0.02	0.08	-0.028	0.053	0.028	0.029	-0.02	0.069	-0.001	-0.017	0.041	0.035	0.005	0.033	0.053	0.031	0.008	0.013	-0.021	0.036	0.019	-0.017	0.053
Abnormal serum enzyme levels	digestive	0.033	0.037	0.031	0.046	0.046	0.034	0.04	0.025	0.032	0.015	0.014	-0.005	0.016	0.029	0.008	0.046	0.01	0.034	0.027	0.029	-0.004	0.053	-0.002	0.031	0.018	0.02	0.005	0.028	0.016	0.046	0.046	0.008	0.016	0.039	0.015	-0.011	0.04
Cholelithiasis	digestive	0.03	0.072	0.019	0.022	0.027	0.008	0.045	0.004	0.041	0.004	-0.035	-0.031	0.023	-0.019	-0.005	0.095	-0.028	0.064	0.011	0.022	-0.016	0.094	0.009	-0.004	0.006	0.025	0.004	0.014	0.024	0.001	0.014	0.02	-0.016	0.026	0.004	-0.018	0.09
Cholelithiasis with other cholecystitis	digestive	0.005	0.016	-0.007	-0.005	-0.001	0.002	0.029	-0.008	-0.004	-0.002	-0.028	-0.019	-0.003	-0.012	-0.002	0.032	-0.015	0.033	0.019	-0.004	-0.01	0.018	-0.003	-0.009	0.006	0.009	0.002	-0.001	-0.001	-0.007	-0.007	-0.009	-0.013	-0.013	-0.001	-0.008	0.031
Calculus of bile duct	digestive	0.026	0.009	0.004	0.007	0.001	0.024	0.029	-0.007	0.039	0.022	-0.012	-0.018	-0.001	-0.012	0.015	0.027	-0.014	0.026	0.009	0.014	-0.003	0.033	-0.001	-0.008	0.016	0	-0.003	-0.001	0.009	0.001	0.012	0	-0.012	0.006	0	-0.008	0.048
Cholecystitis without cholelithiasis	digestive	0.02	0.043	0.03	0.012	-0.005	0.026	0.035	-0.009	0.036	0.007	-0.022	-0.016	0.025	-0.01	0.008	0.067	-0.01	0.034	0.007	0.018	-0.007	0.057	0.012	-0.01	0.009	0.019	0.009	0.018	0.017	0.014	0.037	0.04	-0.016	0.032	-0.004	-0.003	0.063
Obstruction of bile duct	digestive	-0.001	0	0.001	-0.004	-0.004	0.01	0.007	-0.006	0.005	0.032	-0.013	-0.014	0	-0.002	-0.007	0.022	-0.005	0.006	-0.008	-0.008	-0.008	0.017	0.021	-0.006	0.024	0.013	-0.008	0.018	-0.006	0.006	-0.005	-0.007	-0.01	0.01	-0.006	-0.006	0.005
Other disorders of gallbladder	digestive	0.008	0.035	0.014	0.018	0.007	0.018	0.049	-0.007	0.036	0.022	-0.006	-0.014	0.018	-0.011	0.008	0.042	0	0.023	0.009	0.02	-0.009	0.036	0.029	-0.008	0	0.009	0.004	0.009	0.009	0.019	0.032	0.04	-0.012	0.041	0	0.009	0.061
Other disorders of biliary tract	digestive	0.005	0.022	0.015	0.019	0.017	0.008	0.06	-0.008	0.033	0.026	-0.013	-0.009	0.005	-0.002	0.005	0.043	-0.011	0.039	0.007	0.006	-0.004	0.034	-0.003	-0.009	0.006	0.013	0.002	0.003	-0.001	0.026	0.001	0.02	-0.003	0.043	-0.001	-0.009	0.042
Diseases of pancreas	digestive	0.006	0.021	-0.007	0.012	0.018	0.02	0.035	-0.009	0.016	0.001	-0.015	-0.02	0.007	-0.01	-0.011	0.033	-0.014	0.009	0.007	0.006	-0.012	0.042	0	-0.01	0.002	0.005	0.003	-0.005	0.017	0	0.006	0.021	-0.007	0.014	-0.01	-0.003	0.025
Acute pancreatitis	digestive	0.011	0.025	0.005	0.037	0.055	0.01	0.059	0.013	0.035	0.008	-0.015	-0.01	0.011	-0.001	0.034	0.06	0.009	0.038	0.018	0.014	-0.001	0.042	-0.005	0.003	0.022	0.019	0.004	0.007	0.011	0.019	0.022	0.028	0.002	0.053	0.017	-0.003	0.057
Cyst and pseudocyst of pancreas	digestive	-0.006	-0.002	-0.011	-0.004	0	0.003	-0.001	-0.008	0.006	-0.009	-0.017	-0.019	-0.011	-0.012	0.006	0.013	-0.015	0.004	0.001	-0.006	-0.01	0.009	-0.009	-0.009	0.007	-0.002	-0.004	-0.011	0	0.005	0.011	0.021	-0.013	-0.004	-0.009	-0.008	0.006
Blood in stool	digestive	0.044	0.041	0.028	0.043	0.047	0.048	0.079	0	0.059	0.014	-0.005	-0.015	0.021	-0.008	0.041	0.082	0.004	0.039	0.022	0.025	-0.003	0.085	-0.011	0.003	0.021	0.027	0.01	0.01	0.005	0.017	0.027	0.034	0.001	0.032	0.015	-0.007	0.088
Hemorrhage of rectum and anus	digestive	0.041	0.049	0.001	0.012	0.031	0.031	0.026	-0.005	0.056	0.013	-0.013	-0.02	0.017	-0.002	0.008	0.063	-0.002	0.03	0.029	0.025	-0.007	0.062	0.015	-0.012	0.013	0.016	0.021	0.011	0.026	0.023	0.03	0.039	-0.012	0.024	0.017	0	0.055
Hemorrhage of gastrointestinal tract	digestive	0.02	0.03	0.012	0.051	0.073	0.064	0.134	-0.003	0.041	0.005	-0.029	-0.031	0.007	-0.022	0.045	0.062	-0.011	0.041	0.016	0.001	-0.018	0.054	-0.017	-0.006	0.051	0.019	-0.011	0.002	0.013	0.012	0.024	0.015	-0.017	0.047	0.021	-0.005	0.11
Other symptoms involving abdomen and pelvis	digestive	0.023	0.042	0.023	0.016	0.006	0.044	0.061	-0.001	0.05	0.02	-0.029	-0.033	0.026	-0.015	0.014	0.062	-0.015	0.005	0.013	0.024	-0.01	0.061	0	-0.013	0.019	0.035	0.006	-0.01	0.005	0.035	0.009	0.037	-0.015	0.029	0.004	0.005	0.044
Splenomegaly	digestive	-0.006	0.025	0.012	0.035	0.014	0.042	0.077	-0.007	0.028	-0.002	-0.006	0	0.002	0.004	-0.009	0.017	0.022	-0.007	0.008	0.005	0.01	0.022	0.012	0.007	0.015	0.015	0.015	0.023	0	0.005	0.011	0.006	0.013	0.017	0	0.008	0.029
Nonspecific abnormal findings in stool contents	digestive	0.025	0.03	0.014	0.025	0.018	0.013	0.026	-0.008	0.037	0.006	-0.003	-0.006	-0.001	-0.005	0.034	0.045	0.007	0.02	0.003	0.035	-0.006	0.042	0.001	-0.005	0.031	-0.004	0.028	-0.006	0.005	-0.004	0.009	0.021	0.005	0.008	0	0.019	0.057
Nephritis and nephropathy in diseases classified elsewhere	genitourinary	0.02	0.031	0.005	0.013	0.012	0.067	0.089	0.002	0.019	0.007	-0.014	-0.017	0.004	-0.011	0.016	0.049	-0.004	0.031	-0.004	0.006	-0.009	0.054	-0.001	-0.008	0.008	0.026	-0.003	-0.002	0.027	0.025	0.071	0.024	-0.001	0.033	0.009	0.001	0.054
Nephritis and nephropathy with pathological lesion	genitourinary	-0.003	-0.002	0.007	-0.001	-0.012	0.013	0.003	0.004	0.003	0.009	-0.018	-0.016	0.001	-0.004	-0.008	0.003	-0.008	0.014	-0.002	-0.013	-0.009	-0.002	0.016	-0.007	-0.008	0.003	-0.002	-0.005	-0.007	-0.004	0.004	0.018	-0.011	0.009	0.011	-0.007	0.01
Acute renal failure	genitourinary	-0.01	0.018	-0.007	0.054	0.039	0.105	0.248	0.009	0.041	0.03	-0.052	-0.048	0.029	-0.023	0.058	0.092	-0.024	0.052	0.002	0.002	-0.018	0.066	-0.021	-0.012	0.034	0.049	0.01	-0.039	0.02	0.034	0.042	0.018	-0.028	0.09	0.024	-0.017	0.148
Renal failure NOS	genitourinary	-0.013	0.013	0.019	0.015	0.001	0.075	0.146	-0.008	0.023	-0.004	-0.012	-0.018	0.013	0.001	-0.003	0.047	0.003	0.023	0.004	0.001	0	0.039	-0.004	0.004	-0.01	0.023	0	0.004	0.012	0.007	0.016	0.024	-0.005	0.047	-0.002	-0.009	0.061
Chronic renal failure [CKD]	genitourinary	-0.015	0.012	-0.013	0.011	0.001	0.08	0.143	-0.003	0.014	0.016	-0.047	-0.042	0.014	-0.022	0.028	0.045	-0.02	0.015	-0.005	-0.016	-0.016	0.033	-0.013	-0.014	0.026	0.034	-0.008	-0.029	0.008	-0.004	0.03	0.008	-0.017	0.043	-0.003	-0.009	0.092
Renal dialysis	genitourinary	0	0.021	0.012	0.021	0.01	0.095	0.128	0.028	0.021	0.013	-0.008	-0.019	0.024	0.005	-0.001	0.043	0.008	0.016	0.002	0.006	-0.01	0.038	-0.002	0.007	0.015	0.046	-0.004	0.005	0.041	0.034	0.002	0.014	-0.013	0.071	0.063	0	0.048
End stage renal disease	genitourinary	-0.017	-0.024	-0.01	-0.007	-0.018	0.038	0.077	-0.005	-0.018	0.021	-0.024	-0.028	0.007	-0.011	-0.003	-0.01	-0.007	0.009	-0.016	-0.023	-0.01	-0.016	-0.004	-0.007	-0.013	0.001	-0.015	-0.021	-0.001	-0.01	0.002	-0.008	-0.016	0.02	-0.002	-0.012	-0.002
Chronic Kidney Disease, Stage III	genitourinary	-0.003	0.026	-0.011	0.018	0.008	0.065	0.123	-0.007	0.035	-0.001	-0.06	-0.056	0.01	-0.03	0.046	0.062	-0.03	0.019	-0.017	0.016	-0.023	0.062	-0.023	-0.025	0.032	0.018	-0.001	-0.042	0.022	-0.001	0.024	0.012	-0.031	0.035	-0.005	-0.01	0.106
Chronic Kidney Disease, Stage IV	genitourinary	-0.013	-0.004	-0.014	0.009	0.001	0.055	0.109	-0.011	-0.002	0.011	-0.029	-0.028	0.006	-0.011	0.027	0.015	-0.007	0.008	-0.012	-0.007	-0.011	0.005	-0.005	-0.008	0.003	0.019	-0.011	-0.021	0.015	-0.006	0.007	0.002	-0.012	0.025	-0.013	-0.007	0.049
Chronic kidney disease, Stage I or II	genitourinary	-0.004	0.027	0	0.014	0.006	0.035	0.068	0.014	0.034	0.007	-0.021	-0.027	0.02	-0.01	0.003	0.058	-0.015	0.021	-0.003	0.014	-0.005	0.05	-0.009	-0.007	0.004	0.05	-0.006	0.004	0.011	0.027	0.015	0.003	-0.008	0.028	0.01	-0.001	0.054
Other disorders of the kidney and ureters	genitourinary	0.02	0.025	0.008	0.019	0.01	0.076	0.123	-0.007	0.03	0.003	-0.042	-0.042	0.013	-0.025	0.03	0.05	-0.022	0.03	0.019	-0.009	-0.019	0.046	-0.014	-0.021	0.032	0.024	0.005	0.001	0.018	0.023	0.041	0.037	-0.022	0.036	0.003	-0.01	0.103
Cyst of kidney, acquired	genitourinary	0.015	0.032	0.011	0.022	0.006	0.017	0.034	-0.003	0.027	-0.007	-0.036	-0.03	0.001	-0.021	0.011	0.023	-0.02	0.013	-0.004	-0.004	-0.013	0.024	-0.012	-0.015	0.012	0.001	-0.01	0.018	0.01	0.016	0.009	0.029	-0.019	0.028	-0.001	-0.009	0.071
Stricture/obstruction of ureter	genitourinary	0.006	0.013	0.012	0.004	0.007	0.021	0.052	-0.009	0.004	0.008	-0.019	-0.022	-0.004	-0.014	0.04	0.012	-0.014	0.004	0.003	0	-0.012	0.004	-0.011	-0.003	0.035	-0.004	-0.012	0.002	0.004	0	0.015	0.009	-0.015	0.022	-0.003	-0.01	0.067
Kidney replaced by transpant	genitourinary	-0.015	-0.02	-0.006	0.005	-0.015	0.017	0.031	-0.003	-0.011	0.028	-0.021	-0.021	0.01	-0.011	-0.011	-0.005	-0.005	0.006	-0.014	-0.018	-0.008	-0.014	-0.001	0.001	0.001	0.005	-0.013	-0.015	-0.004	-0.006	-0.002	-0.005	-0.009	0.011	0.001	-0.011	-0.009
Renal osteodystrophy	genitourinary	-0.009	-0.008	-0.012	-0.011	-0.005	0.034	0.093	0.005	0.007	-0.007	-0.018	-0.015	-0.001	-0.009	0.012	0.021	0	0.01	-0.008	-0.013	-0.008	0.008	0.002	0.003	0.013	0.007	-0.008	-0.007	-0.006	-0.009	-0.006	-0.007	-0.01	0.013	0.004	-0.006	0.034
Secondary hyperparathyroidism (of renal origin)	genitourinary	0.003	-0.011	0.007	0.01	0.009	0.02	0.048	0.003	0.005	-0.008	-0.009	-0.017	0.006	0.002	0.009	0.014	-0.008	0.009	0.011	-0.007	-0.009	0.01	0	-0.008	-0.008	0.002	-0.009	0.001	0.02	0.002	0.014	0.001	-0.011	0.018	0.001	-0.007	0.025
Pyelonephritis	genitourinary	0.02	0.047	0.017	0.011	0.021	0.046	0.063	0.01	0.054	0.01	-0.004	-0.022	0.035	-0.004	0	0.081	-0.006	0.052	0.023	0.015	-0.013	0.082	-0.002	-0.011	0	0.016	0.001	0.01	0.007	0.027	0.025	0.034	-0.013	0.056	0.025	0.001	0.068
Urinary tract infection	genitourinary	0.083	0.14	0.076	0.031	0.029	0.082	0.118	0.019	0.147	0.032	-0.045	-0.056	0.065	-0.023	0.057	0.191	-0.028	0.083	0.046	0.08	-0.024	0.173	0.051	0.001	0.044	0.071	0.016	0.041	0.061	0.067	0.053	0.063	-0.036	0.068	0.041	-0.005	0.117
Cystitis	genitourinary	0.028	0.022	0	-0.005	-0.005	0.009	0.041	-0.006	0.025	0.011	-0.018	-0.01	-0.007	-0.01	0.022	0.046	-0.006	0.033	0.015	0.019	-0.008	0.047	0.002	0.003	0.032	0.002	0	0.001	-0.006	0.005	0.006	0.012	-0.01	0.024	-0.007	-0.006	0.029
Acute cystitis	genitourinary	0.033	0.083	0.048	0.015	0.016	0.036	0.053	0.012	0.074	0.015	-0.015	-0.026	0.02	-0.004	0.026	0.068	-0.011	0.022	0.016	0.063	-0.015	0.067	0.052	-0.003	0.013	0.034	0.01	-0.009	0.025	0.012	0.049	0.027	-0.016	0.057	-0.002	-0.007	0.073
Hematuria	genitourinary	0.029	0.052	0.011	0.024	0.027	0.027	0.051	-0.013	0.05	0.003	-0.049	-0.042	0.002	-0.017	0.042	0.065	-0.019	0.047	0.026	0.013	-0.009	0.058	-0.013	-0.009	0.023	0.029	0	0.023	0.012	0.008	0.01	0.051	-0.017	0.019	-0.003	-0.011	0.097
Gross hematuria	genitourinary	0.007	0.012	0.015	0.013	0.002	0.03	0.063	-0.011	0.01	-0.008	-0.035	-0.022	0.004	-0.018	0.033	0.021	-0.012	0.004	0.001	-0.001	-0.015	0.028	-0.014	-0.007	0.019	0.007	0.011	-0.004	0.005	0.006	0.014	0.013	-0.015	0.013	-0.007	-0.001	0.074
Microscopic hematuria	genitourinary	0.008	0.025	0.003	-0.003	0.009	0.021	0.026	-0.005	0.015	0.002	-0.025	-0.022	0.008	-0.014	0.018	0.019	-0.006	0.018	0.027	0.006	-0.015	0.027	-0.014	-0.007	0.025	0.019	0.007	0.009	0.028	0.003	-0.004	0.035	-0.008	0.005	0.004	-0.006	0.046
Urinary calculus	genitourinary	0.025	0.056	0.007	0.012	0.01	0.006	0.019	-0.01	0.02	0.01	-0.018	-0.019	0.026	-0.012	0.006	0.048	-0.016	0.036	0.019	-0.004	-0.013	0.05	0.004	0.001	0.006	0.011	0.001	0.01	0.026	0.015	0.018	0.029	-0.009	0.026	0.001	-0.005	0.07
Calculus of kidney	genitourinary	0.025	0.052	0.027	0.006	0.017	0.019	0.031	-0.001	0.045	0.009	-0.037	-0.039	0.013	-0.027	-0.001	0.076	-0.025	0.051	0.042	0.024	-0.023	0.069	0.002	-0.009	0.003	0.013	-0.001	0.011	0.028	0.029	0.011	0.033	-0.021	0.025	0.004	-0.018	0.069
Calculus of ureter	genitourinary	0.01	0.038	0.019	0.016	0.014	0.019	0.023	-0.002	0.028	0.003	-0.03	-0.031	0.017	-0.017	0.008	0.06	-0.022	0.027	0.024	-0.001	-0.017	0.052	-0.011	-0.014	0	0.013	-0.017	0.01	0.026	0.026	0.01	0.013	-0.018	0.023	0.001	-0.014	0.066
Renal colic	genitourinary	0.014	0.04	0.018	0.002	0.002	-0.008	0.001	-0.006	0.026	0.003	-0.01	-0.014	0.005	-0.009	0.003	0.026	-0.005	0.026	0.008	-0.001	-0.008	0.036	0.021	-0.006	-0.007	0.003	-0.008	-0.003	0.015	-0.001	0.006	0.013	-0.01	0.036	-0.006	-0.006	0.039
Hydronephrosis	genitourinary	0	0.03	0.007	0.001	0	0.041	0.082	-0.005	0.011	0.008	-0.022	-0.011	0.002	-0.01	0.019	0.03	-0.005	-0.002	0.002	-0.003	-0.01	0.015	-0.008	-0.001	0.004	-0.002	-0.006	-0.001	0.011	0.003	0.015	0.009	-0.011	0.029	-0.006	-0.012	0.063
Other disorders of bladder	genitourinary	0.02	0.037	0.004	-0.001	0.002	0.036	0.047	-0.009	0.025	0.001	-0.018	-0.02	-0.004	-0.01	0.033	0.046	0.001	0.034	0.012	0.015	-0.007	0.047	-0.011	-0.004	0.041	0.002	-0.013	0.007	-0.003	0.005	0.021	0.021	-0.011	0.045	-0.004	-0.003	0.065
Bladder neck obstruction	genitourinary	-0.005	0.003	0.004	-0.003	-0.004	-0.003	0	-0.007	-0.005	-0.001	-0.015	-0.018	-0.015	-0.012	0.007	0.001	-0.014	0.002	0.002	-0.01	-0.01	-0.009	-0.009	-0.008	0.016	-0.013	-0.003	-0.017	0.009	-0.006	0.002	0.007	-0.012	0.005	0	-0.008	0.018
Functional disorders of bladder	genitourinary	0.032	0.037	0.006	0	-0.004	0.058	0.096	0.026	0.035	0.002	-0.021	-0.017	0.029	-0.018	0.045	0.073	0.013	0.031	0.019	0.006	-0.005	0.054	-0.009	-0.001	0.025	0.033	0.003	0.001	0.028	0.03	0.072	0.072	-0.001	0.034	0.026	0.011	0.037
Other disorders of urethra and urinary tract	genitourinary	-0.005	0.001	-0.014	-0.008	-0.014	0.004	0.024	-0.007	-0.006	0.037	-0.02	-0.002	0.022	0	0.015	-0.012	-0.009	-0.01	-0.01	-0.007	-0.01	-0.01	-0.002	-0.008	0	-0.004	-0.01	-0.012	-0.008	-0.011	0.003	0	-0.007	0.006	-0.008	-0.008	-0.017
Urethral stricture (not specified as infectious)	genitourinary	-0.002	-0.006	0.005	-0.011	-0.005	0.008	0.005	-0.006	-0.002	-0.007	0.004	0.003	-0.002	-0.003	0.012	0.012	0.005	-0.001	-0.001	0.007	0.009	0.004	-0.007	-0.007	0.003	0.001	-0.008	-0.003	0.004	-0.002	0.006	0.002	0.003	0.013	-0.007	-0.007	0.027
Other cells and casts in urine	genitourinary	-0.003	-0.013	-0.014	0.003	0.012	0.015	-0.01	-0.01	-0.003	-0.007	-0.024	-0.026	-0.002	-0.009	-0.001	0.028	-0.02	0.011	0.003	-0.021	-0.014	-0.018	-0.008	-0.012	0.022	-0.009	0	-0.034	0.013	-0.004	0.017	-0.006	-0.018	0.002	0.006	-0.011	-0.002
Other nonspecific findings on examination of urine	genitourinary	0.015	0.014	0.027	0.01	0.002	0.038	0.059	-0.005	0.035	0.001	-0.01	-0.02	0.013	-0.003	0.007	0.048	0.012	0.032	0.026	0.023	0.003	0.039	-0.004	-0.002	0.024	0.023	0.007	0.001	0.01	0.029	0.014	0.034	-0.005	0.018	-0.007	-0.001	0.028
Other symptoms/disorders or the urinary system	genitourinary	0.025	0.015	0.027	0.004	0.012	0.023	0.061	0.006	0.03	0.005	-0.009	-0.005	0.025	0.007	0.026	0.038	0.016	0.034	0.007	0.014	0.002	0.044	-0.01	0.007	0.012	0.02	-0.003	0.007	0.014	0.023	0.031	0.041	0.011	0.034	0.008	-0.007	0.049
Retention of urine	genitourinary	0.017	0.037	-0.004	0.042	0.039	0.056	0.105	0.02	0.028	0.012	-0.029	-0.031	0.026	-0.018	0.049	0.071	-0.011	0.051	0.01	0.01	-0.01	0.047	-0.011	-0.011	0.035	0.019	-0.011	0.007	0.043	0.032	0.068	0.043	-0.022	0.07	0.03	-0.006	0.088
Dysuria	genitourinary	0.068	0.128	0.078	0.014	0.014	0.027	0.052	0.027	0.142	0.028	0.023	-0.001	0.061	0.021	0.02	0.156	0.008	0.082	0.036	0.09	0.006	0.142	0.066	-0.001	0.025	0.056	0.03	0.051	0.056	0.047	0.035	0.062	0.005	0.07	0.04	0.001	0.078
Urinary incontinence	genitourinary	0.037	0.084	0.031	0.017	0.024	0.068	0.082	0.047	0.077	0.033	0.042	0.033	0.062	0.041	0.057	0.139	0.059	0.093	0.067	0.057	0.039	0.135	-0.023	0.045	0.03	0.051	0.008	0.067	0.051	0.05	0.047	0.061	0.035	0.026	0.052	0.036	0.042
Frequency of urination and polyuria	genitourinary	0.043	0.088	0.025	0.024	0.025	0.036	0.074	0.038	0.102	0.019	0.007	0.001	0.047	0.015	0.066	0.122	0.014	0.071	0.046	0.068	0.01	0.098	-0.004	0.005	0.064	0.032	0.026	0.046	0.06	0.04	0.02	0.03	0.015	0.04	0.01	0.004	0.081
Other symptoms involving urinary system	genitourinary	0.02	0.047	0.027	0.024	0.022	0.021	0.026	0.026	0.03	0.022	-0.023	-0.025	0.035	-0.014	0.013	0.068	-0.012	0.041	0.039	0.019	-0.01	0.056	-0.004	-0.007	0.025	0.018	0.003	0.022	0.033	0.034	0.052	0.029	-0.019	0.042	0.02	-0.006	0.048
Other abnormality of urination	genitourinary	0.036	0.041	0.008	0.03	0.023	0.04	0.061	0.03	0.051	0.029	-0.011	-0.025	0.024	-0.005	0.042	0.08	0	0.082	0.029	0.023	-0.019	0.069	-0.017	-0.011	0.029	0.04	0.005	0.017	0.048	0.023	0.023	0.035	-0.013	0.049	0.038	-0.006	0.04
Hyperplasia of prostate	genitourinary	-0.002	-0.011	-0.019	0.031	0.032	0.024	0.062	-0.022	-0.01	-0.009	-0.072	-0.062	-0.01	-0.037	0.076	0.009	-0.036	0.018	-0.012	-0.028	-0.031	-0.01	-0.029	-0.026	0.055	-0.008	-0.018	0.002	0.007	-0.013	0.024	0.015	-0.043	0.012	0.001	-0.022	0.108
Prostatitis	genitourinary	0.01	0.01	0.007	0.033	0.015	0.006	0.013	-0.007	0.003	-0.008	-0.021	-0.016	0.021	-0.011	0.01	0.014	-0.013	0.014	0.019	0.007	-0.009	0.01	-0.008	-0.007	0.001	0.008	0.006	0.013	0.011	0.009	0.015	0.001	-0.011	-0.005	0.011	-0.007	0.027
Orchitis and epididymitis	genitourinary	-0.004	0.022	0.007	0.048	0.035	0.006	0.007	0.003	0.025	0.008	0	-0.012	0.025	-0.005	0.009	0.016	-0.013	0.018	-0.003	0.015	-0.001	0.023	-0.008	-0.008	0.001	0.011	0.005	0.011	0.02	0.009	0.024	0.009	-0.011	0.023	0.019	-0.007	0.039
Hydrocele	genitourinary	-0.001	-0.005	0	0.021	0.02	-0.008	-0.011	-0.006	0.005	0.002	0.006	0.019	-0.006	0.005	0.003	0.008	0.012	0.015	0	0.006	0.018	0.004	-0.007	0.014	0.013	0.002	-0.008	0.016	0.004	-0.009	-0.006	-0.007	-0.003	0.009	-0.006	0.025	0.014
Disorders of penis	genitourinary	-0.009	0.001	0.005	0.039	0.031	0.025	0	-0.006	0.009	0.002	0.053	0.037	-0.001	0.026	0.003	0.004	0.046	0	-0.001	0.005	0.009	-0.006	-0.007	0.013	-0.007	-0.003	0.017	0.026	-0.006	-0.002	-0.006	0.012	0.036	0.019	0.024	0.024	0.013
Erectile dysfunction [ED]	genitourinary	0.013	0.025	0	0.066	0.045	0.011	0.019	-0.017	0.001	-0.007	-0.052	-0.05	-0.004	-0.028	0.029	0.044	-0.035	0.027	-0.012	-0.012	-0.025	0.004	-0.02	-0.023	0.037	-0.006	-0.008	0.005	0	-0.003	0.002	0.003	-0.033	0.028	0.005	-0.019	0.094
Other disorders of male genital organs	genitourinary	-0.001	0.009	0.012	0.044	0.03	0.008	0.01	0.004	0.013	0.008	0.018	-0.005	0.01	0.011	0.032	0.007	-0.007	0.017	0.005	0.009	-0.008	0.012	-0.015	-0.009	0.02	0.014	0.003	0.032	0.007	0.009	0.045	0.019	-0.005	0.024	0.026	0.002	0.033
Cystic mastopathy	genitourinary	0.065	0.074	0.025	-0.003	-0.005	0.004	-0.011	0.003	0.028	0.004	-0.055	-0.047	-0.01	-0.028	0.006	0.086	-0.032	0.05	0.016	0.001	-0.017	0.075	-0.018	-0.018	0.001	0.02	-0.016	0.051	0.03	-0.002	0.004	0.025	-0.03	-0.006	0.008	-0.017	0.015
Fibrosclerosis of breast	genitourinary	0.036	0.041	0.009	0.008	0.007	-0.007	-0.018	-0.009	-0.005	-0.011	-0.03	-0.022	-0.004	-0.014	-0.011	0.029	-0.018	0.01	0.018	0.007	-0.012	0.023	-0.011	-0.01	-0.01	0.023	-0.007	0.042	0.004	-0.004	-0.001	-0.004	-0.015	-0.009	-0.003	-0.01	0
Benign neoplasm of breast	genitourinary	0.04	0.026	0.011	0	0.004	-0.004	-0.006	0.01	0.022	-0.009	-0.025	-0.019	-0.007	-0.012	-0.009	0.034	-0.015	0.022	0.001	0.007	-0.01	0.026	-0.003	-0.009	-0.009	-0.002	0.015	0.019	0.016	-0.001	-0.007	-0.002	-0.013	-0.009	0.007	0	0.002
Other specified benign mammary dysplasias	genitourinary	0.026	0.016	0.01	0.007	0.006	0	-0.001	0.015	0.008	-0.007	-0.013	-0.015	0.003	-0.01	0.011	0.017	-0.012	0.013	0.021	0.006	-0.008	0.017	-0.008	-0.007	-0.007	0.005	-0.001	0.014	0.003	0.018	-0.006	0.002	-0.011	-0.008	0.012	-0.007	-0.008
Abnormal findings on mammogram or breast exam	genitourinary	0.041	0.015	0.012	0.015	0.005	0.029	0.008	0.019	0.009	0.013	-0.022	-0.019	-0.007	-0.012	-0.001	0.02	-0.015	0.019	0.007	0.005	-0.01	0.012	-0.002	-0.009	-0.001	0.006	-0.004	0.018	0.016	0.011	0.011	-0.009	-0.013	-0.004	0.015	-0.008	-0.015
Abnormal mammogram	genitourinary	0.083	0.113	0.032	0.002	0.001	-0.005	-0.02	-0.006	0.055	-0.001	-0.092	-0.079	-0.011	-0.05	-0.015	0.125	-0.057	0.076	0.017	0.012	-0.043	0.097	-0.028	-0.034	0.009	0.003	-0.02	0.045	0.005	0	0.004	0.01	-0.049	-0.012	-0.001	-0.033	0.011
Mammographic microcalcification	genitourinary	0.013	0.028	0.002	0.002	0.001	-0.008	0.01	-0.01	0.02	-0.006	-0.026	-0.024	0.004	-0.015	-0.005	0.027	-0.015	0.03	-0.004	0.005	-0.013	0.029	-0.012	-0.011	-0.005	-0.003	-0.008	0.01	-0.004	0.016	0.005	0.007	-0.016	-0.008	-0.004	-0.01	-0.001
Lump or mass in breast	genitourinary	0.063	0.088	0.028	0.011	0.006	0.005	-0.002	0	0.063	0.001	-0.058	-0.058	-0.009	-0.039	-0.008	0.117	-0.043	0.067	0.028	0.019	-0.025	0.099	-0.001	-0.024	0.007	0.019	-0.009	0.027	0.01	0.018	0.005	0.008	-0.032	0.005	-0.005	-0.021	0.016
Hypertrophy of breast (Gynecomastia)	genitourinary	0.017	0.053	0.001	0.027	0.022	0.007	0.012	0.011	0.027	0.011	0.007	-0.007	0.024	-0.003	-0.006	0.07	-0.005	0.037	0.076	0.033	0.013	0.051	0.004	0.013	-0.005	0.014	-0.004	0.041	0.014	0.011	0.005	0.006	-0.009	0.01	0.013	0.002	0.019
Inflammatory disease of breast	genitourinary	0.082	0.03	0.017	0.01	-0.002	0.006	0.018	0.003	0.036	0	-0.015	-0.016	0.021	-0.004	0.001	0.048	-0.008	0.026	0.004	0.003	-0.001	0.039	0.008	-0.008	0.001	0.003	-0.009	0.012	0.02	0.015	0.014	0.018	-0.005	0.023	0.019	-0.007	0.021
Mastodynia	genitourinary	0.046	0.07	0.02	0.01	0.024	0.026	-0.003	-0.006	0.055	0.009	-0.022	-0.029	0.004	-0.019	-0.009	0.083	-0.023	0.056	0.019	0.028	-0.012	0.063	0.004	-0.013	0.006	0.019	-0.004	0.014	0.029	0.011	-0.006	0.03	-0.02	0.019	0.012	-0.013	0.042
Other signs and symptoms in breast	genitourinary	0.023	0.022	-0.004	0.009	0.018	0.001	-0.021	0.002	0.017	-0.008	-0.029	-0.029	0.005	-0.022	-0.016	0.036	-0.016	0.047	0.002	-0.016	-0.006	0.017	-0.009	-0.011	0.002	0.001	0.004	-0.028	0.004	0.008	0.003	-0.011	-0.017	0.006	0.012	-0.01	0.002
Other specified disorders of breast	genitourinary	0.047	0.053	0.002	0.018	0.005	0.008	0	0.002	0.015	0.009	-0.037	-0.033	0.008	-0.021	-0.003	0.062	-0.026	0.037	0.034	-0.008	-0.018	0.039	-0.012	-0.015	0.02	0.011	-0.015	0.04	0.009	0.009	-0.002	0.015	-0.023	-0.005	-0.001	-0.015	0.023
Cervicitis and endocervicitis	genitourinary	0.007	0.025	0.03	-0.004	-0.011	0.018	0.001	0.018	0.01	-0.007	-0.003	-0.014	0.006	-0.002	-0.007	0.036	-0.005	0.016	0.008	0.007	-0.008	0.047	-0.007	-0.006	-0.006	0.013	-0.008	0.038	0.005	0.014	-0.005	0.003	-0.01	0.015	0.025	-0.006	0.004
Vaginitis and vulvovaginitis	genitourinary	0.071	0.141	0.088	0.013	0.01	0.025	-0.001	0.022	0.118	0.033	-0.005	-0.024	0.052	0.006	-0.012	0.112	-0.012	0.064	0.051	0.094	-0.006	0.124	0.079	-0.003	0.007	0.056	0.021	0.055	0.049	0.051	0.011	0.047	-0.005	0.046	0.001	-0.01	0.057
Endometriosis	genitourinary	0.047	0.069	0.024	0.01	0.009	0.008	-0.011	-0.002	0.034	0.012	-0.013	-0.02	0.019	-0.011	-0.005	0.052	-0.011	0.041	0.011	0.042	-0.013	0.05	-0.006	-0.004	0.002	0.017	0.013	0.004	0.022	0.013	0.013	0.038	-0.008	0.019	0.002	-0.01	0.012
Prolapse of vaginal walls	genitourinary	0.018	0.036	0.01	-0.005	-0.002	0.006	0.005	0.006	0.035	-0.004	-0.032	-0.028	-0.006	-0.018	0.012	0.053	-0.016	0.033	0.017	0.019	-0.015	0.05	-0.009	-0.013	0.008	0.006	-0.011	0.004	0.02	-0.01	0.001	0.002	-0.012	0.006	0.008	-0.007	-0.001
Uterine/Uterovaginal prolapse	genitourinary	0.017	0.025	0.002	-0.016	-0.012	0.01	-0.013	0.006	0.02	-0.004	-0.027	-0.022	-0.014	-0.014	-0.004	0.028	-0.009	0.018	0.014	-0.001	-0.012	0.023	-0.011	-0.01	0.003	-0.007	-0.012	0.014	-0.01	-0.009	-0.001	-0.01	-0.015	-0.016	-0.003	-0.003	-0.007
Noninflammatory female genital disorders	genitourinary	0.013	0.05	0.011	0.002	0.005	0.012	-0.008	0.007	0.039	0.016	-0.019	-0.018	0.033	-0.009	-0.01	0.04	-0.017	0.03	0.032	0.021	-0.011	0.053	0.117	-0.01	-0.003	0.016	-0.006	0.028	0.005	0.012	0.008	0.011	-0.01	0.022	0.005	-0.009	0.027
Noninflammatory disorders of ovary, fallopian tube, and broad ligament	genitourinary	0.011	0.048	0.03	0	0.005	0.007	0.009	-0.006	0.036	0.018	-0.017	-0.016	0.007	-0.004	-0.007	0.034	-0.013	0.02	0.027	0.034	-0.008	0.04	0	-0.007	-0.007	0.037	-0.001	0.007	0.003	0.003	-0.006	0.01	-0.011	0.015	-0.007	-0.007	0.011
Disorders of uterus, NEC	genitourinary	0.023	0.031	0.016	-0.009	0.004	0.003	0.003	0.01	0.017	0.027	-0.017	-0.015	0.002	-0.012	0.006	0.041	-0.015	0.015	0.019	0.013	-0.01	0.032	0.005	-0.009	-0.001	0.018	0.002	0.013	0.016	-0.001	0.002	0.006	-0.008	0.008	0.015	-0.008	-0.003
Noninflammatory disorders of cervix	genitourinary	0.006	0.016	0.011	0.008	0.013	-0.008	0.006	0.017	0.028	-0.007	-0.015	-0.015	0.027	-0.01	-0.007	0.03	0	0.005	0.007	0.008	-0.008	0.025	0.002	-0.007	-0.007	0.017	0	0.02	0.014	0.012	-0.006	0.022	-0.004	0.013	0.013	-0.006	0.008
Noninflammatory disorders of vagina	genitourinary	0.033	0.057	0.035	-0.002	0.005	0.045	0.004	0.019	0.045	0.03	-0.019	-0.017	0.026	-0.011	0.001	0.07	-0.011	0.056	0.036	0.049	-0.007	0.058	0.034	-0.011	-0.005	0.036	0.018	0.036	0.042	0.049	0.013	0.032	-0.004	0.016	0.009	-0.004	0.025
Endometrial hyperplasia	genitourinary	0.019	0.023	0.037	0.001	0.012	-0.008	-0.001	0.016	0.017	0.01	-0.006	-0.015	0.009	-0.01	0.011	0.02	-0.006	0.004	-0.009	0	-0.008	0.022	-0.008	-0.007	0.012	0.03	-0.001	0.015	0.013	0.025	0.005	0.011	-0.01	0.017	0.013	0.003	-0.003
Polyp of corpus uteri	genitourinary	0.012	0.039	0.009	0.005	0.012	-0.006	-0.009	0.029	0.006	0.014	-0.023	-0.022	0.008	-0.014	0.015	0.036	-0.017	0.03	0.024	0.006	-0.012	0.038	-0.011	-0.01	0.023	0.017	-0.001	0.029	0.025	0.02	-0.001	0.016	-0.011	0.002	0.011	-0.01	0.008
Mucous polyp of cervix	genitourinary	0.031	0.03	0.013	0.002	0.006	-0.01	-0.014	0.002	0.001	-0.001	-0.024	-0.018	-0.011	-0.012	-0.009	0.018	-0.014	0.01	0.028	0.013	-0.01	0.019	-0.009	-0.008	0	0.008	0.003	0.025	0.017	0.012	-0.007	-0.008	-0.012	-0.003	0	-0.008	-0.019
Symptoms involving female genital tract	genitourinary	0.027	0.05	0.034	0.003	0.013	0.019	-0.004	0.012	0.047	0.023	0	-0.017	0.004	-0.005	0	0.056	-0.014	0.003	0.03	0.022	-0.002	0.047	0.053	-0.008	0.009	0.001	0.032	0.018	0.036	0.014	0.003	0.016	-0.006	0.029	-0.008	-0.008	0.023
stress incontinence, female	genitourinary	0.048	0.083	0.034	-0.005	-0.006	0.005	0.021	0	0.065	0.018	-0.04	-0.035	-0.001	-0.023	0.032	0.128	-0.026	0.081	0.036	0.035	-0.012	0.095	-0.002	-0.012	0.03	0.014	-0.009	0.023	0.028	0.014	0.016	0.02	-0.01	0.005	0.01	-0.016	0.021
Pain and other symptoms associated with female genital organs	genitourinary	0.07	0.128	0.048	0.008	0.016	0.009	0.001	0.038	0.109	0.046	-0.035	-0.039	0.048	-0.02	-0.002	0.132	-0.03	0.073	0.037	0.07	-0.025	0.115	0.056	-0.017	0.005	0.048	0.021	0.044	0.063	0.063	0.01	0.06	-0.025	0.046	0.01	-0.017	0.043
Dyspareunia	genitourinary	0.035	0.064	0.016	0.01	0.009	0.009	-0.01	0.019	0.046	0.012	-0.007	-0.019	0.006	-0.012	-0.009	0.055	-0.002	0.034	0.013	0.035	-0.01	0.044	0.012	-0.009	-0.009	0.022	0.015	0.032	0.016	0.038	-0.007	0.021	-0.013	0	0.015	-0.008	0.011
Disorders of menstruation and other abnormal bleeding from female genital tract	genitourinary	0.016	0.047	0.035	0.004	0.011	-0.001	0.009	0.036	0.065	0.02	-0.006	0.003	0.048	0.023	-0.004	0.06	0.002	0.026	0.055	0.054	0.022	0.064	0.055	0.029	-0.004	0.053	0.015	0.013	0.031	0.034	0.022	0.009	-0.002	0.001	0.01	-0.003	0.033
Irregular menstrual cycle/bleeding	genitourinary	0.057	0.081	0.051	0.032	0.032	0.005	0	0.022	0.049	0.026	-0.013	-0.024	0.053	-0.002	0.002	0.092	-0.013	0.057	0.052	0.055	-0.006	0.081	0.049	0.026	0.003	0.066	-0.003	0.042	0.051	0.038	0.014	0.046	-0.014	0.026	0.003	-0.015	0.031
Absent or infrequent menstruation	genitourinary	0.031	0.077	0.035	-0.001	0.003	-0.001	-0.014	0.03	0.085	0.02	-0.013	-0.024	0.081	-0.01	-0.008	0.086	-0.012	0.023	0.035	0.059	-0.004	0.07	0.216	0.002	-0.007	0.054	0.056	0.039	0.039	0.026	0.012	0.03	-0.024	0.041	-0.011	-0.002	0.075
Excessive or frequent menstruation	genitourinary	0.056	0.115	0.056	0.013	0.004	0.005	-0.019	0.025	0.065	0.033	-0.027	-0.039	0.023	-0.012	-0.011	0.108	-0.027	0.065	0.048	0.053	-0.015	0.107	0.019	-0.003	-0.013	0.045	0.013	0.039	0.06	0.045	-0.001	0.039	-0.023	0.02	0.012	-0.016	0.036
Irregular menstrual cycle	genitourinary	0.013	0.068	0.041	0.005	0.008	-0.007	-0.006	0.048	0.09	0.027	-0.004	-0.022	0.056	0.021	-0.018	0.079	-0.009	0.05	0.057	0.059	-0.003	0.07	0.12	0.007	-0.013	0.067	0.006	0.053	0.025	0.055	-0.001	0.033	-0.018	0.026	0.008	-0.012	0.044
Irregular menstrual bleeding	genitourinary	0.037	0.056	0.022	0.008	0.003	0.02	-0.003	0.025	0.043	0.018	-0.014	-0.016	0.02	-0.008	-0.002	0.052	-0.003	0.037	0.017	0.033	0.002	0.047	0.017	0.02	-0.002	0.026	0.001	0.031	0.014	0.025	0.009	0.005	-0.009	0.017	0.013	-0.009	0.011
Dysmenorrhea	genitourinary	0.04	0.093	0.04	0.008	0.004	0.004	-0.018	0.015	0.079	0.008	0.019	-0.019	0.043	0.011	-0.014	0.075	-0.004	0.039	0.017	0.086	0.009	0.085	0.074	0.011	-0.009	0.046	0.027	0.039	0.017	0.038	-0.006	0.033	0.002	0.028	0.001	-0.003	0.046
Premenstrual tension syndromes	genitourinary	0.051	0.074	0.043	0.018	0.017	0.025	-0.014	0.03	0.062	-0.001	-0.006	-0.006	0.06	-0.006	-0.008	0.07	0.001	0.043	0.049	0.047	-0.002	0.08	0.014	0.009	-0.008	0.051	0.004	0.033	0.035	0.043	-0.007	0.04	-0.007	0.028	0.017	-0.008	0.008
Infertility, female	genitourinary	0.008	0.052	0.022	0.005	0.003	-0.003	-0.016	0.011	0.046	-0.012	-0.025	-0.021	0.013	-0.016	-0.012	0.031	-0.012	0.037	0.024	0.023	-0.013	0.029	0.054	-0.011	-0.005	0.005	0.016	0.018	0.008	0.011	-0.009	0.012	-0.017	0.014	-0.005	-0.011	-0.018
Menopausal and postmenopausal disorders	genitourinary	0.017	0.043	-0.002	0.005	-0.009	-0.001	0.002	-0.009	0.034	0.008	-0.025	-0.022	0.015	-0.014	-0.01	0.042	-0.017	0.03	0.014	0.008	-0.012	0.049	-0.011	-0.01	0.003	0.02	-0.007	0.025	-0.01	0.006	-0.001	0.009	-0.015	-0.012	0.004	-0.003	0.001
Postmenopausal bleeding	genitourinary	0.037	0.056	0.023	0.005	-0.006	0.02	0.008	-0.006	0.034	0.012	-0.045	-0.037	0.007	-0.024	0.013	0.076	-0.027	0.049	0.029	0.025	-0.02	0.072	-0.019	-0.017	0.019	0.017	-0.001	0.031	0.021	0.003	0.014	0.041	-0.026	0.008	-0.005	-0.008	0.016
Symptomatic menopause	genitourinary	0.087	0.125	0.04	0.016	-0.002	0.007	-0.009	-0.007	0.074	0.009	-0.076	-0.065	0.005	-0.037	0.009	0.15	-0.045	0.094	0.043	0.04	-0.033	0.133	-0.028	-0.027	0.009	0.017	-0.01	0.07	0.045	0.007	0.009	0.026	-0.04	-0.015	-0.007	-0.024	0.021
Need for Hormone replacement therapy (postmenopausal)	genitourinary	0.007	0.035	-0.006	-0.003	-0.015	-0.004	-0.002	-0.003	0.03	-0.006	-0.026	-0.022	0.006	-0.016	0	0.046	-0.02	0.019	0.023	0.005	-0.013	0.042	-0.012	-0.011	0	0.001	-0.004	0.006	0.002	-0.016	-0.01	0.017	-0.013	-0.012	0.001	-0.011	0.005
Postmenopausal atrophic vaginitis	genitourinary	0.052	0.085	0.018	-0.001	-0.005	0.011	0.01	-0.001	0.075	0.005	-0.044	-0.036	-0.009	-0.024	0.015	0.093	-0.024	0.042	0.024	0.033	-0.02	0.072	-0.018	-0.017	0.008	0.017	-0.003	0.024	0.014	0.013	0.005	0.019	-0.022	-0.008	0.009	-0.012	0.013
Premenopausal menorrhagia	genitourinary	0.017	0.061	0.024	0.011	0.004	-0.009	-0.002	0.004	0.037	0.001	-0.008	-0.016	0.007	-0.004	0.001	0.064	-0.013	0.002	0.005	0.033	-0.009	0.045	0.025	-0.007	0.002	0.027	0.021	0.031	0.002	0.023	-0.006	0.019	-0.005	0.005	0.002	-0.007	0.014
Ovarian cyst	genitourinary	0.049	0.069	0.046	0.006	0.009	0.029	0.004	0.016	0.082	0.035	-0.037	-0.038	0.039	-0.019	-0.02	0.079	-0.026	0.042	0.019	0.031	-0.022	0.08	0.049	-0.015	-0.008	0.045	0.007	0.028	0.039	0.051	-0.003	0.023	-0.019	0.035	0.026	-0.011	0.026
Miscarriage; stillbirth	pregnancy complications	0.015	0.025	0.021	0.004	0.003	0.005	-0.013	0.003	0.03	0.008	-0.01	-0.017	0.034	0.001	-0.008	0.018	-0.013	-0.004	-0.003	0.011	-0.002	0.013	0.14	-0.008	-0.008	0.028	0.019	0.012	-0.007	0.027	-0.007	0	-0.012	0.017	-0.008	0.001	0.021
Missed abortion/Hydatidiform mole	pregnancy complications	-0.002	0.02	0.026	-0.011	0	0	-0.012	0.005	0.011	0.02	-0.009	-0.015	0.004	-0.01	-0.007	0.016	-0.012	0.004	-0.001	0.01	0	0.011	0.089	-0.007	-0.007	0.006	0.015	0.007	0.013	0.011	0.005	-0.007	-0.01	0.002	-0.007	-0.007	0.01
Antepartum hemorrhage, abruptio placentae, and placenta previa	pregnancy complications	0.021	0.022	0.011	0.002	0.001	-0.008	-0.012	-0.006	0.03	0.002	-0.001	-0.015	0.021	0.005	-0.007	0.018	-0.006	0.01	-0.001	0.026	-0.008	0.021	0.174	-0.007	-0.007	0.017	0	0.007	0.014	0.012	0.006	0.003	-0.01	0.013	-0.007	0.014	0.009
Early or threatened labor; hemorrhage in early pregnancy	pregnancy complications	0.023	0.049	0.012	0.004	0.009	0.013	-0.008	0.023	0.046	0.033	0.015	-0.008	0.04	-0.004	-0.008	0.033	-0.003	0.022	0.018	0.015	0.006	0.052	0.281	-0.008	-0.008	0.012	0.005	0.017	0.039	0.015	0.014	0.001	-0.011	0.037	-0.007	-0.007	0.05
Threatened premature labor	pregnancy complications	0.02	0.06	0.01	0.026	0.024	-0.008	-0.012	0.005	0.047	0.002	-0.008	-0.015	0.048	-0.01	-0.007	0.04	0	0.014	0.03	0.036	-0.008	0.046	0.233	-0.007	-0.007	0.016	-0.008	0.011	0.054	0.019	0.006	0.021	-0.01	0.018	0.013	-0.007	0.046
Hemorrhage in early pregnancy	pregnancy complications	0.016	0.039	0.022	0.004	0.009	0.006	-0.008	-0.007	0.054	0.017	0.003	-0.016	0.04	0.002	-0.008	0.037	-0.008	0.005	0.018	0.025	-0.001	0.041	0.168	-0.008	-0.008	0.016	0.027	0.014	0.048	-0.004	0.004	0.009	-0.011	0.009	0.019	0.002	0.021
Short gestation; low birth weight; and fetal growth retardation	pregnancy complications	-0.009	-0.01	0.006	-0.004	-0.004	-0.008	0.007	0.041	0.029	0.041	0.126	0.093	0.006	0.101	-0.007	-0.013	0.182	-0.014	0	0.021	0.107	-0.015	0.04	0.128	-0.006	0.024	0.009	0.055	-0.006	-0.009	-0.005	-0.007	0.149	0.004	-0.006	0.069	-0.012
Other high-risk pregnancy	pregnancy complications	-0.008	0.063	0.027	-0.003	-0.005	-0.011	-0.027	0.006	0.072	0.008	-0.011	-0.032	0.054	0.002	-0.016	0.03	-0.022	-0.012	0.008	0.036	-0.015	0.054	0.467	-0.011	-0.016	0.008	0.013	0.003	0.012	0.01	-0.003	0.005	-0.024	0.069	-0.011	-0.006	0.096
Hypertension complicating pregnancy, childbirth, and the puerperium	pregnancy complications	0.012	0.035	0.03	0.012	0	0.023	-0.007	0.015	0.045	0.01	-0.007	-0.015	0.018	0.003	-0.007	0.029	-0.012	0.007	0.006	0.029	-0.008	0.039	0.256	-0.007	-0.007	0.009	-0.001	0.019	0.013	0.011	0.005	-0.007	-0.011	0.006	-0.007	-0.007	0.023
Anemia during pregnancy	pregnancy complications	-0.003	0.027	-0.003	0.005	0.004	0.014	-0.007	0.014	0.019	0.009	0.001	-0.016	0.052	0.009	-0.008	0.027	-0.013	0.002	-0.002	0.001	-0.009	0.031	0.222	-0.007	-0.007	0.003	0.013	0.023	0.021	0.01	-0.006	-0.008	-0.011	0.043	0.002	-0.007	0.024
Late pregnancy and failed induction	pregnancy complications	0.016	0.011	-0.008	-0.012	-0.013	-0.002	-0.013	0.003	0.002	-0.008	-0.012	-0.017	0.011	0.002	-0.008	0.004	-0.013	0.009	-0.003	-0.001	-0.009	0.01	0.08	-0.008	-0.008	-0.011	-0.002	0.001	-0.007	0.002	-0.006	0.001	-0.011	-0.001	-0.007	-0.007	-0.003
Other complications of pregnancy NEC	pregnancy complications	0.019	0.068	0.035	0.003	0.002	0.005	-0.013	0.009	0.063	0.014	0.003	-0.023	0.04	0.012	-0.012	0.046	-0.01	0.008	0.008	0.039	-0.009	0.083	0.395	-0.006	-0.012	0.02	0.024	0.014	0.019	0.026	-0.003	-0.001	-0.018	0.041	0	-0.005	0.078
Other conditions or status of the mother complicating pregnancy, childbirth, or the puerperium	pregnancy complications	0.016	0.055	0.026	0	0.004	-0.004	-0.024	0.026	0.061	0.025	-0.007	-0.031	0.031	0	-0.016	0.051	-0.022	0.016	0.012	0.028	-0.014	0.067	0.414	-0.011	-0.016	0.009	0.007	0	0.017	0.021	-0.003	0.006	-0.023	0.022	-0.006	-0.01	0.054
Diabetes or abnormal glucose tolerance complicating pregnancy	pregnancy complications	-0.003	0.06	0.014	0.001	-0.008	0	-0.009	0.007	0.032	0.002	-0.013	-0.021	0.035	-0.004	-0.01	0.043	-0.017	-0.005	0.025	0.031	-0.012	0.037	0.224	-0.01	-0.01	0.008	-0.006	0.008	0.019	0.016	-0.008	0.016	-0.015	0.039	-0.01	-0.002	0.047
Normal delivery	pregnancy complications	-0.005	0.019	-0.006	0.011	0.01	-0.01	-0.015	-0.007	0.015	0.006	-0.016	-0.018	0.007	-0.012	-0.009	0.014	-0.015	-0.003	0.014	0.006	-0.01	0.006	0.092	-0.008	-0.008	-0.005	0.009	0.006	0.017	-0.012	-0.007	-0.001	-0.013	0.001	-0.008	-0.008	0.002
Malposition and malpresentation of fetus or obstruction	pregnancy complications	0.025	0.038	0.004	0.003	-0.011	-0.005	-0.016	-0.008	0.015	0.004	-0.015	-0.02	-0.005	-0.008	-0.01	0.035	-0.016	0.043	0.011	0.003	-0.011	0.025	0.068	-0.009	-0.009	-0.008	0.012	0.017	0.006	0.013	0	0.004	-0.014	0.013	-0.002	-0.009	0.004
Problems associated with amniotic cavity and membranes	pregnancy complications	0.01	0.03	-0.003	-0.007	-0.013	-0.002	-0.013	0.003	0.016	0	-0.012	-0.017	0.001	-0.005	-0.008	0.012	-0.008	0.005	0.004	0.002	-0.001	0.015	0.143	0.001	-0.008	0.011	-0.002	0.009	-0.007	-0.01	-0.006	0.001	-0.006	0.009	-0.007	-0.007	0.011
Other and unspecified complications of birth; puerperium affecting management of mother	pregnancy complications	0.012	0.016	0.014	-0.003	0	0.005	-0.013	0.015	0.016	-0.004	-0.01	-0.021	-0.006	-0.014	-0.01	0.006	-0.017	0.009	0.004	0.012	-0.012	-0.003	0.045	-0.01	-0.01	0.004	0.011	-0.009	-0.002	0.016	0.008	-0.01	-0.015	-0.001	-0.003	-0.009	-0.017
Abnormality of organs and soft tissues of pelvis complicating pregnancy, childbirth, or the puerperium	pregnancy complications	0.003	0.015	0.016	0.007	-0.007	0.001	-0.012	-0.008	0.029	0.01	-0.011	-0.021	0.015	-0.008	-0.01	0.008	-0.012	0.007	-0.001	0.002	-0.011	0.016	0.158	-0.009	-0.009	0.006	-0.006	0.004	-0.002	-0.008	0	0.018	-0.014	0.008	-0.009	-0.009	0.024
Known or suspected fetal abnormality affecting management of mother	pregnancy complications	0.007	0.046	0.015	0.018	0.01	0.008	-0.021	0.016	0.04	-0.001	-0.011	-0.03	0.03	-0.002	-0.014	0.041	-0.021	0.011	0.025	0.029	-0.016	0.039	0.248	-0.014	-0.014	0.017	-0.005	0.008	0.033	0.013	0	0	-0.021	0.036	-0.004	-0.008	0.044
Other perinatal conditions of fetus or newborn	pregnancy complications	-0.011	0.008	0.015	-0.002	-0.008	-0.009	-0.014	0.012	0.024	0.007	0.023	0.006	0.023	0.013	-0.008	0.004	0.025	-0.001	-0.003	0.009	0.019	0.013	0.19	0.009	-0.008	0.014	-0.003	0.024	-0.008	0.007	0.003	-0.008	0.01	0.038	-0.008	0.01	0.034
Fetal distress and abnormal forces of labor	pregnancy complications	0.024	0.026	0.011	-0.007	-0.003	0.012	-0.012	-0.008	0.013	0.003	-0.019	-0.018	0.002	-0.004	-0.01	0.018	-0.004	0	0.01	0.001	-0.011	0.016	0.059	-0.003	-0.01	0.002	0.006	0.024	-0.002	0.002	-0.008	0.004	-0.01	-0.011	-0.002	-0.002	-0.004
Umbilical cord complications during labor and delivery	pregnancy complications	0.003	0.032	-0.014	0.004	0.008	-0.002	-0.013	0.003	-0.008	0.008	-0.019	-0.017	0.005	-0.011	-0.008	0.023	-0.013	0.009	0.024	0.005	-0.009	0.016	0.086	-0.008	-0.008	0.002	-0.002	0.013	0.02	-0.004	-0.007	0.009	-0.012	0.008	-0.008	-0.007	-0.008
Obstetrical/birth trauma	pregnancy complications	0.022	0.042	0.016	0.008	0.013	-0.007	-0.022	0.006	0.016	-0.009	-0.029	-0.026	0	-0.011	-0.013	0.015	-0.016	0.018	0.012	0.006	-0.011	0.011	0.09	-0.002	-0.013	0.013	0.006	-0.011	0.02	0.001	-0.011	0.012	-0.016	-0.003	0.003	-0.012	-0.016
Complications of labor and delivery NEC	pregnancy complications	0.015	0.006	0.006	0.028	0.014	-0.008	-0.011	0.006	0.002	0.003	-0.003	-0.014	0.006	-0.009	-0.007	0.014	-0.005	-0.004	-0.008	-0.001	-0.008	0.019	0.078	-0.006	-0.006	0.003	0.001	0.003	0.026	0.014	0.019	0.003	-0.01	0.015	0.015	-0.006	0.014
Superficial cellulitis and abscess	dermatologic	0.044	0.058	0.038	0.056	0.055	0.061	0.088	0.028	0.08	0.016	0.043	0.016	0.06	0.045	0.012	0.09	0.042	0.068	0.017	0.031	0.025	0.082	0.008	0.027	0.016	0.043	0.014	0.075	0.065	0.036	0.058	0.042	0.03	0.074	0.025	0.026	0.085
Cellulitis and abscess of fingers/toes	dermatologic	0.043	0.065	0.014	0.025	0.036	0.042	0.043	0.025	0.042	0.027	0.014	0.004	0.026	0.029	0.021	0.089	0.022	0.038	0.024	0.023	0.018	0.075	-0.006	0.04	0.014	0.029	0.005	0.026	0.029	0.015	0.021	0.042	0.01	0.037	0.036	-0.002	0.043
Cellulitis and abscess of face/neck	dermatologic	0.026	0.025	0.017	0.003	-0.002	0.007	0.001	-0.008	0.024	-0.003	0.005	-0.003	0.003	0.002	0.004	0.055	0.001	0.043	0.017	0.016	-0.011	0.036	-0.01	0.005	-0.002	0.003	-0.005	0.007	0.006	-0.002	0.018	0.005	0.001	0.013	0.006	-0.009	0.015
Cellulitis and abscess of arm/hand	dermatologic	0.044	0.049	0.018	0.031	0.048	0.048	0.058	0.038	0.05	0.027	-0.016	-0.027	0.029	-0.01	0.008	0.081	-0.009	0.072	0.027	0.017	-0.01	0.08	0.001	-0.012	0.003	0.03	-0.006	0.005	0.05	0.038	0.053	0.024	-0.012	0.076	0.054	-0.001	0.081
Cellulitis and abscess of leg, except foot	dermatologic	0.011	0.062	0.022	0.062	0.046	0.089	0.128	0.017	0.046	-0.003	-0.03	-0.027	0.02	-0.012	0.026	0.09	0.002	0.052	0.027	0.02	-0.006	0.075	-0.007	-0.017	0.015	0.016	0.003	0.004	0.03	0.024	0.038	0.026	-0.014	0.065	0.012	-0.004	0.104
Cellulitis and abscess of foot, toe	dermatologic	0.034	0.035	0.019	0.014	0.013	0.059	0.065	0.027	0.039	0.019	-0.018	-0.016	0.022	-0.007	0.013	0.052	0.002	0.047	0.031	0.006	-0.01	0.04	-0.01	-0.001	0.021	0.029	0.008	-0.012	0.031	0.021	0.028	0.028	-0.013	0.031	0.022	-0.001	0.033
Cellulitis and abscess of trunk	dermatologic	0.029	0.056	0.02	0.04	0.038	0.055	0.066	0.017	0.07	0.01	-0.017	-0.025	0.035	-0.016	-0.001	0.074	-0.006	0.052	0.046	0.039	-0.013	0.072	0.014	-0.006	-0.006	0.039	0.015	0.002	0.056	0.035	0.018	0.062	-0.009	0.077	0.03	-0.005	0.092
Other local infections of skin and subcutaneous tissue	dermatologic	0.023	0.055	0.017	0.039	0.021	0.052	0.072	0.019	0.05	0.006	-0.017	-0.008	0.03	0.001	0.018	0.075	0.003	0.045	0.026	0.023	-0.006	0.072	-0.009	-0.002	0.003	0.034	0.011	0.038	0.021	0.025	0.033	0.039	-0.001	0.035	0.025	-0.007	0.051
Carbuncle and furuncle	dermatologic	0.043	0.041	0.05	0.031	0.013	0.011	0.015	-0.001	0.058	0.009	-0.006	-0.008	0.028	0.001	0.016	0.056	-0.001	0.032	0.031	0.032	0	0.058	0.033	-0.003	0.017	0.015	-0.001	0.026	0.055	0.001	0.032	0.023	-0.006	0.035	-0.003	-0.009	0.067
Impetigo	dermatologic	-0.001	0.012	0	-0.001	-0.011	0.007	0.001	0.008	0.049	0.004	0.12	0.106	0.024	0.095	-0.01	0.005	0.103	0.019	0	0.042	0.045	0.02	0.016	0.056	-0.002	0.029	0.007	0.127	0.014	0.008	0.009	0.005	0.064	0.017	-0.002	0.081	-0.006
Symptoms affecting skin	dermatologic	-0.001	0.037	0.022	0.009	0.015	0.007	0.009	0.004	0.021	-0.001	-0.025	-0.018	0.01	-0.007	-0.011	0.036	-0.016	0.026	0	0.01	-0.013	0.037	-0.007	-0.011	0.001	0.03	-0.008	0.04	0.002	0.007	-0.002	0.006	-0.009	-0.002	-0.005	-0.004	0.02
Rash and other nonspecific skin eruption	dermatologic	0.043	0.094	0.055	0.052	0.049	0.048	0.071	0.041	0.117	0.044	-0.019	-0.014	0.043	-0.004	0.032	0.109	-0.007	0.082	0.033	0.063	-0.017	0.106	-0.002	-0.009	0.044	0.059	0.02	0.062	0.055	0.051	0.041	0.055	-0.009	0.053	0.028	0	0.066
Localized superficial swelling, mass, or lump	dermatologic	0.046	0.047	0.038	0.028	0.013	0.028	0.02	0.01	0.039	0.035	-0.012	-0.018	-0.003	-0.01	0.004	0.06	0	0.032	0.031	0.017	-0.004	0.045	-0.01	0.006	0.018	0.024	-0.005	0.043	0.029	0.019	0.012	0.021	-0.013	0.015	0.023	-0.002	0.026
Disturbance of skin sensation	dermatologic	0.066	0.116	0.065	0.043	0.041	0.041	0.043	0.028	0.127	0.012	-0.029	-0.032	0.018	-0.011	0.008	0.147	-0.018	0.078	0.033	0.075	-0.019	0.146	0.004	-0.016	0.042	0.043	0.004	0.034	0.05	0.052	0.026	0.082	-0.012	0.05	0.031	-0.008	0.112
Disorder of skin and subcutaneous tissue NOS	dermatologic	0.084	0.123	0.054	0.04	0.032	0.009	0.013	0.003	0.048	0	-0.066	-0.06	0.003	-0.033	0.017	0.11	-0.036	0.073	0.035	0.021	-0.024	0.111	-0.025	-0.025	0.022	0.02	-0.007	0.068	0.034	0.014	0.032	0.031	-0.035	0.017	-0.004	-0.015	0.063
Seborrheic dermatitis	dermatologic	0.013	0.057	0.026	0.031	0.023	0	-0.006	0.037	0.049	0.013	0.006	0.002	0.026	0.019	0.027	0.077	0.017	0.033	0.043	0.039	0.001	0.081	-0.009	0.016	0.015	0.043	0.007	0.045	0.054	0.017	0.033	0.019	0.009	0.02	0.03	0.004	0.04
Congenital anomalies of skin	dermatologic	0.003	0.013	0.001	-0.012	-0.008	0.012	-0.008	0.013	0.029	0	0.025	0.012	-0.009	0.026	0	0.014	0.027	0	0.024	0.011	0.028	0.026	0.007	0.018	0.009	-0.007	-0.002	0.022	-0.007	0.008	0.014	0.025	0.023	0.003	0.001	0.028	0.003
Other dyschromia	dermatologic	0.03	0.04	0.02	-0.003	-0.007	0	-0.004	-0.005	0.03	-0.017	-0.034	-0.033	0.007	-0.022	-0.001	0.048	-0.019	0.018	0	0	-0.02	0.034	-0.012	-0.012	0.022	0.022	0.005	0.032	0.002	-0.012	0	0.018	-0.022	-0.008	-0.009	-0.014	0.024
Rosacea	dermatologic	0.036	0.056	0.016	0.018	0.018	0.009	0	-0.008	0.055	0.001	-0.036	-0.039	0.005	-0.019	0.027	0.079	-0.03	0.035	0.035	0.018	-0.016	0.067	0	-0.019	0.021	0.006	0.002	0.023	0.028	-0.01	-0.007	0.031	-0.021	-0.003	-0.015	-0.018	0.023
Systemic lupus erythematosus	dermatologic	-0.005	0.004	0.014	-0.008	0.001	0.017	0.015	-0.007	0.029	-0.009	-0.023	-0.018	-0.001	-0.012	-0.008	0.017	-0.009	0.002	0.009	0.002	-0.01	0.013	0.006	-0.008	-0.008	0.017	0.004	-0.01	-0.008	0.012	0.012	0.023	-0.012	0.019	-0.008	-0.008	0.012
Prurigo and Lichen	dermatologic	-0.01	0.05	0.005	-0.002	0.012	0.002	0.006	-0.003	0.031	-0.006	-0.006	-0.018	0.008	-0.011	-0.005	0.051	-0.012	0.024	0.02	0.013	-0.008	0.056	-0.006	-0.005	0.001	0.021	-0.008	0.023	0.002	-0.006	0.019	0.018	-0.004	0.011	-0.005	0.002	0.02
Other specified erythematous conditions	dermatologic	0.041	0.054	0.032	-0.008	-0.009	0.027	0.033	0.021	0.052	0.008	-0.014	-0.019	0.011	-0.01	0.034	0.063	-0.014	0.033	0.05	0.02	-0.006	0.064	0.001	-0.01	0.023	0.02	-0.007	0.01	0.039	0.01	0.007	0.035	-0.015	0.03	0.01	0.004	0.034
Psoriasis vulgaris	dermatologic	0.03	0.044	0.035	0.026	0.018	0.008	0.015	0.007	0.039	-0.004	-0.026	-0.016	0.03	-0.015	0.019	0.055	-0.016	0.026	-0.002	0.026	-0.014	0.062	0.004	-0.011	0.016	0.028	0.007	0.02	0.027	0.028	0.013	0.015	-0.014	0.023	0.026	0.004	0.052
Psoriatic arthropathy	dermatologic	0.01	0.022	0.002	-0.007	-0.007	-0.002	0.008	-0.007	0.015	0	-0.015	-0.016	0.021	-0.011	-0.008	0.029	-0.013	0.018	0.018	-0.01	-0.009	0.026	-0.008	-0.008	0.001	0.021	0.005	0.004	0.011	0.015	0.004	0.001	-0.005	0.009	0.01	0.002	0.021
Sarcoidosis	dermatologic	0.004	0.012	-0.007	0.006	0.005	0.022	0.009	-0.006	0.01	-0.008	-0.02	-0.016	0.002	-0.01	0.01	0.019	-0.007	0.003	-0.002	0.002	-0.008	-0.004	-0.008	-0.007	0.011	0	-0.001	0.002	0.012	-0.003	0.016	0.011	-0.005	0.011	0.002	0.003	0.005
Pruritus and related conditions	dermatologic	0.045	0.08	0.044	0.044	0.043	0.035	0.035	0.047	0.088	0.033	0.002	-0.01	0.035	0.012	0.009	0.095	0	0.07	0.047	0.057	0.006	0.098	-0.001	0.01	0.022	0.045	0.021	0.044	0.049	0.062	0.036	0.028	0	0.025	0.035	0	0.034
Corns and callosities	dermatologic	0.061	0.073	0.02	0.02	0.015	0.053	0.054	0.003	0.058	0.011	-0.037	-0.03	0.005	-0.014	0.025	0.084	-0.014	0.047	0.044	0.036	-0.017	0.081	-0.016	-0.005	0.031	0.018	-0.014	0.02	0.025	0.007	0.069	0.035	-0.019	0.016	0	-0.009	0.067
Other hypertrophic and atrophic conditions of skin	dermatologic	0.055	0.085	0.035	0.029	0.022	0.018	0.003	-0.006	0.067	0.004	-0.029	-0.03	0.009	-0.019	0.005	0.079	-0.013	0.065	0.052	0.035	-0.009	0.072	-0.019	-0.013	0.007	0.026	-0.008	0.042	0.027	0.012	0.003	0.022	-0.012	0.022	0.008	-0.009	0.041
Keratoderma, acquired	dermatologic	0.053	0.045	0.019	0.017	0.012	0.029	0.027	0.016	0.023	0.004	-0.028	-0.023	-0.002	-0.017	-0.001	0.043	-0.017	0.033	0.017	0.004	-0.014	0.035	-0.013	-0.012	0.022	0	-0.005	0.019	0.036	0.009	0.017	0.038	-0.01	0.002	0.006	-0.005	0.04
Scar conditions and fibrosis of skin	dermatologic	0.025	0.048	0	0.02	0.009	0.008	0.027	0.015	0.04	-0.001	-0.012	-0.021	-0.006	-0.016	0.014	0.065	-0.004	0.045	0.028	0.009	-0.012	0.042	-0.011	-0.004	0.015	0.019	-0.013	0.019	0.017	0.005	0.022	0.019	-0.005	0.019	0.011	-0.003	0.033
Circumscribed scleroderma	dermatologic	0.026	0.032	0.014	0.007	0.016	0.018	0.005	0.002	0.016	0.007	-0.02	-0.018	-0.001	-0.012	0.007	0.054	-0.014	0.026	0.016	0.008	-0.01	0.056	-0.009	-0.008	0	0.008	-0.01	0.002	0.018	0.001	0.012	0.023	-0.007	0.01	-0.008	-0.008	0.005
Acquired acanthosis nigricans	dermatologic	-0.001	0.025	0.018	-0.004	-0.004	0.018	-0.005	0.076	0.022	0.032	0.063	0.035	0.035	0.071	0.003	0.027	0.037	0.016	0.024	0.029	0.045	0.027	0.012	0.025	0.004	0.055	0.001	0.02	0.015	0.006	0.019	-0.007	0.025	-0.001	0.025	0.005	-0.01
Actinic keratosis	dermatologic	0.046	0.045	-0.003	0.02	0.012	0.011	0.024	-0.021	0.018	-0.024	-0.082	-0.07	-0.021	-0.044	0.031	0.06	-0.051	0.02	-0.016	-0.007	-0.036	0.04	-0.033	-0.03	0.029	-0.003	-0.018	0.024	-0.012	-0.018	-0.003	0.007	-0.044	-0.009	-0.02	-0.024	0.064
Seborrheic keratosis	dermatologic	0.064	0.074	0.012	0.02	0.006	-0.006	0.014	-0.028	0.025	-0.014	-0.098	-0.086	-0.019	-0.053	0.017	0.085	-0.06	0.046	-0.009	0.001	-0.043	0.072	-0.04	-0.039	0.029	0.003	-0.013	0.044	-0.003	-0.018	0.004	0.017	-0.054	-0.007	-0.015	-0.028	0.059
Diseases of nail, NOS	dermatologic	0.062	0.06	0.031	0.025	0.018	0.059	0.055	0.02	0.04	0.015	-0.035	-0.027	0.019	-0.017	0.025	0.073	0.002	0.046	0.054	0.035	-0.008	0.076	-0.014	0.001	0.03	0.013	-0.009	0.03	0.038	0.009	0.051	0.046	-0.007	0.017	-0.003	-0.007	0.075
Ingrowing nail	dermatologic	0.04	0.077	0.022	0.023	0.037	0.024	0.036	0.01	0.041	0.027	-0.012	-0.012	0.024	0.005	0.013	0.095	-0.012	0.041	0.024	0.022	-0.008	0.082	-0.006	0.002	0.005	0.027	-0.009	0.033	0.03	0.006	0.027	0.03	-0.012	0.02	0.024	-0.006	0.061
Diseases of hair and hair follicles	dermatologic	-0.001	0.012	0.03	0.022	0.008	0.001	0.013	0.006	0.041	0.003	0	-0.004	0.017	-0.002	-0.007	0.014	-0.005	-0.004	0	0.032	0.019	0.036	0.012	-0.006	-0.007	0.008	0.009	0.003	-0.006	0.028	-0.006	0.003	0.004	0.031	-0.006	0.026	0.016
Alopecia	dermatologic	0.036	0.037	0.036	0.013	0.002	0.003	-0.006	-0.005	0.071	0.017	0.002	-0.02	0.001	-0.003	-0.003	0.068	-0.003	0.033	0.031	0.035	0.008	0.056	0.02	0.004	0.009	0.021	-0.002	0.023	0.021	0.022	0.014	0.003	-0.001	0.01	0.009	-0.001	0.017
Hirsutism	dermatologic	0.021	0.043	0.04	-0.007	0.002	-0.009	0.001	0.012	0.038	0.008	0.012	-0.009	0.062	0.007	-0.008	0.056	0.006	0.024	0.03	0.037	0.02	0.04	0.038	0.018	-0.008	0.049	-0.002	0.002	0.019	0.014	0.003	0.008	0	0.021	0.01	-0.008	0.014
Other specified diseases of hair and hair follicles	dermatologic	0.03	0.053	0.02	0.026	0.027	0.013	0.005	-0.004	0.065	0.003	0.003	-0.018	0.012	0.01	0.004	0.049	-0.008	0.017	0.011	0.047	0.009	0.039	0.007	-0.012	0.015	0.029	0.008	0.023	0.023	0.016	0.009	0.036	-0.003	0.03	0.005	-0.006	0.044
Hyperhidrosis	dermatologic	0.073	0.076	0.05	0.048	0.038	0.038	0.042	0.009	0.082	0.019	0.004	-0.013	0.029	-0.005	-0.002	0.105	-0.004	0.053	0.029	0.047	-0.014	0.087	-0.003	-0.012	0.016	0.036	0.013	0.02	0.041	0.041	0.056	0.053	0.005	0.052	0.04	0.006	0.077
Acne	dermatologic	0.026	0.067	0.046	0.001	-0.001	-0.006	-0.011	0.015	0.064	0.015	0.098	0.022	0.047	0.054	-0.01	0.046	0.021	0.016	0.022	0.061	0.037	0.05	0.039	0.037	-0.013	0.034	0.031	0.077	0.021	0.014	0.004	0.017	0.013	-0.004	0.027	0.028	-0.007
Sebaceous cyst	dermatologic	0.052	0.073	0.014	0.024	0.016	0.006	0	0.006	0.057	0.002	-0.045	-0.048	0.003	-0.028	0.021	0.076	-0.035	0.046	0.004	0.01	-0.023	0.06	-0.013	-0.015	0.014	0.01	0.005	0.025	0.023	0.01	0.018	0.018	-0.03	-0.001	-0.003	-0.023	0.081
Other specified diseases of sebaceous glands	dermatologic	0.021	0.043	0.03	-0.002	-0.003	0.027	0.044	0.002	0.024	0.003	-0.012	-0.021	0.022	-0.017	0.014	0.065	-0.011	0.023	0.007	0.02	-0.014	0.05	-0.013	-0.006	0.026	0.029	0.018	0.019	0.035	0.012	0.016	0.009	-0.011	0.012	-0.006	-0.006	0.036
Decubitus ulcer	dermatologic	0.001	0.031	-0.005	0.017	0.016	0.085	0.156	0.002	0.024	0.014	-0.013	-0.014	0.008	-0.012	0.062	0.057	0.014	0.033	0.028	0.007	-0.01	0.044	-0.009	0	0.032	0.045	-0.01	-0.004	0.009	0.006	0.05	0.015	0.004	0.04	0.016	0	0.054
Chronic ulcer of leg or foot	dermatologic	0.024	0.046	0.007	0.028	0.016	0.058	0.104	-0.011	0.018	0.002	-0.032	-0.027	0.008	-0.014	0.024	0.076	-0.005	0.018	0.023	-0.007	-0.014	0.051	-0.014	-0.012	0.02	0.019	-0.001	-0.007	0.017	0.003	0.021	0.024	-0.015	0.04	0.01	-0.006	0.079
Chronic ulcer of unspecified site	dermatologic	0.002	0.041	-0.004	0.025	0.018	0.041	0.052	0.003	0.035	0	-0.002	-0.013	0.005	0.001	0	0.055	-0.013	0.021	0.017	0.014	-0.009	0.051	-0.009	-0.008	0.001	0.019	-0.002	-0.002	0.019	0.014	0.034	0.009	-0.012	0.044	0.001	-0.007	0.052
Sicca syndrome	dermatologic	0.02	0.022	0.028	0.008	0.017	0.018	0.02	-0.007	0.028	0.007	-0.012	-0.018	0.013	-0.006	0	0.044	-0.009	0.011	-0.01	0.041	-0.009	0.032	-0.001	-0.008	0	-0.008	0.011	-0.005	0.035	0.025	0.003	0.024	-0.007	0.024	0.009	-0.008	0.022
Systemic sclerosis	dermatologic	-0.001	0.003	0.019	-0.004	0.002	-0.008	-0.005	-0.006	0.015	0.003	-0.017	-0.014	-0.012	-0.009	-0.007	0.01	-0.011	0.006	0	-0.004	-0.008	0.012	-0.007	-0.006	-0.006	0.003	-0.008	-0.017	0.016	0.006	-0.005	-0.007	-0.01	-0.001	0.015	-0.006	-0.005
Unspecified diffuse connective tissue disease	dermatologic	0.019	0.002	0.015	-0.005	0.012	0.008	0.016	0.005	0.024	0.001	0.007	-0.015	-0.002	-0.01	0.002	0.026	-0.001	0.026	0.006	0	-0.008	0.012	-0.008	0.003	0.012	0.005	-0.008	0.004	0.013	-0.003	0.027	0.011	0.009	0.007	0.003	-0.007	0.009
Unspecified osteomyelitis	musculoskeletal	0.013	-0.005	-0.006	0.026	0.025	0.05	0.107	0.002	0.009	-0.009	-0.016	-0.014	0.003	-0.012	0.014	0.036	-0.01	0.021	0.008	-0.008	-0.01	0.026	-0.009	-0.008	0.015	0.003	-0.004	-0.007	-0.008	0	-0.007	0.007	-0.013	0.03	0	-0.008	0.048
Rheumatoid arthritis and other inflammatory polyarthropathies	musculoskeletal	0.022	0.033	0.017	0.019	0.007	0.018	0.002	-0.004	0.024	-0.013	-0.021	-0.021	-0.006	-0.013	-0.012	0.043	-0.021	0.017	0.02	0.016	-0.014	0.029	-0.013	-0.012	0.016	-0.002	0.008	0.019	0	0.024	0.016	0.004	-0.014	0.021	0	-0.012	0.026
Rheumatoid arthritis	musculoskeletal	0.016	0.024	0.001	0.003	-0.004	0.01	0.013	-0.002	0.024	0.002	-0.032	-0.032	-0.008	-0.017	0.012	0.048	-0.025	0.034	0.007	0.017	-0.017	0.03	-0.016	-0.014	0.004	0.006	-0.002	0.01	0.01	0.021	0.037	0.03	-0.022	0.012	-0.005	-0.014	0.043
Sacroiliitis NEC	musculoskeletal	0.003	0.04	0.007	0.015	0.017	0.011	0.024	-0.001	0.047	0.003	-0.019	-0.021	0.006	-0.014	0.017	0.069	-0.017	0.026	0.026	0.03	-0.011	0.061	-0.011	-0.01	0.018	0.005	-0.006	0	0.005	0.007	0	0.017	-0.015	0.025	0.018	-0.002	0.037
Unspecified polyarthropathy or polyarthritis	musculoskeletal	0.037	0.021	-0.008	0.011	0.01	0.021	0.019	-0.007	0.027	-0.008	-0.011	-0.016	-0.008	-0.011	0.001	0.052	-0.013	-0.003	0.005	0.016	-0.009	0.032	-0.008	-0.007	0.019	-0.006	0.006	0	0.002	0.009	0.025	0.019	-0.011	0.01	-0.007	-0.007	0.044
Arthropathy NOS	musculoskeletal	0.049	0.083	0.035	0.061	0.038	0.03	0.041	-0.006	0.054	-0.004	-0.047	-0.048	0.011	-0.028	0.031	0.12	-0.028	0.054	0.052	0.014	-0.024	0.093	-0.022	-0.016	0.042	0.032	-0.009	0.024	0.033	0.03	0.032	0.052	-0.03	0.047	0.009	-0.015	0.082
Polymyalgia Rheumatica	musculoskeletal	0.002	0.003	-0.009	0.013	0.002	-0.01	0.001	-0.007	0.001	-0.009	-0.025	-0.017	-0.001	-0.011	0.032	0.007	-0.014	0.003	-0.01	-0.009	-0.009	0.002	-0.009	-0.008	0.008	-0.008	-0.003	0.003	0.001	0.001	-0.007	0.008	-0.012	0.002	0.001	-0.008	0.014
Spinal stenosis	musculoskeletal	0.003	0.054	0.031	0.031	0.036	0.056	0.033	-0.003	0.065	0.013	-0.034	-0.033	0.014	-0.019	0.01	0.094	-0.024	0.031	0.005	0.022	-0.018	0.063	-0.013	-0.015	0.033	0.032	0.011	0.014	0.041	0.04	0.018	0.07	-0.02	0.052	0.016	-0.01	0.086
Spinal stenosis of lumbar region	musculoskeletal	0.026	0.052	0.02	0.022	0.02	0.049	0.07	-0.006	0.061	0	-0.042	-0.045	0.016	-0.027	0.047	0.091	-0.032	0.036	0.003	0.032	-0.024	0.076	-0.016	-0.02	0.05	0.007	-0.008	-0.004	0.026	0.019	0.014	0.071	-0.022	0.056	0.004	-0.013	0.1
Spondylosis without myelopathy	musculoskeletal	0.057	0.111	0.043	0.078	0.075	0.064	0.075	0.014	0.085	0.017	-0.069	-0.071	0.041	-0.041	0.042	0.166	-0.047	0.121	0.038	0.043	-0.037	0.155	-0.028	-0.031	0.043	0.058	-0.005	0.041	0.057	0.059	0.027	0.093	-0.044	0.098	0.041	-0.02	0.135
Spondylosis with myelopathy	musculoskeletal	0.022	0.03	0.011	0.019	0.031	0.04	0.029	-0.008	0.05	0.019	-0.02	-0.019	0.018	-0.013	-0.002	0.078	-0.006	0.04	0.019	0.031	-0.01	0.059	-0.01	-0.009	0.021	0.024	-0.004	-0.001	0.055	0.032	0.019	0.094	-0.008	0.059	0.022	-0.001	0.045
Displacement of intervertebral disc	musculoskeletal	0.067	0.086	0.036	0.026	0.028	0.049	0.048	0.011	0.085	0.015	-0.046	-0.049	0.026	-0.026	0.02	0.118	-0.037	0.054	0.016	0.056	-0.025	0.104	-0.003	-0.017	0.016	0.032	-0.003	0.016	0.048	0.075	0.03	0.083	-0.031	0.08	0.036	-0.019	0.107
Degeneration of intervertebral disc	musculoskeletal	0.062	0.123	0.021	0.058	0.056	0.051	0.074	0.011	0.087	0.016	-0.066	-0.067	0.045	-0.037	0.039	0.166	-0.049	0.075	0.017	0.057	-0.036	0.144	-0.014	-0.028	0.042	0.041	-0.004	0.012	0.04	0.07	0.032	0.093	-0.037	0.092	0.028	-0.022	0.143
Postlaminectomy syndrome	musculoskeletal	0.006	0.059	0.003	0.001	0.005	0.029	0.031	-0.007	0.048	-0.002	-0.011	-0.019	0.033	-0.007	0.021	0.069	-0.006	0.05	-0.005	0.028	-0.01	0.052	-0.009	-0.008	0.015	0.011	-0.01	-0.004	0.008	0	0.002	0.097	-0.013	0.058	0.015	-0.008	0.045
Other and unspecified disc disorder	musculoskeletal	0.018	0.055	0.023	0.029	0.027	0.018	0.025	0.011	0.065	0.012	-0.016	-0.021	0.008	-0.015	0.013	0.073	-0.012	0.042	-0.004	0.045	-0.007	0.066	-0.001	-0.005	0.02	0.009	-0.013	0.017	0.041	0.043	0.027	0.037	-0.016	0.038	0.008	-0.004	0.057
Other disorders of cervical region	musculoskeletal	0.014	0.041	0.012	-0.006	-0.007	0.012	0.033	0.008	0.065	0.01	-0.016	-0.017	0.014	-0.008	-0.003	0.068	-0.012	0.038	0.005	0.032	-0.011	0.065	0.002	-0.009	-0.003	0.031	0	0.017	0.042	0.023	0.017	0.086	-0.005	0.038	0.019	0.005	0.019
Torticollis	musculoskeletal	0.036	0.035	0	0.02	0.001	-0.008	0.023	0.005	0.016	0.002	0.022	0.032	0.032	0.019	0.012	0.021	0.029	0.01	-0.008	0.023	0.009	0.033	0.002	0.003	0.023	0.007	0.008	0.032	0.014	0.034	0.006	0.003	0.023	0.003	-0.007	0.004	0.022
Disorders of sacrum	musculoskeletal	0.037	0.06	0.013	-0.001	0.012	0.02	0.006	0.009	0.026	-0.003	-0.019	-0.016	0.008	-0.013	0.012	0.06	-0.007	0.044	0.017	0.025	-0.004	0.065	-0.01	-0.009	0.013	0.015	0.001	0.025	0.022	0.025	0.001	0.069	-0.014	0.041	0.013	-0.009	0.043
Other symptoms referable to back	musculoskeletal	0.015	0.049	0.023	0.036	0.03	0.025	0.039	0.028	0.048	0.031	-0.002	-0.023	0.032	-0.001	0.014	0.069	-0.014	0.04	0.007	0.038	-0.012	0.084	0	-0.01	0.015	0.028	-0.007	0.02	0.024	0.042	-0.001	0.04	-0.016	0.042	0.009	-0.01	0.049
Other unspecified back disorders	musculoskeletal	0.013	0.018	0.01	-0.005	-0.005	0.024	0	-0.006	0.026	0.002	0.001	-0.006	0.004	-0.003	0.002	0.049	0.011	0.018	-0.009	0.004	0.033	0.031	-0.007	-0.007	0.022	0.006	0.016	0.005	0.024	0.012	0.006	0.012	0.003	0.018	0.003	0.003	0.025
Peripheral enthesopathies and allied syndromes	musculoskeletal	0.084	0.134	0.051	0.051	0.043	0.036	0.035	-0.001	0.084	0.017	-0.074	-0.075	0.015	-0.041	0.004	0.16	-0.054	0.093	0.029	0.061	-0.037	0.158	-0.028	-0.032	0.026	0.038	-0.002	0.032	0.047	0.038	0.027	0.058	-0.051	0.046	0.006	-0.026	0.109
Enthesopathy	musculoskeletal	0.091	0.151	0.05	0.043	0.032	0.024	0.037	-0.004	0.098	0.026	-0.07	-0.071	0.022	-0.046	0.021	0.17	-0.05	0.101	0.048	0.059	-0.031	0.159	-0.019	-0.027	0.039	0.017	-0.022	0.053	0.033	0.035	0.015	0.082	-0.049	0.034	0.017	-0.023	0.084
Synoviopathy	musculoskeletal	0.022	0.034	-0.002	0.028	0.008	0.012	0.02	-0.003	0.024	0.011	-0.027	-0.024	0	-0.016	0.006	0.044	-0.016	0.029	0.015	0.019	-0.013	0.042	-0.012	-0.011	0.025	0.009	-0.003	0.014	0.027	0.007	0.026	0.024	-0.017	0.011	0.008	-0.011	0.036
Bursitis	musculoskeletal	0.025	0.047	0.018	0.03	0.003	0.006	0.003	-0.001	0.026	0.015	-0.041	-0.035	0.009	-0.019	-0.01	0.043	-0.025	0.037	0.013	0.012	-0.02	0.048	-0.011	-0.013	-0.005	0.014	-0.001	0.014	-0.004	0.011	0.009	0.033	-0.018	0.028	-0.009	-0.012	0.036
Calcaneal spur; Exostosis NOS	musculoskeletal	0.068	0.07	0.018	0.013	0.014	0.012	0.001	0.018	0.028	0.018	-0.037	-0.033	0.003	-0.018	-0.007	0.087	-0.021	0.066	0.06	0.018	-0.014	0.086	-0.012	-0.015	-0.002	0.032	-0.007	0.068	0.023	0.032	0.019	0.029	-0.023	0.024	0.027	-0.014	0.025
Other disorders of synovium, tendon, and bursa	musculoskeletal	0.022	0.03	0.022	0.027	0.021	0.017	0.003	-0.001	0.023	0.021	-0.031	-0.021	-0.003	-0.014	0.003	0.042	-0.013	0.028	0.014	0.012	-0.012	0.048	0.002	-0.01	0.017	0.025	-0.006	0.032	0.019	0.011	0.007	0.016	-0.015	0.024	0.011	-0.002	0.037
Synovitis and tenosynovitis	musculoskeletal	0.081	0.092	0.034	0.041	0.034	0.031	0.022	0.002	0.058	0.021	-0.049	-0.051	0.027	-0.035	-0.003	0.129	-0.034	0.071	0.041	0.032	-0.026	0.128	0.002	-0.023	0.012	0.028	-0.004	0.024	0.056	0.026	0.036	0.056	-0.032	0.031	0.008	-0.019	0.082
Bursitis disorders	musculoskeletal	0.017	0.032	0.013	0.005	-0.001	0.014	0.008	-0.006	0.023	0.001	-0.014	-0.016	0.007	-0.01	0.018	0.025	-0.013	0.006	0.005	0.007	-0.009	0.026	-0.008	-0.007	0.01	0.008	-0.009	-0.007	0.002	0.016	-0.006	0.036	-0.005	0.005	-0.007	-0.007	0.032
Ganglion and cyst of synovium, tendon, and bursa	musculoskeletal	0.044	0.069	0.031	0.026	0.019	-0.002	0.004	0.005	0.042	0.01	-0.022	-0.032	0.015	-0.017	0.003	0.073	-0.021	0.052	0.012	0.023	-0.019	0.093	0.009	-0.012	0.013	0.029	0.001	0.02	0.015	0.011	0.006	0.032	-0.013	0.013	-0.008	-0.003	0.047
Rupture of synovium	musculoskeletal	-0.001	0.032	0.019	0.028	0.04	0.002	0.002	0.001	0.02	0.005	-0.02	-0.019	0.005	-0.013	0.005	0.036	-0.015	0.014	0.007	0.014	-0.01	0.03	-0.01	-0.009	0.006	0.017	0.002	0.022	0.015	-0.001	0.001	0.013	-0.013	0.027	0.007	-0.009	0.027
Rupture of tendon, nontraumatic	musculoskeletal	0.022	0.03	0.018	0.012	0.024	-0.005	0.029	-0.004	0.031	0.013	-0.023	-0.026	0.013	-0.017	0.042	0.053	-0.018	0.047	0.003	0.008	-0.009	0.047	-0.013	-0.012	0.049	0.01	-0.01	0.019	0.006	0.02	0.029	-0.001	-0.018	0.01	0	-0.012	0.058
Contracture of tendon (sheath)	musculoskeletal	0.002	-0.007	0.006	-0.002	-0.003	-0.002	-0.009	0.012	0.011	0.008	0.147	0.107	-0.005	0.043	0	-0.009	0.076	0.004	0.01	0.022	0.114	-0.001	-0.009	0.035	-0.008	0.014	0.033	0.023	0.001	-0.005	-0.007	-0.008	0.068	0.007	-0.008	0.045	-0.031
Laxity of ligament or hypermobility syndrome	musculoskeletal	-0.011	-0.008	0.008	-0.004	-0.004	-0.003	-0.005	0.002	0.018	0.028	0.093	0.045	0.011	0.05	-0.001	-0.018	0.064	-0.007	0.014	0.045	0.037	0.006	-0.002	0.023	-0.001	0.031	0.016	0.015	0	0.006	-0.007	0.022	0.04	-0.008	0.008	0.016	-0.041
Fasciitis	musculoskeletal	0.059	0.112	0.026	0.037	0.02	0.003	0.006	0.008	0.061	0.021	-0.047	-0.044	0.008	-0.023	0.017	0.092	-0.031	0.059	0.06	0.035	-0.022	0.098	-0.005	-0.018	0.008	0.027	-0.004	0.008	0.018	0.022	0.017	0.033	-0.029	0.019	0.003	-0.02	0.048
Contracture of palmar fascia [Dupuytren's disease]	musculoskeletal	0.02	0.011	-0.001	0.019	0.024	0	0.005	-0.006	0.02	-0.007	-0.012	-0.015	0.004	-0.01	0.011	0.025	-0.012	0.008	-0.001	-0.01	-0.008	0.025	-0.008	-0.007	0.022	0.001	-0.008	0.002	-0.007	-0.01	0.017	-0.007	-0.01	0.007	-0.007	-0.007	0.028
Other disorders of soft tissues	musculoskeletal	0.035	0.049	0.026	0.032	0.019	0.043	0.077	0.025	0.063	0.022	-0.027	-0.024	0.027	-0.011	0.018	0.069	0.002	0.038	0.053	0.028	-0.013	0.074	-0.001	-0.011	0.007	0.052	0.007	0.025	0.027	0.033	0.019	0.036	-0.017	0.069	0.001	-0.004	0.058
Other disorders of bone and cartilage	musculoskeletal	0.067	0.069	0.023	0.035	0.022	0.023	0.025	-0.002	0.05	-0.002	-0.038	-0.035	0.005	-0.018	0.009	0.078	-0.029	0.044	0.019	0.014	-0.015	0.07	-0.012	-0.006	0.018	0.014	-0.01	0.042	0.01	0.013	0.02	0.02	-0.023	0.026	-0.002	-0.012	0.029
Aseptic necrosis of bone	musculoskeletal	0.013	0.02	0.016	0.049	0.041	0.024	0.062	0.016	0.014	0.011	-0.012	-0.015	0.009	-0.003	0.002	0.041	-0.006	0.009	0.014	0.024	-0.008	0.038	0.001	0.003	0.012	0.02	0	0.016	0.024	0.019	0.005	0.012	-0.01	0.053	0.003	-0.007	0.02
Costochondritis	musculoskeletal	0.059	0.042	0.017	0.027	0.007	0.026	0.012	0.006	0.041	0.021	-0.007	-0.014	0.016	-0.002	0.003	0.06	0	0.03	0	0.063	0.018	0.047	0.02	0.004	0.013	0.017	0.009	0.005	0.015	0.035	-0.006	0.023	0.004	0.003	0.014	-0.006	0.035
Malunion and nonunion of fracture	musculoskeletal	-0.001	0.029	0.006	0.027	0.032	0.017	0.071	0.006	0.029	0.002	-0.007	0	0.011	-0.009	-0.007	0.048	0.012	0.03	0.015	0.006	-0.008	0.049	-0.007	-0.007	0.013	0.028	0.009	0.005	0.015	0.02	0.018	0.052	-0.01	0.025	0.004	-0.006	0.04
Acquired foot deformities	musculoskeletal	0.031	0.038	0.024	0.02	0.005	0.025	0.041	0.001	0.036	0.022	-0.002	-0.01	0.016	-0.01	0.013	0.061	-0.006	0.048	0.035	0.023	-0.006	0.069	-0.014	0.003	0.008	0.023	0.002	0.014	0.021	0.014	-0.004	0.018	-0.001	0.021	0.02	-0.007	0.028
Flat foot	musculoskeletal	0.034	0.034	0.008	0.005	0.014	-0.005	-0.008	-0.011	0.037	0.003	0.022	0.006	0.01	-0.005	-0.012	0.045	0.019	0.045	0.047	0.034	0.015	0.042	-0.003	-0.006	-0.012	0.024	0.013	0.041	0.006	0.012	0.003	0.02	0.001	0.019	0	0.018	0.008
Hammer toe (acquired)	musculoskeletal	0.022	0.049	0.017	-0.011	0.001	0.007	0.009	-0.011	0.033	0.001	-0.021	-0.028	0.006	-0.018	0.007	0.08	-0.022	0.049	0.009	0.015	-0.015	0.07	-0.009	-0.013	0.044	0.017	-0.011	0.024	-0.001	0.005	0.008	0.018	-0.016	0.017	-0.002	-0.012	0.033
Hallux rigidus	musculoskeletal	0.035	0.041	0.011	0.034	0.037	0.009	0.003	-0.008	0.008	-0.002	-0.017	-0.019	0.006	-0.012	0.013	0.057	-0.015	0.048	0.007	0.01	-0.01	0.05	-0.009	-0.009	-0.001	0.022	-0.011	0.028	0.024	0.022	-0.007	0.043	-0.013	0.028	0.015	-0.008	0.015
Hallux valgus (Bunion)	musculoskeletal	0.057	0.058	0.017	0.006	0.026	0.017	0.002	-0.006	0.042	0.009	-0.022	-0.027	0.015	-0.021	0.014	0.103	-0.02	0.08	0.027	0.03	-0.02	0.092	-0.011	-0.005	0.011	0.018	0	0.036	0.013	-0.003	0.005	0.014	-0.012	0.013	0.004	-0.016	0.031
Kyphoscoliosis and scoliosis	musculoskeletal	0.014	0.006	0.004	-0.014	-0.008	-0.002	-0.001	0.002	0.02	-0.004	0.074	0.051	0.011	0.027	-0.007	0.007	0.048	0.014	0.008	0.027	0.058	0.018	-0.009	0.064	0.013	0.007	0.014	0.018	0.035	0.015	-0.006	0.031	0.03	0.019	0.01	0.019	-0.008
Other acquired musculoskeletal deformity	musculoskeletal	0.004	0.01	0.008	0.005	-0.007	0.022	0.014	0.014	0.034	0.018	0.02	0.023	0.017	0.022	0.01	0.017	0.04	0.028	0.019	0.033	0.007	0.018	0	0.02	0.029	0.031	-0.001	0.037	0.021	0.01	0.015	0.001	0.019	0.024	0.011	0.012	0.02
Acquired spondylolisthesis	musculoskeletal	0.03	0.047	0.025	0.019	0.026	0.042	0.026	-0.001	0.038	-0.001	-0.01	-0.03	0.025	-0.012	0.015	0.074	-0.018	0.038	-0.009	0.025	-0.012	0.09	-0.006	-0.009	0.036	0.013	0.004	0.005	0.013	0.032	0.006	0.054	-0.014	0.032	-0.003	-0.008	0.073
Contracture of joint	musculoskeletal	0.007	0.003	-0.001	0.002	0.006	-0.01	0.005	-0.007	0.003	0.014	0.017	0.001	0.012	0.017	-0.001	0.009	0.019	0.01	0.015	-0.007	0.004	0.022	-0.002	0.024	0.016	0.004	0.003	0.024	0.026	0.012	0.012	0.031	0.036	0.001	0	-0.008	-0.002
Osteoarthritis; localized	musculoskeletal	0.072	0.084	0.03	0.04	0.036	0.022	0.028	-0.001	0.032	0.007	-0.077	-0.068	-0.003	-0.043	0.018	0.129	-0.049	0.072	0.057	0.013	-0.037	0.125	-0.026	-0.029	0.004	0.017	-0.005	0.055	0.034	0.02	0.023	0.044	-0.046	0.027	0.015	-0.028	0.089
Osteoarthrosis, localized, primary	musculoskeletal	0.052	0.097	0.03	0.045	0.032	0.022	0.055	0	0.063	0.002	-0.092	-0.082	0.002	-0.049	0.031	0.132	-0.054	0.069	0.022	0.027	-0.044	0.142	-0.036	-0.035	0.044	0.021	-0.006	0.033	0.018	0.02	0.024	0.049	-0.052	0.042	0.013	-0.032	0.11
Osteoarthrosis, generalized	musculoskeletal	0.008	0.032	0.006	-0.009	0.009	0.017	0.028	-0.001	0.083	0.001	-0.038	-0.037	0.02	-0.024	0.038	0.086	-0.027	0.013	0.014	0.045	-0.02	0.065	-0.015	-0.017	0.036	0.014	0	-0.008	-0.003	0.012	0	0.05	-0.014	0.022	0.008	-0.012	0.057
Osteoarthrosis NOS	musculoskeletal	0.065	0.079	0.033	0.039	0.04	0.043	0.087	0	0.096	0.01	-0.092	-0.087	0.009	-0.056	0.062	0.165	-0.058	0.085	0.043	0.033	-0.046	0.159	-0.035	-0.038	0.041	0.02	-0.009	0.013	0.028	0.041	0.041	0.061	-0.054	0.048	0.018	-0.033	0.115
Symptoms and disorders of the joints	musculoskeletal	0.048	0.071	0.034	0.031	0.029	0.006	0.036	0.014	0.05	0.012	-0.017	-0.033	0.006	-0.01	0.006	0.105	-0.019	0.058	0.021	0.041	-0.012	0.106	-0.007	-0.018	0.03	0.029	0.021	0.015	0.021	0.029	0.002	0.036	-0.023	0.038	0.008	-0.014	0.036
Stiffness of joint	musculoskeletal	0.063	0.058	0.03	0.036	0.033	0.024	0.018	-0.006	0.033	0.01	-0.036	-0.041	0.004	-0.022	0.02	0.078	-0.036	0.051	0.022	0.023	-0.022	0.104	-0.022	-0.014	0.019	0.01	-0.003	-0.001	0.029	0.022	0.006	0.018	-0.024	0.012	0.002	-0.016	0.034
Difficulty in walking	musculoskeletal	0.017	0.038	0.007	0.035	0.025	0.063	0.104	-0.011	0.045	0.003	-0.033	-0.037	0.016	-0.025	0.049	0.078	-0.015	0.037	0.017	0.003	-0.021	0.075	-0.016	-0.01	0.071	0.008	-0.012	0.005	0.027	0.026	0.012	0.035	-0.024	0.04	0.006	-0.013	0.071
Joint effusions	musculoskeletal	0.049	0.083	0.039	0.046	0.043	0.043	0.043	0.002	0.041	0.008	-0.021	-0.032	0.03	-0.011	0.003	0.089	-0.022	0.067	0.024	0.017	-0.02	0.089	-0.012	-0.016	0.021	0.031	-0.01	0.057	0.039	0.008	0.02	0.04	-0.025	0.045	0.023	-0.012	0.065
Other derangement of joint	musculoskeletal	0.015	0.077	0.027	0.04	0.027	0.025	0.024	0.006	0.055	0.024	0.015	-0.001	0.028	0.006	0.013	0.075	0.026	0.053	0.042	0.04	0.004	0.062	-0.005	-0.016	0.023	0.03	0.006	0.024	0.012	0.038	0.002	0.03	0.005	0.046	0.011	0.012	0.026
Osteoporosis NOS	musculoskeletal	0.029	0.041	0.014	0.004	0.003	0.023	0.052	-0.012	0.074	-0.002	-0.063	-0.056	0.005	-0.035	0.038	0.095	-0.037	0.04	0.003	0.017	-0.023	0.066	-0.025	-0.022	0.038	0.019	-0.005	0.012	0.015	0.005	0.014	0.023	-0.032	0.006	-0.005	-0.024	0.047
Senile osteoporosis	musculoskeletal	-0.01	0.006	-0.002	-0.003	-0.004	0.017	0.006	-0.01	0.033	0	-0.025	-0.024	-0.01	-0.016	0.012	0.031	-0.019	0.009	-0.014	0.013	-0.013	0.018	-0.012	-0.011	0.019	-0.001	-0.003	-0.003	-0.004	-0.015	-0.002	0.006	-0.008	-0.008	0.002	-0.011	0.017
Other specified osteoporosis	musculoskeletal	-0.001	0.002	-0.005	-0.003	-0.011	0.017	0.038	-0.01	0.037	0.005	-0.027	-0.024	0.007	-0.016	0	0.037	-0.019	0.009	-0.009	0.022	-0.013	0.023	-0.007	-0.011	0.007	0.039	-0.003	-0.005	0.002	-0.002	-0.009	0.024	-0.017	0.011	0.002	-0.011	0.035
Pathologic fracture	musculoskeletal	0.022	0.031	-0.003	0.014	0.017	0.014	0.05	-0.008	0.027	0.019	-0.016	-0.019	0.001	-0.013	0.02	0.057	-0.015	0.003	0.024	0.014	-0.01	0.048	-0.01	-0.009	0.006	0.02	0.002	0.019	0.023	-0.001	-0.008	0.013	-0.013	0.03	0.006	-0.009	0.035
Pathologic fracture of vertebrae	musculoskeletal	0.024	0.023	0.012	0.016	0.015	0.043	0.059	0.01	0.048	0.006	-0.027	-0.015	-0.002	-0.006	0.067	0.045	-0.001	0.02	0.008	0.023	-0.01	0.023	-0.002	-0.008	0.038	0.031	0.009	0.01	0.025	0.005	0.02	0.007	-0.013	0.025	0.008	-0.008	0.03
Stress fracture	musculoskeletal	0.041	0.043	0.01	0.031	0.023	0.016	0.005	-0.006	0.027	0.028	-0.016	-0.011	0.014	-0.01	-0.007	0.049	-0.012	0.031	0.029	0.02	-0.008	0.044	0.001	-0.007	0.002	0.01	0.007	0.023	0.023	0.004	-0.006	0.011	-0.004	0.032	-0.007	-0.007	0.014
Osteopenia or other disorder of bone and cartilage	musculoskeletal	0.064	0.061	0.013	0.004	0.008	0.038	0.045	-0.01	0.069	0.006	-0.065	-0.055	0.003	-0.036	0.013	0.118	-0.039	0.064	0.005	-0.003	-0.03	0.078	-0.031	-0.021	0.027	0.017	-0.019	0.025	0.016	0.007	0.008	0.02	-0.035	0.008	-0.008	-0.019	0.043
Pain in joint	musculoskeletal	0.088	0.182	0.061	0.066	0.061	0.043	0.05	0.009	0.134	0.024	-0.103	-0.142	0.047	-0.057	0.036	0.232	-0.085	0.116	0.045	0.076	-0.053	0.205	-0.015	-0.047	0.052	0.036	-0.009	0.076	0.043	0.053	0.03	0.071	-0.076	0.055	0.03	-0.041	0.168
Cardiac congenital anomalies	congenital anomalies	-0.01	0.011	-0.003	0.026	0.02	0.013	0.002	0.043	0.025	0.025	0.018	0.021	0.011	0.014	0.009	0.008	0.033	-0.008	0.004	0.003	0.014	0	0.016	0.054	0.001	0.029	0.005	0.004	0.011	-0.004	0.024	-0.008	0.03	0.009	0.01	0.002	-0.005
Cardiac shunt/ heart septal defect	congenital anomalies	-0.015	0.006	-0.003	0	-0.004	0.026	0.005	0.01	0.024	0.016	0.002	0.012	-0.001	0.001	0.005	0.007	0.032	0.002	0.004	0.005	0.007	0.009	-0.012	0.054	-0.005	0.01	-0.004	0.01	0.008	-0.011	0.004	0.011	0.019	0	0.001	0.014	0.012
Valvular heart disease/ heart chambers	congenital anomalies	-0.004	0.001	-0.01	0	-0.001	0.01	-0.006	-0.001	-0.003	-0.005	0.004	-0.003	-0.011	0.014	-0.004	-0.011	0.006	-0.009	0.003	-0.006	-0.001	-0.016	-0.011	0.03	-0.01	0.01	-0.007	-0.014	0.004	-0.004	-0.001	0.003	-0.002	0.009	-0.003	-0.003	-0.013
Congenital anomalies of great vessels	congenital anomalies	-0.009	0.002	-0.011	0.021	0.008	0.026	0.007	0.006	0.011	0.022	0.014	0	0	-0.002	-0.007	0.001	0.007	0.006	0.008	-0.008	-0.008	0.008	0.021	0.034	-0.007	0.018	0.001	-0.009	0.015	-0.002	0.018	0.013	0.024	0.02	0.014	-0.006	-0.001
Congenital anomalies of peripheral vascular system	congenital anomalies	-0.009	0	0.001	-0.004	0.008	0.001	0.025	0.018	0.019	-0.007	0.004	-0.009	-0.006	0.006	0.003	0.022	0.001	0.001	0	-0.001	0.001	0.016	0.002	0.004	0.014	0.013	-0.008	0.009	0.005	-0.001	0.007	0.013	-0.003	0.026	0.004	0.015	0.033
Congenital anomalies of face and neck	congenital anomalies	-0.009	-0.011	0	-0.004	-0.005	-0.008	-0.005	0.028	0.015	0.021	0.122	0.119	0.005	0.069	-0.007	-0.016	0.165	-0.009	0.023	0.009	0.061	-0.008	-0.007	0.094	-0.007	0.007	0.034	0.064	-0.006	-0.002	-0.006	-0.007	0.091	-0.013	0.004	0.067	-0.014
Cystic kidney disease	congenital anomalies	-0.007	0.01	-0.005	-0.007	-0.007	0.018	0.021	0	0.006	-0.004	-0.004	-0.017	-0.009	0.001	-0.003	-0.001	0	-0.013	-0.007	-0.008	0.001	-0.004	-0.004	-0.002	0.004	-0.016	-0.012	-0.012	0.006	-0.008	0.008	-0.01	-0.005	0.019	-0.009	-0.002	0.014
Spondylolisthesis, congenital	congenital anomalies	0.02	0.015	0.005	-0.011	0.007	0	-0.006	0.005	0.038	0.002	-0.005	-0.015	0.015	-0.01	-0.007	0.031	-0.012	0.018	0.015	0.032	-0.008	0.029	-0.007	0.003	0.003	0.011	-0.008	0	0.014	0.005	-0.006	0.021	-0.01	0.002	0.013	-0.007	0.023
Congenital deformities of feet	congenital anomalies	0.029	0.01	0.031	-0.002	0.008	-0.002	0.007	0.003	0.015	0.008	0.048	0.048	0.001	0.007	-0.008	0.021	0.057	0.009	0.011	0.014	0.02	0.016	-0.001	0.062	-0.008	-0.002	0.012	0.034	0.02	0.008	0.004	-0.008	0.023	-0.001	0.001	0.011	0
Pectus excavatum	congenital anomalies	-0.013	-0.028	-0.017	-0.016	-0.016	-0.006	-0.013	-0.001	-0.037	-0.01	0.002	-0.014	-0.017	-0.004	-0.003	-0.038	-0.009	-0.017	-0.012	-0.014	-0.011	-0.026	-0.011	-0.01	-0.003	-0.019	-0.006	-0.025	-0.009	-0.013	-0.008	-0.01	-0.01	-0.015	-0.009	-0.002	-0.049
Congenital anomalies of muscle, tendon, fascia, and connective tissue	congenital anomalies	-0.011	0.003	-0.005	-0.013	-0.009	0.003	-0.005	-0.007	0.01	0.006	0.068	0.02	0.021	0.034	-0.009	-0.011	0.032	0.002	-0.011	0.018	0.031	-0.009	-0.009	0.008	-0.008	0.016	0.016	-0.002	0	0	0.021	0.03	0.041	-0.007	-0.008	0.042	-0.029
Chromosomal anomalies	congenital anomalies	-0.009	-0.008	-0.012	-0.011	-0.011	0	0	0.04	0.012	0.021	0.144	0.132	-0.006	0.09	-0.007	-0.026	0.216	-0.009	0.015	0.02	0.137	-0.024	-0.007	0.214	0.003	0.022	0.017	0.032	-0.006	-0.002	0.018	0.003	0.151	-0.007	-0.007	0.077	-0.026
Other and unspecified congenital anomalies	congenital anomalies	-0.006	0.007	0.007	0	-0.005	0.009	0.012	0.027	0.041	-0.009	0.079	0.079	0.019	0.037	0.006	0	0.124	0.015	0.007	0.026	0.075	0.004	-0.002	0.177	-0.001	0.018	0.04	0.019	0	-0.001	-0.007	0.066	0.08	0.016	0.023	0.047	-0.005
Back pain	symptoms	0.095	0.192	0.073	0.075	0.072	0.055	0.071	0.024	0.173	0.035	-0.067	-0.113	0.068	-0.039	0.04	0.249	-0.069	0.124	0.045	0.101	-0.044	0.233	0.034	-0.042	0.056	0.065	-0.004	0.064	0.055	0.081	0.038	0.084	-0.064	0.115	0.049	-0.038	0.193
Cervicalgia	symptoms	0.089	0.168	0.069	0.073	0.062	0.05	0.055	0.026	0.146	0.026	-0.052	-0.071	0.045	-0.033	0.031	0.202	-0.046	0.122	0.037	0.096	-0.021	0.19	0	-0.031	0.036	0.066	0.001	0.042	0.063	0.088	0.019	0.094	-0.043	0.089	0.036	-0.025	0.126
[truncated: 97 more rows]

## Sheet: S6. psych phewas ACMG56
phenotype	phecode	category	predictor	beta	SE	OR	LCI	UCI	p	type	n_total	n_cases	n_controls	ncase_carrier	nctrl_carrier	fisher.p	func_consq	gene
[truncated: 9,287 more rows]

## Sheet: S7. psych phewas CACNA1C
phenotype	phecode	category	predictor	beta	SE	OR	LCI	UCI	p	type	n_total	n_cases	n_controls	ncase_carrier	nctrl_carrier	fisher.p	func_consq	gene
[truncated: 185 more rows]

[truncated: 13 more sheets: S8. psych phewas TCF4, S9. psych phewas (age intr), S10. psych phewas (sex intr), S11. psych phewas (all 58 gens), S12. GO analysis bio process, S13. GO analysis cellular comp, S14. GO analysis molecular func, S15. psych phewas (GObio 34), S16. psych phewas (GOcell 16), S17. psych phewas (GOmol 25), S18. emerge vs. genebass pheno, S19. psych phewas (GeneBass), S20. table 1 in GeneBass]
